# Supplementary material for: Study on Deformation and Permeation Properties of Gas-Containing Fractured Rock
Source: Hindawi journal article supplement (doi:10.1155/2019/1967080), 2019-06-25
Supplement: f1 [file 1967080.f1.zip]

Archive with 3 entries (3 files):
- Sample j1.xls
- Sample j2.xls
- Sample j3.xls
