# Supplementary material for: Study on Deformation and Permeation Properties of Gas-Containing Fractured Rock
Source: Hindawi journal article supplement (doi:10.1155/2019/1967080), 2019-06-25
Supplement: f1 [file 1967080.f1.zip › Sample j1.xls]

## Sheet: sample j1
test number	j1-2.0-0.2-
test data	2017-10-23
tester	yang
specimen gauge length (mm)	106.28
diameter	50
area (mm^2)	1963.5
maximum force (kN)	43.4
compressive strength (MPa)	22.1
yield(kN):	43.02
yield strength(MPa):	21.91
poisson's ratio	0.28
remarks:	liexiyanti
Time(s)	axial force (kN)	displacement (mm)	radial deformation	confining pressure (MPa)	inlet pressure (MPa)	outlet pressure (MPa)	axial stress (MPa)	deviatoric stress (MPa)	axial strain	radial strain	volumetric strain	flow rate	permeability (mD)
5537.73	3.94	0.214	-0.262	2	0.1	0.213	2.00662	0.00662083	0	0	0	0.765	21.2059
5538.83	4.02	0.214	-0.262	2	0.1	0.213	2.04736	0.0473644	0	0	0	0.765	21.2059
5539.81	4.14	0.216	-0.262	2	0.1	0.213	2.10848	0.10848	1.88182e-05	0	1.88182e-05	0.765	21.2059
5540.8	4.2	0.216	-0.262	2	0.1	0.213	2.13904	0.139037	1.88182e-05	0	1.88182e-05	0.765	21.2059
5541.78	4.28	0.216	-0.262	2	0.1	0.213	2.17978	0.179781	1.88182e-05	0	1.88182e-05	0.765	21.2059
5542.77	4.34	0.217	-0.262	2	0.1	0.213	2.21034	0.210339	2.82273e-05	0	2.82273e-05	0.765	21.2059
5543.75	4.4	0.217	-0.262	2	0.1	0.213	2.2409	0.240896	2.82273e-05	0	2.82273e-05	0.765	21.2059
5544.74	4.44	0.217	-0.262	2	0.1	0.213	2.26127	0.261268	2.82273e-05	0	2.82273e-05	0.765	21.2059
5545.83	4.5	0.219	-0.262	2	0.1	0.213	2.29183	0.291826	4.70455e-05	0	4.70455e-05	0.77	21.3445
5546.81	4.56	0.219	-0.262	2	0.1	0.213	2.32238	0.322383	4.70455e-05	0	4.70455e-05	0.77	21.3445
5547.8	4.6	0.219	-0.262	2	0.1	0.213	2.34276	0.342755	4.70455e-05	0	4.70455e-05	0.77	21.3445
5548.78	4.66	0.221	-0.262	2	0.1	0.213	2.37331	0.373313	6.58638e-05	0	6.58638e-05	0.775	21.4831
5549.77	4.7	0.219	-0.262	2	0.1	0.213	2.39368	0.393685	4.70455e-05	0	4.70455e-05	0.775	21.4831
5550.75	4.76	0.221	-0.262	2	0.1	0.213	2.42424	0.424242	6.58638e-05	0	6.58638e-05	0.775	21.4831
5551.73	4.8	0.221	-0.262	2	0.1	0.213	2.44461	0.444614	6.58638e-05	0	6.58638e-05	0.775	21.4831
5552.83	4.86	0.221	-0.262	2	0.1	0.213	2.47517	0.475172	6.58638e-05	0	6.58638e-05	0.775	21.4831
5553.81	4.9	0.222	-0.262	2	0.1	0.213	2.49554	0.495544	7.52729e-05	0	7.52729e-05	0.775	21.4831
5554.8	4.96	0.222	-0.262	2	0.1	0.213	2.5261	0.526101	7.52729e-05	0	7.52729e-05	0.775	21.4831
5555.78	5.02	0.222	-0.262	2	0.1	0.213	2.55666	0.556659	7.52729e-05	0	7.52729e-05	0.775	21.4831
5556.77	5.06	0.224	-0.262	2	0.1	0.213	2.57703	0.577031	9.40911e-05	0	9.40911e-05	0.775	21.4831
5557.75	5.1	0.224	-0.262	2	0.1	0.213	2.5974	0.597403	9.40911e-05	0	9.40911e-05	0.77	21.3445
5558.73	5.14	0.224	-0.262	2	0.1	0.213	2.61777	0.617774	9.40911e-05	0	9.40911e-05	0.77	21.3445
5559.83	5.2	0.226	-0.262	2	0.1	0.213	2.64833	0.648332	0.000112909	0	0.000112909	0.765	21.2059
5560.81	5.26	0.226	-0.262	2	0.1	0.213	2.67889	0.67889	0.000112909	0	0.000112909	0.765	21.2059
5561.8	5.3	0.226	-0.262	2	0.1	0.213	2.69926	0.699262	0.000112909	0	0.000112909	0.765	21.2059
5562.78	5.36	0.226	-0.262	2	0.1	0.213	2.72982	0.729819	0.000112909	0	0.000112909	0.76	21.0673
5563.77	5.4	0.228	-0.262	2	0.1	0.213	2.75019	0.750191	0.000131728	0	0.000131728	0.76	21.0673
5564.75	5.46	0.228	-0.262	2	0.1	0.213	2.78075	0.780749	0.000131728	0	0.000131728	0.76	21.0673
5565.73	5.5	0.229	-0.262	2	0.1	0.213	2.80112	0.80112	0.000141137	0	0.000141137	0.76	21.0673
5566.83	5.56	0.231	-0.262	2	0.1	0.213	2.83168	0.831678	0.000159955	0	0.000159955	0.76	21.0673
5567.81	5.6	0.231	-0.262	2	0.1	0.213	2.85205	0.85205	0.000159955	0	0.000159955	0.755	20.9287
5568.8	5.66	0.233	-0.262	2	0.1	0.213	2.88261	0.882608	0.000178773	0	0.000178773	0.755	20.9287
5569.78	5.7	0.233	-0.262	2	0.1	0.213	2.90298	0.902979	0.000178773	0	0.000178773	0.755	20.9287
5570.77	5.76	0.233	-0.262	2	0.1	0.213	2.93354	0.933537	0.000178773	0	0.000178773	0.755	20.9287
5571.76	5.8	0.234	-0.262	2	0.1	0.213	2.95391	0.953909	0.000188182	0	0.000188182	0.755	20.9287
5572.73	5.86	0.236	-0.262	2	0.1	0.213	2.98447	0.984467	0.000207	0	0.000207	0.755	20.9287
5573.83	5.9	0.236	-0.262	2	0.1	0.213	3.00484	1.00484	0.000207	0	0.000207	0.755	20.9287
5574.81	5.96	0.236	-0.262	2	0.1	0.213	3.0354	1.0354	0.000207	0	0.000207	0.75	20.7901
5575.8	6	0.238	-0.262	2	0.1	0.213	3.05577	1.05577	0.000225819	0	0.000225819	0.75	20.7901
5576.78	6.06	0.238	-0.262	2	0.1	0.213	3.08633	1.08633	0.000225819	0	0.000225819	0.75	20.7901
5577.77	6.1	0.239	-0.262	2	0.1	0.213	3.1067	1.1067	0.000235228	0	0.000235228	0.75	20.7901
5578.76	6.16	0.239	-0.262	2	0.1	0.213	3.13725	1.13725	0.000235228	0	0.000235228	0.745	20.6515
5579.73	6.2	0.241	-0.262	2	0.1	0.213	3.15763	1.15763	0.000254046	0	0.000254046	0.745	20.6515
5580.83	6.26	0.243	-0.262	2	0.1	0.213	3.18818	1.18818	0.000272864	0	0.000272864	0.745	20.6515
5581.81	6.3	0.243	-0.262	2	0.1	0.213	3.20856	1.20856	0.000272864	0	0.000272864	0.745	20.6515
5582.8	6.36	0.243	-0.262	2	0.1	0.213	3.23911	1.23911	0.000272864	0	0.000272864	0.745	20.6515
5583.78	6.4	0.244	-0.262	2	0.1	0.213	3.25949	1.25949	0.000282273	0	0.000282273	0.74	20.5129
5584.77	6.46	0.246	-0.262	2	0.1	0.213	3.29004	1.29004	0.000301091	0	0.000301091	0.74	20.5129
5585.75	6.5	0.246	-0.262	2	0.1	0.213	3.31042	1.31042	0.000301091	0	0.000301091	0.74	20.5129
5586.74	6.56	0.248	-0.262	2	0.1	0.213	3.34097	1.34097	0.00031991	0	0.00031991	0.74	20.5129
5587.83	6.6	0.248	-0.262	2	0.1	0.213	3.36134	1.36134	0.00031991	0	0.00031991	0.74	20.5129
5588.81	6.66	0.249	-0.262	2	0.1	0.213	3.3919	1.3919	0.000329319	0	0.000329319	0.74	20.5129
5589.8	6.72	0.249	-0.262	2	0.1	0.213	3.42246	1.42246	0.000329319	0	0.000329319	0.74	20.5129
5590.78	6.76	0.251	-0.262	2	0.1	0.213	3.44283	1.44283	0.000348137	0	0.000348137	0.74	20.5129
5591.77	6.82	0.251	-0.262	2	0.1	0.213	3.47339	1.47339	0.000348137	0	0.000348137	0.74	20.5129
5592.76	6.86	0.253	-0.262	2	0.1	0.213	3.49376	1.49376	0.000366955	0	0.000366955	0.74	20.5129
5593.73	6.9	0.253	-0.262	2	0.1	0.213	3.51413	1.51413	0.000366955	0	0.000366955	0.735	20.3743
5594.83	6.96	0.254	-0.262	2	0.1	0.213	3.54469	1.54469	0.000376364	0	0.000376364	0.735	20.3743
5595.81	7.02	0.254	-0.262	2	0.1	0.213	3.57525	1.57525	0.000376364	0	0.000376364	0.735	20.3743
5596.8	7.06	0.256	-0.262	2	0.1	0.213	3.59562	1.59562	0.000395183	0	0.000395183	0.735	20.3743
5597.79	7.1	0.256	-0.262	2	0.1	0.213	3.61599	1.61599	0.000395183	0	0.000395183	0.735	20.3743
5598.77	7.16	0.258	-0.262	2	0.1	0.213	3.64655	1.64655	0.000414001	0	0.000414001	0.735	20.3743
5599.75	7.2	0.258	-0.262	2	0.1	0.213	3.66692	1.66692	0.000414001	0	0.000414001	0.735	20.3743
5600.84	7.26	0.259	-0.262	2	0.1	0.213	3.69748	1.69748	0.00042341	0	0.00042341	0.73	20.2357
5601.83	7.3	0.259	-0.262	2	0.1	0.213	3.71785	1.71785	0.00042341	0	0.00042341	0.73	20.2357
5602.81	7.36	0.261	-0.262	2	0.1	0.213	3.74841	1.74841	0.000442228	0	0.000442228	0.73	20.2357
5603.8	7.4	0.261	-0.262	2	0.1	0.213	3.76878	1.76878	0.000442228	0	0.000442228	0.73	20.2357
5604.79	7.46	0.263	-0.262	2	0.1	0.213	3.79934	1.79934	0.000461046	0	0.000461046	0.73	20.2357
5605.77	7.5	0.264	-0.262	2	0.1	0.213	3.81971	1.81971	0.000470455	0	0.000470455	0.73	20.2357
5606.76	7.56	0.264	-0.262	2	0.1	0.213	3.85027	1.85027	0.000470455	0	0.000470455	0.725	20.0971
5607.85	7.6	0.266	-0.262	2	0.1	0.213	3.87064	1.87064	0.000489274	0	0.000489274	0.725	20.0971
5608.83	7.66	0.268	-0.262	2	0.1	0.213	3.9012	1.9012	0.000508092	0	0.000508092	0.725	20.0971
5609.81	7.68	0.268	-0.262	2	0.1	0.213	3.91138	1.91138	0.000508092	0	0.000508092	0.725	20.0971
5610.8	7.7	0.268	-0.262	2	0.1	0.213	3.92157	1.92157	0.000508092	0	0.000508092	0.725	20.0971
5611.78	7.7	0.268	-0.262	2	0.1	0.213	3.92157	1.92157	0.000508092	0	0.000508092	0.72	19.9585
5612.77	7.7	0.269	-0.262	2	0.1	0.213	3.92157	1.92157	0.000517501	0	0.000517501	0.72	19.9585
5613.76	7.72	0.268	-0.262	2	0.1	0.213	3.93175	1.93175	0.000508092	0	0.000508092	0.72	19.9585
5614.84	7.72	0.269	-0.262	2	0.1	0.213	3.93175	1.93175	0.000517501	0	0.000517501	0.72	19.9585
5615.83	7.72	0.269	-0.262	2	0.1	0.213	3.93175	1.93175	0.000517501	0	0.000517501	0.72	19.9585
5616.81	7.74	0.269	-0.262	2	0.1	0.213	3.94194	1.94194	0.000517501	0	0.000517501	0.72	19.9585
5617.8	7.74	0.269	-0.262	2	0.1	0.213	3.94194	1.94194	0.000517501	0	0.000517501	0.72	19.9585
5618.78	7.74	0.269	-0.262	2	0.1	0.213	3.94194	1.94194	0.000517501	0	0.000517501	0.72	19.9585
5619.77	7.74	0.269	-0.262	2	0.1	0.213	3.94194	1.94194	0.000517501	0	0.000517501	0.72	19.9585
5620.75	7.74	0.269	-0.262	2	0.1	0.213	3.94194	1.94194	0.000517501	0	0.000517501	0.72	19.9585
5621.84	7.74	0.268	-0.262	2	0.1	0.213	3.94194	1.94194	0.000508092	0	0.000508092	0.72	19.9585
5622.83	7.74	0.269	-0.262	2	0.1	0.213	3.94194	1.94194	0.000517501	0	0.000517501	0.72	19.9585
5623.81	7.74	0.269	-0.262	2	0.1	0.213	3.94194	1.94194	0.000517501	0	0.000517501	0.72	19.9585
5624.8	7.76	0.269	-0.262	2	0.1	0.213	3.95213	1.95213	0.000517501	0	0.000517501	0.72	19.9585
5625.78	7.76	0.269	-0.262	2	0.1	0.213	3.95213	1.95213	0.000517501	0	0.000517501	0.72	19.9585
5626.77	7.76	0.269	-0.262	2	0.1	0.213	3.95213	1.95213	0.000517501	0	0.000517501	0.715	19.8199
5627.75	7.76	0.269	-0.262	2	0.1	0.213	3.95213	1.95213	0.000517501	0	0.000517501	0.72	19.9585
5628.85	7.78	0.271	-0.262	2	0.1	0.213	3.96231	1.96231	0.000536319	0	0.000536319	0.72	19.9585
5629.83	7.76	0.269	-0.262	2	0.1	0.213	3.95213	1.95213	0.000517501	0	0.000517501	0.72	19.9585
5630.81	7.78	0.269	-0.262	2	0.1	0.213	3.96231	1.96231	0.000517501	0	0.000517501	0.72	19.9585
5631.8	7.78	0.269	-0.262	2	0.1	0.213	3.96231	1.96231	0.000517501	0	0.000517501	0.715	19.8199
5632.78	7.78	0.269	-0.262	2	0.1	0.213	3.96231	1.96231	0.000517501	0	0.000517501	0.715	19.8199
5633.77	7.78	0.271	-0.262	2	0.1	0.213	3.96231	1.96231	0.000536319	0	0.000536319	0.72	19.9585
5634.75	7.8	0.269	-0.262	2	0.1	0.213	3.9725	1.9725	0.000517501	0	0.000517501	0.715	19.8199
5635.85	7.8	0.271	-0.262	2	0.1	0.213	3.9725	1.9725	0.000536319	0	0.000536319	0.72	19.9585
5636.83	7.8	0.271	-0.262	2	0.1	0.213	3.9725	1.9725	0.000536319	0	0.000536319	0.72	19.9585
5637.81	7.8	0.271	-0.262	2	0.1	0.213	3.9725	1.9725	0.000536319	0	0.000536319	0.72	19.9585
5638.8	7.82	0.271	-0.262	2	0.1	0.213	3.98268	1.98268	0.000536319	0	0.000536319	0.72	19.9585
5639.78	7.8	0.271	-0.262	2	0.1	0.213	3.9725	1.9725	0.000536319	0	0.000536319	0.72	19.9585
5640.77	7.82	0.271	-0.262	2	0.1	0.213	3.98268	1.98268	0.000536319	0	0.000536319	0.72	19.9585
5641.75	7.82	0.271	-0.262	2	0.1	0.213	3.98268	1.98268	0.000536319	0	0.000536319	0.715	19.8199
5642.84	7.82	0.271	-0.262	2	0.1	0.213	3.98268	1.98268	0.000536319	0	0.000536319	0.72	19.9585
5643.83	7.82	0.271	-0.262	2	0.1	0.213	3.98268	1.98268	0.000536319	0	0.000536319	0.715	19.8199
5644.81	7.82	0.271	-0.262	2	0.1	0.213	3.98268	1.98268	0.000536319	0	0.000536319	0.715	19.8199
5645.8	7.82	0.273	-0.261	2	0.1	0.213	3.98268	1.98268	0.000555137	6.3662e-06	0.00056787	0.715	19.8199
5646.78	7.82	0.271	-0.261	2	0.1	0.213	3.98268	1.98268	0.000536319	6.3662e-06	0.000549052	0.715	19.8199
5647.77	7.82	0.271	-0.261	2	0.1	0.213	3.98268	1.98268	0.000536319	6.3662e-06	0.000549052	0.715	19.8199
5648.76	7.84	0.271	-0.261	2	0.1	0.213	3.99287	1.99287	0.000536319	6.3662e-06	0.000549052	0.715	19.8199
5649.85	7.84	0.271	-0.261	2	0.1	0.213	3.99287	1.99287	0.000536319	6.3662e-06	0.000549052	0.715	19.8199
5650.83	7.84	0.271	-0.261	2	0.1	0.213	3.99287	1.99287	0.000536319	6.3662e-06	0.000549052	0.715	19.8199
5651.81	7.84	0.271	-0.261	2	0.1	0.213	3.99287	1.99287	0.000536319	6.3662e-06	0.000549052	0.715	19.8199
5652.8	7.84	0.271	-0.261	2	0.1	0.213	3.99287	1.99287	0.000536319	6.3662e-06	0.000549052	0.715	19.8199
5653.78	7.84	0.271	-0.261	2	0.1	0.213	3.99287	1.99287	0.000536319	6.3662e-06	0.000549052	0.715	19.8199
5654.77	7.84	0.271	-0.261	2	0.1	0.213	3.99287	1.99287	0.000536319	6.3662e-06	0.000549052	0.715	19.8199
5655.75	7.84	0.273	-0.261	2	0.1	0.213	3.99287	1.99287	0.000555137	6.3662e-06	0.00056787	0.715	19.8199
5656.84	7.84	0.271	-0.261	2	0.1	0.213	3.99287	1.99287	0.000536319	6.3662e-06	0.000549052	0.715	19.8199
5657.83	7.84	0.271	-0.261	2	0.1	0.213	3.99287	1.99287	0.000536319	6.3662e-06	0.000549052	0.715	19.8199
5658.81	7.84	0.273	-0.261	2	0.1	0.213	3.99287	1.99287	0.000555137	6.3662e-06	0.00056787	0.715	19.8199
5659.8	7.84	0.273	-0.261	2	0.1	0.213	3.99287	1.99287	0.000555137	6.3662e-06	0.00056787	0.715	19.8199
5660.78	7.84	0.271	-0.261	2	0.1	0.213	3.99287	1.99287	0.000536319	6.3662e-06	0.000549052	0.715	19.8199
5661.77	7.84	0.273	-0.261	2	0.1	0.213	3.99287	1.99287	0.000555137	6.3662e-06	0.00056787	0.715	19.8199
5662.75	7.84	0.271	-0.261	2	0.1	0.213	3.99287	1.99287	0.000536319	6.3662e-06	0.000549052	0.715	19.8199
5663.85	7.84	0.273	-0.261	2	0.1	0.213	3.99287	1.99287	0.000555137	6.3662e-06	0.00056787	0.715	19.8199
5664.83	7.84	0.273	-0.261	2	0.1	0.213	3.99287	1.99287	0.000555137	6.3662e-06	0.00056787	0.715	19.8199
5665.81	7.84	0.273	-0.261	2	0.1	0.213	3.99287	1.99287	0.000555137	6.3662e-06	0.00056787	0.715	19.8199
5666.8	7.84	0.273	-0.261	2	0.1	0.213	3.99287	1.99287	0.000555137	6.3662e-06	0.00056787	0.715	19.8199
5667.78	7.84	0.273	-0.261	2	0.1	0.213	3.99287	1.99287	0.000555137	6.3662e-06	0.00056787	0.715	19.8199
5668.77	7.84	0.273	-0.261	2	0.1	0.213	3.99287	1.99287	0.000555137	6.3662e-06	0.00056787	0.715	19.8199
5669.75	7.84	0.273	-0.261	2	0.1	0.213	3.99287	1.99287	0.000555137	6.3662e-06	0.00056787	0.715	19.8199
5670.84	7.84	0.273	-0.261	2	0.1	0.213	3.99287	1.99287	0.000555137	6.3662e-06	0.00056787	0.715	19.8199
5671.83	7.84	0.273	-0.261	2	0.1	0.213	3.99287	1.99287	0.000555137	6.3662e-06	0.00056787	0.715	19.8199
5672.81	7.86	0.273	-0.261	2	0.1	0.213	4.00306	2.00306	0.000555137	6.3662e-06	0.00056787	0.715	19.8199
5673.8	7.86	0.273	-0.261	2	0.1	0.213	4.00306	2.00306	0.000555137	6.3662e-06	0.00056787	0.715	19.8199
5674.79	7.86	0.273	-0.261	2	0.1	0.213	4.00306	2.00306	0.000555137	6.3662e-06	0.00056787	0.715	19.8199
5675.77	7.86	0.273	-0.261	2	0.1	0.213	4.00306	2.00306	0.000555137	6.3662e-06	0.00056787	0.715	19.8199
5676.76	7.88	0.273	-0.261	2	0.1	0.213	4.01324	2.01324	0.000555137	6.3662e-06	0.00056787	0.715	19.8199
5677.84	7.86	0.273	-0.261	2	0.1	0.213	4.00306	2.00306	0.000555137	6.3662e-06	0.00056787	0.715	19.8199
5678.83	7.86	0.273	-0.261	2	0.1	0.213	4.00306	2.00306	0.000555137	6.3662e-06	0.00056787	0.715	19.8199
5679.81	7.86	0.273	-0.261	2	0.1	0.213	4.00306	2.00306	0.000555137	6.3662e-06	0.00056787	0.715	19.8199
5680.8	7.86	0.273	-0.261	2	0.1	0.213	4.00306	2.00306	0.000555137	6.3662e-06	0.00056787	0.715	19.8199
5681.79	7.86	0.273	-0.261	2	0.1	0.213	4.00306	2.00306	0.000555137	6.3662e-06	0.00056787	0.715	19.8199
5682.77	7.86	0.273	-0.261	2	0.1	0.213	4.00306	2.00306	0.000555137	6.3662e-06	0.00056787	0.715	19.8199
5683.76	7.84	0.273	-0.261	2	0.1	0.213	3.99287	1.99287	0.000555137	6.3662e-06	0.00056787	0.715	19.8199
5684.85	7.84	0.273	-0.26	2	0.1	0.213	3.99287	1.99287	0.000555137	1.27324e-05	0.000580602	0.715	19.8199
5685.83	7.84	0.273	-0.26	2	0.1	0.213	3.99287	1.99287	0.000555137	1.27324e-05	0.000580602	0.715	19.8199
5686.81	7.84	0.273	-0.26	2	0.1	0.213	3.99287	1.99287	0.000555137	1.27324e-05	0.000580602	0.71	19.6813
5687.8	7.84	0.273	-0.26	2	0.1	0.213	3.99287	1.99287	0.000555137	1.27324e-05	0.000580602	0.71	19.6813
5688.78	7.84	0.273	-0.26	2	0.1	0.213	3.99287	1.99287	0.000555137	1.27324e-05	0.000580602	0.71	19.6813
5689.77	7.84	0.273	-0.26	2	0.1	0.213	3.99287	1.99287	0.000555137	1.27324e-05	0.000580602	0.715	19.8199
5690.75	7.84	0.273	-0.26	2	0.1	0.213	3.99287	1.99287	0.000555137	1.27324e-05	0.000580602	0.71	19.6813
5691.85	7.84	0.273	-0.26	2	0.1	0.213	3.99287	1.99287	0.000555137	1.27324e-05	0.000580602	0.71	19.6813
5692.83	7.84	0.273	-0.26	2	0.1	0.213	3.99287	1.99287	0.000555137	1.27324e-05	0.000580602	0.71	19.6813
5693.81	7.84	0.273	-0.26	2	0.1	0.213	3.99287	1.99287	0.000555137	1.27324e-05	0.000580602	0.71	19.6813
5694.8	7.84	0.273	-0.26	2	0.1	0.213	3.99287	1.99287	0.000555137	1.27324e-05	0.000580602	0.71	19.6813
5695.78	7.84	0.273	-0.26	2	0.1	0.213	3.99287	1.99287	0.000555137	1.27324e-05	0.000580602	0.71	19.6813
5696.77	7.84	0.273	-0.26	2	0.1	0.213	3.99287	1.99287	0.000555137	1.27324e-05	0.000580602	0.71	19.6813
5697.75	7.84	0.273	-0.26	2	0.1	0.213	3.99287	1.99287	0.000555137	1.27324e-05	0.000580602	0.71	19.6813
5698.85	7.84	0.273	-0.26	2	0.1	0.213	3.99287	1.99287	0.000555137	1.27324e-05	0.000580602	0.71	19.6813
5699.83	7.84	0.273	-0.26	2	0.1	0.213	3.99287	1.99287	0.000555137	1.27324e-05	0.000580602	0.71	19.6813
5700.81	7.84	0.273	-0.26	2	0.1	0.213	3.99287	1.99287	0.000555137	1.27324e-05	0.000580602	0.71	19.6813
5701.8	7.84	0.273	-0.26	2	0.1	0.213	3.99287	1.99287	0.000555137	1.27324e-05	0.000580602	0.71	19.6813
5702.78	7.84	0.273	-0.26	2	0.1	0.213	3.99287	1.99287	0.000555137	1.27324e-05	0.000580602	0.71	19.6813
5703.77	7.84	0.273	-0.26	2	0.1	0.213	3.99287	1.99287	0.000555137	1.27324e-05	0.000580602	0.71	19.6813
5704.75	7.84	0.273	-0.26	2	0.1	0.213	3.99287	1.99287	0.000555137	1.27324e-05	0.000580602	0.71	19.6813
5705.84	7.84	0.273	-0.26	2	0.1	0.213	3.99287	1.99287	0.000555137	1.27324e-05	0.000580602	0.71	19.6813
5706.83	7.84	0.273	-0.26	2	0.1	0.213	3.99287	1.99287	0.000555137	1.27324e-05	0.000580602	0.71	19.6813
5707.81	7.84	0.273	-0.26	2	0.1	0.213	3.99287	1.99287	0.000555137	1.27324e-05	0.000580602	0.71	19.6813
5708.8	7.84	0.273	-0.26	2	0.1	0.213	3.99287	1.99287	0.000555137	1.27324e-05	0.000580602	0.71	19.6813
5709.78	7.84	0.273	-0.26	2	0.1	0.213	3.99287	1.99287	0.000555137	1.27324e-05	0.000580602	0.71	19.6813
5710.77	7.84	0.273	-0.26	2	0.1	0.213	3.99287	1.99287	0.000555137	1.27324e-05	0.000580602	0.71	19.6813
5711.76	7.84	0.273	-0.26	2	0.1	0.213	3.99287	1.99287	0.000555137	1.27324e-05	0.000580602	0.71	19.6813
5712.85	7.84	0.273	-0.26	2	0.1	0.213	3.99287	1.99287	0.000555137	1.27324e-05	0.000580602	0.71	19.6813
5713.83	7.84	0.274	-0.26	2	0.1	0.213	3.99287	1.99287	0.000564546	1.27324e-05	0.000590011	0.71	19.6813
5714.81	7.84	0.273	-0.26	2	0.1	0.213	3.99287	1.99287	0.000555137	1.27324e-05	0.000580602	0.71	19.6813
5715.8	7.84	0.273	-0.26	2	0.1	0.213	3.99287	1.99287	0.000555137	1.27324e-05	0.000580602	0.71	19.6813
5716.78	7.86	0.274	-0.26	2	0.1	0.213	4.00306	2.00306	0.000564546	1.27324e-05	0.000590011	0.71	19.6813
5717.77	7.86	0.274	-0.26	2	0.1	0.213	4.00306	2.00306	0.000564546	1.27324e-05	0.000590011	0.71	19.6813
5718.75	7.86	0.273	-0.26	2	0.1	0.213	4.00306	2.00306	0.000555137	1.27324e-05	0.000580602	0.71	19.6813
5719.85	7.84	0.273	-0.26	2	0.1	0.213	3.99287	1.99287	0.000555137	1.27324e-05	0.000580602	0.71	19.6813
5720.83	7.86	0.274	-0.26	2	0.1	0.213	4.00306	2.00306	0.000564546	1.27324e-05	0.000590011	0.71	19.6813
5721.81	7.84	0.274	-0.26	2	0.1	0.213	3.99287	1.99287	0.000564546	1.27324e-05	0.000590011	0.71	19.6813
5722.8	7.86	0.273	-0.26	2	0.1	0.213	4.00306	2.00306	0.000555137	1.27324e-05	0.000580602	0.71	19.6813
5723.78	7.84	0.274	-0.26	2	0.1	0.213	3.99287	1.99287	0.000564546	1.27324e-05	0.000590011	0.71	19.6813
5724.77	7.84	0.274	-0.259	2	0.1	0.213	3.99287	1.99287	0.000564546	1.90986e-05	0.000602744	0.71	19.6813
5725.75	7.84	0.273	-0.259	2	0.1	0.213	3.99287	1.99287	0.000555137	1.90986e-05	0.000593335	0.71	19.6813
5726.85	7.86	0.274	-0.259	2	0.1	0.213	4.00306	2.00306	0.000564546	1.90986e-05	0.000602744	0.71	19.6813
5727.83	7.86	0.274	-0.259	2	0.1	0.213	4.00306	2.00306	0.000564546	1.90986e-05	0.000602744	0.71	19.6813
5728.81	7.86	0.274	-0.259	2	0.1	0.213	4.00306	2.00306	0.000564546	1.90986e-05	0.000602744	0.71	19.6813
5729.8	7.86	0.274	-0.259	2	0.1	0.213	4.00306	2.00306	0.000564546	1.90986e-05	0.000602744	0.71	19.6813
5730.79	7.86	0.274	-0.259	2	0.1	0.213	4.00306	2.00306	0.000564546	1.90986e-05	0.000602744	0.71	19.6813
5731.77	7.86	0.274	-0.259	2	0.1	0.213	4.00306	2.00306	0.000564546	1.90986e-05	0.000602744	0.71	19.6813
5732.75	7.86	0.274	-0.259	2	0.1	0.213	4.00306	2.00306	0.000564546	1.90986e-05	0.000602744	0.71	19.6813
5733.85	7.84	0.274	-0.259	2	0.1	0.213	3.99287	1.99287	0.000564546	1.90986e-05	0.000602744	0.71	19.6813
5734.83	7.84	0.274	-0.259	2	0.1	0.213	3.99287	1.99287	0.000564546	1.90986e-05	0.000602744	0.71	19.6813
5735.81	7.84	0.274	-0.259	2	0.1	0.213	3.99287	1.99287	0.000564546	1.90986e-05	0.000602744	0.71	19.6813
5736.8	7.84	0.274	-0.259	2	0.1	0.213	3.99287	1.99287	0.000564546	1.90986e-05	0.000602744	0.71	19.6813
5737.78	7.84	0.274	-0.259	2	0.1	0.213	3.99287	1.99287	0.000564546	1.90986e-05	0.000602744	0.71	19.6813
5738.77	7.84	0.274	-0.259	2	0.1	0.213	3.99287	1.99287	0.000564546	1.90986e-05	0.000602744	0.71	19.6813
5739.76	7.84	0.274	-0.259	2	0.1	0.213	3.99287	1.99287	0.000564546	1.90986e-05	0.000602744	0.71	19.6813
5740.85	7.84	0.274	-0.259	2	0.1	0.213	3.99287	1.99287	0.000564546	1.90986e-05	0.000602744	0.71	19.6813
5741.83	7.84	0.274	-0.259	2	0.1	0.213	3.99287	1.99287	0.000564546	1.90986e-05	0.000602744	0.71	19.6813
5742.81	7.84	0.274	-0.259	2	0.1	0.213	3.99287	1.99287	0.000564546	1.90986e-05	0.000602744	0.71	19.6813
5743.8	7.84	0.274	-0.259	2	0.1	0.213	3.99287	1.99287	0.000564546	1.90986e-05	0.000602744	0.71	19.6813
5744.78	7.84	0.274	-0.259	2	0.1	0.213	3.99287	1.99287	0.000564546	1.90986e-05	0.000602744	0.71	19.6813
5745.77	7.84	0.274	-0.259	2	0.1	0.213	3.99287	1.99287	0.000564546	1.90986e-05	0.000602744	0.71	19.6813
5746.75	7.84	0.274	-0.259	2	0.1	0.213	3.99287	1.99287	0.000564546	1.90986e-05	0.000602744	0.71	19.6813
5747.85	7.84	0.274	-0.259	2	0.1	0.213	3.99287	1.99287	0.000564546	1.90986e-05	0.000602744	0.71	19.6813
5748.83	7.84	0.274	-0.259	2	0.1	0.213	3.99287	1.99287	0.000564546	1.90986e-05	0.000602744	0.71	19.6813
5749.81	7.84	0.274	-0.259	2	0.1	0.213	3.99287	1.99287	0.000564546	1.90986e-05	0.000602744	0.71	19.6813
5750.8	7.84	0.274	-0.259	2	0.1	0.213	3.99287	1.99287	0.000564546	1.90986e-05	0.000602744	0.71	19.6813
5751.78	7.84	0.274	-0.259	2	0.1	0.213	3.99287	1.99287	0.000564546	1.90986e-05	0.000602744	0.71	19.6813
5752.77	7.84	0.274	-0.259	2	0.1	0.213	3.99287	1.99287	0.000564546	1.90986e-05	0.000602744	0.71	19.6813
5753.75	7.84	0.274	-0.259	2	0.1	0.213	3.99287	1.99287	0.000564546	1.90986e-05	0.000602744	0.71	19.6813
5754.84	7.84	0.274	-0.259	2	0.1	0.213	3.99287	1.99287	0.000564546	1.90986e-05	0.000602744	0.71	19.6813
5755.83	7.84	0.274	-0.259	2	0.1	0.213	3.99287	1.99287	0.000564546	1.90986e-05	0.000602744	0.71	19.6813
5756.81	7.84	0.274	-0.259	2	0.1	0.213	3.99287	1.99287	0.000564546	1.90986e-05	0.000602744	0.71	19.6813
5757.8	7.84	0.274	-0.259	2	0.1	0.213	3.99287	1.99287	0.000564546	1.90986e-05	0.000602744	0.71	19.6813
5758.78	7.84	0.274	-0.259	2	0.1	0.213	3.99287	1.99287	0.000564546	1.90986e-05	0.000602744	0.71	19.6813
5759.77	7.84	0.274	-0.259	2	0.1	0.213	3.99287	1.99287	0.000564546	1.90986e-05	0.000602744	0.71	19.6813
5760.76	7.84	0.274	-0.259	2	0.1	0.213	3.99287	1.99287	0.000564546	1.90986e-05	0.000602744	0.71	19.6813
5761.84	7.84	0.274	-0.259	2	0.1	0.213	3.99287	1.99287	0.000564546	1.90986e-05	0.000602744	0.71	19.6813
5762.83	7.84	0.276	-0.259	2	0.1	0.213	3.99287	1.99287	0.000583365	1.90986e-05	0.000621562	0.71	19.6813
5763.81	7.84	0.274	-0.259	2	0.1	0.213	3.99287	1.99287	0.000564546	1.90986e-05	0.000602744	0.71	19.6813
5764.8	7.84	0.274	-0.259	2	0.1	0.213	3.99287	1.99287	0.000564546	1.90986e-05	0.000602744	0.71	19.6813
5765.78	7.84	0.276	-0.259	2	0.1	0.213	3.99287	1.99287	0.000583365	1.90986e-05	0.000621562	0.71	19.6813
5766.77	7.86	0.276	-0.259	2	0.1	0.213	4.00306	2.00306	0.000583365	1.90986e-05	0.000621562	0.71	19.6813
5767.75	7.84	0.276	-0.259	2	0.1	0.213	3.99287	1.99287	0.000583365	1.90986e-05	0.000621562	0.71	19.6813
5768.85	7.86	0.274	-0.259	2	0.1	0.213	4.00306	2.00306	0.000564546	1.90986e-05	0.000602744	0.71	19.6813
5769.83	7.84	0.274	-0.258	2	0.1	0.213	3.99287	1.99287	0.000564546	2.54648e-05	0.000615476	0.71	19.6813
5770.81	7.84	0.276	-0.258	2	0.1	0.213	3.99287	1.99287	0.000583365	2.54648e-05	0.000634294	0.71	19.6813
5771.8	7.84	0.276	-0.258	2	0.1	0.213	3.99287	1.99287	0.000583365	2.54648e-05	0.000634294	0.71	19.6813
5772.79	7.84	0.276	-0.258	2	0.1	0.213	3.99287	1.99287	0.000583365	2.54648e-05	0.000634294	0.71	19.6813
5773.77	7.84	0.274	-0.258	2	0.1	0.213	3.99287	1.99287	0.000564546	2.54648e-05	0.000615476	0.71	19.6813
5774.75	7.84	0.276	-0.258	2	0.1	0.213	3.99287	1.99287	0.000583365	2.54648e-05	0.000634294	0.71	19.6813
5775.84	7.84	0.276	-0.258	2.05	0.1	0.213	3.99287	1.94287	0.000583365	2.54648e-05	0.000634294	0.705	19.5427
5776.83	7.84	0.276	-0.257	2.065	0.1	0.213	3.99287	1.92787	0.000583365	3.1831e-05	0.000647027	0.71	19.6813
5777.81	7.84	0.276	-0.257	2.105	0.1	0.213	3.99287	1.88787	0.000583365	3.1831e-05	0.000647027	0.705	19.5427
5778.8	7.84	0.276	-0.256	2.155	0.1	0.213	3.99287	1.83787	0.000583365	3.81972e-05	0.000659759	0.705	19.5427
5779.78	7.84	0.274	-0.254	2.225	0.1	0.213	3.99287	1.76787	0.000564546	5.09296e-05	0.000666406	0.705	19.5427
5780.77	7.84	0.276	-0.252	2.295	0.1	0.213	3.99287	1.69787	0.000583365	6.3662e-05	0.000710689	0.705	19.5427
5781.76	7.84	0.276	-0.25	2.355	0.1	0.213	3.99287	1.63787	0.000583365	7.63944e-05	0.000736153	0.705	19.5427
5782.84	7.84	0.276	-0.247	2.415	0.1	0.213	3.99287	1.57787	0.000583365	9.5493e-05	0.000774351	0.705	19.5427
5783.83	7.84	0.276	-0.245	2.465	0.1	0.213	3.99287	1.52787	0.000583365	0.000108225	0.000799815	0.7	19.4041
5784.81	7.84	0.276	-0.243	2.525	0.1	0.213	3.99287	1.46787	0.000583365	0.000120958	0.00082528	0.7	19.4041
5785.8	7.84	0.276	-0.241	2.58	0.1	0.213	3.99287	1.41287	0.000583365	0.00013369	0.000850745	0.695	19.2655
5786.78	7.86	0.276	-0.239	2.625	0.1	0.213	4.00306	1.37806	0.000583365	0.000146423	0.00087621	0.695	19.2655
5787.77	7.84	0.276	-0.238	2.67	0.1	0.213	3.99287	1.32287	0.000583365	0.000152789	0.000888942	0.69	19.1269
5788.76	7.84	0.276	-0.237	2.71	0.1	0.213	3.99287	1.28287	0.000583365	0.000159155	0.000901675	0.685	18.9883
5789.85	7.84	0.276	-0.235	2.76	0.1	0.213	3.99287	1.23287	0.000583365	0.000171887	0.000927139	0.685	18.9883
5790.83	7.86	0.276	-0.234	2.81	0.1	0.213	4.00306	1.19306	0.000583365	0.000178254	0.000939872	0.68	18.8497
5791.81	7.84	0.278	-0.232	2.86	0.1	0.213	3.99287	1.13287	0.000602183	0.000190986	0.000984155	0.675	18.7111
5792.8	7.84	0.276	-0.231	2.905	0.1	0.213	3.99287	1.08787	0.000583365	0.000197352	0.000978069	0.675	18.7111
5793.79	7.84	0.276	-0.229	2.96	0.1	0.213	3.99287	1.03287	0.000583365	0.000210085	0.00100353	0.67	18.5725
5794.77	7.84	0.276	-0.228	3.005	0.1	0.213	3.99287	0.98787	0.000583365	0.000216451	0.00101627	0.67	18.5725
5795.75	7.84	0.276	-0.226	3.05	0.1	0.213	3.99287	0.94287	0.000583365	0.000229183	0.00104173	0.665	18.4339
5796.84	7.84	0.278	-0.224	3.105	0.1	0.213	3.99287	0.88787	0.000602183	0.000241916	0.00108601	0.66	18.2953
5797.83	7.84	0.276	-0.222	3.155	0.1	0.213	3.99287	0.83787	0.000583365	0.000254648	0.00109266	0.66	18.2953
5798.81	7.84	0.276	-0.22	3.2	0.1	0.213	3.99287	0.79287	0.000583365	0.00026738	0.00111813	0.655	18.1566
5799.8	7.84	0.278	-0.218	3.26	0.1	0.213	3.99287	0.73287	0.000602183	0.000280113	0.00116241	0.655	18.1566
5800.78	7.84	0.276	-0.215	3.305	0.1	0.213	3.99287	0.68787	0.000583365	0.000299211	0.00118179	0.65	18.018
5801.77	7.84	0.276	-0.213	3.36	0.1	0.213	3.99287	0.63287	0.000583365	0.000311944	0.00120725	0.645	17.8794
5802.75	7.84	0.276	-0.211	3.405	0.1	0.213	3.99287	0.58787	0.000583365	0.000324676	0.00123272	0.645	17.8794
5803.84	7.84	0.278	-0.209	3.46	0.1	0.213	3.99287	0.53287	0.000602183	0.000337408	0.001277	0.635	17.6022
5804.83	7.84	0.278	-0.207	3.51	0.1	0.213	3.99287	0.48287	0.000602183	0.000350141	0.00130246	0.635	17.6022
5805.81	7.84	0.276	-0.205	3.55	0.1	0.213	3.99287	0.44287	0.000583365	0.000362873	0.00130911	0.63	17.4636
5806.8	7.84	0.276	-0.202	3.54	0.1	0.213	3.99287	0.45287	0.000583365	0.000381972	0.00134731	0.625	17.325
5807.78	7.84	0.278	-0.197	3.66	0.1	0.213	3.99287	0.33287	0.000602183	0.000413803	0.00142979	0.625	17.325
5808.77	7.84	0.278	-0.194	3.715	0.1	0.213	3.99287	0.27787	0.000602183	0.000432901	0.00146799	0.62	17.1864
5809.75	7.84	0.276	-0.192	3.765	0.1	0.213	3.99287	0.22787	0.000583365	0.000445634	0.00147463	0.615	17.0478
5810.84	7.84	0.276	-0.19	3.815	0.1	0.213	3.99287	0.17787	0.000583365	0.000458366	0.0015001	0.61	16.9092
5811.83	7.84	0.278	-0.188	3.865	0.1	0.213	3.99287	0.12787	0.000602183	0.000471099	0.00154438	0.605	16.7706
5812.81	7.86	0.278	-0.186	3.91	0.1	0.213	4.00306	0.0930558	0.000602183	0.000483831	0.00156984	0.6	16.632
5813.8	7.86	0.276	-0.184	3.96	0.1	0.213	4.00306	0.0430558	0.000583365	0.000496563	0.00157649	0.6	16.632
5814.78	7.86	0.276	-0.182	4.01	0.1	0.213	4.00306	-0.00694423	0.000583365	0.000509296	0.00160196	0.59	16.3548
5815.77	7.84	0.276	-0.18	4.06	0.1	0.213	3.99287	-0.0671301	0.000583365	0.000522028	0.00162742	0.59	16.3548
5816.76	7.84	0.276	-0.178	4.11	0.1	0.213	3.99287	-0.11713	0.000583365	0.000534761	0.00165289	0.58	16.0776
5817.85	7.84	0.276	-0.176	4.16	0.1	0.213	3.99287	-0.16713	0.000583365	0.000547493	0.00167835	0.58	16.0776
5818.83	7.84	0.276	-0.173	4.21	0.1	0.213	3.99287	-0.21713	0.000583365	0.000566592	0.00171655	0.575	15.939
5819.81	7.84	0.276	-0.172	4.255	0.1	0.213	3.99287	-0.26213	0.000583365	0.000572958	0.00172928	0.57	15.8004
5820.8	7.84	0.278	-0.169	4.31	0.1	0.213	3.99287	-0.31713	0.000602183	0.000592056	0.0017863	0.565	15.6618
5821.79	7.84	0.276	-0.167	4.355	0.1	0.213	3.99287	-0.36213	0.000583365	0.000604789	0.00179294	0.56	15.5232
5822.77	7.84	0.278	-0.165	4.41	0.1	0.213	3.99287	-0.41713	0.000602183	0.000617521	0.00183723	0.56	15.5232
5823.75	7.84	0.276	-0.162	4.455	0.1	0.213	3.99287	-0.46213	0.000583365	0.00063662	0.0018566	0.555	15.3846
5824.84	7.84	0.278	-0.16	4.505	0.1	0.213	3.99287	-0.51213	0.000602183	0.000649352	0.00190089	0.55	15.246
5825.83	7.84	0.276	-0.158	4.56	0.1	0.213	3.99287	-0.56713	0.000583365	0.000662085	0.00190753	0.545	15.1074
5826.81	7.84	0.278	-0.156	4.605	0.1	0.213	3.99287	-0.61213	0.000602183	0.000674817	0.00195182	0.545	15.1074
5827.8	7.84	0.276	-0.154	4.655	0.1	0.213	3.99287	-0.66213	0.000583365	0.000687549	0.00195846	0.535	14.8302
5828.78	7.84	0.276	-0.151	4.705	0.1	0.213	3.99287	-0.71213	0.000583365	0.000706648	0.00199666	0.535	14.8302
5829.77	7.84	0.278	-0.149	4.76	0.1	0.213	3.99287	-0.76713	0.000602183	0.00071938	0.00204094	0.53	14.6916
5830.75	7.84	0.276	-0.147	4.8	0.1	0.213	3.99287	-0.80713	0.000583365	0.000732113	0.00204759	0.53	14.6916
5831.85	7.84	0.278	-0.145	4.845	0.1	0.213	3.99287	-0.85213	0.000602183	0.000744845	0.00209187	0.525	14.553
5832.83	7.84	0.276	-0.142	4.9	0.1	0.213	3.99287	-0.90713	0.000583365	0.000763944	0.00211125	0.52	14.4144
5833.81	7.84	0.278	-0.139	4.97	0.1	0.213	3.99287	-0.97713	0.000602183	0.000783042	0.00216827	0.52	14.4144
5834.8	7.84	0.276	-0.136	5.015	0.1	0.213	3.99287	-1.02213	0.000583365	0.000802141	0.00218765	0.515	14.2758
5835.78	7.84	0.278	-0.135	5.06	0.1	0.213	3.99287	-1.06713	0.000602183	0.000808507	0.0022192	0.51	14.1372
5836.77	7.84	0.276	-0.132	5.115	0.1	0.213	3.99287	-1.12213	0.000583365	0.000827606	0.00223858	0.505	13.9986
5837.75	7.84	0.276	-0.13	5.16	0.1	0.213	3.99287	-1.16713	0.000583365	0.000840338	0.00226404	0.505	13.9986
5838.85	7.84	0.276	-0.128	5.215	0.1	0.213	3.99287	-1.22213	0.000583365	0.00085307	0.00228951	0.5	13.86
5839.83	7.84	0.278	-0.126	5.25	0.1	0.213	3.99287	-1.25713	0.000602183	0.000865803	0.00233379	0.495	13.7214
5840.81	7.84	0.276	-0.124	5.3	0.1	0.213	3.99287	-1.30713	0.000583365	0.000878535	0.00234044	0.49	13.5828
5841.8	7.84	0.278	-0.121	5.36	0.1	0.213	3.99287	-1.36713	0.000602183	0.000897634	0.00239745	0.485	13.4442
5842.78	7.86	0.278	-0.12	5.405	0.1	0.213	4.00306	-1.40194	0.000602183	0.000904	0.00241018	0.485	13.4442
5843.77	7.84	0.278	-0.117	5.46	0.1	0.213	3.99287	-1.46713	0.000602183	0.000923099	0.00244838	0.48	13.3056
5844.75	7.86	0.276	-0.115	5.5	0.1	0.213	4.00306	-1.49694	0.000583365	0.000935831	0.00245503	0.475	13.167
5845.85	7.84	0.276	-0.113	5.56	0.1	0.213	3.99287	-1.56713	0.000583365	0.000948563	0.00248049	0.475	13.167
5846.83	7.84	0.276	-0.11	5.61	0.1	0.213	3.99287	-1.61713	0.000583365	0.000967662	0.00251869	0.47	13.0284
5847.81	7.84	0.276	-0.108	5.655	0.1	0.213	3.99287	-1.66213	0.000583365	0.000980394	0.00254415	0.465	12.8898
5848.8	7.84	0.276	-0.106	5.7	0.1	0.213	3.99287	-1.70713	0.000583365	0.000993127	0.00256962	0.465	12.8898
5849.78	7.84	0.278	-0.104	5.755	0.1	0.213	3.99287	-1.76213	0.000602183	0.00100586	0.0026139	0.46	12.7512
5850.77	7.84	0.276	-0.101	5.805	0.1	0.213	3.99287	-1.81213	0.000583365	0.00102496	0.00263328	0.455	12.6126
5851.76	7.84	0.278	-0.099	5.86	0.1	0.213	3.99287	-1.86713	0.000602183	0.00103769	0.00267756	0.45	12.474
5852.85	7.84	0.278	-0.097	5.905	0.1	0.213	3.99287	-1.91213	0.000602183	0.00105042	0.00270303	0.45	12.474
5853.83	7.84	0.278	-0.094	5.965	0.1	0.213	3.99287	-1.97213	0.000602183	0.00106952	0.00274123	0.445	12.3354
5854.81	7.84	0.276	-0.092	6.005	0.1	0.213	3.99287	-2.01213	0.000583365	0.00108225	0.00274787	0.445	12.3354
5855.8	7.84	0.276	-0.09	6.06	0.1	0.213	3.99287	-2.06713	0.000583365	0.00109499	0.00277334	0.44	12.1968
5856.79	7.84	0.278	-0.088	6.11	0.1	0.213	3.99287	-2.11713	0.000602183	0.00110772	0.00281762	0.435	12.0582
5857.77	7.84	0.276	-0.085	6.16	0.1	0.213	3.99287	-2.16713	0.000583365	0.00112682	0.002837	0.43	11.9196
5858.76	7.84	0.278	-0.083	6.205	0.1	0.213	3.99287	-2.21213	0.000602183	0.00113955	0.00288128	0.43	11.9196
5859.84	7.84	0.276	-0.081	6.26	0.1	0.213	3.99287	-2.26713	0.000583365	0.00115228	0.00288793	0.425	11.781
5860.83	7.84	0.278	-0.079	6.31	0.1	0.213	3.99287	-2.31713	0.000602183	0.00116501	0.00293221	0.42	11.6424
5861.81	7.84	0.278	-0.077	6.355	0.1	0.213	3.99287	-2.36213	0.000602183	0.00117775	0.00295768	0.42	11.6424
5862.8	7.84	0.278	-0.075	6.405	0.1	0.213	3.99287	-2.41213	0.000602183	0.00119048	0.00298314	0.415	11.5038
5863.79	7.84	0.278	-0.073	6.46	0.1	0.213	3.99287	-2.46713	0.000602183	0.00120321	0.00300861	0.415	11.5038
5864.77	7.86	0.276	-0.071	6.5	0.1	0.213	4.00306	-2.49694	0.000583365	0.00121594	0.00301525	0.41	11.3652
5865.76	7.84	0.276	-0.069	6.55	0.1	0.213	3.99287	-2.55713	0.000583365	0.00122868	0.00304072	0.41	11.3652
5866.85	7.84	0.276	-0.066	6.61	0.1	0.213	3.99287	-2.61713	0.000583365	0.00124777	0.00307891	0.405	11.2266
5867.83	7.84	0.276	-0.064	6.665	0.1	0.213	3.99287	-2.67213	0.000583365	0.00126051	0.00310438	0.4	11.088
5868.81	7.84	0.278	-0.062	6.7	0.1	0.213	3.99287	-2.70713	0.000602183	0.00127324	0.00314866	0.4	11.088
5869.8	7.84	0.278	-0.06	6.75	0.1	0.213	3.99287	-2.75713	0.000602183	0.00128597	0.00317413	0.395	10.9494
5870.78	7.84	0.278	-0.058	6.805	0.1	0.213	3.99287	-2.81213	0.000602183	0.0012987	0.00319959	0.39	10.8108
5871.77	7.84	0.278	-0.056	6.86	0.1	0.213	3.99287	-2.86713	0.000602183	0.00131144	0.00322506	0.39	10.8108
5872.75	7.84	0.276	-0.054	6.905	0.1	0.213	3.99287	-2.91213	0.000583365	0.00132417	0.0032317	0.385	10.6722
5873.85	7.84	0.278	-0.051	6.96	0.1	0.213	3.99287	-2.96713	0.000602183	0.00134327	0.00328872	0.385	10.6722
5874.83	7.84	0.278	-0.049	7.01	0.1	0.213	3.99287	-3.01713	0.000602183	0.001356	0.00331418	0.38	10.5336
5875.81	7.84	0.278	-0.047	7.065	0.1	0.213	3.99287	-3.07213	0.000602183	0.00136873	0.00333965	0.38	10.5336
5876.8	7.86	0.276	-0.045	7.105	0.1	0.213	4.00306	-3.10194	0.000583365	0.00138146	0.00334629	0.375	10.395
5877.78	7.84	0.276	-0.043	7.155	0.1	0.213	3.99287	-3.16213	0.000583365	0.0013942	0.00337176	0.375	10.395
5878.77	7.86	0.276	-0.04	7.21	0.1	0.213	4.00306	-3.20694	0.000583365	0.0014133	0.00340996	0.37	10.2564
5879.75	7.84	0.278	-0.039	7.255	0.1	0.213	3.99287	-3.26213	0.000602183	0.00141966	0.00344151	0.365	10.1178
5880.85	7.84	0.276	-0.036	7.31	0.1	0.213	3.99287	-3.31713	0.000583365	0.00143876	0.00346089	0.365	10.1178
5881.83	7.84	0.276	-0.034	7.365	0.1	0.213	3.99287	-3.37213	0.000583365	0.00145149	0.00348635	0.36	9.97923
5882.81	7.86	0.276	-0.032	7.41	0.1	0.213	4.00306	-3.40694	0.000583365	0.00146423	0.00351182	0.36	9.97923
5883.8	7.86	0.276	-0.03	7.47	0.1	0.213	4.00306	-3.46694	0.000583365	0.00147696	0.00353728	0.355	9.84063
5884.78	7.86	0.276	-0.028	7.51	0.1	0.213	4.00306	-3.50694	0.000583365	0.00148969	0.00356275	0.355	9.84063
5885.77	7.86	0.276	-0.026	7.565	0.1	0.213	4.00306	-3.56194	0.000583365	0.00150242	0.00358821	0.35	9.70203
5886.76	7.86	0.278	-0.023	7.61	0.1	0.213	4.00306	-3.60694	0.000602183	0.00152152	0.00364523	0.35	9.70203
5887.85	7.84	0.276	-0.021	7.665	0.1	0.213	3.99287	-3.67213	0.000583365	0.00153425	0.00365187	0.345	9.56343
5888.83	7.84	0.276	-0.019	7.705	0.1	0.213	3.99287	-3.71213	0.000583365	0.00154699	0.00367734	0.345	9.56343
5889.81	7.84	0.276	-0.017	7.765	0.1	0.213	3.99287	-3.77213	0.000583365	0.00155972	0.0037028	0.34	9.42483
5890.8	7.84	0.276	-0.015	7.81	0.1	0.213	3.99287	-3.81713	0.000583365	0.00157245	0.00372827	0.34	9.42483
5891.78	7.86	0.276	-0.013	7.86	0.1	0.213	4.00306	-3.85694	0.000583365	0.00158518	0.00375373	0.335	9.28623
5892.77	7.86	0.276	-0.011	7.905	0.1	0.213	4.00306	-3.90194	0.000583365	0.00159792	0.0037792	0.335	9.28623
5893.75	7.84	0.276	-0.008	7.96	0.1	0.213	3.99287	-3.96713	0.000583365	0.00161701	0.00381739	0.335	9.28623
5894.84	7.84	0.276	-0.006	8.01	0.1	0.213	3.99287	-4.01713	0.000583365	0.00162975	0.00384286	0.33	9.14763
5895.83	7.84	0.276	-0.004	8.065	0.1	0.213	3.99287	-4.07213	0.000583365	0.00164248	0.00386832	0.33	9.14763
5896.81	7.86	0.276	-0.002	8.105	0.1	0.213	4.00306	-4.10194	0.000583365	0.00165521	0.00389379	0.33	9.14763
5897.8	7.86	0.276	0	8.155	0.1	0.213	4.00306	-4.15194	0.000583365	0.00166794	0.00391925	0.325	9.00902
5898.79	7.86	0.276	0.002	8.205	0.1	0.213	4.00306	-4.20194	0.000583365	0.00168068	0.00394472	0.325	9.00902
5899.77	7.84	0.276	0.004	8.26	0.1	0.213	3.99287	-4.26713	0.000583365	0.00169341	0.00397018	0.32	8.87042
5900.75	7.84	0.276	0.007	8.305	0.1	0.213	3.99287	-4.31213	0.000583365	0.00171251	0.00400838	0.32	8.87042
5901.85	7.84	0.276	0.009	8.365	0.1	0.213	3.99287	-4.37213	0.000583365	0.00172524	0.00403384	0.32	8.87042
5902.83	7.86	0.276	0.011	8.41	0.1	0.213	4.00306	-4.40694	0.000583365	0.00173797	0.00405931	0.315	8.73182
5903.81	7.86	0.276	0.013	8.455	0.1	0.213	4.00306	-4.45194	0.000583365	0.0017507	0.00408477	0.315	8.73182
5904.8	7.86	0.276	0.015	8.37	0.1	0.213	4.00306	-4.36694	0.000583365	0.00176344	0.00411024	0.315	8.73182
5905.78	7.86	0.276	0.015	8.3	0.1	0.213	4.00306	-4.29694	0.000583365	0.00176344	0.00411024	0.31	8.59322
5906.77	7.86	0.276	0.014	8.305	0.1	0.213	4.00306	-4.30194	0.000583365	0.00175707	0.00409751	0.31	8.59322
5907.76	7.84	0.276	0.015	8.35	0.1	0.213	3.99287	-4.35713	0.000583365	0.00176344	0.00411024	0.31	8.59322
5908.85	7.84	0.276	0.015	8.39	0.1	0.213	3.99287	-4.39713	0.000583365	0.00176344	0.00411024	0.31	8.59322
5909.83	7.84	0.274	0.016	8.415	0.1	0.213	3.99287	-4.42213	0.000564546	0.0017698	0.00410415	0.305	8.45462
5910.81	7.84	0.276	0.017	8.43	0.1	0.213	3.99287	-4.43713	0.000583365	0.00177617	0.0041357	0.305	8.45462
5911.8	7.84	0.276	0.018	8.445	0.1	0.213	3.99287	-4.45213	0.000583365	0.00178254	0.00414844	0.305	8.45462
5912.79	7.84	0.276	0.018	8.45	0.1	0.213	3.99287	-4.45713	0.000583365	0.00178254	0.00414844	0.305	8.45462
5913.77	7.86	0.276	0.019	8.47	0.1	0.213	4.00306	-4.46694	0.000583365	0.0017889	0.00416117	0.305	8.45462
5914.75	7.86	0.276	0.019	8.475	0.1	0.213	4.00306	-4.47194	0.000583365	0.0017889	0.00416117	0.305	8.45462
5915.84	7.86	0.276	0.02	8.49	0.1	0.213	4.00306	-4.48694	0.000583365	0.00179527	0.0041739	0.305	8.45462
5916.83	7.86	0.276	0.02	8.495	0.1	0.213	4.00306	-4.49194	0.000583365	0.00179527	0.0041739	0.305	8.45462
5917.81	7.88	0.276	0.021	8.505	0.1	0.213	4.01324	-4.49176	0.000583365	0.00180163	0.00418663	0.3	8.31602
5918.8	7.88	0.276	0.021	8.51	0.1	0.213	4.01324	-4.49676	0.000583365	0.00180163	0.00418663	0.3	8.31602
5919.79	7.88	0.276	0.022	8.52	0.1	0.213	4.01324	-4.50676	0.000583365	0.001808	0.00419937	0.3	8.31602
5920.77	7.88	0.276	0.022	8.52	0.1	0.213	4.01324	-4.50676	0.000583365	0.001808	0.00419937	0.3	8.31602
5921.76	7.88	0.276	0.022	8.535	0.1	0.213	4.01324	-4.52176	0.000583365	0.001808	0.00419937	0.3	8.31602
5922.85	7.88	0.274	0.023	8.535	0.1	0.213	4.01324	-4.52176	0.000564546	0.00181437	0.00419328	0.3	8.31602
5923.83	7.86	0.276	0.023	8.545	0.1	0.213	4.00306	-4.54194	0.000583365	0.00181437	0.0042121	0.3	8.31602
5924.81	7.86	0.276	0.024	8.55	0.1	0.213	4.00306	-4.54694	0.000583365	0.00182073	0.00422483	0.3	8.31602
5925.8	7.86	0.276	0.024	8.56	0.1	0.213	4.00306	-4.55694	0.000583365	0.00182073	0.00422483	0.3	8.31602
5926.78	7.86	0.276	0.024	8.56	0.1	0.213	4.00306	-4.55694	0.000583365	0.00182073	0.00422483	0.295	8.17742
5927.77	7.86	0.276	0.025	8.565	0.1	0.213	4.00306	-4.56194	0.000583365	0.0018271	0.00423756	0.3	8.31602
5928.75	7.84	0.276	0.025	8.57	0.1	0.213	3.99287	-4.57713	0.000583365	0.0018271	0.00423756	0.295	8.17742
5929.84	7.82	0.276	0.025	8.575	0.1	0.213	3.98268	-4.59232	0.000583365	0.0018271	0.00423756	0.295	8.17742
5930.83	7.82	0.274	0.026	8.58	0.1	0.213	3.98268	-4.59732	0.000564546	0.00183346	0.00423148	0.295	8.17742
5931.81	7.84	0.276	0.026	8.585	0.1	0.213	3.99287	-4.59213	0.000583365	0.00183346	0.00425029	0.295	8.17742
5932.8	7.84	0.274	0.026	8.585	0.1	0.213	3.99287	-4.59213	0.000564546	0.00183346	0.00423148	0.295	8.17742
5933.78	7.84	0.274	0.026	8.59	0.1	0.213	3.99287	-4.59713	0.000564546	0.00183346	0.00423148	0.295	8.17742
5934.77	7.84	0.274	0.027	8.595	0.1	0.213	3.99287	-4.60213	0.000564546	0.00183983	0.00424421	0.295	8.17742
5935.75	7.84	0.276	0.027	8.595	0.1	0.213	3.99287	-4.60213	0.000583365	0.00183983	0.00426303	0.295	8.17742
5936.85	7.84	0.276	0.027	8.595	0.1	0.213	3.99287	-4.60213	0.000583365	0.00183983	0.00426303	0.295	8.17742
5937.83	7.84	0.274	0.027	8.6	0.1	0.213	3.99287	-4.60713	0.000564546	0.00183983	0.00424421	0.295	8.17742
5938.81	7.84	0.276	0.028	8.6	0.1	0.213	3.99287	-4.60713	0.000583365	0.0018462	0.00427576	0.295	8.17742
5939.8	7.84	0.276	0.028	8.6	0.1	0.213	3.99287	-4.60713	0.000583365	0.0018462	0.00427576	0.295	8.17742
5940.78	7.84	0.276	0.028	8.6	0.1	0.213	3.99287	-4.60713	0.000583365	0.0018462	0.00427576	0.295	8.17742
5941.77	7.84	0.276	0.028	8.6	0.1	0.213	3.99287	-4.60713	0.000583365	0.0018462	0.00427576	0.29	8.03882
5942.76	7.84	0.274	0.028	8.6	0.1	0.213	3.99287	-4.60713	0.000564546	0.0018462	0.00425694	0.295	8.17742
5943.84	7.84	0.274	0.028	8.6	0.1	0.213	3.99287	-4.60713	0.000564546	0.0018462	0.00425694	0.29	8.03882
5944.83	7.84	0.276	0.028	8.6	0.1	0.213	3.99287	-4.60713	0.000583365	0.0018462	0.00427576	0.295	8.17742
5945.81	7.84	0.276	0.029	8.6	0.1	0.213	3.99287	-4.60713	0.000583365	0.00185256	0.00428849	0.29	8.03882
5946.8	7.84	0.274	0.029	8.6	0.1	0.213	3.99287	-4.60713	0.000564546	0.00185256	0.00426967	0.29	8.03882
5947.78	7.84	0.276	0.029	8.6	0.1	0.213	3.99287	-4.60713	0.000583365	0.00185256	0.00428849	0.29	8.03882
5948.77	7.84	0.274	0.029	8.6	0.1	0.213	3.99287	-4.60713	0.000564546	0.00185256	0.00426967	0.29	8.03882
5949.75	7.84	0.276	0.029	8.6	0.1	0.213	3.99287	-4.60713	0.000583365	0.00185256	0.00428849	0.29	8.03882
5950.84	7.84	0.276	0.029	8.6	0.1	0.213	3.99287	-4.60713	0.000583365	0.00185256	0.00428849	0.29	8.03882
5951.83	7.84	0.276	0.029	8.6	0.1	0.213	3.99287	-4.60713	0.000583365	0.00185256	0.00428849	0.29	8.03882
5952.81	7.84	0.276	0.03	8.6	0.1	0.213	3.99287	-4.60713	0.000583365	0.00185893	0.00430122	0.29	8.03882
5953.8	7.84	0.276	0.03	8.6	0.1	0.213	3.99287	-4.60713	0.000583365	0.00185893	0.00430122	0.29	8.03882
5954.78	7.84	0.274	0.03	8.6	0.1	0.213	3.99287	-4.60713	0.000564546	0.00185893	0.00428241	0.29	8.03882
5955.77	7.84	0.274	0.03	8.6	0.1	0.213	3.99287	-4.60713	0.000564546	0.00185893	0.00428241	0.29	8.03882
5956.75	7.84	0.274	0.03	8.6	0.1	0.213	3.99287	-4.60713	0.000564546	0.00185893	0.00428241	0.29	8.03882
5957.84	7.84	0.276	0.03	8.6	0.1	0.213	3.99287	-4.60713	0.000583365	0.00185893	0.00430122	0.29	8.03882
5958.83	7.84	0.276	0.03	8.6	0.1	0.213	3.99287	-4.60713	0.000583365	0.00185893	0.00430122	0.29	8.03882
5959.81	7.84	0.274	0.03	8.6	0.1	0.213	3.99287	-4.60713	0.000564546	0.00185893	0.00428241	0.29	8.03882
5960.8	7.84	0.276	0.03	8.6	0.1	0.213	3.99287	-4.60713	0.000583365	0.00185893	0.00430122	0.29	8.03882
5961.78	7.84	0.274	0.03	8.6	0.1	0.213	3.99287	-4.60713	0.000564546	0.00185893	0.00428241	0.29	8.03882
5962.77	7.84	0.274	0.031	8.6	0.1	0.213	3.99287	-4.60713	0.000564546	0.0018653	0.00429514	0.29	8.03882
5963.75	7.84	0.276	0.031	8.6	0.1	0.213	3.99287	-4.60713	0.000583365	0.0018653	0.00431396	0.29	8.03882
5964.85	7.84	0.276	0.031	8.6	0.1	0.213	3.99287	-4.60713	0.000583365	0.0018653	0.00431396	0.29	8.03882
5965.83	7.84	0.276	0.031	8.6	0.1	0.213	3.99287	-4.60713	0.000583365	0.0018653	0.00431396	0.29	8.03882
5966.81	7.84	0.274	0.031	8.6	0.1	0.213	3.99287	-4.60713	0.000564546	0.0018653	0.00429514	0.29	8.03882
5967.8	7.86	0.276	0.031	8.6	0.1	0.213	4.00306	-4.59694	0.000583365	0.0018653	0.00431396	0.29	8.03882
5968.78	7.84	0.276	0.031	8.6	0.1	0.213	3.99287	-4.60713	0.000583365	0.0018653	0.00431396	0.29	8.03882
5969.77	7.84	0.276	0.031	8.6	0.1	0.213	3.99287	-4.60713	0.000583365	0.0018653	0.00431396	0.29	8.03882
5970.75	7.84	0.276	0.031	8.6	0.1	0.213	3.99287	-4.60713	0.000583365	0.0018653	0.00431396	0.29	8.03882
5971.85	7.84	0.276	0.031	8.6	0.1	0.213	3.99287	-4.60713	0.000583365	0.0018653	0.00431396	0.29	8.03882
5972.83	7.84	0.276	0.031	8.6	0.1	0.213	3.99287	-4.60713	0.000583365	0.0018653	0.00431396	0.29	8.03882
5973.81	7.84	0.276	0.031	8.6	0.1	0.213	3.99287	-4.60713	0.000583365	0.0018653	0.00431396	0.29	8.03882
5974.8	7.84	0.274	0.031	8.6	0.1	0.213	3.99287	-4.60713	0.000564546	0.0018653	0.00429514	0.285	7.90022
5975.79	7.84	0.276	0.032	8.6	0.1	0.213	3.99287	-4.60713	0.000583365	0.00187166	0.00432669	0.285	7.90022
5976.77	7.84	0.276	0.032	8.6	0.1	0.213	3.99287	-4.60713	0.000583365	0.00187166	0.00432669	0.29	8.03882
5977.76	7.84	0.276	0.032	8.6	0.1	0.213	3.99287	-4.60713	0.000583365	0.00187166	0.00432669	0.285	7.90022
5978.85	7.84	0.276	0.032	8.6	0.1	0.213	3.99287	-4.60713	0.000583365	0.00187166	0.00432669	0.285	7.90022
5979.83	7.84	0.274	0.032	8.6	0.1	0.213	3.99287	-4.60713	0.000564546	0.00187166	0.00430787	0.285	7.90022
5980.81	7.84	0.276	0.032	8.6	0.1	0.213	3.99287	-4.60713	0.000583365	0.00187166	0.00432669	0.285	7.90022
5981.8	7.84	0.276	0.032	8.6	0.1	0.213	3.99287	-4.60713	0.000583365	0.00187166	0.00432669	0.285	7.90022
5982.78	7.84	0.276	0.032	8.6	0.1	0.213	3.99287	-4.60713	0.000583365	0.00187166	0.00432669	0.285	7.90022
5983.77	7.84	0.276	0.032	8.6	0.1	0.213	3.99287	-4.60713	0.000583365	0.00187166	0.00432669	0.285	7.90022
5984.75	7.84	0.276	0.032	8.6	0.1	0.213	3.99287	-4.60713	0.000583365	0.00187166	0.00432669	0.285	7.90022
5985.85	7.84	0.276	0.032	8.6	0.1	0.213	3.99287	-4.60713	0.000583365	0.00187166	0.00432669	0.285	7.90022
5986.83	7.84	0.276	0.032	8.6	0.1	0.213	3.99287	-4.60713	0.000583365	0.00187166	0.00432669	0.285	7.90022
5987.81	7.84	0.276	0.032	8.6	0.1	0.213	3.99287	-4.60713	0.000583365	0.00187166	0.00432669	0.285	7.90022
5988.8	7.84	0.274	0.032	8.6	0.1	0.213	3.99287	-4.60713	0.000564546	0.00187166	0.00430787	0.285	7.90022
5989.78	7.84	0.276	0.032	8.6	0.1	0.213	3.99287	-4.60713	0.000583365	0.00187166	0.00432669	0.285	7.90022
5990.77	7.84	0.276	0.033	8.6	0.1	0.213	3.99287	-4.60713	0.000583365	0.00187803	0.00433942	0.285	7.90022
5991.75	7.84	0.276	0.033	8.6	0.1	0.213	3.99287	-4.60713	0.000583365	0.00187803	0.00433942	0.285	7.90022
5992.84	7.84	0.276	0.033	8.6	0.1	0.213	3.99287	-4.60713	0.000583365	0.00187803	0.00433942	0.285	7.90022
5993.83	7.84	0.276	0.033	8.6	0.1	0.213	3.99287	-4.60713	0.000583365	0.00187803	0.00433942	0.285	7.90022
5994.81	7.84	0.274	0.033	8.6	0.1	0.213	3.99287	-4.60713	0.000564546	0.00187803	0.0043206	0.285	7.90022
5995.8	7.86	0.276	0.033	8.6	0.1	0.213	4.00306	-4.59694	0.000583365	0.00187803	0.00433942	0.285	7.90022
5996.78	7.84	0.276	0.033	8.6	0.1	0.213	3.99287	-4.60713	0.000583365	0.00187803	0.00433942	0.285	7.90022
5997.77	7.84	0.276	0.033	8.6	0.1	0.213	3.99287	-4.60713	0.000583365	0.00187803	0.00433942	0.285	7.90022
5998.75	7.84	0.276	0.033	8.6	0.1	0.213	3.99287	-4.60713	0.000583365	0.00187803	0.00433942	0.285	7.90022
5999.85	7.84	0.276	0.033	8.6	0.1	0.213	3.99287	-4.60713	0.000583365	0.00187803	0.00433942	0.285	7.90022
6000.83	7.84	0.276	0.033	8.6	0.1	0.213	3.99287	-4.60713	0.000583365	0.00187803	0.00433942	0.285	7.90022
6001.81	7.84	0.276	0.033	8.6	0.1	0.213	3.99287	-4.60713	0.000583365	0.00187803	0.00433942	0.285	7.90022
6002.8	7.84	0.276	0.033	8.6	0.1	0.213	3.99287	-4.60713	0.000583365	0.00187803	0.00433942	0.285	7.90022
6003.78	7.84	0.276	0.033	8.6	0.1	0.213	3.99287	-4.60713	0.000583365	0.00187803	0.00433942	0.285	7.90022
6004.77	7.84	0.276	0.033	8.6	0.1	0.213	3.99287	-4.60713	0.000583365	0.00187803	0.00433942	0.285	7.90022
6005.75	7.84	0.276	0.033	8.6	0.1	0.213	3.99287	-4.60713	0.000583365	0.00187803	0.00433942	0.285	7.90022
6006.85	7.84	0.276	0.033	8.6	0.1	0.213	3.99287	-4.60713	0.000583365	0.00187803	0.00433942	0.285	7.90022
6007.83	7.84	0.276	0.033	8.6	0.1	0.213	3.99287	-4.60713	0.000583365	0.00187803	0.00433942	0.285	7.90022
6008.81	7.84	0.276	0.033	8.6	0.1	0.213	3.99287	-4.60713	0.000583365	0.00187803	0.00433942	0.285	7.90022
6009.8	7.84	0.276	0.033	8.6	0.1	0.213	3.99287	-4.60713	0.000583365	0.00187803	0.00433942	0.285	7.90022
6010.78	7.84	0.276	0.033	8.6	0.1	0.213	3.99287	-4.60713	0.000583365	0.00187803	0.00433942	0.285	7.90022
6011.77	7.84	0.276	0.034	8.6	0.1	0.213	3.99287	-4.60713	0.000583365	0.00188439	0.00435215	0.285	7.90022
6012.75	7.84	0.276	0.034	8.6	0.1	0.213	3.99287	-4.60713	0.000583365	0.00188439	0.00435215	0.285	7.90022
6013.85	7.84	0.276	0.034	8.6	0.1	0.213	3.99287	-4.60713	0.000583365	0.00188439	0.00435215	0.285	7.90022
6014.83	7.84	0.276	0.034	8.6	0.1	0.213	3.99287	-4.60713	0.000583365	0.00188439	0.00435215	0.285	7.90022
6015.81	7.84	0.276	0.034	8.6	0.1	0.213	3.99287	-4.60713	0.000583365	0.00188439	0.00435215	0.285	7.90022
6016.8	7.84	0.276	0.034	8.6	0.1	0.213	3.99287	-4.60713	0.000583365	0.00188439	0.00435215	0.285	7.90022
6017.78	7.84	0.276	0.034	8.6	0.1	0.213	3.99287	-4.60713	0.000583365	0.00188439	0.00435215	0.285	7.90022
6018.77	7.84	0.276	0.034	8.6	0.1	0.213	3.99287	-4.60713	0.000583365	0.00188439	0.00435215	0.285	7.90022
6019.75	7.84	0.276	0.034	8.6	0.1	0.213	3.99287	-4.60713	0.000583365	0.00188439	0.00435215	0.285	7.90022
6020.84	7.84	0.276	0.034	8.6	0.1	0.213	3.99287	-4.60713	0.000583365	0.00188439	0.00435215	0.285	7.90022
6021.83	7.86	0.276	0.034	8.6	0.1	0.213	4.00306	-4.59694	0.000583365	0.00188439	0.00435215	0.285	7.90022
6022.81	7.84	0.276	0.034	8.6	0.1	0.213	3.99287	-4.60713	0.000583365	0.00188439	0.00435215	0.285	7.90022
6023.8	7.84	0.276	0.034	8.6	0.1	0.213	3.99287	-4.60713	0.000583365	0.00188439	0.00435215	0.285	7.90022
6024.79	7.84	0.276	0.034	8.6	0.1	0.213	3.99287	-4.60713	0.000583365	0.00188439	0.00435215	0.285	7.90022
6025.77	7.84	0.276	0.034	8.6	0.1	0.213	3.99287	-4.60713	0.000583365	0.00188439	0.00435215	0.285	7.90022
6026.76	7.84	0.276	0.034	8.6	0.1	0.213	3.99287	-4.60713	0.000583365	0.00188439	0.00435215	0.285	7.90022
6027.84	7.84	0.276	0.034	8.6	0.1	0.213	3.99287	-4.60713	0.000583365	0.00188439	0.00435215	0.285	7.90022
6028.83	7.84	0.276	0.034	8.6	0.1	0.213	3.99287	-4.60713	0.000583365	0.00188439	0.00435215	0.285	7.90022
6029.81	7.86	0.276	0.034	8.6	0.1	0.213	4.00306	-4.59694	0.000583365	0.00188439	0.00435215	0.285	7.90022
6030.8	7.84	0.276	0.034	8.6	0.1	0.213	3.99287	-4.60713	0.000583365	0.00188439	0.00435215	0.285	7.90022
6031.78	7.84	0.276	0.034	8.6	0.1	0.213	3.99287	-4.60713	0.000583365	0.00188439	0.00435215	0.28	7.76162
6032.77	7.84	0.276	0.034	8.6	0.1	0.213	3.99287	-4.60713	0.000583365	0.00188439	0.00435215	0.28	7.76162
6033.75	7.84	0.276	0.034	8.6	0.1	0.213	3.99287	-4.60713	0.000583365	0.00188439	0.00435215	0.28	7.76162
6034.84	7.84	0.276	0.034	8.6	0.1	0.213	3.99287	-4.60713	0.000583365	0.00188439	0.00435215	0.285	7.90022
6035.83	7.86	0.276	0.034	8.6	0.1	0.213	4.00306	-4.59694	0.000583365	0.00188439	0.00435215	0.28	7.76162
6036.81	7.84	0.276	0.035	8.6	0.1	0.213	3.99287	-4.60713	0.000583365	0.00189076	0.00436489	0.28	7.76162
6037.8	7.86	0.276	0.035	8.6	0.1	0.213	4.00306	-4.59694	0.000583365	0.00189076	0.00436489	0.28	7.76162
6038.78	7.86	0.276	0.035	8.6	0.1	0.213	4.00306	-4.59694	0.000583365	0.00189076	0.00436489	0.28	7.76162
6039.77	7.84	0.276	0.035	8.6	0.1	0.213	3.99287	-4.60713	0.000583365	0.00189076	0.00436489	0.28	7.76162
6040.76	7.84	0.276	0.035	8.6	0.1	0.213	3.99287	-4.60713	0.000583365	0.00189076	0.00436489	0.28	7.76162
6041.84	7.84	0.276	0.035	8.6	0.1	0.213	3.99287	-4.60713	0.000583365	0.00189076	0.00436489	0.28	7.76162
6042.83	7.84	0.278	0.035	8.6	0.1	0.213	3.99287	-4.60713	0.000602183	0.00189076	0.0043837	0.28	7.76162
6043.81	7.84	0.276	0.035	8.6	0.1	0.213	3.99287	-4.60713	0.000583365	0.00189076	0.00436489	0.28	7.76162
6044.8	7.84	0.276	0.035	8.6	0.1	0.213	3.99287	-4.60713	0.000583365	0.00189076	0.00436489	0.28	7.76162
6045.78	7.84	0.278	0.035	8.6	0.1	0.213	3.99287	-4.60713	0.000602183	0.00189076	0.0043837	0.28	7.76162
6046.77	7.84	0.276	0.035	8.6	0.1	0.213	3.99287	-4.60713	0.000583365	0.00189076	0.00436489	0.28	7.76162
6047.75	7.84	0.278	0.035	8.6	0.1	0.213	3.99287	-4.60713	0.000602183	0.00189076	0.0043837	0.28	7.76162
6048.85	7.84	0.278	0.035	8.6	0.1	0.213	3.99287	-4.60713	0.000602183	0.00189076	0.0043837	0.28	7.76162
6049.83	7.84	0.278	0.035	8.6	0.1	0.213	3.99287	-4.60713	0.000602183	0.00189076	0.0043837	0.28	7.76162
6050.81	7.84	0.276	0.035	8.6	0.1	0.213	3.99287	-4.60713	0.000583365	0.00189076	0.00436489	0.28	7.76162
6051.8	7.84	0.276	0.035	8.6	0.1	0.213	3.99287	-4.60713	0.000583365	0.00189076	0.00436489	0.28	7.76162
6052.78	7.84	0.276	0.035	8.6	0.1	0.213	3.99287	-4.60713	0.000583365	0.00189076	0.00436489	0.28	7.76162
6053.77	7.84	0.276	0.035	8.6	0.1	0.213	3.99287	-4.60713	0.000583365	0.00189076	0.00436489	0.28	7.76162
6054.75	7.84	0.276	0.035	8.6	0.1	0.213	3.99287	-4.60713	0.000583365	0.00189076	0.00436489	0.28	7.76162
6055.85	7.84	0.276	0.035	8.6	0.1	0.213	3.99287	-4.60713	0.000583365	0.00189076	0.00436489	0.28	7.76162
6056.83	7.84	0.278	0.035	8.56	0.1	0.213	3.99287	-4.56713	0.000602183	0.00189076	0.0043837	0.28	7.76162
6057.81	7.86	0.278	0.035	8.525	0.1	0.213	4.00306	-4.52194	0.000602183	0.00189076	0.0043837	0.28	7.76162
6058.8	7.84	0.276	0.035	8.485	0.1	0.213	3.99287	-4.49213	0.000583365	0.00189076	0.00436489	0.28	7.76162
6059.79	7.86	0.276	0.035	8.445	0.1	0.213	4.00306	-4.44194	0.000583365	0.00189076	0.00436489	0.28	7.76162
6060.77	7.86	0.278	0.034	8.385	0.1	0.213	4.00306	-4.38194	0.000602183	0.00188439	0.00437097	0.28	7.76162
6061.76	7.88	0.278	0.034	8.335	0.1	0.213	4.01324	-4.32176	0.000602183	0.00188439	0.00437097	0.28	7.76162
6062.85	7.86	0.276	0.034	8.27	0.1	0.213	4.00306	-4.26694	0.000583365	0.00188439	0.00435215	0.28	7.76162
6063.83	7.86	0.276	0.033	8.22	0.1	0.213	4.00306	-4.21694	0.000583365	0.00187803	0.00433942	0.28	7.76162
6064.81	7.86	0.276	0.033	8.17	0.1	0.213	4.00306	-4.16694	0.000583365	0.00187803	0.00433942	0.28	7.76162
6065.8	7.86	0.276	0.033	8.125	0.1	0.213	4.00306	-4.12194	0.000583365	0.00187803	0.00433942	0.28	7.76162
6066.78	7.84	0.276	0.032	8.07	0.1	0.213	3.99287	-4.07713	0.000583365	0.00187166	0.00432669	0.28	7.76162
6067.77	7.84	0.276	0.032	8.02	0.1	0.213	3.99287	-4.02713	0.000583365	0.00187166	0.00432669	0.28	7.76162
6068.76	7.84	0.276	0.032	7.975	0.1	0.213	3.99287	-3.98213	0.000583365	0.00187166	0.00432669	0.28	7.76162
6069.84	7.84	0.276	0.031	7.92	0.1	0.213	3.99287	-3.92713	0.000583365	0.0018653	0.00431396	0.28	7.76162
6070.83	7.84	0.274	0.031	7.875	0.1	0.213	3.99287	-3.88213	0.000564546	0.0018653	0.00429514	0.28	7.76162
6071.81	7.84	0.274	0.031	7.82	0.1	0.213	3.99287	-3.82713	0.000564546	0.0018653	0.00429514	0.28	7.76162
6072.8	7.84	0.274	0.03	7.765	0.1	0.213	3.99287	-3.77213	0.000564546	0.00185893	0.00428241	0.28	7.76162
6073.78	7.84	0.274	0.03	7.725	0.1	0.213	3.99287	-3.73213	0.000564546	0.00185893	0.00428241	0.28	7.76162
6074.77	7.84	0.274	0.03	7.665	0.1	0.213	3.99287	-3.67213	0.000564546	0.00185893	0.00428241	0.28	7.76162
6075.75	7.84	0.274	0.029	7.625	0.1	0.213	3.99287	-3.63213	0.000564546	0.00185256	0.00426967	0.28	7.76162
6076.84	7.84	0.274	0.029	7.57	0.1	0.213	3.99287	-3.57713	0.000564546	0.00185256	0.00426967	0.28	7.76162
6077.83	7.84	0.274	0.028	7.52	0.1	0.213	3.99287	-3.52713	0.000564546	0.0018462	0.00425694	0.28	7.76162
6078.81	7.84	0.274	0.028	7.465	0.1	0.213	3.99287	-3.47213	0.000564546	0.0018462	0.00425694	0.28	7.76162
6079.8	7.84	0.274	0.028	7.425	0.1	0.213	3.99287	-3.43213	0.000564546	0.0018462	0.00425694	0.28	7.76162
6080.79	7.84	0.274	0.027	7.37	0.1	0.213	3.99287	-3.37713	0.000564546	0.00183983	0.00424421	0.28	7.76162
6081.77	7.86	0.274	0.027	7.325	0.1	0.213	4.00306	-3.32194	0.000564546	0.00183983	0.00424421	0.28	7.76162
6082.75	7.86	0.274	0.026	7.27	0.1	0.213	4.00306	-3.26694	0.000564546	0.00183346	0.00423148	0.28	7.76162
6083.85	7.86	0.273	0.026	7.22	0.1	0.213	4.00306	-3.21694	0.000555137	0.00183346	0.00422207	0.28	7.76162
6084.83	7.84	0.274	0.025	7.165	0.1	0.213	3.99287	-3.17213	0.000564546	0.0018271	0.00421874	0.28	7.76162
6085.81	7.84	0.274	0.025	7.12	0.1	0.213	3.99287	-3.12713	0.000564546	0.0018271	0.00421874	0.28	7.76162
6086.8	7.84	0.273	0.025	7.075	0.1	0.213	3.99287	-3.08213	0.000555137	0.0018271	0.00420933	0.28	7.76162
6087.79	7.84	0.273	0.024	7.025	0.1	0.213	3.99287	-3.03213	0.000555137	0.00182073	0.0041966	0.28	7.76162
6088.77	7.84	0.274	0.024	6.97	0.1	0.213	3.99287	-2.97713	0.000564546	0.00182073	0.00420601	0.28	7.76162
6089.75	7.84	0.273	0.023	6.92	0.1	0.213	3.99287	-2.92713	0.000555137	0.00181437	0.00418387	0.28	7.76162
6090.85	7.84	0.273	0.023	6.87	0.1	0.213	3.99287	-2.87713	0.000555137	0.00181437	0.00418387	0.28	7.76162
6091.83	7.84	0.273	0.022	6.815	0.1	0.213	3.99287	-2.82213	0.000555137	0.001808	0.00417114	0.28	7.76162
6092.81	7.84	0.273	0.022	6.77	0.1	0.213	3.99287	-2.77713	0.000555137	0.001808	0.00417114	0.28	7.76162
6093.8	7.86	0.273	0.021	6.73	0.1	0.213	4.00306	-2.72694	0.000555137	0.00180163	0.00415841	0.28	7.76162
6094.79	7.84	0.273	0.021	6.675	0.1	0.213	3.99287	-2.68213	0.000555137	0.00180163	0.00415841	0.28	7.76162
6095.77	7.86	0.273	0.02	6.625	0.1	0.213	4.00306	-2.62194	0.000555137	0.00179527	0.00414567	0.28	7.76162
6096.75	7.84	0.273	0.019	6.57	0.1	0.213	3.99287	-2.57713	0.000555137	0.0017889	0.00413294	0.28	7.76162
6097.85	7.84	0.273	0.019	6.52	0.1	0.213	3.99287	-2.52713	0.000555137	0.0017889	0.00413294	0.28	7.76162
6098.83	7.84	0.273	0.018	6.465	0.1	0.213	3.99287	-2.47213	0.000555137	0.00178254	0.00412021	0.28	7.76162
6099.81	7.84	0.273	0.018	6.415	0.1	0.213	3.99287	-2.42213	0.000555137	0.00178254	0.00412021	0.28	7.76162
6100.8	7.84	0.273	0.017	6.37	0.1	0.213	3.99287	-2.37713	0.000555137	0.00177617	0.00410748	0.28	7.76162
6101.79	7.84	0.273	0.017	6.32	0.1	0.213	3.99287	-2.32713	0.000555137	0.00177617	0.00410748	0.28	7.76162
6102.77	7.84	0.273	0.016	6.27	0.1	0.213	3.99287	-2.27713	0.000555137	0.0017698	0.00409474	0.28	7.76162
6103.76	7.84	0.273	0.015	6.22	0.1	0.213	3.99287	-2.22713	0.000555137	0.00176344	0.00408201	0.28	7.76162
6104.85	7.84	0.273	0.015	6.17	0.1	0.213	3.99287	-2.17713	0.000555137	0.00176344	0.00408201	0.28	7.76162
6105.83	7.84	0.273	0.014	6.115	0.1	0.213	3.99287	-2.12213	0.000555137	0.00175707	0.00406928	0.28	7.76162
6106.81	7.84	0.273	0.014	6.065	0.1	0.213	3.99287	-2.07213	0.000555137	0.00175707	0.00406928	0.28	7.76162
6107.8	7.84	0.273	0.013	6.02	0.1	0.213	3.99287	-2.02713	0.000555137	0.0017507	0.00405655	0.28	7.76162
6108.79	7.84	0.273	0.012	5.965	0.1	0.213	3.99287	-1.97213	0.000555137	0.00174434	0.00404381	0.28	7.76162
6109.77	7.84	0.271	0.012	5.92	0.1	0.213	3.99287	-1.92713	0.000536319	0.00174434	0.004025	0.28	7.76162
6110.75	7.84	0.273	0.011	5.87	0.1	0.213	3.99287	-1.87713	0.000555137	0.00173797	0.00403108	0.28	7.76162
6111.84	7.84	0.273	0.01	5.82	0.1	0.213	3.99287	-1.82713	0.000555137	0.00173161	0.00401835	0.28	7.76162
6112.83	7.84	0.273	0.01	5.77	0.1	0.213	3.99287	-1.77713	0.000555137	0.00173161	0.00401835	0.28	7.76162
6113.81	7.84	0.273	0.009	5.725	0.1	0.213	3.99287	-1.73213	0.000555137	0.00172524	0.00400562	0.28	7.76162
6114.8	7.84	0.271	0.008	5.675	0.1	0.213	3.99287	-1.68213	0.000536319	0.00171887	0.00397407	0.28	7.76162
6115.78	7.84	0.271	0.007	5.625	0.1	0.213	3.99287	-1.63213	0.000536319	0.00171251	0.00396133	0.28	7.76162
6116.77	7.84	0.273	0.007	5.57	0.1	0.213	3.99287	-1.57713	0.000555137	0.00171251	0.00398015	0.28	7.76162
6117.75	7.84	0.273	0.006	5.525	0.1	0.213	3.99287	-1.53213	0.000555137	0.00170614	0.00396742	0.28	7.76162
6118.85	7.84	0.273	0.005	5.47	0.1	0.213	3.99287	-1.47713	0.000555137	0.00169977	0.00395469	0.28	7.76162
6119.83	7.84	0.273	0.004	5.415	0.1	0.213	3.99287	-1.42213	0.000555137	0.00169341	0.00394195	0.28	7.76162
6120.81	7.84	0.273	0.003	5.37	0.1	0.213	3.99287	-1.37713	0.000555137	0.00168704	0.00392922	0.28	7.76162
6121.8	7.84	0.271	0.003	5.325	0.1	0.213	3.99287	-1.33213	0.000536319	0.00168704	0.0039104	0.28	7.76162
6122.78	7.84	0.273	0.002	5.275	0.1	0.213	3.99287	-1.28213	0.000555137	0.00168068	0.00391649	0.28	7.76162
6123.77	7.84	0.271	0.001	5.225	0.1	0.213	3.99287	-1.23213	0.000536319	0.00167431	0.00388494	0.28	7.76162
6124.76	7.84	0.273	0	5.17	0.1	0.213	3.99287	-1.17713	0.000555137	0.00166794	0.00389102	0.28	7.76162
6125.84	7.84	0.273	-0.001	5.115	0.1	0.213	3.99287	-1.12213	0.000555137	0.00166158	0.00387829	0.28	7.76162
6126.83	7.84	0.273	-0.002	5.07	0.1	0.213	3.99287	-1.07713	0.000555137	0.00165521	0.00386556	0.28	7.76162
6127.81	7.84	0.273	-0.002	5.02	0.1	0.213	3.99287	-1.02713	0.000555137	0.00165521	0.00386556	0.28	7.76162
6128.8	7.84	0.271	-0.003	4.97	0.1	0.213	3.99287	-0.97713	0.000536319	0.00164885	0.00383401	0.28	7.76162
6129.79	7.84	0.273	-0.004	4.92	0.1	0.213	3.99287	-0.92713	0.000555137	0.00164248	0.0038401	0.28	7.76162
6130.77	7.84	0.273	-0.005	4.87	0.1	0.213	3.99287	-0.87713	0.000555137	0.00163611	0.00382736	0.28	7.76162
6131.76	7.84	0.273	-0.006	4.825	0.1	0.213	3.99287	-0.83213	0.000555137	0.00162975	0.00381463	0.285	7.90022
6132.85	7.84	0.273	-0.007	4.77	0.1	0.213	3.99287	-0.77713	0.000555137	0.00162338	0.0038019	0.285	7.90022
6133.83	7.84	0.271	-0.008	4.72	0.1	0.213	3.99287	-0.72713	0.000536319	0.00161701	0.00377035	0.285	7.90022
6134.81	7.84	0.273	-0.008	4.675	0.1	0.213	3.99287	-0.68213	0.000555137	0.00161701	0.00378917	0.285	7.90022
6135.8	7.84	0.273	-0.009	4.625	0.1	0.213	3.99287	-0.63213	0.000555137	0.00161065	0.00377643	0.285	7.90022
6136.78	7.84	0.273	-0.01	4.57	0.1	0.213	3.99287	-0.57713	0.000555137	0.00160428	0.0037637	0.285	7.90022
6137.77	7.86	0.273	-0.011	4.52	0.1	0.213	4.00306	-0.516944	0.000555137	0.00159792	0.00375097	0.285	7.90022
6138.76	7.84	0.273	-0.012	4.475	0.1	0.213	3.99287	-0.48213	0.000555137	0.00159155	0.00373824	0.285	7.90022
6139.85	7.86	0.271	-0.013	4.42	0.1	0.213	4.00306	-0.416944	0.000536319	0.00158518	0.00370669	0.285	7.90022
6140.83	7.84	0.271	-0.014	4.365	0.1	0.213	3.99287	-0.37213	0.000536319	0.00157882	0.00369395	0.285	7.90022
6141.81	7.86	0.273	-0.015	4.325	0.1	0.213	4.00306	-0.321944	0.000555137	0.00157245	0.00370004	0.285	7.90022
6142.8	7.84	0.273	-0.016	4.275	0.1	0.213	3.99287	-0.28213	0.000555137	0.00156608	0.00368731	0.285	7.90022
6143.78	7.84	0.273	-0.017	4.225	0.1	0.213	3.99287	-0.23213	0.000555137	0.00155972	0.00367457	0.285	7.90022
6144.77	7.84	0.273	-0.018	4.17	0.1	0.213	3.99287	-0.17713	0.000555137	0.00155335	0.00366184	0.285	7.90022
6145.75	7.84	0.273	-0.019	4.12	0.1	0.213	3.99287	-0.12713	0.000555137	0.00154699	0.00364911	0.285	7.90022
6146.85	7.84	0.273	-0.02	4.07	0.1	0.213	3.99287	-0.0771301	0.000555137	0.00154062	0.00363638	0.285	7.90022
6147.83	7.84	0.273	-0.021	4.02	0.1	0.213	3.99287	-0.0271301	0.000555137	0.00153425	0.00362364	0.285	7.90022
6148.81	7.84	0.273	-0.022	3.975	0.1	0.213	3.99287	0.0178699	0.000555137	0.00152789	0.00361091	0.285	7.90022
6149.8	7.84	0.273	-0.023	3.92	0.1	0.213	3.99287	0.0728699	0.000555137	0.00152152	0.00359818	0.285	7.90022
6150.78	7.84	0.271	-0.024	3.875	0.1	0.213	3.99287	0.11787	0.000536319	0.00151516	0.00356663	0.29	8.03882
6151.77	7.84	0.273	-0.025	3.82	0.1	0.213	3.99287	0.17287	0.000555137	0.00150879	0.00357272	0.29	8.03882
6152.76	7.84	0.273	-0.026	3.77	0.1	0.213	3.99287	0.22287	0.000555137	0.00150242	0.00355998	0.29	8.03882
6153.85	7.84	0.273	-0.027	3.715	0.1	0.213	3.99287	0.27787	0.000555137	0.00149606	0.00354725	0.29	8.03882
6154.83	7.84	0.273	-0.028	3.665	0.1	0.213	3.99287	0.32787	0.000555137	0.00148969	0.00353452	0.29	8.03882
6155.81	7.84	0.273	-0.029	3.615	0.1	0.213	3.99287	0.37787	0.000555137	0.00148332	0.00352179	0.29	8.03882
6156.8	7.84	0.273	-0.03	3.57	0.1	0.213	3.99287	0.42287	0.000555137	0.00147696	0.00350905	0.29	8.03882
6157.78	7.84	0.273	-0.031	3.52	0.1	0.213	3.99287	0.47287	0.000555137	0.00147059	0.00349632	0.29	8.03882
6158.77	7.84	0.273	-0.032	3.47	0.1	0.213	3.99287	0.52287	0.000555137	0.00146423	0.00348359	0.29	8.03882
6159.76	7.84	0.273	-0.034	3.425	0.1	0.213	3.99287	0.56787	0.000555137	0.00145149	0.00345812	0.29	8.03882
6160.85	7.84	0.273	-0.035	3.375	0.1	0.213	3.99287	0.61787	0.000555137	0.00144513	0.00344539	0.29	8.03882
6161.83	7.84	0.273	-0.036	3.315	0.1	0.213	3.99287	0.67787	0.000555137	0.00143876	0.00343266	0.29	8.03882
6162.81	7.84	0.273	-0.037	3.275	0.1	0.213	3.99287	0.71787	0.000555137	0.00143239	0.00341993	0.295	8.17742
6163.8	7.84	0.273	-0.038	3.225	0.1	0.213	3.99287	0.76787	0.000555137	0.00142603	0.00340719	0.295	8.17742
6164.78	7.84	0.273	-0.039	3.17	0.1	0.213	3.99287	0.82287	0.000555137	0.00141966	0.00339446	0.295	8.17742
6165.77	7.84	0.273	-0.041	3.125	0.1	0.213	3.99287	0.86787	0.000555137	0.00140693	0.003369	0.295	8.17742
6166.75	7.84	0.273	-0.042	3.08	0.1	0.213	3.99287	0.91287	0.000555137	0.00140056	0.00335626	0.295	8.17742
6167.85	7.84	0.273	-0.043	3.02	0.1	0.213	3.99287	0.97287	0.000555137	0.0013942	0.00334353	0.295	8.17742
6168.83	7.84	0.273	-0.045	2.97	0.1	0.213	3.99287	1.02287	0.000555137	0.00138146	0.00331807	0.295	8.17742
6169.81	7.84	0.273	-0.046	2.915	0.1	0.213	3.99287	1.07787	0.000555137	0.0013751	0.00330533	0.295	8.17742
6170.8	7.84	0.273	-0.047	2.875	0.1	0.213	3.99287	1.11787	0.000555137	0.00136873	0.0032926	0.295	8.17742
6171.79	7.84	0.273	-0.048	2.82	0.1	0.213	3.99287	1.17287	0.000555137	0.00136237	0.00327987	0.295	8.17742
6172.77	7.84	0.273	-0.049	2.77	0.1	0.213	3.99287	1.22287	0.000555137	0.001356	0.00326714	0.3	8.31602
6173.75	7.86	0.273	-0.05	2.72	0.1	0.213	4.00306	1.28306	0.000555137	0.00134963	0.00325441	0.3	8.31602
6174.84	7.84	0.273	-0.051	2.67	0.1	0.213	3.99287	1.32287	0.000555137	0.00134327	0.00324167	0.3	8.31602
6175.83	7.84	0.273	-0.053	2.62	0.1	0.213	3.99287	1.37287	0.000555137	0.00133054	0.00321621	0.3	8.31602
6176.81	7.84	0.273	-0.054	2.565	0.1	0.213	3.99287	1.42787	0.000555137	0.00132417	0.00320348	0.3	8.31602
6177.8	7.84	0.273	-0.055	2.525	0.1	0.213	3.99287	1.46787	0.000555137	0.0013178	0.00319074	0.3	8.31602
6178.79	7.84	0.273	-0.056	2.48	0.1	0.213	3.99287	1.51287	0.000555137	0.00131144	0.00317801	0.3	8.31602
6179.77	7.84	0.274	-0.057	2.44	0.1	0.213	3.99287	1.55287	0.000564546	0.00130507	0.00317469	0.3	8.31602
6180.75	7.84	0.274	-0.059	2.385	0.1	0.213	3.99287	1.60787	0.000564546	0.00129234	0.00314922	0.305	8.45462
6181.85	7.86	0.273	-0.061	2.335	0.1	0.213	4.00306	1.66806	0.000555137	0.00127961	0.00311435	0.305	8.45462
6182.83	7.84	0.274	-0.063	2.275	0.1	0.213	3.99287	1.71787	0.000564546	0.00126687	0.00309829	0.305	8.45462
6183.81	7.84	0.274	-0.065	2.23	0.1	0.213	3.99287	1.76287	0.000564546	0.00125414	0.00307283	0.305	8.45462
6184.8	7.84	0.273	-0.068	2.17	0.1	0.213	3.99287	1.82287	0.000555137	0.00123504	0.00302522	0.305	8.45462
6185.78	7.86	0.274	-0.07	2.165	0.1	0.213	4.00306	1.83806	0.000564546	0.00122231	0.00300917	0.305	8.45462
6186.77	7.86	0.274	-0.07	2.195	0.1	0.213	4.00306	1.80806	0.000564546	0.00122231	0.00300917	0.31	8.59322
6187.75	7.86	0.274	-0.07	2.195	0.1	0.213	4.00306	1.80806	0.000564546	0.00122231	0.00300917	0.31	8.59322
6188.85	7.86	0.274	-0.07	2.235	0.1	0.213	4.00306	1.76806	0.000564546	0.00122231	0.00300917	0.31	8.59322
6189.83	7.86	0.274	-0.069	2.24	0.1	0.213	4.00306	1.76306	0.000564546	0.00122868	0.0030219	0.31	8.59322
6190.81	7.86	0.274	-0.069	2.22	0.1	0.213	4.00306	1.78306	0.000564546	0.00122868	0.0030219	0.31	8.59322
6191.8	7.86	0.274	-0.07	2.195	0.1	0.213	4.00306	1.80806	0.000564546	0.00122231	0.00300917	0.31	8.59322
6192.78	7.86	0.274	-0.07	2.165	0.1	0.213	4.00306	1.83806	0.000564546	0.00122231	0.00300917	0.31	8.59322
6193.77	7.86	0.273	-0.071	2.14	0.1	0.213	4.00306	1.86306	0.000555137	0.00121594	0.00298702	0.31	8.59322
6194.76	7.86	0.274	-0.071	2.12	0.1	0.213	4.00306	1.88306	0.000564546	0.00121594	0.00299643	0.31	8.59322
6195.85	7.86	0.274	-0.072	2.1	0.1	0.213	4.00306	1.90306	0.000564546	0.00120958	0.0029837	0.31	8.59322
6196.83	7.86	0.274	-0.073	2.09	0.1	0.213	4.00306	1.91306	0.000564546	0.00120321	0.00297097	0.31	8.59322
6197.81	7.86	0.273	-0.073	2.08	0.1	0.213	4.00306	1.92306	0.000555137	0.00120321	0.00296156	0.31	8.59322
6198.8	7.86	0.274	-0.074	2.075	0.1	0.213	4.00306	1.92806	0.000564546	0.00119685	0.00295824	0.31	8.59322
6199.78	7.86	0.274	-0.074	2.065	0.1	0.213	4.00306	1.93806	0.000564546	0.00119685	0.00295824	0.315	8.73182
6200.77	7.86	0.274	-0.074	2.06	0.1	0.213	4.00306	1.94306	0.000564546	0.00119685	0.00295824	0.315	8.73182
6201.75	7.86	0.274	-0.075	2.055	0.1	0.213	4.00306	1.94806	0.000564546	0.00119048	0.0029455	0.315	8.73182
6202.84	7.86	0.274	-0.075	2.05	0.1	0.213	4.00306	1.95306	0.000564546	0.00119048	0.0029455	0.315	8.73182
6203.83	7.84	0.274	-0.075	2.045	0.1	0.213	3.99287	1.94787	0.000564546	0.00119048	0.0029455	0.315	8.73182
6204.81	7.84	0.274	-0.076	2.04	0.1	0.213	3.99287	1.95287	0.000564546	0.00118411	0.00293277	0.315	8.73182
6205.8	7.84	0.274	-0.076	2.035	0.1	0.213	3.99287	1.95787	0.000564546	0.00118411	0.00293277	0.315	8.73182
6206.78	7.84	0.274	-0.076	2.03	0.1	0.213	3.99287	1.96287	0.000564546	0.00118411	0.00293277	0.315	8.73182
6207.77	7.84	0.274	-0.076	2.025	0.1	0.213	3.99287	1.96787	0.000564546	0.00118411	0.00293277	0.315	8.73182
6208.75	7.84	0.274	-0.076	2.02	0.1	0.213	3.99287	1.97287	0.000564546	0.00118411	0.00293277	0.315	8.73182
6209.84	7.84	0.274	-0.077	2.015	0.1	0.213	3.99287	1.97787	0.000564546	0.00117775	0.00292004	0.315	8.73182
6210.83	7.84	0.274	-0.077	2.01	0.1	0.213	3.99287	1.98287	0.000564546	0.00117775	0.00292004	0.315	8.73182
6211.81	7.84	0.274	-0.077	2.01	0.1	0.213	3.99287	1.98287	0.000564546	0.00117775	0.00292004	0.315	8.73182
6212.8	7.84	0.274	-0.077	2	0.1	0.213	3.99287	1.99287	0.000564546	0.00117775	0.00292004	0.315	8.73182
6213.78	7.84	0.274	-0.077	2	0.1	0.213	3.99287	1.99287	0.000564546	0.00117775	0.00292004	0.315	8.73182
6214.77	7.84	0.274	-0.078	2	0.1	0.213	3.99287	1.99287	0.000564546	0.00117138	0.00290731	0.315	8.73182
6215.75	7.84	0.274	-0.078	2	0.1	0.213	3.99287	1.99287	0.000564546	0.00117138	0.00290731	0.315	8.73182
6216.85	7.84	0.274	-0.078	2	0.1	0.213	3.99287	1.99287	0.000564546	0.00117138	0.00290731	0.315	8.73182
6217.83	7.84	0.274	-0.078	2	0.1	0.213	3.99287	1.99287	0.000564546	0.00117138	0.00290731	0.315	8.73182
6218.81	7.84	0.274	-0.078	2	0.1	0.213	3.99287	1.99287	0.000564546	0.00117138	0.00290731	0.315	8.73182
6219.8	7.84	0.274	-0.078	2	0.1	0.213	3.99287	1.99287	0.000564546	0.00117138	0.00290731	0.315	8.73182
6220.78	7.84	0.274	-0.078	2	0.1	0.213	3.99287	1.99287	0.000564546	0.00117138	0.00290731	0.315	8.73182
6221.77	7.86	0.274	-0.078	2	0.1	0.213	4.00306	2.00306	0.000564546	0.00117138	0.00290731	0.32	8.87042
6222.75	7.86	0.274	-0.078	2	0.1	0.213	4.00306	2.00306	0.000564546	0.00117138	0.00290731	0.32	8.87042
6223.85	7.86	0.274	-0.078	2	0.1	0.213	4.00306	2.00306	0.000564546	0.00117138	0.00290731	0.315	8.73182
6224.83	7.86	0.274	-0.078	2	0.1	0.213	4.00306	2.00306	0.000564546	0.00117138	0.00290731	0.315	8.73182
6225.81	7.86	0.274	-0.078	2	0.1	0.213	4.00306	2.00306	0.000564546	0.00117138	0.00290731	0.315	8.73182
6226.8	7.86	0.274	-0.078	2	0.1	0.213	4.00306	2.00306	0.000564546	0.00117138	0.00290731	0.32	8.87042
6227.79	7.86	0.274	-0.078	2	0.1	0.213	4.00306	2.00306	0.000564546	0.00117138	0.00290731	0.315	8.73182
6228.77	7.86	0.274	-0.078	2	0.1	0.213	4.00306	2.00306	0.000564546	0.00117138	0.00290731	0.32	8.87042
6229.75	7.86	0.274	-0.078	2	0.1	0.213	4.00306	2.00306	0.000564546	0.00117138	0.00290731	0.32	8.87042
6230.84	7.86	0.274	-0.078	2	0.1	0.213	4.00306	2.00306	0.000564546	0.00117138	0.00290731	0.32	8.87042
6231.83	7.84	0.274	-0.078	2	0.1	0.213	3.99287	1.99287	0.000564546	0.00117138	0.00290731	0.32	8.87042
6232.81	7.84	0.274	-0.078	2	0.1	0.213	3.99287	1.99287	0.000564546	0.00117138	0.00290731	0.32	8.87042
6233.8	7.84	0.274	-0.078	2	0.1	0.213	3.99287	1.99287	0.000564546	0.00117138	0.00290731	0.315	8.73182
6234.78	7.84	0.274	-0.078	2	0.1	0.213	3.99287	1.99287	0.000564546	0.00117138	0.00290731	0.32	8.87042
6235.77	7.84	0.274	-0.078	2	0.1	0.213	3.99287	1.99287	0.000564546	0.00117138	0.00290731	0.32	8.87042
6236.76	7.86	0.274	-0.078	2	0.1	0.213	4.00306	2.00306	0.000564546	0.00117138	0.00290731	0.32	8.87042
6237.85	7.84	0.274	-0.078	2	0.1	0.213	3.99287	1.99287	0.000564546	0.00117138	0.00290731	0.32	8.87042
6238.83	7.84	0.274	-0.078	2	0.1	0.213	3.99287	1.99287	0.000564546	0.00117138	0.00290731	0.32	8.87042
6239.81	7.84	0.274	-0.078	2	0.1	0.213	3.99287	1.99287	0.000564546	0.00117138	0.00290731	0.32	8.87042
6240.8	7.84	0.274	-0.078	2	0.1	0.213	3.99287	1.99287	0.000564546	0.00117138	0.00290731	0.32	8.87042
6241.78	7.84	0.274	-0.078	2	0.1	0.213	3.99287	1.99287	0.000564546	0.00117138	0.00290731	0.32	8.87042
6242.77	7.84	0.274	-0.078	2	0.1	0.213	3.99287	1.99287	0.000564546	0.00117138	0.00290731	0.32	8.87042
6243.76	7.84	0.274	-0.078	2	0.1	0.213	3.99287	1.99287	0.000564546	0.00117138	0.00290731	0.32	8.87042
6244.85	7.84	0.274	-0.078	2	0.1	0.213	3.99287	1.99287	0.000564546	0.00117138	0.00290731	0.32	8.87042
6245.83	7.84	0.274	-0.078	2	0.1	0.213	3.99287	1.99287	0.000564546	0.00117138	0.00290731	0.32	8.87042
6246.81	7.84	0.274	-0.078	2	0.1	0.213	3.99287	1.99287	0.000564546	0.00117138	0.00290731	0.32	8.87042
6247.8	7.84	0.274	-0.078	2	0.1	0.213	3.99287	1.99287	0.000564546	0.00117138	0.00290731	0.32	8.87042
6248.79	7.84	0.274	-0.078	2	0.1	0.213	3.99287	1.99287	0.000564546	0.00117138	0.00290731	0.32	8.87042
6249.77	7.84	0.274	-0.078	2	0.1	0.213	3.99287	1.99287	0.000564546	0.00117138	0.00290731	0.32	8.87042
6250.75	7.84	0.274	-0.078	2	0.1	0.213	3.99287	1.99287	0.000564546	0.00117138	0.00290731	0.32	8.87042
6251.85	7.84	0.274	-0.078	2	0.1	0.213	3.99287	1.99287	0.000564546	0.00117138	0.00290731	0.32	8.87042
6252.83	7.84	0.274	-0.078	2	0.1	0.213	3.99287	1.99287	0.000564546	0.00117138	0.00290731	0.32	8.87042
6253.81	7.84	0.274	-0.078	2	0.1	0.213	3.99287	1.99287	0.000564546	0.00117138	0.00290731	0.32	8.87042
6254.8	7.84	0.274	-0.078	2	0.1	0.213	3.99287	1.99287	0.000564546	0.00117138	0.00290731	0.32	8.87042
6255.78	7.84	0.274	-0.078	2	0.1	0.213	3.99287	1.99287	0.000564546	0.00117138	0.00290731	0.32	8.87042
6256.77	7.84	0.274	-0.078	2	0.1	0.213	3.99287	1.99287	0.000564546	0.00117138	0.00290731	0.32	8.87042
6257.76	7.84	0.274	-0.078	2	0.1	0.213	3.99287	1.99287	0.000564546	0.00117138	0.00290731	0.32	8.87042
6258.85	7.84	0.274	-0.078	2	0.1	0.213	3.99287	1.99287	0.000564546	0.00117138	0.00290731	0.32	8.87042
6259.83	7.84	0.274	-0.078	2	0.1	0.213	3.99287	1.99287	0.000564546	0.00117138	0.00290731	0.32	8.87042
6260.81	7.84	0.274	-0.078	2	0.1	0.213	3.99287	1.99287	0.000564546	0.00117138	0.00290731	0.32	8.87042
6261.8	7.84	0.274	-0.078	2	0.1	0.213	3.99287	1.99287	0.000564546	0.00117138	0.00290731	0.32	8.87042
6262.78	7.84	0.274	-0.078	2	0.1	0.213	3.99287	1.99287	0.000564546	0.00117138	0.00290731	0.32	8.87042
6263.77	7.84	0.274	-0.078	2	0.1	0.213	3.99287	1.99287	0.000564546	0.00117138	0.00290731	0.32	8.87042
6264.75	7.84	0.274	-0.078	2	0.1	0.213	3.99287	1.99287	0.000564546	0.00117138	0.00290731	0.32	8.87042
6265.85	7.84	0.274	-0.078	2	0.1	0.213	3.99287	1.99287	0.000564546	0.00117138	0.00290731	0.32	8.87042
6266.83	7.84	0.274	-0.078	2	0.1	0.213	3.99287	1.99287	0.000564546	0.00117138	0.00290731	0.32	8.87042
6267.81	7.84	0.274	-0.078	2	0.1	0.213	3.99287	1.99287	0.000564546	0.00117138	0.00290731	0.32	8.87042
6268.8	7.84	0.274	-0.078	2	0.1	0.213	3.99287	1.99287	0.000564546	0.00117138	0.00290731	0.32	8.87042
6269.78	7.84	0.274	-0.078	2	0.1	0.213	3.99287	1.99287	0.000564546	0.00117138	0.00290731	0.32	8.87042
6270.77	7.84	0.274	-0.078	2	0.1	0.213	3.99287	1.99287	0.000564546	0.00117138	0.00290731	0.32	8.87042
6271.75	7.84	0.274	-0.078	2	0.1	0.213	3.99287	1.99287	0.000564546	0.00117138	0.00290731	0.32	8.87042
6272.85	7.84	0.274	-0.078	2	0.1	0.213	3.99287	1.99287	0.000564546	0.00117138	0.00290731	0.32	8.87042
6273.83	7.84	0.274	-0.078	2	0.1	0.213	3.99287	1.99287	0.000564546	0.00117138	0.00290731	0.32	8.87042
6274.81	7.84	0.274	-0.078	2	0.1	0.213	3.99287	1.99287	0.000564546	0.00117138	0.00290731	0.32	8.87042
6275.8	7.84	0.274	-0.078	2	0.1	0.213	3.99287	1.99287	0.000564546	0.00117138	0.00290731	0.32	8.87042
6276.79	7.84	0.274	-0.078	2	0.1	0.213	3.99287	1.99287	0.000564546	0.00117138	0.00290731	0.32	8.87042
6277.77	7.84	0.274	-0.078	2	0.1	0.213	3.99287	1.99287	0.000564546	0.00117138	0.00290731	0.32	8.87042
6278.75	7.84	0.274	-0.078	2	0.1	0.213	3.99287	1.99287	0.000564546	0.00117138	0.00290731	0.32	8.87042
6279.84	7.84	0.274	-0.078	2	0.1	0.213	3.99287	1.99287	0.000564546	0.00117138	0.00290731	0.32	8.87042
6280.83	7.84	0.274	-0.078	2	0.1	0.213	3.99287	1.99287	0.000564546	0.00117138	0.00290731	0.32	8.87042
6281.81	7.84	0.274	-0.078	2	0.1	0.213	3.99287	1.99287	0.000564546	0.00117138	0.00290731	0.32	8.87042
6282.8	7.84	0.274	-0.078	2	0.1	0.213	3.99287	1.99287	0.000564546	0.00117138	0.00290731	0.32	8.87042
6283.78	7.84	0.274	-0.078	2	0.1	0.213	3.99287	1.99287	0.000564546	0.00117138	0.00290731	0.32	8.87042
6284.77	7.84	0.274	-0.078	2	0.1	0.213	3.99287	1.99287	0.000564546	0.00117138	0.00290731	0.32	8.87042
6285.75	7.84	0.274	-0.078	2	0.1	0.213	3.99287	1.99287	0.000564546	0.00117138	0.00290731	0.32	8.87042
6286.85	7.84	0.274	-0.078	2	0.1	0.213	3.99287	1.99287	0.000564546	0.00117138	0.00290731	0.32	8.87042
6287.83	7.84	0.274	-0.078	2	0.1	0.213	3.99287	1.99287	0.000564546	0.00117138	0.00290731	0.32	8.87042
6288.81	7.84	0.274	-0.078	2	0.1	0.213	3.99287	1.99287	0.000564546	0.00117138	0.00290731	0.32	8.87042
6289.8	7.86	0.274	-0.078	2	0.1	0.213	4.00306	2.00306	0.000564546	0.00117138	0.00290731	0.32	8.87042
6290.79	7.86	0.274	-0.078	2	0.1	0.213	4.00306	2.00306	0.000564546	0.00117138	0.00290731	0.32	8.87042
6291.77	7.86	0.274	-0.078	2	0.1	0.213	4.00306	2.00306	0.000564546	0.00117138	0.00290731	0.32	8.87042
6292.75	7.86	0.274	-0.078	2	0.1	0.213	4.00306	2.00306	0.000564546	0.00117138	0.00290731	0.32	8.87042
6293.85	7.86	0.274	-0.078	2	0.1	0.213	4.00306	2.00306	0.000564546	0.00117138	0.00290731	0.32	8.87042
6294.83	7.86	0.273	-0.078	2	0.1	0.213	4.00306	2.00306	0.000555137	0.00117138	0.0028979	0.32	8.87042
6295.81	7.86	0.274	-0.078	2	0.1	0.213	4.00306	2.00306	0.000564546	0.00117138	0.00290731	0.32	8.87042
6296.8	7.86	0.274	-0.078	2	0.1	0.213	4.00306	2.00306	0.000564546	0.00117138	0.00290731	0.32	8.87042
6297.79	7.86	0.274	-0.078	2	0.1	0.213	4.00306	2.00306	0.000564546	0.00117138	0.00290731	0.32	8.87042
6298.77	7.86	0.274	-0.078	2	0.1	0.213	4.00306	2.00306	0.000564546	0.00117138	0.00290731	0.32	8.87042
6299.75	7.86	0.274	-0.078	2	0.1	0.213	4.00306	2.00306	0.000564546	0.00117138	0.00290731	0.32	8.87042
6300.84	7.86	0.274	-0.078	2	0.1	0.213	4.00306	2.00306	0.000564546	0.00117138	0.00290731	0.32	8.87042
6301.83	7.86	0.274	-0.078	2	0.1	0.213	4.00306	2.00306	0.000564546	0.00117138	0.00290731	0.32	8.87042
6302.81	7.86	0.274	-0.078	2	0.1	0.213	4.00306	2.00306	0.000564546	0.00117138	0.00290731	0.32	8.87042
6303.8	7.86	0.274	-0.078	2	0.1	0.213	4.00306	2.00306	0.000564546	0.00117138	0.00290731	0.32	8.87042
6304.78	7.84	0.274	-0.078	2	0.1	0.213	3.99287	1.99287	0.000564546	0.00117138	0.00290731	0.32	8.87042
6305.77	7.84	0.274	-0.078	2	0.1	0.213	3.99287	1.99287	0.000564546	0.00117138	0.00290731	0.32	8.87042
6306.75	7.84	0.273	-0.078	2	0.1	0.213	3.99287	1.99287	0.000555137	0.00117138	0.0028979	0.32	8.87042
6307.84	7.84	0.273	-0.078	2	0.1	0.213	3.99287	1.99287	0.000555137	0.00117138	0.0028979	0.32	8.87042
6308.83	7.84	0.274	-0.078	2	0.1	0.213	3.99287	1.99287	0.000564546	0.00117138	0.00290731	0.32	8.87042
6309.81	7.84	0.274	-0.078	2	0.1	0.213	3.99287	1.99287	0.000564546	0.00117138	0.00290731	0.32	8.87042
6310.8	7.84	0.274	-0.078	2	0.1	0.213	3.99287	1.99287	0.000564546	0.00117138	0.00290731	0.32	8.87042
6311.78	7.84	0.274	-0.078	2	0.1	0.213	3.99287	1.99287	0.000564546	0.00117138	0.00290731	0.32	8.87042
6312.77	7.84	0.274	-0.078	2	0.1	0.213	3.99287	1.99287	0.000564546	0.00117138	0.00290731	0.32	8.87042
6313.76	7.84	0.274	-0.078	2	0.1	0.213	3.99287	1.99287	0.000564546	0.00117138	0.00290731	0.32	8.87042
6314.84	7.84	0.273	-0.078	2	0.1	0.213	3.99287	1.99287	0.000555137	0.00117138	0.0028979	0.32	8.87042
6315.83	7.84	0.274	-0.078	2	0.1	0.213	3.99287	1.99287	0.000564546	0.00117138	0.00290731	0.32	8.87042
6316.81	7.84	0.274	-0.078	2	0.1	0.213	3.99287	1.99287	0.000564546	0.00117138	0.00290731	0.32	8.87042
6317.8	7.84	0.274	-0.078	2	0.1	0.213	3.99287	1.99287	0.000564546	0.00117138	0.00290731	0.315	8.73182
6318.79	7.84	0.274	-0.078	2	0.1	0.213	3.99287	1.99287	0.000564546	0.00117138	0.00290731	0.32	8.87042
6319.77	7.84	0.274	-0.078	2	0.1	0.213	3.99287	1.99287	0.000564546	0.00117138	0.00290731	0.32	8.87042
6320.76	7.84	0.274	-0.078	2	0.1	0.213	3.99287	1.99287	0.000564546	0.00117138	0.00290731	0.32	8.87042
6321.84	7.84	0.274	-0.078	2	0.1	0.213	3.99287	1.99287	0.000564546	0.00117138	0.00290731	0.32	8.87042
6322.83	7.84	0.273	-0.078	2	0.1	0.213	3.99287	1.99287	0.000555137	0.00117138	0.0028979	0.32	8.87042
6323.81	7.84	0.274	-0.078	2	0.1	0.213	3.99287	1.99287	0.000564546	0.00117138	0.00290731	0.32	8.87042
6324.8	7.84	0.274	-0.078	2	0.1	0.213	3.99287	1.99287	0.000564546	0.00117138	0.00290731	0.32	8.87042
6325.79	7.84	0.274	-0.078	2	0.1	0.213	3.99287	1.99287	0.000564546	0.00117138	0.00290731	0.32	8.87042
6326.77	7.86	0.274	-0.078	2	0.1	0.213	4.00306	2.00306	0.000564546	0.00117138	0.00290731	0.32	8.87042
6327.75	7.84	0.273	-0.078	2	0.1	0.213	3.99287	1.99287	0.000555137	0.00117138	0.0028979	0.32	8.87042
6328.84	7.86	0.274	-0.078	2	0.1	0.213	4.00306	2.00306	0.000564546	0.00117138	0.00290731	0.32	8.87042
6329.83	7.86	0.274	-0.078	2	0.1	0.213	4.00306	2.00306	0.000564546	0.00117138	0.00290731	0.315	8.73182
6330.81	7.86	0.274	-0.078	2	0.1	0.213	4.00306	2.00306	0.000564546	0.00117138	0.00290731	0.32	8.87042
6331.8	7.86	0.274	-0.078	2	0.1	0.213	4.00306	2.00306	0.000564546	0.00117138	0.00290731	0.32	8.87042
6332.79	7.86	0.274	-0.078	2	0.1	0.213	4.00306	2.00306	0.000564546	0.00117138	0.00290731	0.32	8.87042
6333.77	7.86	0.274	-0.078	2	0.1	0.213	4.00306	2.00306	0.000564546	0.00117138	0.00290731	0.32	8.87042
6334.75	7.88	0.274	-0.078	2	0.1	0.213	4.01324	2.01324	0.000564546	0.00117138	0.00290731	0.32	8.87042
6335.85	7.94	0.274	-0.078	2	0.1	0.213	4.0438	2.0438	0.000564546	0.00117138	0.00290731	0.32	8.87042
6336.83	7.98	0.274	-0.078	2	0.1	0.213	4.06417	2.06417	0.000564546	0.00117138	0.00290731	0.315	8.73182
6337.81	8.02	0.276	-0.078	2	0.1	0.213	4.08454	2.08454	0.000583365	0.00117138	0.00292613	0.32	8.87042
6338.8	8.08	0.276	-0.078	2	0.1	0.213	4.1151	2.1151	0.000583365	0.00117138	0.00292613	0.32	8.87042
6339.79	8.12	0.276	-0.078	2	0.1	0.213	4.13547	2.13547	0.000583365	0.00117138	0.00292613	0.32	8.87042
6340.77	8.2	0.276	-0.078	2	0.1	0.213	4.17622	2.17622	0.000583365	0.00117138	0.00292613	0.32	8.87042
6341.76	8.22	0.276	-0.078	2	0.1	0.213	4.1864	2.1864	0.000583365	0.00117138	0.00292613	0.32	8.87042
6342.85	8.28	0.278	-0.078	2	0.1	0.213	4.21696	2.21696	0.000602183	0.00117138	0.00294494	0.32	8.87042
6343.83	8.32	0.278	-0.078	2	0.1	0.213	4.23733	2.23733	0.000602183	0.00117138	0.00294494	0.32	8.87042
6344.81	8.38	0.279	-0.078	2	0.1	0.213	4.26789	2.26789	0.000611592	0.00117138	0.00295435	0.32	8.87042
6345.8	8.42	0.278	-0.078	2	0.1	0.213	4.28826	2.28826	0.000602183	0.00117138	0.00294494	0.32	8.87042
6346.78	8.48	0.279	-0.078	2	0.1	0.213	4.31882	2.31882	0.000611592	0.00117138	0.00295435	0.32	8.87042
6347.77	8.52	0.279	-0.078	2	0.1	0.213	4.33919	2.33919	0.000611592	0.00117138	0.00295435	0.32	8.87042
6348.76	8.58	0.279	-0.078	2	0.1	0.213	4.36975	2.36975	0.000611592	0.00117138	0.00295435	0.32	8.87042
6349.84	8.62	0.281	-0.078	2	0.1	0.213	4.39012	2.39012	0.00063041	0.00117138	0.00297317	0.315	8.73182
6350.83	8.7	0.281	-0.078	2	0.1	0.213	4.43086	2.43086	0.00063041	0.00117138	0.00297317	0.32	8.87042
6351.81	8.72	0.281	-0.078	2	0.1	0.213	4.44105	2.44105	0.00063041	0.00117138	0.00297317	0.32	8.87042
6352.8	8.78	0.283	-0.078	2	0.1	0.213	4.47161	2.47161	0.000649228	0.00117138	0.00299199	0.32	8.87042
6353.78	8.82	0.283	-0.078	2	0.1	0.213	4.49198	2.49198	0.000649228	0.00117138	0.00299199	0.32	8.87042
6354.77	8.88	0.284	-0.078	2	0.1	0.213	4.52254	2.52254	0.000658638	0.00117138	0.0030014	0.315	8.73182
6355.75	8.92	0.284	-0.078	2	0.1	0.213	4.54291	2.54291	0.000658638	0.00117138	0.0030014	0.32	8.87042
6356.84	8.98	0.286	-0.078	2	0.1	0.213	4.57347	2.57347	0.000677456	0.00117138	0.00302022	0.315	8.73182
6357.83	9.02	0.286	-0.078	2	0.1	0.213	4.59384	2.59384	0.000677456	0.00117138	0.00302022	0.32	8.87042
6358.81	9.08	0.286	-0.078	2	0.1	0.213	4.6244	2.6244	0.000677456	0.00117138	0.00302022	0.32	8.87042
6359.8	9.14	0.288	-0.078	2	0.1	0.213	4.65495	2.65495	0.000696274	0.00117138	0.00303903	0.32	8.87042
6360.78	9.18	0.288	-0.078	2	0.1	0.213	4.67532	2.67532	0.000696274	0.00117138	0.00303903	0.315	8.73182
6361.77	9.22	0.288	-0.078	2	0.1	0.213	4.6957	2.6957	0.000696274	0.00117138	0.00303903	0.315	8.73182
6362.76	9.28	0.289	-0.078	2	0.1	0.213	4.72625	2.72625	0.000705683	0.00117138	0.00304844	0.315	8.73182
6363.85	9.32	0.291	-0.078	2	0.1	0.213	4.74663	2.74663	0.000724501	0.00117138	0.00306726	0.315	8.73182
6364.83	9.4	0.291	-0.078	2	0.1	0.213	4.78737	2.78737	0.000724501	0.00117138	0.00306726	0.315	8.73182
6365.81	9.42	0.291	-0.078	2	0.1	0.213	4.79756	2.79756	0.000724501	0.00117138	0.00306726	0.315	8.73182
6366.8	9.48	0.293	-0.078	2	0.1	0.213	4.82811	2.82811	0.00074332	0.00117138	0.00308608	0.315	8.73182
6367.79	9.52	0.293	-0.078	2	0.1	0.213	4.84848	2.84848	0.00074332	0.00117138	0.00308608	0.315	8.73182
6368.77	9.58	0.294	-0.078	2	0.1	0.213	4.87904	2.87904	0.000752729	0.00117138	0.00309549	0.315	8.73182
6369.76	9.62	0.296	-0.078	2	0.1	0.213	4.89941	2.89941	0.000771547	0.00117138	0.00311431	0.315	8.73182
6370.85	9.7	0.298	-0.078	2	0.1	0.213	4.94016	2.94016	0.000790365	0.00117138	0.00313313	0.315	8.73182
6371.83	9.74	0.298	-0.078	2	0.1	0.213	4.96053	2.96053	0.000790365	0.00117138	0.00313313	0.315	8.73182
6372.81	9.8	0.299	-0.079	2	0.1	0.213	4.99109	2.99109	0.000799774	0.00116501	0.0031298	0.315	8.73182
6373.8	9.84	0.299	-0.079	2	0.1	0.213	5.01146	3.01146	0.000799774	0.00116501	0.0031298	0.315	8.73182
6374.79	9.88	0.301	-0.079	2	0.1	0.213	5.03183	3.03183	0.000818592	0.00116501	0.00314862	0.315	8.73182
6375.77	9.92	0.301	-0.079	2	0.1	0.213	5.0522	3.0522	0.000818592	0.00116501	0.00314862	0.315	8.73182
6376.76	9.98	0.303	-0.079	2	0.1	0.213	5.08276	3.08276	0.000837411	0.00116501	0.00316744	0.315	8.73182
6377.84	10.02	0.303	-0.079	2	0.1	0.213	5.10313	3.10313	0.000837411	0.00116501	0.00316744	0.315	8.73182
6378.83	10.1	0.304	-0.079	2	0.1	0.213	5.14388	3.14388	0.00084682	0.00116501	0.00317685	0.31	8.59322
6379.81	10.14	0.304	-0.079	2	0.1	0.213	5.16425	3.16425	0.00084682	0.00116501	0.00317685	0.31	8.59322
6380.8	10.18	0.306	-0.079	2	0.1	0.213	5.18462	3.18462	0.000865638	0.00116501	0.00319567	0.31	8.59322
6381.78	10.22	0.306	-0.079	2	0.1	0.213	5.20499	3.20499	0.000865638	0.00116501	0.00319567	0.31	8.59322
6382.77	10.28	0.308	-0.079	2	0.1	0.213	5.23555	3.23555	0.000884456	0.00116501	0.00321448	0.31	8.59322
6383.75	10.32	0.308	-0.08	2	0.1	0.213	5.25592	3.25592	0.000884456	0.00115865	0.00320175	0.31	8.59322
6384.84	10.38	0.309	-0.08	2	0.1	0.213	5.28648	3.28648	0.000893865	0.00115865	0.00321116	0.31	8.59322
6385.83	10.42	0.311	-0.08	2	0.1	0.213	5.30685	3.30685	0.000912683	0.00115865	0.00322998	0.31	8.59322
6386.81	10.48	0.311	-0.08	2	0.1	0.213	5.33741	3.33741	0.000912683	0.00115865	0.00322998	0.31	8.59322
6387.8	10.52	0.313	-0.08	2	0.1	0.213	5.35778	3.35778	0.000931502	0.00115865	0.0032488	0.31	8.59322
6388.78	10.58	0.314	-0.08	2	0.1	0.213	5.38834	3.38834	0.000940911	0.00115865	0.00325821	0.31	8.59322
6389.77	10.62	0.314	-0.08	2	0.1	0.213	5.40871	3.40871	0.000940911	0.00115865	0.00325821	0.31	8.59322
6390.75	10.68	0.316	-0.08	2	0.1	0.213	5.43927	3.43927	0.000959729	0.00115865	0.00327702	0.31	8.59322
6391.85	10.72	0.316	-0.08	2	0.1	0.213	5.45964	3.45964	0.000959729	0.00115865	0.00327702	0.31	8.59322
6392.83	10.78	0.318	-0.081	2	0.1	0.213	5.4902	3.4902	0.000978547	0.00115228	0.00328311	0.31	8.59322
6393.81	10.82	0.32	-0.081	2	0.1	0.213	5.51057	3.51057	0.000997365	0.00115228	0.00330193	0.31	8.59322
6394.8	10.9	0.32	-0.081	2	0.1	0.213	5.55131	3.55131	0.000997365	0.00115228	0.00330193	0.305	8.45462
6395.78	10.92	0.321	-0.081	2	0.1	0.213	5.5615	3.5615	0.00100677	0.00115228	0.00331134	0.305	8.45462
6396.77	10.98	0.321	-0.081	2	0.1	0.213	5.59206	3.59206	0.00100677	0.00115228	0.00331134	0.305	8.45462
6397.75	11.02	0.323	-0.081	2	0.1	0.213	5.61243	3.61243	0.00102559	0.00115228	0.00333016	0.305	8.45462
6398.84	11.1	0.325	-0.081	2	0.1	0.213	5.65317	3.65317	0.00104441	0.00115228	0.00334897	0.305	8.45462
6399.83	11.12	0.325	-0.081	2	0.1	0.213	5.66336	3.66336	0.00104441	0.00115228	0.00334897	0.305	8.45462
6400.81	11.18	0.326	-0.082	2	0.1	0.213	5.69391	3.69391	0.00105382	0.00114592	0.00334565	0.305	8.45462
6401.8	11.22	0.326	-0.082	2	0.1	0.213	5.71429	3.71429	0.00105382	0.00114592	0.00334565	0.305	8.45462
6402.78	11.28	0.328	-0.082	2	0.1	0.213	5.74484	3.74484	0.00107264	0.00114592	0.00336447	0.3	8.31602
6403.77	11.32	0.328	-0.082	2	0.1	0.213	5.76522	3.76522	0.00107264	0.00114592	0.00336447	0.3	8.31602
6404.75	11.38	0.33	-0.082	2	0.1	0.213	5.79577	3.79577	0.00109146	0.00114592	0.00338329	0.3	8.31602
6405.85	11.42	0.331	-0.082	2	0.1	0.213	5.81614	3.81614	0.00110087	0.00114592	0.0033927	0.3	8.31602
6406.83	11.48	0.333	-0.082	2	0.1	0.213	5.8467	3.8467	0.00111968	0.00114592	0.00341152	0.3	8.31602
6407.81	11.52	0.333	-0.083	2	0.1	0.213	5.86707	3.86707	0.00111968	0.00113955	0.00339878	0.3	8.31602
6408.8	11.58	0.335	-0.083	2	0.1	0.213	5.89763	3.89763	0.0011385	0.00113955	0.0034176	0.3	8.31602
6409.79	11.58	0.335	-0.083	2	0.1	0.213	5.89763	3.89763	0.0011385	0.00113955	0.0034176	0.3	8.31602
6410.77	11.6	0.335	-0.083	2	0.1	0.213	5.90782	3.90782	0.0011385	0.00113955	0.0034176	0.3	8.31602
6411.76	11.6	0.335	-0.083	2	0.1	0.213	5.90782	3.90782	0.0011385	0.00113955	0.0034176	0.295	8.17742
6412.84	11.62	0.336	-0.083	2	0.1	0.213	5.918	3.918	0.00114791	0.00113955	0.00342701	0.295	8.17742
6413.83	11.6	0.336	-0.083	2	0.1	0.213	5.90782	3.90782	0.00114791	0.00113955	0.00342701	0.295	8.17742
6414.81	11.62	0.336	-0.083	2	0.1	0.213	5.918	3.918	0.00114791	0.00113955	0.00342701	0.295	8.17742
6415.8	11.62	0.336	-0.083	2	0.1	0.213	5.918	3.918	0.00114791	0.00113955	0.00342701	0.295	8.17742
6416.78	11.64	0.336	-0.084	2	0.1	0.213	5.92819	3.92819	0.00114791	0.00113318	0.00341428	0.295	8.17742
6417.77	11.62	0.336	-0.084	2	0.1	0.213	5.918	3.918	0.00114791	0.00113318	0.00341428	0.295	8.17742
6418.75	11.66	0.336	-0.084	2	0.1	0.213	5.93838	3.93838	0.00114791	0.00113318	0.00341428	0.295	8.17742
6419.85	11.64	0.336	-0.084	2	0.1	0.213	5.92819	3.92819	0.00114791	0.00113318	0.00341428	0.295	8.17742
6420.83	11.66	0.336	-0.084	2	0.1	0.213	5.93838	3.93838	0.00114791	0.00113318	0.00341428	0.295	8.17742
6421.81	11.66	0.338	-0.084	2	0.1	0.213	5.93838	3.93838	0.00116673	0.00113318	0.0034331	0.295	8.17742
6422.8	11.68	0.336	-0.084	2	0.1	0.213	5.94856	3.94856	0.00114791	0.00113318	0.00341428	0.295	8.17742
6423.79	11.66	0.336	-0.084	2	0.1	0.213	5.93838	3.93838	0.00114791	0.00113318	0.00341428	0.295	8.17742
6424.77	11.68	0.338	-0.084	2	0.1	0.213	5.94856	3.94856	0.00116673	0.00113318	0.0034331	0.295	8.17742
6425.75	11.68	0.338	-0.084	2	0.1	0.213	5.94856	3.94856	0.00116673	0.00113318	0.0034331	0.295	8.17742
6426.84	11.68	0.338	-0.084	2	0.1	0.213	5.94856	3.94856	0.00116673	0.00113318	0.0034331	0.295	8.17742
6427.83	11.68	0.338	-0.084	2	0.1	0.213	5.94856	3.94856	0.00116673	0.00113318	0.0034331	0.29	8.03882
6428.81	11.68	0.338	-0.084	2	0.1	0.213	5.94856	3.94856	0.00116673	0.00113318	0.0034331	0.29	8.03882
6429.8	11.68	0.338	-0.084	2	0.1	0.213	5.94856	3.94856	0.00116673	0.00113318	0.0034331	0.29	8.03882
6430.79	11.7	0.338	-0.084	2	0.1	0.213	5.95875	3.95875	0.00116673	0.00113318	0.0034331	0.295	8.17742
6431.77	11.68	0.338	-0.084	2	0.1	0.213	5.94856	3.94856	0.00116673	0.00113318	0.0034331	0.29	8.03882
6432.75	11.7	0.338	-0.084	2	0.1	0.213	5.95875	3.95875	0.00116673	0.00113318	0.0034331	0.29	8.03882
6433.85	11.7	0.338	-0.084	2	0.1	0.213	5.95875	3.95875	0.00116673	0.00113318	0.0034331	0.29	8.03882
6434.83	11.72	0.338	-0.084	2	0.1	0.213	5.96893	3.96893	0.00116673	0.00113318	0.0034331	0.29	8.03882
6435.81	11.7	0.338	-0.084	2	0.1	0.213	5.95875	3.95875	0.00116673	0.00113318	0.0034331	0.29	8.03882
6436.8	11.72	0.34	-0.084	2	0.1	0.213	5.96893	3.96893	0.00118555	0.00113318	0.00345191	0.29	8.03882
6437.78	11.72	0.34	-0.084	2	0.1	0.213	5.96893	3.96893	0.00118555	0.00113318	0.00345191	0.29	8.03882
6438.77	11.72	0.34	-0.084	2	0.1	0.213	5.96893	3.96893	0.00118555	0.00113318	0.00345191	0.29	8.03882
6439.75	11.72	0.34	-0.084	2	0.1	0.213	5.96893	3.96893	0.00118555	0.00113318	0.00345191	0.29	8.03882
6440.85	11.74	0.34	-0.084	2	0.1	0.213	5.97912	3.97912	0.00118555	0.00113318	0.00345191	0.29	8.03882
6441.83	11.72	0.338	-0.084	2	0.1	0.213	5.96893	3.96893	0.00116673	0.00113318	0.0034331	0.29	8.03882
6442.81	11.72	0.34	-0.084	2	0.1	0.213	5.96893	3.96893	0.00118555	0.00113318	0.00345191	0.29	8.03882
6443.8	11.74	0.34	-0.084	2	0.1	0.213	5.97912	3.97912	0.00118555	0.00113318	0.00345191	0.29	8.03882
6444.78	11.74	0.34	-0.084	2	0.1	0.213	5.97912	3.97912	0.00118555	0.00113318	0.00345191	0.29	8.03882
6445.77	11.74	0.34	-0.084	2	0.1	0.213	5.97912	3.97912	0.00118555	0.00113318	0.00345191	0.29	8.03882
6446.75	11.74	0.34	-0.084	2	0.1	0.213	5.97912	3.97912	0.00118555	0.00113318	0.00345191	0.29	8.03882
6447.85	11.74	0.34	-0.084	2	0.1	0.213	5.97912	3.97912	0.00118555	0.00113318	0.00345191	0.29	8.03882
6448.83	11.76	0.34	-0.084	2	0.1	0.213	5.9893	3.9893	0.00118555	0.00113318	0.00345191	0.29	8.03882
6449.81	11.76	0.34	-0.084	2	0.1	0.213	5.9893	3.9893	0.00118555	0.00113318	0.00345191	0.29	8.03882
6450.8	11.76	0.34	-0.084	2	0.1	0.213	5.9893	3.9893	0.00118555	0.00113318	0.00345191	0.29	8.03882
6451.78	11.74	0.34	-0.084	2	0.1	0.213	5.97912	3.97912	0.00118555	0.00113318	0.00345191	0.29	8.03882
6452.77	11.76	0.34	-0.084	2	0.1	0.213	5.9893	3.9893	0.00118555	0.00113318	0.00345191	0.29	8.03882
6453.76	11.76	0.34	-0.084	2	0.1	0.213	5.9893	3.9893	0.00118555	0.00113318	0.00345191	0.29	8.03882
6454.85	11.76	0.34	-0.084	2	0.1	0.213	5.9893	3.9893	0.00118555	0.00113318	0.00345191	0.29	8.03882
6455.83	11.76	0.34	-0.084	2	0.1	0.213	5.9893	3.9893	0.00118555	0.00113318	0.00345191	0.29	8.03882
6456.81	11.76	0.341	-0.084	2	0.1	0.213	5.9893	3.9893	0.00119496	0.00113318	0.00346132	0.29	8.03882
6457.8	11.76	0.341	-0.084	2	0.1	0.213	5.9893	3.9893	0.00119496	0.00113318	0.00346132	0.29	8.03882
6458.79	11.78	0.341	-0.084	2	0.1	0.213	5.99949	3.99949	0.00119496	0.00113318	0.00346132	0.29	8.03882
6459.77	11.76	0.34	-0.084	2	0.1	0.213	5.9893	3.9893	0.00118555	0.00113318	0.00345191	0.29	8.03882
6460.75	11.78	0.34	-0.084	2	0.1	0.213	5.99949	3.99949	0.00118555	0.00113318	0.00345191	0.29	8.03882
6461.84	11.78	0.34	-0.084	2	0.1	0.213	5.99949	3.99949	0.00118555	0.00113318	0.00345191	0.29	8.03882
6462.83	11.78	0.341	-0.084	2	0.1	0.213	5.99949	3.99949	0.00119496	0.00113318	0.00346132	0.29	8.03882
6463.81	11.78	0.34	-0.084	2	0.1	0.213	5.99949	3.99949	0.00118555	0.00113318	0.00345191	0.29	8.03882
6464.8	11.78	0.34	-0.084	2	0.1	0.213	5.99949	3.99949	0.00118555	0.00113318	0.00345191	0.29	8.03882
6465.78	11.78	0.34	-0.084	2	0.1	0.213	5.99949	3.99949	0.00118555	0.00113318	0.00345191	0.29	8.03882
6466.77	11.78	0.341	-0.084	2	0.1	0.213	5.99949	3.99949	0.00119496	0.00113318	0.00346132	0.29	8.03882
6467.75	11.78	0.341	-0.084	2	0.1	0.213	5.99949	3.99949	0.00119496	0.00113318	0.00346132	0.29	8.03882
6468.85	11.78	0.34	-0.084	2	0.1	0.213	5.99949	3.99949	0.00118555	0.00113318	0.00345191	0.29	8.03882
6469.83	11.78	0.34	-0.084	2	0.1	0.213	5.99949	3.99949	0.00118555	0.00113318	0.00345191	0.29	8.03882
6470.81	11.78	0.341	-0.084	2	0.1	0.213	5.99949	3.99949	0.00119496	0.00113318	0.00346132	0.29	8.03882
6471.8	11.78	0.34	-0.084	2	0.1	0.213	5.99949	3.99949	0.00118555	0.00113318	0.00345191	0.29	8.03882
6472.78	11.78	0.34	-0.084	2	0.1	0.213	5.99949	3.99949	0.00118555	0.00113318	0.00345191	0.29	8.03882
6473.77	11.78	0.341	-0.084	2	0.1	0.213	5.99949	3.99949	0.00119496	0.00113318	0.00346132	0.29	8.03882
6474.75	11.78	0.341	-0.084	2	0.1	0.213	5.99949	3.99949	0.00119496	0.00113318	0.00346132	0.29	8.03882
6475.84	11.78	0.341	-0.084	2	0.1	0.213	5.99949	3.99949	0.00119496	0.00113318	0.00346132	0.29	8.03882
6476.83	11.78	0.341	-0.084	2	0.1	0.213	5.99949	3.99949	0.00119496	0.00113318	0.00346132	0.29	8.03882
6477.81	11.78	0.34	-0.084	2	0.1	0.213	5.99949	3.99949	0.00118555	0.00113318	0.00345191	0.29	8.03882
6478.8	11.78	0.341	-0.084	2	0.1	0.213	5.99949	3.99949	0.00119496	0.00113318	0.00346132	0.29	8.03882
6479.79	11.78	0.341	-0.084	2	0.1	0.213	5.99949	3.99949	0.00119496	0.00113318	0.00346132	0.29	8.03882
6480.77	11.78	0.341	-0.084	2	0.1	0.213	5.99949	3.99949	0.00119496	0.00113318	0.00346132	0.29	8.03882
6481.76	11.78	0.341	-0.084	2	0.1	0.213	5.99949	3.99949	0.00119496	0.00113318	0.00346132	0.29	8.03882
6482.84	11.78	0.34	-0.084	2	0.1	0.213	5.99949	3.99949	0.00118555	0.00113318	0.00345191	0.29	8.03882
6483.83	11.78	0.341	-0.084	2	0.1	0.213	5.99949	3.99949	0.00119496	0.00113318	0.00346132	0.29	8.03882
6484.81	11.78	0.341	-0.084	2	0.1	0.213	5.99949	3.99949	0.00119496	0.00113318	0.00346132	0.29	8.03882
6485.8	11.78	0.341	-0.084	2	0.1	0.213	5.99949	3.99949	0.00119496	0.00113318	0.00346132	0.29	8.03882
6486.79	11.78	0.341	-0.084	2	0.1	0.213	5.99949	3.99949	0.00119496	0.00113318	0.00346132	0.29	8.03882
6487.77	11.78	0.341	-0.084	2	0.1	0.213	5.99949	3.99949	0.00119496	0.00113318	0.00346132	0.29	8.03882
6488.75	11.8	0.341	-0.084	2	0.1	0.213	6.00968	4.00968	0.00119496	0.00113318	0.00346132	0.29	8.03882
6489.84	11.8	0.341	-0.084	2	0.1	0.213	6.00968	4.00968	0.00119496	0.00113318	0.00346132	0.29	8.03882
6490.83	11.8	0.341	-0.084	2	0.1	0.213	6.00968	4.00968	0.00119496	0.00113318	0.00346132	0.29	8.03882
6491.81	11.8	0.341	-0.084	2	0.1	0.213	6.00968	4.00968	0.00119496	0.00113318	0.00346132	0.29	8.03882
6492.8	11.8	0.341	-0.084	2	0.1	0.213	6.00968	4.00968	0.00119496	0.00113318	0.00346132	0.29	8.03882
6493.78	11.8	0.341	-0.084	2	0.1	0.213	6.00968	4.00968	0.00119496	0.00113318	0.00346132	0.29	8.03882
6494.77	11.8	0.341	-0.084	2	0.1	0.213	6.00968	4.00968	0.00119496	0.00113318	0.00346132	0.29	8.03882
6495.75	11.78	0.341	-0.084	2	0.1	0.213	5.99949	3.99949	0.00119496	0.00113318	0.00346132	0.29	8.03882
6496.85	11.78	0.341	-0.084	2	0.1	0.213	5.99949	3.99949	0.00119496	0.00113318	0.00346132	0.29	8.03882
6497.83	11.78	0.341	-0.084	2	0.1	0.213	5.99949	3.99949	0.00119496	0.00113318	0.00346132	0.29	8.03882
6498.81	11.78	0.341	-0.084	2	0.1	0.213	5.99949	3.99949	0.00119496	0.00113318	0.00346132	0.29	8.03882
6499.8	11.78	0.341	-0.084	2	0.1	0.213	5.99949	3.99949	0.00119496	0.00113318	0.00346132	0.29	8.03882
6500.78	11.78	0.341	-0.084	2	0.1	0.213	5.99949	3.99949	0.00119496	0.00113318	0.00346132	0.29	8.03882
6501.77	11.78	0.341	-0.084	2	0.1	0.213	5.99949	3.99949	0.00119496	0.00113318	0.00346132	0.29	8.03882
6502.76	11.78	0.341	-0.084	2	0.1	0.213	5.99949	3.99949	0.00119496	0.00113318	0.00346132	0.29	8.03882
6503.84	11.78	0.341	-0.084	2	0.1	0.213	5.99949	3.99949	0.00119496	0.00113318	0.00346132	0.285	7.90022
6504.83	11.78	0.341	-0.084	2	0.1	0.213	5.99949	3.99949	0.00119496	0.00113318	0.00346132	0.29	8.03882
6505.81	11.78	0.341	-0.084	2	0.1	0.213	5.99949	3.99949	0.00119496	0.00113318	0.00346132	0.29	8.03882
6506.8	11.78	0.341	-0.084	2	0.1	0.213	5.99949	3.99949	0.00119496	0.00113318	0.00346132	0.285	7.90022
6507.79	11.78	0.341	-0.084	2	0.1	0.213	5.99949	3.99949	0.00119496	0.00113318	0.00346132	0.29	8.03882
6508.77	11.78	0.341	-0.084	2	0.1	0.213	5.99949	3.99949	0.00119496	0.00113318	0.00346132	0.285	7.90022
6509.75	11.78	0.341	-0.084	2	0.1	0.213	5.99949	3.99949	0.00119496	0.00113318	0.00346132	0.29	8.03882
6510.84	11.78	0.341	-0.084	2	0.1	0.213	5.99949	3.99949	0.00119496	0.00113318	0.00346132	0.285	7.90022
6511.83	11.78	0.341	-0.084	2	0.1	0.213	5.99949	3.99949	0.00119496	0.00113318	0.00346132	0.29	8.03882
6512.81	11.78	0.341	-0.084	2	0.1	0.213	5.99949	3.99949	0.00119496	0.00113318	0.00346132	0.29	8.03882
6513.8	11.78	0.341	-0.084	2	0.1	0.213	5.99949	3.99949	0.00119496	0.00113318	0.00346132	0.285	7.90022
6514.78	11.78	0.341	-0.084	2	0.1	0.213	5.99949	3.99949	0.00119496	0.00113318	0.00346132	0.29	8.03882
6515.77	11.76	0.341	-0.084	2	0.1	0.213	5.9893	3.9893	0.00119496	0.00113318	0.00346132	0.285	7.90022
6516.76	11.78	0.341	-0.084	2	0.1	0.213	5.99949	3.99949	0.00119496	0.00113318	0.00346132	0.285	7.90022
6517.85	11.76	0.341	-0.084	2	0.1	0.213	5.9893	3.9893	0.00119496	0.00113318	0.00346132	0.29	8.03882
6518.83	11.76	0.341	-0.084	2	0.1	0.213	5.9893	3.9893	0.00119496	0.00113318	0.00346132	0.29	8.03882
6519.81	11.76	0.343	-0.084	2	0.1	0.213	5.9893	3.9893	0.00121377	0.00113318	0.00348014	0.285	7.90022
6520.8	11.76	0.341	-0.084	2	0.1	0.213	5.9893	3.9893	0.00119496	0.00113318	0.00346132	0.29	8.03882
6521.78	11.76	0.341	-0.084	2	0.1	0.213	5.9893	3.9893	0.00119496	0.00113318	0.00346132	0.285	7.90022
6522.77	11.76	0.341	-0.084	2	0.1	0.213	5.9893	3.9893	0.00119496	0.00113318	0.00346132	0.285	7.90022
6523.75	11.76	0.341	-0.084	2	0.1	0.213	5.9893	3.9893	0.00119496	0.00113318	0.00346132	0.285	7.90022
6524.84	11.78	0.341	-0.084	2	0.1	0.213	5.99949	3.99949	0.00119496	0.00113318	0.00346132	0.285	7.90022
6525.83	11.78	0.341	-0.084	2	0.1	0.213	5.99949	3.99949	0.00119496	0.00113318	0.00346132	0.285	7.90022
6526.81	11.78	0.341	-0.084	2	0.1	0.213	5.99949	3.99949	0.00119496	0.00113318	0.00346132	0.29	8.03882
6527.8	11.78	0.341	-0.084	2	0.1	0.213	5.99949	3.99949	0.00119496	0.00113318	0.00346132	0.285	7.90022
6528.79	11.78	0.341	-0.084	2	0.1	0.213	5.99949	3.99949	0.00119496	0.00113318	0.00346132	0.285	7.90022
6529.77	11.78	0.341	-0.084	2	0.1	0.213	5.99949	3.99949	0.00119496	0.00113318	0.00346132	0.29	8.03882
6530.75	11.78	0.341	-0.084	2	0.1	0.213	5.99949	3.99949	0.00119496	0.00113318	0.00346132	0.285	7.90022
6531.85	11.78	0.341	-0.084	2	0.1	0.213	5.99949	3.99949	0.00119496	0.00113318	0.00346132	0.285	7.90022
6532.83	11.78	0.343	-0.084	2	0.1	0.213	5.99949	3.99949	0.00121377	0.00113318	0.00348014	0.285	7.90022
6533.81	11.78	0.343	-0.084	2	0.1	0.213	5.99949	3.99949	0.00121377	0.00113318	0.00348014	0.285	7.90022
6534.8	11.78	0.343	-0.084	2	0.1	0.213	5.99949	3.99949	0.00121377	0.00113318	0.00348014	0.285	7.90022
6535.78	11.78	0.341	-0.084	2	0.1	0.213	5.99949	3.99949	0.00119496	0.00113318	0.00346132	0.285	7.90022
6536.77	11.78	0.341	-0.084	2	0.1	0.213	5.99949	3.99949	0.00119496	0.00113318	0.00346132	0.285	7.90022
6537.75	11.78	0.341	-0.084	2	0.1	0.213	5.99949	3.99949	0.00119496	0.00113318	0.00346132	0.285	7.90022
6538.84	11.78	0.341	-0.084	2	0.1	0.213	5.99949	3.99949	0.00119496	0.00113318	0.00346132	0.285	7.90022
6539.83	11.78	0.341	-0.084	2	0.1	0.213	5.99949	3.99949	0.00119496	0.00113318	0.00346132	0.285	7.90022
6540.81	11.78	0.341	-0.084	2	0.1	0.213	5.99949	3.99949	0.00119496	0.00113318	0.00346132	0.285	7.90022
6541.8	11.78	0.341	-0.084	2	0.1	0.213	5.99949	3.99949	0.00119496	0.00113318	0.00346132	0.285	7.90022
6542.78	11.78	0.341	-0.084	2	0.1	0.213	5.99949	3.99949	0.00119496	0.00113318	0.00346132	0.285	7.90022
6543.77	11.78	0.343	-0.084	2	0.1	0.213	5.99949	3.99949	0.00121377	0.00113318	0.00348014	0.285	7.90022
6544.75	11.78	0.341	-0.084	2	0.1	0.213	5.99949	3.99949	0.00119496	0.00113318	0.00346132	0.285	7.90022
6545.85	11.78	0.341	-0.084	2	0.1	0.213	5.99949	3.99949	0.00119496	0.00113318	0.00346132	0.285	7.90022
6546.83	11.8	0.343	-0.084	2	0.1	0.213	6.00968	4.00968	0.00121377	0.00113318	0.00348014	0.285	7.90022
6547.81	11.78	0.343	-0.084	2	0.1	0.213	5.99949	3.99949	0.00121377	0.00113318	0.00348014	0.285	7.90022
6548.8	11.78	0.343	-0.084	2	0.1	0.213	5.99949	3.99949	0.00121377	0.00113318	0.00348014	0.285	7.90022
6549.79	11.78	0.341	-0.084	2	0.1	0.213	5.99949	3.99949	0.00119496	0.00113318	0.00346132	0.285	7.90022
6550.77	11.78	0.343	-0.084	2	0.1	0.213	5.99949	3.99949	0.00121377	0.00113318	0.00348014	0.285	7.90022
6551.75	11.78	0.343	-0.084	2	0.1	0.213	5.99949	3.99949	0.00121377	0.00113318	0.00348014	0.285	7.90022
6552.84	11.78	0.343	-0.084	2	0.1	0.213	5.99949	3.99949	0.00121377	0.00113318	0.00348014	0.285	7.90022
6553.83	11.78	0.343	-0.084	2	0.1	0.213	5.99949	3.99949	0.00121377	0.00113318	0.00348014	0.285	7.90022
6554.81	11.78	0.343	-0.084	2	0.1	0.213	5.99949	3.99949	0.00121377	0.00113318	0.00348014	0.285	7.90022
6555.8	11.78	0.343	-0.084	2	0.1	0.213	5.99949	3.99949	0.00121377	0.00113318	0.00348014	0.285	7.90022
6556.78	11.8	0.343	-0.084	2	0.1	0.213	6.00968	4.00968	0.00121377	0.00113318	0.00348014	0.285	7.90022
6557.77	11.78	0.343	-0.084	2	0.1	0.213	5.99949	3.99949	0.00121377	0.00113318	0.00348014	0.285	7.90022
6558.75	11.8	0.343	-0.084	2	0.1	0.213	6.00968	4.00968	0.00121377	0.00113318	0.00348014	0.285	7.90022
6559.85	11.78	0.343	-0.084	2	0.1	0.213	5.99949	3.99949	0.00121377	0.00113318	0.00348014	0.285	7.90022
6560.83	11.78	0.343	-0.084	2	0.1	0.213	5.99949	3.99949	0.00121377	0.00113318	0.00348014	0.285	7.90022
6561.81	11.78	0.341	-0.084	2	0.1	0.213	5.99949	3.99949	0.00119496	0.00113318	0.00346132	0.285	7.90022
6562.8	11.8	0.343	-0.084	2	0.1	0.213	6.00968	4.00968	0.00121377	0.00113318	0.00348014	0.285	7.90022
6563.79	11.8	0.343	-0.084	2	0.1	0.213	6.00968	4.00968	0.00121377	0.00113318	0.00348014	0.285	7.90022
6564.77	11.78	0.343	-0.084	2	0.1	0.213	5.99949	3.99949	0.00121377	0.00113318	0.00348014	0.285	7.90022
6565.76	11.78	0.343	-0.084	2	0.1	0.213	5.99949	3.99949	0.00121377	0.00113318	0.00348014	0.285	7.90022
6566.85	11.78	0.341	-0.084	2	0.1	0.213	5.99949	3.99949	0.00119496	0.00113318	0.00346132	0.285	7.90022
6567.83	11.78	0.343	-0.084	2	0.1	0.213	5.99949	3.99949	0.00121377	0.00113318	0.00348014	0.285	7.90022
6568.81	11.78	0.343	-0.084	2	0.1	0.213	5.99949	3.99949	0.00121377	0.00113318	0.00348014	0.285	7.90022
6569.8	11.78	0.343	-0.084	2	0.1	0.213	5.99949	3.99949	0.00121377	0.00113318	0.00348014	0.285	7.90022
6570.79	11.78	0.343	-0.084	2	0.1	0.213	5.99949	3.99949	0.00121377	0.00113318	0.00348014	0.285	7.90022
6571.77	11.78	0.343	-0.084	2	0.1	0.213	5.99949	3.99949	0.00121377	0.00113318	0.00348014	0.285	7.90022
6572.76	11.78	0.343	-0.084	2	0.1	0.213	5.99949	3.99949	0.00121377	0.00113318	0.00348014	0.285	7.90022
6573.84	11.78	0.341	-0.084	2	0.1	0.213	5.99949	3.99949	0.00119496	0.00113318	0.00346132	0.285	7.90022
6574.83	11.78	0.341	-0.083	2.02	0.1	0.213	5.99949	3.97949	0.00119496	0.00113955	0.00347406	0.285	7.90022
6575.81	11.78	0.343	-0.083	2.06	0.1	0.213	5.99949	3.93949	0.00121377	0.00113955	0.00349287	0.285	7.90022
6576.8	11.78	0.343	-0.083	2.07	0.1	0.213	5.99949	3.92949	0.00121377	0.00113955	0.00349287	0.285	7.90022
6577.78	11.78	0.343	-0.082	2.11	0.1	0.213	5.99949	3.88949	0.00121377	0.00114592	0.00350561	0.285	7.90022
6578.77	11.78	0.343	-0.082	2.165	0.1	0.213	5.99949	3.83449	0.00121377	0.00114592	0.00350561	0.285	7.90022
6579.75	11.78	0.343	-0.081	2.235	0.1	0.213	5.99949	3.76449	0.00121377	0.00115228	0.00351834	0.285	7.90022
6580.85	11.78	0.343	-0.08	2.3	0.1	0.213	5.99949	3.69949	0.00121377	0.00115865	0.00353107	0.285	7.90022
6581.83	11.78	0.343	-0.078	2.365	0.1	0.213	5.99949	3.63449	0.00121377	0.00117138	0.00355654	0.285	7.90022
6582.81	11.78	0.343	-0.077	2.415	0.1	0.213	5.99949	3.58449	0.00121377	0.00117775	0.00356927	0.285	7.90022
6583.8	11.78	0.343	-0.076	2.465	0.1	0.213	5.99949	3.53449	0.00121377	0.00118411	0.003582	0.285	7.90022
6584.79	11.78	0.343	-0.075	2.52	0.1	0.213	5.99949	3.47949	0.00121377	0.00119048	0.00359473	0.285	7.90022
6585.77	11.78	0.343	-0.074	2.58	0.1	0.213	5.99949	3.41949	0.00121377	0.00119685	0.00360747	0.28	7.76162
6586.75	11.78	0.343	-0.073	2.625	0.1	0.213	5.99949	3.37449	0.00121377	0.00120321	0.0036202	0.28	7.76162
6587.85	11.78	0.343	-0.072	2.675	0.1	0.213	5.99949	3.32449	0.00121377	0.00120958	0.00363293	0.28	7.76162
6588.83	11.78	0.343	-0.071	2.715	0.1	0.213	5.99949	3.28449	0.00121377	0.00121594	0.00364566	0.28	7.76162
6589.81	11.78	0.343	-0.071	2.765	0.1	0.213	5.99949	3.23449	0.00121377	0.00121594	0.00364566	0.28	7.76162
6590.8	11.78	0.343	-0.07	2.81	0.1	0.213	5.99949	3.18949	0.00121377	0.00122231	0.00365839	0.28	7.76162
6591.78	11.78	0.343	-0.069	2.86	0.1	0.213	5.99949	3.13949	0.00121377	0.00122868	0.00367113	0.28	7.76162
6592.77	11.78	0.343	-0.068	2.91	0.1	0.213	5.99949	3.08949	0.00121377	0.00123504	0.00368386	0.275	7.62302
6593.76	11.78	0.343	-0.067	2.96	0.1	0.213	5.99949	3.03949	0.00121377	0.00124141	0.00369659	0.275	7.62302
6594.85	11.78	0.343	-0.067	3.005	0.1	0.213	5.99949	2.99449	0.00121377	0.00124141	0.00369659	0.275	7.62302
6595.83	11.78	0.343	-0.066	3.05	0.1	0.213	5.99949	2.94949	0.00121377	0.00124777	0.00370932	0.275	7.62302
6596.81	11.78	0.343	-0.065	3.11	0.1	0.213	5.99949	2.88949	0.00121377	0.00125414	0.00372206	0.275	7.62302
6597.8	11.78	0.343	-0.064	3.155	0.1	0.213	5.99949	2.84449	0.00121377	0.00126051	0.00373479	0.275	7.62302
6598.78	11.78	0.343	-0.063	3.21	0.1	0.213	5.99949	2.78949	0.00121377	0.00126687	0.00374752	0.275	7.62302
6599.77	11.78	0.343	-0.062	3.255	0.1	0.213	5.99949	2.74449	0.00121377	0.00127324	0.00376025	0.275	7.62302
6600.75	11.78	0.343	-0.061	3.31	0.1	0.213	5.99949	2.68949	0.00121377	0.00127961	0.00377299	0.27	7.48442
6601.84	11.78	0.343	-0.059	3.36	0.1	0.213	5.99949	2.63949	0.00121377	0.00129234	0.00379845	0.27	7.48442
6602.83	11.78	0.343	-0.058	3.41	0.1	0.213	5.99949	2.58949	0.00121377	0.0012987	0.00381118	0.27	7.48442
6603.81	11.78	0.343	-0.058	3.455	0.1	0.213	5.99949	2.54449	0.00121377	0.0012987	0.00381118	0.27	7.48442
6604.8	11.78	0.345	-0.056	3.51	0.1	0.213	5.99949	2.48949	0.00123259	0.00131144	0.00385547	0.27	7.48442
6605.78	11.78	0.345	-0.055	3.56	0.1	0.213	5.99949	2.43949	0.00123259	0.0013178	0.0038682	0.27	7.48442
6606.77	11.78	0.343	-0.054	3.61	0.1	0.213	5.99949	2.38949	0.00121377	0.00132417	0.00386211	0.27	7.48442
6607.76	11.78	0.343	-0.053	3.655	0.1	0.213	5.99949	2.34449	0.00121377	0.00133054	0.00387485	0.27	7.48442
6608.85	11.78	0.345	-0.052	3.71	0.1	0.213	5.99949	2.28949	0.00123259	0.0013369	0.0039064	0.27	7.48442
6609.83	11.78	0.345	-0.051	3.76	0.1	0.213	5.99949	2.23949	0.00123259	0.00134327	0.00391913	0.265	7.34582
6610.81	11.78	0.343	-0.05	3.805	0.1	0.213	5.99949	2.19449	0.00121377	0.00134963	0.00391304	0.265	7.34582
6611.8	11.78	0.343	-0.049	3.86	0.1	0.213	5.99949	2.13949	0.00121377	0.001356	0.00392578	0.265	7.34582
6612.78	11.78	0.343	-0.048	3.905	0.1	0.213	5.99949	2.09449	0.00121377	0.00136237	0.00393851	0.265	7.34582
6613.77	11.78	0.345	-0.047	3.955	0.1	0.213	5.99949	2.04449	0.00123259	0.00136873	0.00397006	0.265	7.34582
6614.75	11.78	0.345	-0.046	4.005	0.1	0.213	5.99949	1.99449	0.00123259	0.0013751	0.00398279	0.265	7.34582
6615.84	11.78	0.345	-0.045	4.065	0.1	0.213	5.99949	1.93449	0.00123259	0.00138146	0.00399552	0.265	7.34582
6616.83	11.78	0.343	-0.044	4.11	0.1	0.213	5.99949	1.88949	0.00121377	0.00138783	0.00398944	0.265	7.34582
6617.81	11.78	0.345	-0.043	4.16	0.1	0.213	5.99949	1.83949	0.00123259	0.0013942	0.00402099	0.265	7.34582
6618.8	11.78	0.343	-0.042	4.2	0.1	0.213	5.99949	1.79949	0.00121377	0.00140056	0.0040149	0.26	7.20722
6619.78	11.78	0.345	-0.041	4.26	0.1	0.213	5.99949	1.73949	0.00123259	0.00140693	0.00404645	0.26	7.20722
6620.77	11.78	0.343	-0.04	4.31	0.1	0.213	5.99949	1.68949	0.00121377	0.0014133	0.00404037	0.26	7.20722
6621.76	11.76	0.345	-0.039	4.355	0.1	0.213	5.9893	1.6343	0.00123259	0.00141966	0.00407192	0.26	7.20722
6622.84	11.76	0.345	-0.037	4.41	0.1	0.213	5.9893	1.5793	0.00123259	0.00143239	0.00409738	0.26	7.20722
6623.83	11.76	0.343	-0.036	4.465	0.1	0.213	5.9893	1.5243	0.00121377	0.00143876	0.0040913	0.26	7.20722
6624.81	11.76	0.345	-0.035	4.51	0.1	0.213	5.9893	1.4793	0.00123259	0.00144513	0.00412285	0.26	7.20722
6625.8	11.76	0.345	-0.034	4.565	0.1	0.213	5.9893	1.4243	0.00123259	0.00145149	0.00413558	0.26	7.20722
6626.78	11.76	0.345	-0.033	4.61	0.1	0.213	5.9893	1.3793	0.00123259	0.00145786	0.00414831	0.255	7.06862
6627.77	11.78	0.345	-0.032	4.665	0.1	0.213	5.99949	1.33449	0.00123259	0.00146423	0.00416104	0.255	7.06862
6628.75	11.76	0.343	-0.031	4.71	0.1	0.213	5.9893	1.2793	0.00121377	0.00147059	0.00415496	0.255	7.06862
6629.85	11.78	0.345	-0.03	4.76	0.1	0.213	5.99949	1.23949	0.00123259	0.00147696	0.00418651	0.255	7.06862
6630.83	11.78	0.345	-0.029	4.81	0.1	0.213	5.99949	1.18949	0.00123259	0.00148332	0.00419924	0.255	7.06862
6631.81	11.78	0.345	-0.028	4.86	0.1	0.213	5.99949	1.13949	0.00123259	0.00148969	0.00421197	0.255	7.06862
6632.8	11.78	0.345	-0.027	4.91	0.1	0.213	5.99949	1.08949	0.00123259	0.00149606	0.00422471	0.255	7.06862
6633.78	11.78	0.345	-0.026	4.96	0.1	0.213	5.99949	1.03949	0.00123259	0.00150242	0.00423744	0.255	7.06862
6634.77	11.78	0.345	-0.025	5	0.1	0.213	5.99949	0.999491	0.00123259	0.00150879	0.00425017	0.255	7.06862
6635.75	11.78	0.345	-0.024	5.055	0.1	0.213	5.99949	0.944491	0.00123259	0.00151516	0.0042629	0.255	7.06862
6636.85	11.8	0.345	-0.023	5.11	0.1	0.213	6.00968	0.899677	0.00123259	0.00152152	0.00427564	0.255	7.06862
6637.83	11.78	0.345	-0.022	5.165	0.1	0.213	5.99949	0.834491	0.00123259	0.00152789	0.00428837	0.25	6.93002
6638.81	11.78	0.345	-0.021	5.205	0.1	0.213	5.99949	0.794491	0.00123259	0.00153425	0.0043011	0.25	6.93002
6639.8	11.78	0.345	-0.02	5.26	0.1	0.213	5.99949	0.739491	0.00123259	0.00154062	0.00431383	0.25	6.93002
6640.79	11.78	0.345	-0.019	5.31	0.1	0.213	5.99949	0.689491	0.00123259	0.00154699	0.00432657	0.25	6.93002
6641.77	11.78	0.345	-0.018	5.355	0.1	0.213	5.99949	0.644491	0.00123259	0.00155335	0.0043393	0.25	6.93002
6642.75	11.78	0.345	-0.017	5.41	0.1	0.213	5.99949	0.589491	0.00123259	0.00155972	0.00435203	0.25	6.93002
6643.84	11.78	0.345	-0.016	5.46	0.1	0.213	5.99949	0.539491	0.00123259	0.00156608	0.00436476	0.25	6.93002
6644.83	11.78	0.345	-0.014	5.51	0.1	0.213	5.99949	0.489491	0.00123259	0.00157882	0.00439023	0.25	6.93002
6645.81	11.78	0.345	-0.014	5.555	0.1	0.213	5.99949	0.444491	0.00123259	0.00157882	0.00439023	0.25	6.93002
6646.8	11.78	0.345	-0.013	5.6	0.1	0.213	5.99949	0.399491	0.00123259	0.00158518	0.00440296	0.245	6.79142
6647.79	11.78	0.345	-0.011	5.66	0.1	0.213	5.99949	0.339491	0.00123259	0.00159792	0.00442842	0.245	6.79142
6648.77	11.78	0.345	-0.01	5.705	0.1	0.213	5.99949	0.294491	0.00123259	0.00160428	0.00444116	0.245	6.79142
6649.76	11.78	0.345	-0.009	5.76	0.1	0.213	5.99949	0.239491	0.00123259	0.00161065	0.00445389	0.245	6.79142
6650.85	11.78	0.346	-0.008	5.81	0.1	0.213	5.99949	0.189491	0.001242	0.00161701	0.00447603	0.245	6.79142
6651.83	11.78	0.345	-0.007	5.865	0.1	0.213	5.99949	0.134491	0.00123259	0.00162338	0.00447935	0.245	6.79142
6652.81	11.78	0.345	-0.006	5.905	0.1	0.213	5.99949	0.0944907	0.00123259	0.00162975	0.00449209	0.245	6.79142
6653.8	11.78	0.345	-0.005	5.965	0.1	0.213	5.99949	0.0344907	0.00123259	0.00163611	0.00450482	0.245	6.79142
6654.78	11.78	0.345	-0.004	6.01	0.1	0.213	5.99949	-0.0105093	0.00123259	0.00164248	0.00451755	0.245	6.79142
6655.77	11.78	0.345	-0.003	6.065	0.1	0.213	5.99949	-0.0655093	0.00123259	0.00164885	0.00453028	0.245	6.79142
6656.75	11.78	0.346	-0.002	6.11	0.1	0.213	5.99949	-0.110509	0.001242	0.00165521	0.00455243	0.245	6.79142
6657.85	11.78	0.346	-0.001	6.165	0.1	0.213	5.99949	-0.165509	0.001242	0.00166158	0.00456516	0.245	6.79142
6658.83	11.78	0.346	0	6.21	0.1	0.213	5.99949	-0.210509	0.001242	0.00166794	0.00457789	0.245	6.79142
6659.81	11.78	0.346	0.001	6.265	0.1	0.213	5.99949	-0.265509	0.001242	0.00167431	0.00459062	0.24	6.65282
6660.8	11.78	0.345	0.002	6.31	0.1	0.213	5.99949	-0.310509	0.00123259	0.00168068	0.00459395	0.24	6.65282
6661.78	11.78	0.346	0.002	6.36	0.1	0.213	5.99949	-0.360509	0.001242	0.00168068	0.00460335	0.24	6.65282
6662.77	11.78	0.346	0.004	6.41	0.1	0.213	5.99949	-0.410509	0.001242	0.00169341	0.00462882	0.24	6.65282
6663.76	11.78	0.346	0.004	6.46	0.1	0.213	5.99949	-0.460509	0.001242	0.00169341	0.00462882	0.24	6.65282
6664.85	11.78	0.346	0.005	6.51	0.1	0.213	5.99949	-0.510509	0.001242	0.00169977	0.00464155	0.24	6.65282
6665.83	11.78	0.346	0.006	6.565	0.1	0.213	5.99949	-0.565509	0.001242	0.00170614	0.00465428	0.24	6.65282
6666.81	11.78	0.346	0.007	6.61	0.1	0.213	5.99949	-0.610509	0.001242	0.00171251	0.00466702	0.24	6.65282
6667.8	11.78	0.346	0.008	6.665	0.1	0.213	5.99949	-0.665509	0.001242	0.00171887	0.00467975	0.24	6.65282
6668.79	11.78	0.346	0.009	6.705	0.1	0.213	5.99949	-0.705509	0.001242	0.00172524	0.00469248	0.24	6.65282
6669.77	11.78	0.346	0.01	6.76	0.1	0.213	5.99949	-0.760509	0.001242	0.00173161	0.00470521	0.235	6.51422
6670.75	11.78	0.346	0.011	6.805	0.1	0.213	5.99949	-0.805509	0.001242	0.00173797	0.00471795	0.24	6.65282
6671.84	11.78	0.346	0.012	6.865	0.1	0.213	5.99949	-0.865509	0.001242	0.00174434	0.00473068	0.235	6.51422
6672.83	11.78	0.346	0.013	6.91	0.1	0.213	5.99949	-0.910509	0.001242	0.0017507	0.00474341	0.235	6.51422
6673.81	11.78	0.348	0.014	6.96	0.1	0.213	5.99949	-0.960509	0.00126082	0.00175707	0.00477496	0.235	6.51422
6674.8	11.78	0.346	0.015	7.01	0.1	0.213	5.99949	-1.01051	0.001242	0.00176344	0.00476888	0.235	6.51422
6675.78	11.78	0.348	0.016	7.06	0.1	0.213	5.99949	-1.06051	0.00126082	0.0017698	0.00480043	0.235	6.51422
6676.77	11.78	0.348	0.017	7.11	0.1	0.213	5.99949	-1.11051	0.00126082	0.00177617	0.00481316	0.235	6.51422
6677.75	11.78	0.348	0.018	7.16	0.1	0.213	5.99949	-1.16051	0.00126082	0.00178254	0.00482589	0.235	6.51422
6678.84	11.78	0.348	0.019	7.205	0.1	0.213	5.99949	-1.20551	0.00126082	0.0017889	0.00483862	0.235	6.51422
6679.83	11.78	0.346	0.019	7.265	0.1	0.213	5.99949	-1.26551	0.001242	0.0017889	0.00481981	0.235	6.51422
6680.81	11.78	0.348	0.02	7.305	0.1	0.213	5.99949	-1.30551	0.00126082	0.00179527	0.00485136	0.235	6.51422
6681.8	11.78	0.348	0.021	7.365	0.1	0.213	5.99949	-1.36551	0.00126082	0.00180163	0.00486409	0.235	6.51422
6682.78	11.78	0.348	0.022	7.405	0.1	0.213	5.99949	-1.40551	0.00126082	0.001808	0.00487682	0.235	6.51422
6683.77	11.78	0.348	0.023	7.465	0.1	0.213	5.99949	-1.46551	0.00126082	0.00181437	0.00488955	0.235	6.51422
6684.75	11.8	0.348	0.024	7.505	0.1	0.213	6.00968	-1.49532	0.00126082	0.00182073	0.00490229	0.235	6.51422
6685.85	11.8	0.348	0.025	7.565	0.1	0.213	6.00968	-1.55532	0.00126082	0.0018271	0.00491502	0.235	6.51422
6686.83	11.8	0.348	0.026	7.61	0.1	0.213	6.00968	-1.60032	0.00126082	0.00183346	0.00492775	0.235	6.51422
6687.81	11.8	0.348	0.027	7.66	0.1	0.213	6.00968	-1.65032	0.00126082	0.00183983	0.00494048	0.23	6.37562
6688.8	11.8	0.348	0.028	7.705	0.1	0.213	6.00968	-1.69532	0.00126082	0.0018462	0.00495322	0.23	6.37562
6689.79	11.8	0.348	0.028	7.755	0.1	0.213	6.00968	-1.74532	0.00126082	0.0018462	0.00495322	0.23	6.37562
6690.77	11.78	0.348	0.029	7.805	0.1	0.213	5.99949	-1.80551	0.00126082	0.00185256	0.00496595	0.23	6.37562
6691.76	11.78	0.348	0.03	7.855	0.1	0.213	5.99949	-1.85551	0.00126082	0.00185893	0.00497868	0.23	6.37562
6692.85	11.78	0.35	0.031	7.91	0.1	0.213	5.99949	-1.91051	0.00127964	0.0018653	0.00501023	0.23	6.37562
6693.83	11.76	0.35	0.032	7.965	0.1	0.213	5.9893	-1.9757	0.00127964	0.00187166	0.00502296	0.23	6.37562
6694.81	11.76	0.348	0.033	8.005	0.1	0.213	5.9893	-2.0157	0.00126082	0.00187803	0.00501688	0.23	6.37562
6695.8	11.78	0.348	0.034	8.06	0.1	0.213	5.99949	-2.06051	0.00126082	0.00188439	0.00502961	0.23	6.37562
6696.78	11.8	0.35	0.035	8.105	0.1	0.213	6.00968	-2.09532	0.00127964	0.00189076	0.00506116	0.23	6.37562
6697.77	11.78	0.35	0.036	8.165	0.1	0.213	5.99949	-2.16551	0.00127964	0.00189713	0.00507389	0.23	6.37562
6698.76	11.78	0.35	0.037	8.205	0.1	0.213	5.99949	-2.20551	0.00127964	0.00190349	0.00508662	0.23	6.37562
6699.85	11.8	0.35	0.038	8.265	0.1	0.213	6.00968	-2.25532	0.00127964	0.00190986	0.00509936	0.23	6.37562
6700.83	11.78	0.35	0.039	8.31	0.1	0.213	5.99949	-2.31051	0.00127964	0.00191623	0.00511209	0.23	6.37562
6701.81	11.8	0.35	0.039	8.37	0.1	0.213	6.00968	-2.36032	0.00127964	0.00191623	0.00511209	0.23	6.37562
6702.8	11.78	0.35	0.04	8.4	0.1	0.213	5.99949	-2.40051	0.00127964	0.00192259	0.00512482	0.225	6.23702
6703.79	11.8	0.35	0.041	8.445	0.1	0.213	6.00968	-2.43532	0.00127964	0.00192896	0.00513755	0.225	6.23702
6704.77	11.78	0.35	0.042	8.37	0.1	0.213	5.99949	-2.37051	0.00127964	0.00193532	0.00515029	0.225	6.23702
6705.75	11.78	0.35	0.042	8.3	0.1	0.213	5.99949	-2.30051	0.00127964	0.00193532	0.00515029	0.225	6.23702
6706.84	11.78	0.35	0.042	8.32	0.1	0.213	5.99949	-2.32051	0.00127964	0.00193532	0.00515029	0.225	6.23702
6707.83	11.78	0.35	0.042	8.37	0.1	0.213	5.99949	-2.37051	0.00127964	0.00193532	0.00515029	0.225	6.23702
6708.81	11.78	0.35	0.042	8.39	0.1	0.213	5.99949	-2.39051	0.00127964	0.00193532	0.00515029	0.225	6.23702
6709.8	11.78	0.35	0.042	8.42	0.1	0.213	5.99949	-2.42051	0.00127964	0.00193532	0.00515029	0.225	6.23702
6710.78	11.78	0.35	0.042	8.435	0.1	0.213	5.99949	-2.43551	0.00127964	0.00193532	0.00515029	0.225	6.23702
6711.77	11.78	0.35	0.043	8.45	0.1	0.213	5.99949	-2.45051	0.00127964	0.00194169	0.00516302	0.225	6.23702
6712.76	11.78	0.35	0.043	8.455	0.1	0.213	5.99949	-2.45551	0.00127964	0.00194169	0.00516302	0.225	6.23702
6713.85	11.78	0.35	0.043	8.47	0.1	0.213	5.99949	-2.47051	0.00127964	0.00194169	0.00516302	0.225	6.23702
6714.83	11.78	0.35	0.044	8.475	0.1	0.213	5.99949	-2.47551	0.00127964	0.00194806	0.00517575	0.225	6.23702
6715.81	11.78	0.35	0.044	8.485	0.1	0.213	5.99949	-2.48551	0.00127964	0.00194806	0.00517575	0.225	6.23702
6716.8	11.78	0.35	0.044	8.495	0.1	0.213	5.99949	-2.49551	0.00127964	0.00194806	0.00517575	0.225	6.23702
6717.78	11.78	0.35	0.044	8.505	0.1	0.213	5.99949	-2.50551	0.00127964	0.00194806	0.00517575	0.225	6.23702
6718.77	11.78	0.35	0.044	8.51	0.1	0.213	5.99949	-2.51051	0.00127964	0.00194806	0.00517575	0.225	6.23702
6719.75	11.78	0.35	0.045	8.52	0.1	0.213	5.99949	-2.52051	0.00127964	0.00195442	0.00518848	0.225	6.23702
6720.84	11.78	0.35	0.045	8.525	0.1	0.213	5.99949	-2.52551	0.00127964	0.00195442	0.00518848	0.225	6.23702
6721.83	11.78	0.35	0.045	8.54	0.1	0.213	5.99949	-2.54051	0.00127964	0.00195442	0.00518848	0.22	6.09842
6722.81	11.78	0.35	0.045	8.535	0.1	0.213	5.99949	-2.53551	0.00127964	0.00195442	0.00518848	0.22	6.09842
6723.8	11.78	0.35	0.045	8.55	0.1	0.213	5.99949	-2.55051	0.00127964	0.00195442	0.00518848	0.225	6.23702
6724.78	11.78	0.35	0.046	8.55	0.1	0.213	5.99949	-2.55051	0.00127964	0.00196079	0.00520122	0.22	6.09842
6725.77	11.78	0.35	0.046	8.56	0.1	0.213	5.99949	-2.56051	0.00127964	0.00196079	0.00520122	0.22	6.09842
6726.75	11.78	0.35	0.046	8.56	0.1	0.213	5.99949	-2.56051	0.00127964	0.00196079	0.00520122	0.22	6.09842
6727.85	11.78	0.35	0.046	8.575	0.1	0.213	5.99949	-2.57551	0.00127964	0.00196079	0.00520122	0.22	6.09842
6728.83	11.78	0.35	0.046	8.57	0.1	0.213	5.99949	-2.57051	0.00127964	0.00196079	0.00520122	0.22	6.09842
6729.81	11.78	0.35	0.046	8.58	0.1	0.213	5.99949	-2.58051	0.00127964	0.00196079	0.00520122	0.22	6.09842
6730.8	11.78	0.35	0.046	8.58	0.1	0.213	5.99949	-2.58051	0.00127964	0.00196079	0.00520122	0.22	6.09842
6731.78	11.78	0.35	0.046	8.59	0.1	0.213	5.99949	-2.59051	0.00127964	0.00196079	0.00520122	0.22	6.09842
6732.77	11.78	0.35	0.047	8.585	0.1	0.213	5.99949	-2.58551	0.00127964	0.00196716	0.00521395	0.22	6.09842
6733.75	11.78	0.35	0.047	8.59	0.1	0.213	5.99949	-2.59051	0.00127964	0.00196716	0.00521395	0.22	6.09842
6734.84	11.78	0.35	0.047	8.59	0.1	0.213	5.99949	-2.59051	0.00127964	0.00196716	0.00521395	0.22	6.09842
6735.83	11.78	0.35	0.047	8.595	0.1	0.213	5.99949	-2.59551	0.00127964	0.00196716	0.00521395	0.22	6.09842
6736.81	11.78	0.35	0.047	8.595	0.1	0.213	5.99949	-2.59551	0.00127964	0.00196716	0.00521395	0.22	6.09842
6737.8	11.78	0.35	0.047	8.6	0.1	0.213	5.99949	-2.60051	0.00127964	0.00196716	0.00521395	0.22	6.09842
6738.78	11.78	0.35	0.047	8.6	0.1	0.213	5.99949	-2.60051	0.00127964	0.00196716	0.00521395	0.22	6.09842
6739.77	11.78	0.35	0.047	8.6	0.1	0.213	5.99949	-2.60051	0.00127964	0.00196716	0.00521395	0.22	6.09842
6740.75	11.78	0.35	0.047	8.6	0.1	0.213	5.99949	-2.60051	0.00127964	0.00196716	0.00521395	0.22	6.09842
6741.85	11.78	0.35	0.047	8.6	0.1	0.213	5.99949	-2.60051	0.00127964	0.00196716	0.00521395	0.22	6.09842
6742.83	11.78	0.35	0.047	8.6	0.1	0.213	5.99949	-2.60051	0.00127964	0.00196716	0.00521395	0.22	6.09842
6743.81	11.78	0.35	0.048	8.6	0.1	0.213	5.99949	-2.60051	0.00127964	0.00197352	0.00522668	0.22	6.09842
6744.8	11.78	0.35	0.048	8.6	0.1	0.213	5.99949	-2.60051	0.00127964	0.00197352	0.00522668	0.22	6.09842
6745.78	11.78	0.35	0.048	8.6	0.1	0.213	5.99949	-2.60051	0.00127964	0.00197352	0.00522668	0.22	6.09842
6746.77	11.78	0.35	0.048	8.6	0.1	0.213	5.99949	-2.60051	0.00127964	0.00197352	0.00522668	0.22	6.09842
6747.75	11.78	0.35	0.048	8.6	0.1	0.213	5.99949	-2.60051	0.00127964	0.00197352	0.00522668	0.22	6.09842
6748.84	11.78	0.35	0.048	8.6	0.1	0.213	5.99949	-2.60051	0.00127964	0.00197352	0.00522668	0.22	6.09842
6749.83	11.78	0.35	0.048	8.6	0.1	0.213	5.99949	-2.60051	0.00127964	0.00197352	0.00522668	0.22	6.09842
6750.81	11.78	0.35	0.048	8.6	0.1	0.213	5.99949	-2.60051	0.00127964	0.00197352	0.00522668	0.22	6.09842
6751.8	11.78	0.35	0.048	8.6	0.1	0.213	5.99949	-2.60051	0.00127964	0.00197352	0.00522668	0.22	6.09842
6752.79	11.78	0.35	0.048	8.6	0.1	0.213	5.99949	-2.60051	0.00127964	0.00197352	0.00522668	0.22	6.09842
6753.77	11.78	0.35	0.048	8.6	0.1	0.213	5.99949	-2.60051	0.00127964	0.00197352	0.00522668	0.22	6.09842
6754.75	11.78	0.35	0.048	8.6	0.1	0.213	5.99949	-2.60051	0.00127964	0.00197352	0.00522668	0.22	6.09842
6755.84	11.78	0.35	0.048	8.6	0.1	0.213	5.99949	-2.60051	0.00127964	0.00197352	0.00522668	0.22	6.09842
6756.83	11.78	0.35	0.048	8.6	0.1	0.213	5.99949	-2.60051	0.00127964	0.00197352	0.00522668	0.22	6.09842
6757.81	11.78	0.35	0.048	8.6	0.1	0.213	5.99949	-2.60051	0.00127964	0.00197352	0.00522668	0.22	6.09842
6758.8	11.78	0.35	0.048	8.6	0.1	0.213	5.99949	-2.60051	0.00127964	0.00197352	0.00522668	0.22	6.09842
6759.78	11.78	0.35	0.048	8.6	0.1	0.213	5.99949	-2.60051	0.00127964	0.00197352	0.00522668	0.22	6.09842
6760.77	11.78	0.35	0.048	8.6	0.1	0.213	5.99949	-2.60051	0.00127964	0.00197352	0.00522668	0.22	6.09842
6761.75	11.78	0.35	0.048	8.6	0.1	0.213	5.99949	-2.60051	0.00127964	0.00197352	0.00522668	0.22	6.09842
6762.85	11.78	0.35	0.048	8.6	0.1	0.213	5.99949	-2.60051	0.00127964	0.00197352	0.00522668	0.22	6.09842
6763.83	11.78	0.35	0.048	8.6	0.1	0.213	5.99949	-2.60051	0.00127964	0.00197352	0.00522668	0.22	6.09842
6764.81	11.78	0.35	0.048	8.6	0.1	0.213	5.99949	-2.60051	0.00127964	0.00197352	0.00522668	0.22	6.09842
6765.8	11.78	0.35	0.048	8.6	0.1	0.213	5.99949	-2.60051	0.00127964	0.00197352	0.00522668	0.22	6.09842
6766.78	11.78	0.35	0.049	8.6	0.1	0.213	5.99949	-2.60051	0.00127964	0.00197989	0.00523941	0.22	6.09842
6767.77	11.78	0.35	0.049	8.6	0.1	0.213	5.99949	-2.60051	0.00127964	0.00197989	0.00523941	0.22	6.09842
6768.76	11.78	0.35	0.049	8.6	0.1	0.213	5.99949	-2.60051	0.00127964	0.00197989	0.00523941	0.22	6.09842
6769.85	11.78	0.35	0.049	8.6	0.1	0.213	5.99949	-2.60051	0.00127964	0.00197989	0.00523941	0.22	6.09842
6770.83	11.76	0.35	0.049	8.6	0.1	0.213	5.9893	-2.6107	0.00127964	0.00197989	0.00523941	0.22	6.09842
6771.81	11.78	0.35	0.049	8.6	0.1	0.213	5.99949	-2.60051	0.00127964	0.00197989	0.00523941	0.22	6.09842
6772.8	11.76	0.35	0.049	8.6	0.1	0.213	5.9893	-2.6107	0.00127964	0.00197989	0.00523941	0.22	6.09842
6773.79	11.78	0.35	0.049	8.6	0.1	0.213	5.99949	-2.60051	0.00127964	0.00197989	0.00523941	0.22	6.09842
6774.77	11.76	0.35	0.049	8.6	0.1	0.213	5.9893	-2.6107	0.00127964	0.00197989	0.00523941	0.22	6.09842
6775.75	11.78	0.35	0.049	8.6	0.1	0.213	5.99949	-2.60051	0.00127964	0.00197989	0.00523941	0.22	6.09842
6776.84	11.76	0.35	0.049	8.6	0.1	0.213	5.9893	-2.6107	0.00127964	0.00197989	0.00523941	0.22	6.09842
6777.83	11.78	0.35	0.049	8.6	0.1	0.213	5.99949	-2.60051	0.00127964	0.00197989	0.00523941	0.22	6.09842
6778.81	11.76	0.35	0.049	8.6	0.1	0.213	5.9893	-2.6107	0.00127964	0.00197989	0.00523941	0.22	6.09842
6779.8	11.78	0.35	0.049	8.6	0.1	0.213	5.99949	-2.60051	0.00127964	0.00197989	0.00523941	0.22	6.09842
6780.78	11.76	0.35	0.049	8.6	0.1	0.213	5.9893	-2.6107	0.00127964	0.00197989	0.00523941	0.22	6.09842
6781.77	11.78	0.35	0.049	8.6	0.1	0.213	5.99949	-2.60051	0.00127964	0.00197989	0.00523941	0.22	6.09842
6782.75	11.78	0.35	0.049	8.6	0.1	0.213	5.99949	-2.60051	0.00127964	0.00197989	0.00523941	0.22	6.09842
6783.85	11.78	0.35	0.049	8.6	0.1	0.213	5.99949	-2.60051	0.00127964	0.00197989	0.00523941	0.22	6.09842
6784.83	11.78	0.35	0.049	8.6	0.1	0.213	5.99949	-2.60051	0.00127964	0.00197989	0.00523941	0.22	6.09842
6785.81	11.78	0.35	0.049	8.6	0.1	0.213	5.99949	-2.60051	0.00127964	0.00197989	0.00523941	0.22	6.09842
6786.8	11.78	0.35	0.049	8.6	0.1	0.213	5.99949	-2.60051	0.00127964	0.00197989	0.00523941	0.22	6.09842
6787.78	11.8	0.35	0.049	8.6	0.1	0.213	6.00968	-2.59032	0.00127964	0.00197989	0.00523941	0.22	6.09842
6788.77	11.8	0.35	0.049	8.6	0.1	0.213	6.00968	-2.59032	0.00127964	0.00197989	0.00523941	0.22	6.09842
6789.75	11.8	0.35	0.049	8.6	0.1	0.213	6.00968	-2.59032	0.00127964	0.00197989	0.00523941	0.22	6.09842
6790.85	11.78	0.35	0.049	8.6	0.1	0.213	5.99949	-2.60051	0.00127964	0.00197989	0.00523941	0.22	6.09842
6791.83	11.8	0.35	0.049	8.6	0.1	0.213	6.00968	-2.59032	0.00127964	0.00197989	0.00523941	0.22	6.09842
6792.81	11.78	0.35	0.049	8.6	0.1	0.213	5.99949	-2.60051	0.00127964	0.00197989	0.00523941	0.22	6.09842
6793.8	11.78	0.35	0.049	8.6	0.1	0.213	5.99949	-2.60051	0.00127964	0.00197989	0.00523941	0.22	6.09842
6794.78	11.78	0.35	0.049	8.6	0.1	0.213	5.99949	-2.60051	0.00127964	0.00197989	0.00523941	0.22	6.09842
6795.77	11.78	0.35	0.049	8.6	0.1	0.213	5.99949	-2.60051	0.00127964	0.00197989	0.00523941	0.22	6.09842
6796.76	11.78	0.35	0.049	8.6	0.1	0.213	5.99949	-2.60051	0.00127964	0.00197989	0.00523941	0.22	6.09842
6797.84	11.78	0.35	0.049	8.6	0.1	0.213	5.99949	-2.60051	0.00127964	0.00197989	0.00523941	0.22	6.09842
6798.83	11.78	0.35	0.05	8.6	0.1	0.213	5.99949	-2.60051	0.00127964	0.00198625	0.00525215	0.22	6.09842
6799.81	11.78	0.35	0.05	8.6	0.1	0.213	5.99949	-2.60051	0.00127964	0.00198625	0.00525215	0.22	6.09842
6800.8	11.78	0.35	0.05	8.6	0.1	0.213	5.99949	-2.60051	0.00127964	0.00198625	0.00525215	0.215	5.95982
6801.78	11.78	0.35	0.05	8.6	0.1	0.213	5.99949	-2.60051	0.00127964	0.00198625	0.00525215	0.215	5.95982
6802.77	11.78	0.35	0.05	8.6	0.1	0.213	5.99949	-2.60051	0.00127964	0.00198625	0.00525215	0.215	5.95982
6803.76	11.78	0.35	0.05	8.6	0.1	0.213	5.99949	-2.60051	0.00127964	0.00198625	0.00525215	0.22	6.09842
6804.84	11.78	0.35	0.05	8.6	0.1	0.213	5.99949	-2.60051	0.00127964	0.00198625	0.00525215	0.215	5.95982
6805.83	11.78	0.35	0.05	8.6	0.1	0.213	5.99949	-2.60051	0.00127964	0.00198625	0.00525215	0.22	6.09842
6806.81	11.78	0.35	0.05	8.6	0.1	0.213	5.99949	-2.60051	0.00127964	0.00198625	0.00525215	0.22	6.09842
6807.8	11.78	0.35	0.05	8.6	0.1	0.213	5.99949	-2.60051	0.00127964	0.00198625	0.00525215	0.215	5.95982
6808.79	11.78	0.35	0.05	8.6	0.1	0.213	5.99949	-2.60051	0.00127964	0.00198625	0.00525215	0.22	6.09842
6809.77	11.78	0.35	0.05	8.6	0.1	0.213	5.99949	-2.60051	0.00127964	0.00198625	0.00525215	0.22	6.09842
6810.75	11.78	0.35	0.05	8.6	0.1	0.213	5.99949	-2.60051	0.00127964	0.00198625	0.00525215	0.22	6.09842
6811.85	11.78	0.35	0.05	8.6	0.1	0.213	5.99949	-2.60051	0.00127964	0.00198625	0.00525215	0.215	5.95982
6812.83	11.78	0.35	0.05	8.6	0.1	0.213	5.99949	-2.60051	0.00127964	0.00198625	0.00525215	0.22	6.09842
6813.81	11.78	0.35	0.05	8.6	0.1	0.213	5.99949	-2.60051	0.00127964	0.00198625	0.00525215	0.215	5.95982
6814.8	11.78	0.35	0.05	8.6	0.1	0.213	5.99949	-2.60051	0.00127964	0.00198625	0.00525215	0.22	6.09842
6815.78	11.78	0.35	0.05	8.6	0.1	0.213	5.99949	-2.60051	0.00127964	0.00198625	0.00525215	0.215	5.95982
6816.77	11.78	0.35	0.05	8.6	0.1	0.213	5.99949	-2.60051	0.00127964	0.00198625	0.00525215	0.215	5.95982
6817.76	11.78	0.35	0.05	8.6	0.1	0.213	5.99949	-2.60051	0.00127964	0.00198625	0.00525215	0.215	5.95982
6818.85	11.78	0.35	0.05	8.6	0.1	0.213	5.99949	-2.60051	0.00127964	0.00198625	0.00525215	0.215	5.95982
6819.83	11.78	0.35	0.05	8.6	0.1	0.213	5.99949	-2.60051	0.00127964	0.00198625	0.00525215	0.215	5.95982
6820.81	11.78	0.35	0.05	8.6	0.1	0.213	5.99949	-2.60051	0.00127964	0.00198625	0.00525215	0.215	5.95982
6821.8	11.78	0.35	0.05	8.6	0.1	0.213	5.99949	-2.60051	0.00127964	0.00198625	0.00525215	0.215	5.95982
6822.79	11.78	0.35	0.05	8.6	0.1	0.213	5.99949	-2.60051	0.00127964	0.00198625	0.00525215	0.215	5.95982
6823.77	11.78	0.35	0.05	8.6	0.1	0.213	5.99949	-2.60051	0.00127964	0.00198625	0.00525215	0.215	5.95982
6824.75	11.78	0.35	0.05	8.6	0.1	0.213	5.99949	-2.60051	0.00127964	0.00198625	0.00525215	0.215	5.95982
6825.84	11.78	0.35	0.05	8.6	0.1	0.213	5.99949	-2.60051	0.00127964	0.00198625	0.00525215	0.215	5.95982
6826.83	11.78	0.35	0.05	8.6	0.1	0.213	5.99949	-2.60051	0.00127964	0.00198625	0.00525215	0.215	5.95982
6827.81	11.78	0.35	0.05	8.6	0.1	0.213	5.99949	-2.60051	0.00127964	0.00198625	0.00525215	0.215	5.95982
6828.8	11.78	0.35	0.05	8.6	0.1	0.213	5.99949	-2.60051	0.00127964	0.00198625	0.00525215	0.215	5.95982
6829.79	11.78	0.35	0.05	8.6	0.1	0.213	5.99949	-2.60051	0.00127964	0.00198625	0.00525215	0.215	5.95982
6830.77	11.78	0.35	0.05	8.6	0.1	0.213	5.99949	-2.60051	0.00127964	0.00198625	0.00525215	0.215	5.95982
6831.76	11.78	0.35	0.05	8.6	0.1	0.213	5.99949	-2.60051	0.00127964	0.00198625	0.00525215	0.215	5.95982
6832.84	11.78	0.35	0.05	8.6	0.1	0.213	5.99949	-2.60051	0.00127964	0.00198625	0.00525215	0.215	5.95982
6833.83	11.78	0.35	0.05	8.6	0.1	0.213	5.99949	-2.60051	0.00127964	0.00198625	0.00525215	0.215	5.95982
6834.81	11.78	0.35	0.05	8.6	0.1	0.213	5.99949	-2.60051	0.00127964	0.00198625	0.00525215	0.215	5.95982
6835.8	11.78	0.35	0.05	8.6	0.1	0.213	5.99949	-2.60051	0.00127964	0.00198625	0.00525215	0.215	5.95982
6836.78	11.78	0.35	0.05	8.6	0.1	0.213	5.99949	-2.60051	0.00127964	0.00198625	0.00525215	0.215	5.95982
6837.77	11.78	0.35	0.05	8.6	0.1	0.213	5.99949	-2.60051	0.00127964	0.00198625	0.00525215	0.215	5.95982
6838.75	11.78	0.35	0.05	8.6	0.1	0.213	5.99949	-2.60051	0.00127964	0.00198625	0.00525215	0.215	5.95982
6839.84	11.78	0.35	0.05	8.6	0.1	0.213	5.99949	-2.60051	0.00127964	0.00198625	0.00525215	0.215	5.95982
6840.83	11.78	0.35	0.05	8.6	0.1	0.213	5.99949	-2.60051	0.00127964	0.00198625	0.00525215	0.215	5.95982
6841.81	11.78	0.35	0.05	8.6	0.1	0.213	5.99949	-2.60051	0.00127964	0.00198625	0.00525215	0.215	5.95982
6842.8	11.78	0.35	0.05	8.6	0.1	0.213	5.99949	-2.60051	0.00127964	0.00198625	0.00525215	0.215	5.95982
6843.78	11.78	0.35	0.05	8.6	0.1	0.213	5.99949	-2.60051	0.00127964	0.00198625	0.00525215	0.215	5.95982
6844.77	11.78	0.35	0.05	8.6	0.1	0.213	5.99949	-2.60051	0.00127964	0.00198625	0.00525215	0.215	5.95982
6845.75	11.78	0.35	0.05	8.6	0.1	0.213	5.99949	-2.60051	0.00127964	0.00198625	0.00525215	0.215	5.95982
6846.85	11.78	0.35	0.05	8.6	0.1	0.213	5.99949	-2.60051	0.00127964	0.00198625	0.00525215	0.215	5.95982
6847.83	11.78	0.35	0.05	8.6	0.1	0.213	5.99949	-2.60051	0.00127964	0.00198625	0.00525215	0.215	5.95982
6848.81	11.78	0.35	0.05	8.6	0.1	0.213	5.99949	-2.60051	0.00127964	0.00198625	0.00525215	0.215	5.95982
6849.8	11.78	0.35	0.05	8.6	0.1	0.213	5.99949	-2.60051	0.00127964	0.00198625	0.00525215	0.215	5.95982
6850.78	11.78	0.35	0.05	8.6	0.1	0.213	5.99949	-2.60051	0.00127964	0.00198625	0.00525215	0.215	5.95982
6851.77	11.78	0.35	0.05	8.6	0.1	0.213	5.99949	-2.60051	0.00127964	0.00198625	0.00525215	0.215	5.95982
6852.75	11.78	0.35	0.05	8.6	0.1	0.213	5.99949	-2.60051	0.00127964	0.00198625	0.00525215	0.215	5.95982
6853.85	11.78	0.35	0.05	8.6	0.1	0.213	5.99949	-2.60051	0.00127964	0.00198625	0.00525215	0.215	5.95982
6854.83	11.78	0.348	0.051	8.6	0.1	0.213	5.99949	-2.60051	0.00126082	0.00199262	0.00524606	0.215	5.95982
6855.81	11.78	0.35	0.051	8.6	0.1	0.213	5.99949	-2.60051	0.00127964	0.00199262	0.00526488	0.215	5.95982
6856.8	11.78	0.35	0.051	8.6	0.1	0.213	5.99949	-2.60051	0.00127964	0.00199262	0.00526488	0.215	5.95982
6857.78	11.78	0.35	0.051	8.6	0.1	0.213	5.99949	-2.60051	0.00127964	0.00199262	0.00526488	0.215	5.95982
6858.77	11.78	0.35	0.051	8.595	0.1	0.213	5.99949	-2.59551	0.00127964	0.00199262	0.00526488	0.215	5.95982
6859.75	11.78	0.35	0.051	8.59	0.1	0.213	5.99949	-2.59051	0.00127964	0.00199262	0.00526488	0.215	5.95982
6860.85	11.78	0.35	0.05	8.55	0.1	0.213	5.99949	-2.55051	0.00127964	0.00198625	0.00525215	0.215	5.95982
6861.83	11.78	0.35	0.05	8.49	0.1	0.213	5.99949	-2.49051	0.00127964	0.00198625	0.00525215	0.215	5.95982
6862.81	11.78	0.35	0.05	8.435	0.1	0.213	5.99949	-2.43551	0.00127964	0.00198625	0.00525215	0.215	5.95982
6863.8	11.78	0.35	0.05	8.39	0.1	0.213	5.99949	-2.39051	0.00127964	0.00198625	0.00525215	0.215	5.95982
6864.78	11.78	0.35	0.049	8.335	0.1	0.213	5.99949	-2.33551	0.00127964	0.00197989	0.00523941	0.215	5.95982
6865.77	11.78	0.35	0.049	8.28	0.1	0.213	5.99949	-2.28051	0.00127964	0.00197989	0.00523941	0.215	5.95982
6866.75	11.78	0.35	0.049	8.235	0.1	0.213	5.99949	-2.23551	0.00127964	0.00197989	0.00523941	0.215	5.95982
6867.84	11.78	0.35	0.048	8.175	0.1	0.213	5.99949	-2.17551	0.00127964	0.00197352	0.00522668	0.215	5.95982
6868.83	11.78	0.35	0.048	8.13	0.1	0.213	5.99949	-2.13051	0.00127964	0.00197352	0.00522668	0.215	5.95982
6869.81	11.78	0.35	0.047	8.075	0.1	0.213	5.99949	-2.07551	0.00127964	0.00196716	0.00521395	0.215	5.95982
6870.8	11.78	0.35	0.047	8.035	0.1	0.213	5.99949	-2.03551	0.00127964	0.00196716	0.00521395	0.215	5.95982
6871.78	11.78	0.348	0.047	7.985	0.1	0.213	5.99949	-1.98551	0.00126082	0.00196716	0.00519513	0.215	5.95982
6872.77	11.78	0.35	0.046	7.93	0.1	0.213	5.99949	-1.93051	0.00127964	0.00196079	0.00520122	0.215	5.95982
6873.75	11.78	0.348	0.046	7.89	0.1	0.213	5.99949	-1.89051	0.00126082	0.00196079	0.0051824	0.215	5.95982
6874.84	11.78	0.35	0.045	7.825	0.1	0.213	5.99949	-1.82551	0.00127964	0.00195442	0.00518848	0.215	5.95982
6875.83	11.78	0.35	0.045	7.78	0.1	0.213	5.99949	-1.78051	0.00127964	0.00195442	0.00518848	0.215	5.95982
6876.81	11.78	0.35	0.045	7.73	0.1	0.213	5.99949	-1.73051	0.00127964	0.00195442	0.00518848	0.215	5.95982
6877.8	11.78	0.35	0.044	7.69	0.1	0.213	5.99949	-1.69051	0.00127964	0.00194806	0.00517575	0.215	5.95982
6878.78	11.78	0.35	0.044	7.635	0.1	0.213	5.99949	-1.63551	0.00127964	0.00194806	0.00517575	0.215	5.95982
6879.77	11.78	0.35	0.043	7.58	0.1	0.213	5.99949	-1.58051	0.00127964	0.00194169	0.00516302	0.215	5.95982
6880.75	11.78	0.35	0.043	7.545	0.1	0.213	5.99949	-1.54551	0.00127964	0.00194169	0.00516302	0.215	5.95982
6881.85	11.78	0.348	0.043	7.475	0.1	0.213	5.99949	-1.47551	0.00126082	0.00194169	0.0051442	0.215	5.95982
6882.83	11.78	0.348	0.042	7.43	0.1	0.213	5.99949	-1.43051	0.00126082	0.00193532	0.00513147	0.215	5.95982
6883.81	11.78	0.348	0.042	7.375	0.1	0.213	5.99949	-1.37551	0.00126082	0.00193532	0.00513147	0.215	5.95982
6884.8	11.78	0.348	0.041	7.335	0.1	0.213	5.99949	-1.33551	0.00126082	0.00192896	0.00511874	0.215	5.95982
6885.79	11.78	0.348	0.041	7.285	0.1	0.213	5.99949	-1.28551	0.00126082	0.00192896	0.00511874	0.215	5.95982
6886.77	11.78	0.35	0.04	7.23	0.1	0.213	5.99949	-1.23051	0.00127964	0.00192259	0.00512482	0.215	5.95982
6887.75	11.78	0.348	0.04	7.18	0.1	0.213	5.99949	-1.18051	0.00126082	0.00192259	0.005106	0.215	5.95982
6888.85	11.78	0.348	0.039	7.13	0.1	0.213	5.99949	-1.13051	0.00126082	0.00191623	0.00509327	0.215	5.95982
6889.83	11.78	0.348	0.039	7.08	0.1	0.213	5.99949	-1.08051	0.00126082	0.00191623	0.00509327	0.215	5.95982
6890.81	11.76	0.35	0.038	7.03	0.1	0.213	5.9893	-1.0407	0.00127964	0.00190986	0.00509936	0.215	5.95982
6891.8	11.78	0.348	0.038	6.985	0.1	0.213	5.99949	-0.985509	0.00126082	0.00190986	0.00508054	0.215	5.95982
6892.78	11.76	0.348	0.037	6.93	0.1	0.213	5.9893	-0.940695	0.00126082	0.00190349	0.00506781	0.215	5.95982
6893.77	11.76	0.348	0.037	6.885	0.1	0.213	5.9893	-0.895695	0.00126082	0.00190349	0.00506781	0.215	5.95982
6894.75	11.76	0.348	0.036	6.84	0.1	0.213	5.9893	-0.850695	0.00126082	0.00189713	0.00505507	0.215	5.95982
6895.84	11.78	0.348	0.036	6.775	0.1	0.213	5.99949	-0.775509	0.00126082	0.00189713	0.00505507	0.215	5.95982
6896.83	11.78	0.348	0.035	6.73	0.1	0.213	5.99949	-0.730509	0.00126082	0.00189076	0.00504234	0.215	5.95982
6897.81	11.78	0.348	0.034	6.675	0.1	0.213	5.99949	-0.675509	0.00126082	0.00188439	0.00502961	0.215	5.95982
6898.8	11.78	0.348	0.034	6.635	0.1	0.213	5.99949	-0.635509	0.00126082	0.00188439	0.00502961	0.215	5.95982
6899.78	11.78	0.348	0.033	6.585	0.1	0.213	5.99949	-0.585509	0.00126082	0.00187803	0.00501688	0.215	5.95982
6900.77	11.78	0.348	0.033	6.53	0.1	0.213	5.99949	-0.530509	0.00126082	0.00187803	0.00501688	0.215	5.95982
6901.75	11.78	0.348	0.032	6.48	0.1	0.213	5.99949	-0.480509	0.00126082	0.00187166	0.00500414	0.215	5.95982
6902.84	11.78	0.348	0.031	6.43	0.1	0.213	5.99949	-0.430509	0.00126082	0.0018653	0.00499141	0.215	5.95982
6903.83	11.78	0.348	0.031	6.38	0.1	0.213	5.99949	-0.380509	0.00126082	0.0018653	0.00499141	0.215	5.95982
6904.81	11.78	0.348	0.03	6.325	0.1	0.213	5.99949	-0.325509	0.00126082	0.00185893	0.00497868	0.215	5.95982
6905.8	11.78	0.348	0.03	6.28	0.1	0.213	5.99949	-0.280509	0.00126082	0.00185893	0.00497868	0.215	5.95982
6906.78	11.78	0.348	0.029	6.235	0.1	0.213	5.99949	-0.235509	0.00126082	0.00185256	0.00496595	0.215	5.95982
6907.77	11.78	0.348	0.028	6.18	0.1	0.213	5.99949	-0.180509	0.00126082	0.0018462	0.00495322	0.215	5.95982
6908.76	11.78	0.348	0.028	6.14	0.1	0.213	5.99949	-0.140509	0.00126082	0.0018462	0.00495322	0.215	5.95982
6909.85	11.78	0.348	0.027	6.075	0.1	0.213	5.99949	-0.0755093	0.00126082	0.00183983	0.00494048	0.21	5.82122
6910.83	11.78	0.348	0.026	6.03	0.1	0.213	5.99949	-0.0305093	0.00126082	0.00183346	0.00492775	0.215	5.95982
6911.81	11.78	0.348	0.026	5.975	0.1	0.213	5.99949	0.0244907	0.00126082	0.00183346	0.00492775	0.215	5.95982
6912.8	11.78	0.348	0.025	5.935	0.1	0.213	5.99949	0.0644907	0.00126082	0.0018271	0.00491502	0.215	5.95982
6913.79	11.78	0.348	0.024	5.88	0.1	0.213	5.99949	0.119491	0.00126082	0.00182073	0.00490229	0.21	5.82122
6914.77	11.78	0.348	0.023	5.83	0.1	0.213	5.99949	0.169491	0.00126082	0.00181437	0.00488955	0.215	5.95982
6915.75	11.78	0.348	0.023	5.78	0.1	0.213	5.99949	0.219491	0.00126082	0.00181437	0.00488955	0.215	5.95982
6916.85	11.78	0.35	0.022	5.725	0.1	0.213	5.99949	0.274491	0.00127964	0.001808	0.00489564	0.21	5.82122
6917.83	11.78	0.348	0.021	5.675	0.1	0.213	5.99949	0.324491	0.00126082	0.00180163	0.00486409	0.215	5.95982
6918.81	11.78	0.348	0.02	5.635	0.1	0.213	5.99949	0.364491	0.00126082	0.00179527	0.00485136	0.21	5.82122
6919.8	11.78	0.348	0.019	5.58	0.1	0.213	5.99949	0.419491	0.00126082	0.0017889	0.00483862	0.215	5.95982
6920.78	11.78	0.348	0.019	5.54	0.1	0.213	5.99949	0.459491	0.00126082	0.0017889	0.00483862	0.21	5.82122
6921.77	11.78	0.348	0.018	5.48	0.1	0.213	5.99949	0.519491	0.00126082	0.00178254	0.00482589	0.21	5.82122
6922.75	11.78	0.348	0.017	5.44	0.1	0.213	5.99949	0.559491	0.00126082	0.00177617	0.00481316	0.215	5.95982
6923.85	11.78	0.348	0.016	5.375	0.1	0.213	5.99949	0.624491	0.00126082	0.0017698	0.00480043	0.215	5.95982
6924.83	11.78	0.348	0.015	5.33	0.1	0.213	5.99949	0.669491	0.00126082	0.00176344	0.00478769	0.215	5.95982
6925.81	11.78	0.348	0.014	5.275	0.1	0.213	5.99949	0.724491	0.00126082	0.00175707	0.00477496	0.21	5.82122
6926.8	11.78	0.348	0.014	5.235	0.1	0.213	5.99949	0.764491	0.00126082	0.00175707	0.00477496	0.215	5.95982
6927.78	11.78	0.348	0.013	5.185	0.1	0.213	5.99949	0.814491	0.00126082	0.0017507	0.00476223	0.215	5.95982
6928.77	11.78	0.348	0.012	5.135	0.1	0.213	5.99949	0.864491	0.00126082	0.00174434	0.0047495	0.215	5.95982
6929.75	11.78	0.348	0.011	5.08	0.1	0.213	5.99949	0.919491	0.00126082	0.00173797	0.00473676	0.215	5.95982
6930.85	11.78	0.348	0.01	5.03	0.1	0.213	5.99949	0.969491	0.00126082	0.00173161	0.00472403	0.215	5.95982
6931.83	11.78	0.348	0.009	4.98	0.1	0.213	5.99949	1.01949	0.00126082	0.00172524	0.0047113	0.215	5.95982
6932.81	11.78	0.348	0.008	4.93	0.1	0.213	5.99949	1.06949	0.00126082	0.00171887	0.00469857	0.215	5.95982
6933.8	11.78	0.348	0.007	4.88	0.1	0.213	5.99949	1.11949	0.00126082	0.00171251	0.00468583	0.215	5.95982
6934.79	11.78	0.348	0.006	4.83	0.1	0.213	5.99949	1.16949	0.00126082	0.00170614	0.0046731	0.215	5.95982
6935.77	11.78	0.348	0.006	4.78	0.1	0.213	5.99949	1.21949	0.00126082	0.00170614	0.0046731	0.215	5.95982
6936.76	11.78	0.348	0.005	4.74	0.1	0.213	5.99949	1.25949	0.00126082	0.00169977	0.00466037	0.215	5.95982
6937.85	11.78	0.348	0.004	4.68	0.1	0.213	5.99949	1.31949	0.00126082	0.00169341	0.00464764	0.215	5.95982
6938.83	11.78	0.348	0.003	4.63	0.1	0.213	5.99949	1.36949	0.00126082	0.00168704	0.00463491	0.215	5.95982
6939.81	11.78	0.348	0.002	4.585	0.1	0.213	5.99949	1.41449	0.00126082	0.00168068	0.00462217	0.215	5.95982
6940.8	11.78	0.348	0.001	4.53	0.1	0.213	5.99949	1.46949	0.00126082	0.00167431	0.00460944	0.215	5.95982
6941.78	11.78	0.348	0	4.48	0.1	0.213	5.99949	1.51949	0.00126082	0.00166794	0.00459671	0.215	5.95982
6942.77	11.78	0.348	-0.001	4.43	0.1	0.213	5.99949	1.56949	0.00126082	0.00166158	0.00458398	0.215	5.95982
6943.76	11.78	0.348	-0.002	4.385	0.1	0.213	5.99949	1.61449	0.00126082	0.00165521	0.00457124	0.215	5.95982
6944.84	11.78	0.348	-0.003	4.335	0.1	0.213	5.99949	1.66449	0.00126082	0.00164885	0.00455851	0.215	5.95982
6945.83	11.78	0.348	-0.004	4.28	0.1	0.213	5.99949	1.71949	0.00126082	0.00164248	0.00454578	0.215	5.95982
6946.81	11.78	0.348	-0.005	4.235	0.1	0.213	5.99949	1.76449	0.00126082	0.00163611	0.00453305	0.215	5.95982
6947.8	11.78	0.348	-0.006	4.18	0.1	0.213	5.99949	1.81949	0.00126082	0.00162975	0.00452031	0.215	5.95982
6948.78	11.78	0.348	-0.007	4.135	0.1	0.213	5.99949	1.86449	0.00126082	0.00162338	0.00450758	0.215	5.95982
6949.77	11.78	0.348	-0.008	4.08	0.1	0.213	5.99949	1.91949	0.00126082	0.00161701	0.00449485	0.215	5.95982
6950.75	11.78	0.348	-0.009	4.04	0.1	0.213	5.99949	1.95949	0.00126082	0.00161065	0.00448212	0.215	5.95982
6951.85	11.78	0.348	-0.01	3.985	0.1	0.213	5.99949	2.01449	0.00126082	0.00160428	0.00446938	0.215	5.95982
6952.83	11.78	0.348	-0.011	3.935	0.1	0.213	5.99949	2.06449	0.00126082	0.00159792	0.00445665	0.215	5.95982
6953.81	11.78	0.348	-0.012	3.88	0.1	0.213	5.99949	2.11949	0.00126082	0.00159155	0.00444392	0.215	5.95982
6954.8	11.78	0.348	-0.013	3.835	0.1	0.213	5.99949	2.16449	0.00126082	0.00158518	0.00443119	0.215	5.95982
6955.79	11.78	0.348	-0.014	3.78	0.1	0.213	5.99949	2.21949	0.00126082	0.00157882	0.00441845	0.215	5.95982
6956.77	11.78	0.348	-0.015	3.735	0.1	0.213	5.99949	2.26449	0.00126082	0.00157245	0.00440572	0.22	6.09842
6957.75	11.78	0.348	-0.016	3.69	0.1	0.213	5.99949	2.30949	0.00126082	0.00156608	0.00439299	0.22	6.09842
6958.84	11.78	0.348	-0.017	3.635	0.1	0.213	5.99949	2.36449	0.00126082	0.00155972	0.00438026	0.22	6.09842
6959.83	11.78	0.348	-0.019	3.58	0.1	0.213	5.99949	2.41949	0.00126082	0.00154699	0.00435479	0.22	6.09842
6960.81	11.78	0.348	-0.02	3.53	0.1	0.213	5.99949	2.46949	0.00126082	0.00154062	0.00434206	0.22	6.09842
6961.8	11.78	0.348	-0.021	3.485	0.1	0.213	5.99949	2.51449	0.00126082	0.00153425	0.00432933	0.22	6.09842
6962.78	11.78	0.348	-0.022	3.43	0.1	0.213	5.99949	2.56949	0.00126082	0.00152789	0.0043166	0.22	6.09842
6963.77	11.78	0.348	-0.023	3.38	0.1	0.213	5.99949	2.61949	0.00126082	0.00152152	0.00430386	0.22	6.09842
6964.75	11.78	0.348	-0.024	3.33	0.1	0.213	5.99949	2.66949	0.00126082	0.00151516	0.00429113	0.22	6.09842
6965.85	11.78	0.348	-0.026	3.28	0.1	0.213	5.99949	2.71949	0.00126082	0.00150242	0.00426567	0.22	6.09842
6966.83	11.78	0.348	-0.027	3.235	0.1	0.213	5.99949	2.76449	0.00126082	0.00149606	0.00425293	0.22	6.09842
6967.81	11.78	0.348	-0.028	3.18	0.1	0.213	5.99949	2.81949	0.00126082	0.00148969	0.0042402	0.22	6.09842
6968.8	11.78	0.348	-0.029	3.135	0.1	0.213	5.99949	2.86449	0.00126082	0.00148332	0.00422747	0.225	6.23702
6969.78	11.78	0.348	-0.031	3.08	0.1	0.213	5.99949	2.91949	0.00126082	0.00147059	0.004202	0.22	6.09842
6970.77	11.78	0.348	-0.032	3.035	0.1	0.213	5.99949	2.96449	0.00126082	0.00146423	0.00418927	0.225	6.23702
6971.76	11.78	0.348	-0.033	2.99	0.1	0.213	5.99949	3.00949	0.00126082	0.00145786	0.00417654	0.225	6.23702
6972.85	11.78	0.348	-0.034	2.93	0.1	0.213	5.99949	3.06949	0.00126082	0.00145149	0.00416381	0.225	6.23702
6973.83	11.78	0.348	-0.036	2.875	0.1	0.213	5.99949	3.12449	0.00126082	0.00143876	0.00413834	0.225	6.23702
6974.81	11.78	0.348	-0.037	2.83	0.1	0.213	5.99949	3.16949	0.00126082	0.00143239	0.00412561	0.225	6.23702
6975.8	11.78	0.348	-0.038	2.785	0.1	0.213	5.99949	3.21449	0.00126082	0.00142603	0.00411288	0.225	6.23702
6976.78	11.78	0.348	-0.039	2.735	0.1	0.213	5.99949	3.26449	0.00126082	0.00141966	0.00410014	0.225	6.23702
6977.77	11.78	0.348	-0.04	2.685	0.1	0.213	5.99949	3.31449	0.00126082	0.0014133	0.00408741	0.225	6.23702
6978.76	11.78	0.348	-0.041	2.64	0.1	0.213	5.99949	3.35949	0.00126082	0.00140693	0.00407468	0.23	6.37562
6979.84	11.78	0.348	-0.043	2.58	0.1	0.213	5.99949	3.41949	0.00126082	0.0013942	0.00404922	0.23	6.37562
6980.83	11.78	0.348	-0.044	2.53	0.1	0.213	5.99949	3.46949	0.00126082	0.00138783	0.00403648	0.23	6.37562
6981.81	11.78	0.348	-0.045	2.49	0.1	0.213	5.99949	3.50949	0.00126082	0.00138146	0.00402375	0.23	6.37562
6982.8	11.78	0.348	-0.046	2.445	0.1	0.213	5.99949	3.55449	0.00126082	0.0013751	0.00401102	0.23	6.37562
6983.78	11.78	0.348	-0.048	2.395	0.1	0.213	5.99949	3.60449	0.00126082	0.00136237	0.00398555	0.23	6.37562
6984.77	11.78	0.348	-0.05	2.34	0.1	0.213	5.99949	3.65949	0.00126082	0.00134963	0.00396009	0.23	6.37562
6985.75	11.78	0.348	-0.052	2.29	0.1	0.213	5.99949	3.70949	0.00126082	0.0013369	0.00393462	0.23	6.37562
6986.85	11.78	0.348	-0.055	2.235	0.1	0.213	5.99949	3.76449	0.00126082	0.0013178	0.00389643	0.23	6.37562
6987.83	11.78	0.348	-0.057	2.18	0.1	0.213	5.99949	3.81949	0.00126082	0.00130507	0.00387096	0.235	6.51422
6988.81	11.78	0.348	-0.059	2.155	0.1	0.213	5.99949	3.84449	0.00126082	0.00129234	0.0038455	0.235	6.51422
6989.8	11.78	0.348	-0.06	2.2	0.1	0.213	5.99949	3.79949	0.00126082	0.00128597	0.00383276	0.235	6.51422
6990.78	11.78	0.35	-0.059	2.195	0.1	0.213	5.99949	3.80449	0.00127964	0.00129234	0.00386431	0.235	6.51422
6991.77	11.78	0.35	-0.059	2.235	0.1	0.213	5.99949	3.76449	0.00127964	0.00129234	0.00386431	0.235	6.51422
6992.75	11.78	0.348	-0.059	2.245	0.1	0.213	5.99949	3.75449	0.00126082	0.00129234	0.0038455	0.24	6.65282
6993.85	11.78	0.35	-0.059	2.225	0.1	0.213	5.99949	3.77449	0.00127964	0.00129234	0.00386431	0.235	6.51422
6994.83	11.78	0.348	-0.059	2.195	0.1	0.213	5.99949	3.80449	0.00126082	0.00129234	0.0038455	0.24	6.65282
6995.81	11.78	0.35	-0.06	2.165	0.1	0.213	5.99949	3.83449	0.00127964	0.00128597	0.00385158	0.24	6.65282
6996.8	11.78	0.35	-0.06	2.145	0.1	0.213	5.99949	3.85449	0.00127964	0.00128597	0.00385158	0.24	6.65282
6997.78	11.78	0.35	-0.061	2.125	0.1	0.213	5.99949	3.87449	0.00127964	0.00127961	0.00383885	0.24	6.65282
6998.77	11.78	0.35	-0.062	2.11	0.1	0.213	5.99949	3.88949	0.00127964	0.00127324	0.00382612	0.24	6.65282
6999.75	11.8	0.35	-0.062	2.1	0.1	0.213	6.00968	3.90968	0.00127964	0.00127324	0.00382612	0.24	6.65282
7000.85	11.8	0.35	-0.063	2.09	0.1	0.213	6.00968	3.91968	0.00127964	0.00126687	0.00381339	0.24	6.65282
7001.83	11.78	0.35	-0.063	2.075	0.1	0.213	5.99949	3.92449	0.00127964	0.00126687	0.00381339	0.24	6.65282
7002.81	11.78	0.35	-0.064	2.07	0.1	0.213	5.99949	3.92949	0.00127964	0.00126051	0.00380065	0.24	6.65282
7003.8	11.78	0.35	-0.064	2.065	0.1	0.213	5.99949	3.93449	0.00127964	0.00126051	0.00380065	0.24	6.65282
7004.78	11.78	0.35	-0.064	2.06	0.1	0.213	5.99949	3.93949	0.00127964	0.00126051	0.00380065	0.24	6.65282
7005.77	11.78	0.348	-0.065	2.055	0.1	0.213	5.99949	3.94449	0.00126082	0.00125414	0.0037691	0.24	6.65282
7006.75	11.78	0.35	-0.065	2.045	0.1	0.213	5.99949	3.95449	0.00127964	0.00125414	0.00378792	0.24	6.65282
7007.85	11.78	0.35	-0.065	2.04	0.1	0.213	5.99949	3.95949	0.00127964	0.00125414	0.00378792	0.245	6.79142
7008.83	11.78	0.35	-0.066	2.035	0.1	0.213	5.99949	3.96449	0.00127964	0.00124777	0.00377519	0.24	6.65282
7009.81	11.78	0.35	-0.066	2.03	0.1	0.213	5.99949	3.96949	0.00127964	0.00124777	0.00377519	0.245	6.79142
7010.8	11.78	0.35	-0.066	2.025	0.1	0.213	5.99949	3.97449	0.00127964	0.00124777	0.00377519	0.245	6.79142
7011.79	11.78	0.35	-0.066	2.02	0.1	0.213	5.99949	3.97949	0.00127964	0.00124777	0.00377519	0.245	6.79142
7012.77	11.78	0.35	-0.067	2.015	0.1	0.213	5.99949	3.98449	0.00127964	0.00124141	0.00376246	0.245	6.79142
7013.76	11.78	0.35	-0.067	2.015	0.1	0.213	5.99949	3.98449	0.00127964	0.00124141	0.00376246	0.245	6.79142
7014.85	11.78	0.35	-0.067	2.01	0.1	0.213	5.99949	3.98949	0.00127964	0.00124141	0.00376246	0.245	6.79142
7015.83	11.78	0.35	-0.067	2.005	0.1	0.213	5.99949	3.99449	0.00127964	0.00124141	0.00376246	0.245	6.79142
7016.81	11.78	0.35	-0.067	2.005	0.1	0.213	5.99949	3.99449	0.00127964	0.00124141	0.00376246	0.245	6.79142
7017.8	11.78	0.35	-0.067	2.005	0.1	0.213	5.99949	3.99449	0.00127964	0.00124141	0.00376246	0.245	6.79142
7018.79	11.78	0.35	-0.068	2.005	0.1	0.213	5.99949	3.99449	0.00127964	0.00123504	0.00374972	0.245	6.79142
7019.77	11.78	0.35	-0.068	2	0.1	0.213	5.99949	3.99949	0.00127964	0.00123504	0.00374972	0.245	6.79142
7020.75	11.78	0.35	-0.068	2	0.1	0.213	5.99949	3.99949	0.00127964	0.00123504	0.00374972	0.245	6.79142
7021.85	11.78	0.35	-0.068	2	0.1	0.213	5.99949	3.99949	0.00127964	0.00123504	0.00374972	0.245	6.79142
7022.83	11.78	0.35	-0.068	2	0.1	0.213	5.99949	3.99949	0.00127964	0.00123504	0.00374972	0.245	6.79142
7023.81	11.78	0.35	-0.068	2	0.1	0.213	5.99949	3.99949	0.00127964	0.00123504	0.00374972	0.245	6.79142
7024.8	11.78	0.35	-0.068	2	0.1	0.213	5.99949	3.99949	0.00127964	0.00123504	0.00374972	0.245	6.79142
7025.79	11.76	0.35	-0.068	2	0.1	0.213	5.9893	3.9893	0.00127964	0.00123504	0.00374972	0.245	6.79142
7026.77	11.76	0.35	-0.068	2	0.1	0.213	5.9893	3.9893	0.00127964	0.00123504	0.00374972	0.245	6.79142
7027.75	11.74	0.35	-0.068	2	0.1	0.213	5.97912	3.97912	0.00127964	0.00123504	0.00374972	0.245	6.79142
7028.84	11.76	0.35	-0.068	2	0.1	0.213	5.9893	3.9893	0.00127964	0.00123504	0.00374972	0.245	6.79142
7029.83	11.76	0.35	-0.068	2	0.1	0.213	5.9893	3.9893	0.00127964	0.00123504	0.00374972	0.245	6.79142
7030.81	11.76	0.35	-0.068	2	0.1	0.213	5.9893	3.9893	0.00127964	0.00123504	0.00374972	0.245	6.79142
7031.8	11.76	0.35	-0.068	2	0.1	0.213	5.9893	3.9893	0.00127964	0.00123504	0.00374972	0.245	6.79142
7032.78	11.76	0.35	-0.068	2	0.1	0.213	5.9893	3.9893	0.00127964	0.00123504	0.00374972	0.245	6.79142
7033.77	11.76	0.35	-0.068	2	0.1	0.213	5.9893	3.9893	0.00127964	0.00123504	0.00374972	0.245	6.79142
7034.75	11.78	0.35	-0.068	2	0.1	0.213	5.99949	3.99949	0.00127964	0.00123504	0.00374972	0.245	6.79142
7035.85	11.78	0.35	-0.068	2	0.1	0.213	5.99949	3.99949	0.00127964	0.00123504	0.00374972	0.245	6.79142
7036.83	11.78	0.35	-0.068	2	0.1	0.213	5.99949	3.99949	0.00127964	0.00123504	0.00374972	0.245	6.79142
7037.81	11.78	0.35	-0.068	2	0.1	0.213	5.99949	3.99949	0.00127964	0.00123504	0.00374972	0.245	6.79142
7038.8	11.78	0.35	-0.068	2	0.1	0.213	5.99949	3.99949	0.00127964	0.00123504	0.00374972	0.245	6.79142
7039.78	11.78	0.35	-0.068	2	0.1	0.213	5.99949	3.99949	0.00127964	0.00123504	0.00374972	0.245	6.79142
7040.77	11.78	0.35	-0.068	2	0.1	0.213	5.99949	3.99949	0.00127964	0.00123504	0.00374972	0.245	6.79142
7041.76	11.78	0.35	-0.068	2	0.1	0.213	5.99949	3.99949	0.00127964	0.00123504	0.00374972	0.245	6.79142
7042.84	11.78	0.35	-0.068	2	0.1	0.213	5.99949	3.99949	0.00127964	0.00123504	0.00374972	0.245	6.79142
7043.83	11.78	0.35	-0.068	2	0.1	0.213	5.99949	3.99949	0.00127964	0.00123504	0.00374972	0.245	6.79142
7044.81	11.78	0.35	-0.068	2	0.1	0.213	5.99949	3.99949	0.00127964	0.00123504	0.00374972	0.245	6.79142
7045.8	11.78	0.35	-0.068	2	0.1	0.213	5.99949	3.99949	0.00127964	0.00123504	0.00374972	0.245	6.79142
7046.78	11.78	0.35	-0.068	2	0.1	0.213	5.99949	3.99949	0.00127964	0.00123504	0.00374972	0.245	6.79142
7047.77	11.8	0.35	-0.068	2	0.1	0.213	6.00968	4.00968	0.00127964	0.00123504	0.00374972	0.245	6.79142
7048.76	11.8	0.35	-0.068	2	0.1	0.213	6.00968	4.00968	0.00127964	0.00123504	0.00374972	0.245	6.79142
7049.85	11.8	0.35	-0.068	2	0.1	0.213	6.00968	4.00968	0.00127964	0.00123504	0.00374972	0.245	6.79142
7050.83	11.8	0.35	-0.068	2	0.1	0.213	6.00968	4.00968	0.00127964	0.00123504	0.00374972	0.245	6.79142
7051.81	11.8	0.35	-0.068	2	0.1	0.213	6.00968	4.00968	0.00127964	0.00123504	0.00374972	0.245	6.79142
7052.8	11.8	0.35	-0.068	2	0.1	0.213	6.00968	4.00968	0.00127964	0.00123504	0.00374972	0.245	6.79142
7053.79	11.78	0.35	-0.068	2	0.1	0.213	5.99949	3.99949	0.00127964	0.00123504	0.00374972	0.245	6.79142
7054.77	11.8	0.35	-0.068	2	0.1	0.213	6.00968	4.00968	0.00127964	0.00123504	0.00374972	0.245	6.79142
7055.75	11.78	0.35	-0.068	2	0.1	0.213	5.99949	3.99949	0.00127964	0.00123504	0.00374972	0.245	6.79142
7056.85	11.78	0.35	-0.068	2	0.1	0.213	5.99949	3.99949	0.00127964	0.00123504	0.00374972	0.245	6.79142
7057.83	11.78	0.35	-0.068	2	0.1	0.213	5.99949	3.99949	0.00127964	0.00123504	0.00374972	0.245	6.79142
7058.81	11.78	0.35	-0.068	2	0.1	0.213	5.99949	3.99949	0.00127964	0.00123504	0.00374972	0.245	6.79142
7059.8	11.78	0.35	-0.068	2	0.1	0.213	5.99949	3.99949	0.00127964	0.00123504	0.00374972	0.245	6.79142
7060.78	11.78	0.35	-0.068	2	0.1	0.213	5.99949	3.99949	0.00127964	0.00123504	0.00374972	0.245	6.79142
7061.77	11.78	0.35	-0.068	2	0.1	0.213	5.99949	3.99949	0.00127964	0.00123504	0.00374972	0.245	6.79142
7062.76	11.78	0.35	-0.068	2	0.1	0.213	5.99949	3.99949	0.00127964	0.00123504	0.00374972	0.245	6.79142
7063.85	11.78	0.35	-0.068	2	0.1	0.213	5.99949	3.99949	0.00127964	0.00123504	0.00374972	0.245	6.79142
7064.83	11.78	0.35	-0.068	2	0.1	0.213	5.99949	3.99949	0.00127964	0.00123504	0.00374972	0.245	6.79142
7065.81	11.78	0.35	-0.068	2	0.1	0.213	5.99949	3.99949	0.00127964	0.00123504	0.00374972	0.245	6.79142
7066.8	11.78	0.35	-0.068	2	0.1	0.213	5.99949	3.99949	0.00127964	0.00123504	0.00374972	0.245	6.79142
7067.78	11.78	0.35	-0.068	2	0.1	0.213	5.99949	3.99949	0.00127964	0.00123504	0.00374972	0.245	6.79142
7068.77	11.78	0.35	-0.068	2	0.1	0.213	5.99949	3.99949	0.00127964	0.00123504	0.00374972	0.245	6.79142
7069.75	11.78	0.35	-0.068	2	0.1	0.213	5.99949	3.99949	0.00127964	0.00123504	0.00374972	0.245	6.79142
7070.84	11.78	0.351	-0.068	2	0.1	0.213	5.99949	3.99949	0.00128905	0.00123504	0.00375913	0.245	6.79142
7071.83	11.78	0.35	-0.068	2	0.1	0.213	5.99949	3.99949	0.00127964	0.00123504	0.00374972	0.245	6.79142
7072.81	11.78	0.35	-0.068	2	0.1	0.213	5.99949	3.99949	0.00127964	0.00123504	0.00374972	0.245	6.79142
7073.8	11.78	0.35	-0.068	2	0.1	0.213	5.99949	3.99949	0.00127964	0.00123504	0.00374972	0.245	6.79142
7074.79	11.78	0.35	-0.068	2	0.1	0.213	5.99949	3.99949	0.00127964	0.00123504	0.00374972	0.245	6.79142
7075.77	11.78	0.35	-0.068	2	0.1	0.213	5.99949	3.99949	0.00127964	0.00123504	0.00374972	0.245	6.79142
7076.75	11.78	0.35	-0.068	2	0.1	0.213	5.99949	3.99949	0.00127964	0.00123504	0.00374972	0.245	6.79142
7077.85	11.78	0.351	-0.068	2	0.1	0.213	5.99949	3.99949	0.00128905	0.00123504	0.00375913	0.245	6.79142
7078.83	11.78	0.35	-0.068	2	0.1	0.213	5.99949	3.99949	0.00127964	0.00123504	0.00374972	0.245	6.79142
7079.81	11.78	0.35	-0.068	2	0.1	0.213	5.99949	3.99949	0.00127964	0.00123504	0.00374972	0.245	6.79142
7080.8	11.78	0.35	-0.068	2	0.1	0.213	5.99949	3.99949	0.00127964	0.00123504	0.00374972	0.245	6.79142
7081.78	11.78	0.35	-0.068	2	0.1	0.213	5.99949	3.99949	0.00127964	0.00123504	0.00374972	0.245	6.79142
7082.77	11.78	0.351	-0.068	2	0.1	0.213	5.99949	3.99949	0.00128905	0.00123504	0.00375913	0.245	6.79142
7083.75	11.78	0.35	-0.068	2	0.1	0.213	5.99949	3.99949	0.00127964	0.00123504	0.00374972	0.245	6.79142
7084.84	11.78	0.351	-0.068	2	0.1	0.213	5.99949	3.99949	0.00128905	0.00123504	0.00375913	0.245	6.79142
7085.83	11.78	0.351	-0.068	2	0.1	0.213	5.99949	3.99949	0.00128905	0.00123504	0.00375913	0.245	6.79142
7086.81	11.78	0.35	-0.068	2	0.1	0.213	5.99949	3.99949	0.00127964	0.00123504	0.00374972	0.245	6.79142
7087.8	11.78	0.351	-0.068	2	0.1	0.213	5.99949	3.99949	0.00128905	0.00123504	0.00375913	0.245	6.79142
7088.79	11.78	0.35	-0.068	2	0.1	0.213	5.99949	3.99949	0.00127964	0.00123504	0.00374972	0.245	6.79142
7089.77	11.78	0.35	-0.068	2	0.1	0.213	5.99949	3.99949	0.00127964	0.00123504	0.00374972	0.245	6.79142
7090.76	11.78	0.35	-0.068	2	0.1	0.213	5.99949	3.99949	0.00127964	0.00123504	0.00374972	0.245	6.79142
7091.85	11.78	0.351	-0.068	2	0.1	0.213	5.99949	3.99949	0.00128905	0.00123504	0.00375913	0.245	6.79142
7092.83	11.78	0.35	-0.068	2	0.1	0.213	5.99949	3.99949	0.00127964	0.00123504	0.00374972	0.245	6.79142
7093.81	11.78	0.35	-0.068	2	0.1	0.213	5.99949	3.99949	0.00127964	0.00123504	0.00374972	0.245	6.79142
7094.8	11.78	0.351	-0.068	2	0.1	0.213	5.99949	3.99949	0.00128905	0.00123504	0.00375913	0.245	6.79142
7095.79	11.78	0.35	-0.068	2	0.1	0.213	5.99949	3.99949	0.00127964	0.00123504	0.00374972	0.245	6.79142
7096.77	11.78	0.351	-0.068	2	0.1	0.213	5.99949	3.99949	0.00128905	0.00123504	0.00375913	0.245	6.79142
7097.75	11.78	0.351	-0.068	2	0.1	0.213	5.99949	3.99949	0.00128905	0.00123504	0.00375913	0.245	6.79142
7098.85	11.78	0.35	-0.068	2	0.1	0.213	5.99949	3.99949	0.00127964	0.00123504	0.00374972	0.245	6.79142
7099.83	11.78	0.35	-0.068	2	0.1	0.213	5.99949	3.99949	0.00127964	0.00123504	0.00374972	0.245	6.79142
7100.81	11.78	0.35	-0.068	2	0.1	0.213	5.99949	3.99949	0.00127964	0.00123504	0.00374972	0.245	6.79142
7101.8	11.78	0.35	-0.068	2	0.1	0.213	5.99949	3.99949	0.00127964	0.00123504	0.00374972	0.245	6.79142
7102.78	11.78	0.351	-0.068	2	0.1	0.213	5.99949	3.99949	0.00128905	0.00123504	0.00375913	0.245	6.79142
7103.77	11.78	0.351	-0.068	2	0.1	0.213	5.99949	3.99949	0.00128905	0.00123504	0.00375913	0.245	6.79142
7104.76	11.78	0.35	-0.068	2	0.1	0.213	5.99949	3.99949	0.00127964	0.00123504	0.00374972	0.245	6.79142
7105.85	11.78	0.35	-0.068	2	0.1	0.213	5.99949	3.99949	0.00127964	0.00123504	0.00374972	0.245	6.79142
7106.83	11.78	0.351	-0.068	2	0.1	0.213	5.99949	3.99949	0.00128905	0.00123504	0.00375913	0.245	6.79142
7107.81	11.78	0.35	-0.068	2	0.1	0.213	5.99949	3.99949	0.00127964	0.00123504	0.00374972	0.245	6.79142
7108.8	11.78	0.351	-0.068	2	0.1	0.213	5.99949	3.99949	0.00128905	0.00123504	0.00375913	0.245	6.79142
7109.78	11.78	0.351	-0.068	2	0.1	0.213	5.99949	3.99949	0.00128905	0.00123504	0.00375913	0.245	6.79142
7110.77	11.78	0.351	-0.068	2	0.1	0.213	5.99949	3.99949	0.00128905	0.00123504	0.00375913	0.245	6.79142
7111.75	11.78	0.351	-0.068	2	0.1	0.213	5.99949	3.99949	0.00128905	0.00123504	0.00375913	0.245	6.79142
7112.85	11.78	0.351	-0.068	2	0.1	0.213	5.99949	3.99949	0.00128905	0.00123504	0.00375913	0.245	6.79142
7113.83	11.78	0.351	-0.068	2	0.1	0.213	5.99949	3.99949	0.00128905	0.00123504	0.00375913	0.245	6.79142
7114.81	11.78	0.351	-0.068	2	0.1	0.213	5.99949	3.99949	0.00128905	0.00123504	0.00375913	0.245	6.79142
7115.8	11.78	0.351	-0.068	2	0.1	0.213	5.99949	3.99949	0.00128905	0.00123504	0.00375913	0.25	6.93002
7116.78	11.78	0.351	-0.068	2	0.1	0.213	5.99949	3.99949	0.00128905	0.00123504	0.00375913	0.245	6.79142
7117.77	11.78	0.351	-0.068	2	0.1	0.213	5.99949	3.99949	0.00128905	0.00123504	0.00375913	0.25	6.93002
7118.76	11.78	0.351	-0.068	2	0.1	0.213	5.99949	3.99949	0.00128905	0.00123504	0.00375913	0.25	6.93002
7119.84	11.78	0.351	-0.068	2	0.1	0.213	5.99949	3.99949	0.00128905	0.00123504	0.00375913	0.245	6.79142
7120.83	11.78	0.351	-0.068	2	0.1	0.213	5.99949	3.99949	0.00128905	0.00123504	0.00375913	0.245	6.79142
7121.81	11.78	0.351	-0.068	2	0.1	0.213	5.99949	3.99949	0.00128905	0.00123504	0.00375913	0.245	6.79142
7122.8	11.78	0.351	-0.068	2	0.1	0.213	5.99949	3.99949	0.00128905	0.00123504	0.00375913	0.245	6.79142
7123.78	11.78	0.351	-0.068	2	0.1	0.213	5.99949	3.99949	0.00128905	0.00123504	0.00375913	0.245	6.79142
7124.77	11.78	0.351	-0.068	2	0.1	0.213	5.99949	3.99949	0.00128905	0.00123504	0.00375913	0.245	6.79142
7125.75	11.78	0.351	-0.068	2	0.1	0.213	5.99949	3.99949	0.00128905	0.00123504	0.00375913	0.245	6.79142
7126.84	11.78	0.351	-0.068	2	0.1	0.213	5.99949	3.99949	0.00128905	0.00123504	0.00375913	0.245	6.79142
7127.83	11.78	0.351	-0.068	2	0.1	0.213	5.99949	3.99949	0.00128905	0.00123504	0.00375913	0.245	6.79142
7128.81	11.78	0.351	-0.068	2	0.1	0.213	5.99949	3.99949	0.00128905	0.00123504	0.00375913	0.245	6.79142
7129.8	11.78	0.351	-0.068	2	0.1	0.213	5.99949	3.99949	0.00128905	0.00123504	0.00375913	0.245	6.79142
7130.78	11.78	0.351	-0.068	2	0.1	0.213	5.99949	3.99949	0.00128905	0.00123504	0.00375913	0.245	6.79142
7131.77	11.78	0.351	-0.068	2	0.1	0.213	5.99949	3.99949	0.00128905	0.00123504	0.00375913	0.245	6.79142
7132.75	11.78	0.351	-0.068	2	0.1	0.213	5.99949	3.99949	0.00128905	0.00123504	0.00375913	0.245	6.79142
7133.84	11.78	0.351	-0.068	2	0.1	0.213	5.99949	3.99949	0.00128905	0.00123504	0.00375913	0.245	6.79142
7134.83	11.78	0.351	-0.068	2	0.1	0.213	5.99949	3.99949	0.00128905	0.00123504	0.00375913	0.245	6.79142
7135.81	11.78	0.351	-0.068	2	0.1	0.213	5.99949	3.99949	0.00128905	0.00123504	0.00375913	0.245	6.79142
7136.8	11.78	0.351	-0.068	2	0.1	0.213	5.99949	3.99949	0.00128905	0.00123504	0.00375913	0.245	6.79142
7137.78	11.76	0.351	-0.068	2	0.1	0.213	5.9893	3.9893	0.00128905	0.00123504	0.00375913	0.245	6.79142
7138.77	11.78	0.351	-0.068	2	0.1	0.213	5.99949	3.99949	0.00128905	0.00123504	0.00375913	0.245	6.79142
7139.75	11.78	0.351	-0.068	2	0.1	0.213	5.99949	3.99949	0.00128905	0.00123504	0.00375913	0.245	6.79142
7140.84	11.8	0.351	-0.068	2	0.1	0.213	6.00968	4.00968	0.00128905	0.00123504	0.00375913	0.245	6.79142
7141.83	11.84	0.353	-0.068	2	0.1	0.213	6.03005	4.03005	0.00130787	0.00123504	0.00377795	0.245	6.79142
7142.81	11.92	0.353	-0.068	2	0.1	0.213	6.07079	4.07079	0.00130787	0.00123504	0.00377795	0.245	6.79142
7143.8	11.92	0.353	-0.068	2	0.1	0.213	6.07079	4.07079	0.00130787	0.00123504	0.00377795	0.245	6.79142
7144.78	12.02	0.353	-0.068	2	0.1	0.213	6.12172	4.12172	0.00130787	0.00123504	0.00377795	0.245	6.79142
7145.77	12.02	0.353	-0.068	2	0.1	0.213	6.12172	4.12172	0.00130787	0.00123504	0.00377795	0.245	6.79142
7146.76	12.1	0.355	-0.068	2	0.1	0.213	6.16246	4.16246	0.00132668	0.00123504	0.00379677	0.245	6.79142
7147.84	12.14	0.355	-0.068	2	0.1	0.213	6.18284	4.18284	0.00132668	0.00123504	0.00379677	0.245	6.79142
7148.83	12.22	0.356	-0.068	2	0.1	0.213	6.22358	4.22358	0.00133609	0.00123504	0.00380618	0.245	6.79142
7149.81	12.24	0.356	-0.068	2	0.1	0.213	6.23377	4.23377	0.00133609	0.00123504	0.00380618	0.245	6.79142
7150.8	12.32	0.356	-0.068	2	0.1	0.213	6.27451	4.27451	0.00133609	0.00123504	0.00380618	0.245	6.79142
7151.79	12.34	0.358	-0.068	2	0.1	0.213	6.2847	4.2847	0.00135491	0.00123504	0.003825	0.245	6.79142
7152.77	12.42	0.358	-0.068	2	0.1	0.213	6.32544	4.32544	0.00135491	0.00123504	0.003825	0.245	6.79142
7153.76	12.44	0.358	-0.068	2	0.1	0.213	6.33563	4.33563	0.00135491	0.00123504	0.003825	0.245	6.79142
7154.85	12.52	0.36	-0.069	2	0.1	0.213	6.37637	4.37637	0.00137373	0.00122868	0.00383108	0.245	6.79142
7155.83	12.54	0.361	-0.069	2	0.1	0.213	6.38655	4.38655	0.00138314	0.00122868	0.00384049	0.245	6.79142
7156.81	12.62	0.361	-0.069	2	0.1	0.213	6.4273	4.4273	0.00138314	0.00122868	0.00384049	0.245	6.79142
7157.8	12.6	0.361	-0.069	2	0.1	0.213	6.41711	4.41711	0.00138314	0.00122868	0.00384049	0.245	6.79142
7158.79	12.7	0.363	-0.069	2	0.1	0.213	6.46804	4.46804	0.00140196	0.00122868	0.00385931	0.245	6.79142
7159.77	12.74	0.363	-0.069	2	0.1	0.213	6.48841	4.48841	0.00140196	0.00122868	0.00385931	0.245	6.79142
7160.75	12.82	0.365	-0.069	2	0.1	0.213	6.52916	4.52916	0.00142078	0.00122868	0.00387813	0.245	6.79142
7161.84	12.86	0.365	-0.069	2	0.1	0.213	6.54953	4.54953	0.00142078	0.00122868	0.00387813	0.245	6.79142
7162.83	12.92	0.366	-0.069	2	0.1	0.213	6.58009	4.58009	0.00143018	0.00122868	0.00388754	0.245	6.79142
7163.81	12.94	0.368	-0.069	2	0.1	0.213	6.59027	4.59027	0.001449	0.00122868	0.00390635	0.245	6.79142
7164.8	13.04	0.368	-0.069	2	0.1	0.213	6.6412	4.6412	0.001449	0.00122868	0.00390635	0.245	6.79142
7165.78	13.06	0.368	-0.069	2	0.1	0.213	6.65139	4.65139	0.001449	0.00122868	0.00390635	0.245	6.79142
7166.77	13.12	0.37	-0.069	2	0.1	0.213	6.68195	4.68195	0.00146782	0.00122868	0.00392517	0.245	6.79142
7167.76	13.16	0.371	-0.07	2	0.1	0.213	6.70232	4.70232	0.00147723	0.00122231	0.00392185	0.245	6.79142
7168.84	13.22	0.371	-0.07	2	0.1	0.213	6.73287	4.73287	0.00147723	0.00122231	0.00392185	0.245	6.79142
7169.83	13.26	0.373	-0.07	2	0.1	0.213	6.75325	4.75325	0.00149605	0.00122231	0.00394067	0.245	6.79142
7170.81	13.32	0.373	-0.07	2	0.1	0.213	6.7838	4.7838	0.00149605	0.00122231	0.00394067	0.245	6.79142
7171.8	13.36	0.375	-0.07	2	0.1	0.213	6.80418	4.80418	0.00151487	0.00122231	0.00395949	0.245	6.79142
7172.78	13.42	0.376	-0.07	2	0.1	0.213	6.83473	4.83473	0.00152428	0.00122231	0.0039689	0.245	6.79142
7173.77	13.46	0.376	-0.07	2	0.1	0.213	6.85511	4.85511	0.00152428	0.00122231	0.0039689	0.245	6.79142
7174.75	13.52	0.378	-0.07	2	0.1	0.213	6.88566	4.88566	0.00154309	0.00122231	0.00398771	0.24	6.65282
7175.84	13.56	0.378	-0.071	2	0.1	0.213	6.90604	4.90604	0.00154309	0.00121594	0.00397498	0.24	6.65282
7176.83	13.62	0.38	-0.071	2	0.1	0.213	6.93659	4.93659	0.00156191	0.00121594	0.0039938	0.24	6.65282
7177.81	13.66	0.38	-0.071	2	0.1	0.213	6.95696	4.95696	0.00156191	0.00121594	0.0039938	0.24	6.65282
7178.8	13.72	0.381	-0.071	2	0.1	0.213	6.98752	4.98752	0.00157132	0.00121594	0.00400321	0.24	6.65282
7179.78	13.76	0.383	-0.071	2	0.1	0.213	7.00789	5.00789	0.00159014	0.00121594	0.00402203	0.24	6.65282
7180.77	13.8	0.383	-0.071	2	0.1	0.213	7.02827	5.02827	0.00159014	0.00121594	0.00402203	0.24	6.65282
7181.75	13.84	0.385	-0.071	2	0.1	0.213	7.04864	5.04864	0.00160896	0.00121594	0.00404085	0.24	6.65282
7182.85	13.9	0.385	-0.072	2	0.1	0.213	7.0792	5.0792	0.00160896	0.00120958	0.00402811	0.24	6.65282
7183.83	13.94	0.386	-0.072	2	0.1	0.213	7.09957	5.09957	0.00161837	0.00120958	0.00403752	0.24	6.65282
7184.81	14	0.386	-0.072	2	0.1	0.213	7.13012	5.13012	0.00161837	0.00120958	0.00403752	0.24	6.65282
7185.8	14.04	0.388	-0.072	2	0.1	0.213	7.1505	5.1505	0.00163718	0.00120958	0.00405634	0.24	6.65282
7186.79	14.1	0.39	-0.072	2	0.1	0.213	7.18105	5.18105	0.001656	0.00120958	0.00407516	0.24	6.65282
7187.77	14.14	0.39	-0.072	2	0.1	0.213	7.20143	5.20143	0.001656	0.00120958	0.00407516	0.24	6.65282
7188.75	14.2	0.391	-0.072	2	0.1	0.213	7.23198	5.23198	0.00166541	0.00120958	0.00408457	0.24	6.65282
7189.84	14.24	0.391	-0.073	2	0.1	0.213	7.25236	5.25236	0.00166541	0.00120321	0.00407183	0.24	6.65282
7190.83	14.32	0.393	-0.073	2	0.1	0.213	7.2931	5.2931	0.00168423	0.00120321	0.00409065	0.24	6.65282
7191.81	14.34	0.393	-0.073	2	0.1	0.213	7.30328	5.30328	0.00168423	0.00120321	0.00409065	0.24	6.65282
7192.8	14.4	0.395	-0.073	2	0.1	0.213	7.33384	5.33384	0.00170305	0.00120321	0.00410947	0.24	6.65282
7193.78	14.44	0.396	-0.073	2	0.1	0.213	7.35421	5.35421	0.00171246	0.00120321	0.00411888	0.24	6.65282
7194.77	14.52	0.396	-0.073	2	0.1	0.213	7.39496	5.39496	0.00171246	0.00120321	0.00411888	0.24	6.65282
7195.76	14.54	0.398	-0.073	2	0.1	0.213	7.40514	5.40514	0.00173128	0.00120321	0.0041377	0.24	6.65282
7196.85	14.6	0.4	-0.074	2	0.1	0.213	7.4357	5.4357	0.00175009	0.00119685	0.00414378	0.24	6.65282
7197.83	14.64	0.4	-0.074	2	0.1	0.213	7.45607	5.45607	0.00175009	0.00119685	0.00414378	0.24	6.65282
7198.81	14.7	0.401	-0.074	2	0.1	0.213	7.48663	5.48663	0.0017595	0.00119685	0.00415319	0.24	6.65282
7199.8	14.74	0.403	-0.074	2	0.1	0.213	7.507	5.507	0.00177832	0.00119685	0.00417201	0.24	6.65282
7200.78	14.8	0.405	-0.074	2	0.1	0.213	7.53756	5.53756	0.00179714	0.00119685	0.00419083	0.235	6.51422
7201.77	14.82	0.406	-0.074	2	0.1	0.213	7.54775	5.54775	0.00180655	0.00119685	0.00420024	0.235	6.51422
7202.75	14.9	0.408	-0.075	2	0.1	0.213	7.58849	5.58849	0.00182537	0.00119048	0.00420632	0.235	6.51422
7203.85	14.94	0.41	-0.075	2	0.1	0.213	7.60886	5.60886	0.00184419	0.00119048	0.00422514	0.235	6.51422
7204.83	15	0.412	-0.075	2	0.1	0.213	7.63942	5.63942	0.001863	0.00119048	0.00424396	0.235	6.51422
7205.81	15.02	0.412	-0.075	2	0.1	0.213	7.64961	5.64961	0.001863	0.00119048	0.00424396	0.235	6.51422
7206.8	15.1	0.413	-0.075	2	0.1	0.213	7.69035	5.69035	0.00187241	0.00119048	0.00425337	0.235	6.51422
7207.79	15.14	0.415	-0.076	2	0.1	0.213	7.71072	5.71072	0.00189123	0.00118411	0.00425946	0.235	6.51422
7208.77	15.2	0.417	-0.076	2	0.1	0.213	7.74128	5.74128	0.00191005	0.00118411	0.00427827	0.235	6.51422
7209.75	15.26	0.418	-0.076	2	0.1	0.213	7.77184	5.77184	0.00191946	0.00118411	0.00428768	0.235	6.51422
7210.84	15.3	0.42	-0.076	2	0.1	0.213	7.79221	5.79221	0.00193828	0.00118411	0.0043065	0.235	6.51422
7211.83	15.34	0.422	-0.076	2	0.1	0.213	7.81258	5.81258	0.00195709	0.00118411	0.00432532	0.235	6.51422
7212.81	15.42	0.423	-0.076	2	0.1	0.213	7.85332	5.85332	0.0019665	0.00118411	0.00433473	0.235	6.51422
7213.8	15.44	0.425	-0.077	2	0.1	0.213	7.86351	5.86351	0.00198532	0.00117775	0.00434081	0.235	6.51422
7214.79	15.5	0.427	-0.077	2	0.1	0.213	7.89407	5.89407	0.00200414	0.00117775	0.00435963	0.235	6.51422
7215.77	15.5	0.427	-0.077	2	0.1	0.213	7.89407	5.89407	0.00200414	0.00117775	0.00435963	0.235	6.51422
7216.76	15.54	0.428	-0.077	2	0.1	0.213	7.91444	5.91444	0.00201355	0.00117775	0.00436904	0.235	6.51422
7217.85	15.52	0.428	-0.077	2	0.1	0.213	7.90425	5.90425	0.00201355	0.00117775	0.00436904	0.235	6.51422
7218.83	15.54	0.428	-0.077	2	0.1	0.213	7.91444	5.91444	0.00201355	0.00117775	0.00436904	0.235	6.51422
7219.81	15.54	0.428	-0.078	2	0.1	0.213	7.91444	5.91444	0.00201355	0.00117138	0.00435631	0.235	6.51422
7220.8	15.56	0.43	-0.078	2	0.1	0.213	7.92462	5.92462	0.00203237	0.00117138	0.00437513	0.235	6.51422
7221.78	15.56	0.43	-0.078	2	0.1	0.213	7.92462	5.92462	0.00203237	0.00117138	0.00437513	0.23	6.37562
7222.77	15.56	0.43	-0.078	2	0.1	0.213	7.92462	5.92462	0.00203237	0.00117138	0.00437513	0.23	6.37562
7223.76	15.56	0.43	-0.078	2	0.1	0.213	7.92462	5.92462	0.00203237	0.00117138	0.00437513	0.23	6.37562
7224.84	15.58	0.43	-0.078	2	0.1	0.213	7.93481	5.93481	0.00203237	0.00117138	0.00437513	0.23	6.37562
7225.83	15.56	0.43	-0.078	2	0.1	0.213	7.92462	5.92462	0.00203237	0.00117138	0.00437513	0.23	6.37562
7226.81	15.58	0.43	-0.078	2	0.1	0.213	7.93481	5.93481	0.00203237	0.00117138	0.00437513	0.23	6.37562
7227.8	15.58	0.432	-0.078	2	0.1	0.213	7.93481	5.93481	0.00205119	0.00117138	0.00439395	0.23	6.37562
7228.79	15.6	0.432	-0.078	2	0.1	0.213	7.945	5.945	0.00205119	0.00117138	0.00439395	0.23	6.37562
7229.77	15.58	0.432	-0.078	2	0.1	0.213	7.93481	5.93481	0.00205119	0.00117138	0.00439395	0.23	6.37562
7230.75	15.6	0.432	-0.078	2	0.1	0.213	7.945	5.945	0.00205119	0.00117138	0.00439395	0.23	6.37562
7231.85	15.6	0.432	-0.078	2	0.1	0.213	7.945	5.945	0.00205119	0.00117138	0.00439395	0.23	6.37562
7232.83	15.6	0.432	-0.078	2	0.1	0.213	7.945	5.945	0.00205119	0.00117138	0.00439395	0.23	6.37562
7233.81	15.6	0.432	-0.078	2	0.1	0.213	7.945	5.945	0.00205119	0.00117138	0.00439395	0.23	6.37562
7234.8	15.62	0.433	-0.078	2	0.1	0.213	7.95518	5.95518	0.00206059	0.00117138	0.00440336	0.23	6.37562
7235.79	15.6	0.433	-0.078	2	0.1	0.213	7.945	5.945	0.00206059	0.00117138	0.00440336	0.23	6.37562
7236.77	15.6	0.432	-0.078	2	0.1	0.213	7.945	5.945	0.00205119	0.00117138	0.00439395	0.23	6.37562
7237.75	15.6	0.432	-0.078	2	0.1	0.213	7.945	5.945	0.00205119	0.00117138	0.00439395	0.23	6.37562
7238.85	15.64	0.433	-0.078	2	0.1	0.213	7.96537	5.96537	0.00206059	0.00117138	0.00440336	0.23	6.37562
7239.83	15.64	0.433	-0.078	2	0.1	0.213	7.96537	5.96537	0.00206059	0.00117138	0.00440336	0.23	6.37562
7240.81	15.64	0.433	-0.078	2	0.1	0.213	7.96537	5.96537	0.00206059	0.00117138	0.00440336	0.23	6.37562
7241.8	15.64	0.433	-0.078	2	0.1	0.213	7.96537	5.96537	0.00206059	0.00117138	0.00440336	0.23	6.37562
7242.78	15.66	0.433	-0.079	2	0.1	0.213	7.97555	5.97555	0.00206059	0.00116501	0.00439062	0.23	6.37562
7243.77	15.66	0.433	-0.079	2	0.1	0.213	7.97555	5.97555	0.00206059	0.00116501	0.00439062	0.23	6.37562
7244.75	15.66	0.433	-0.079	2	0.1	0.213	7.97555	5.97555	0.00206059	0.00116501	0.00439062	0.23	6.37562
7245.85	15.64	0.435	-0.079	2	0.1	0.213	7.96537	5.96537	0.00207941	0.00116501	0.00440944	0.23	6.37562
7246.83	15.66	0.433	-0.079	2	0.1	0.213	7.97555	5.97555	0.00206059	0.00116501	0.00439062	0.23	6.37562
7247.81	15.66	0.433	-0.079	2	0.1	0.213	7.97555	5.97555	0.00206059	0.00116501	0.00439062	0.23	6.37562
7248.8	15.68	0.433	-0.079	2	0.1	0.213	7.98574	5.98574	0.00206059	0.00116501	0.00439062	0.23	6.37562
7249.78	15.66	0.435	-0.079	2	0.1	0.213	7.97555	5.97555	0.00207941	0.00116501	0.00440944	0.23	6.37562
7250.77	15.68	0.435	-0.079	2	0.1	0.213	7.98574	5.98574	0.00207941	0.00116501	0.00440944	0.23	6.37562
7251.76	15.66	0.435	-0.079	2	0.1	0.213	7.97555	5.97555	0.00207941	0.00116501	0.00440944	0.23	6.37562
7252.84	15.7	0.435	-0.079	2	0.1	0.213	7.99593	5.99593	0.00207941	0.00116501	0.00440944	0.23	6.37562
7253.83	15.68	0.435	-0.079	2	0.1	0.213	7.98574	5.98574	0.00207941	0.00116501	0.00440944	0.23	6.37562
7254.81	15.68	0.435	-0.079	2	0.1	0.213	7.98574	5.98574	0.00207941	0.00116501	0.00440944	0.23	6.37562
7255.8	15.68	0.435	-0.079	2	0.1	0.213	7.98574	5.98574	0.00207941	0.00116501	0.00440944	0.23	6.37562
7256.78	15.68	0.435	-0.079	2	0.1	0.213	7.98574	5.98574	0.00207941	0.00116501	0.00440944	0.23	6.37562
7257.77	15.68	0.435	-0.079	2	0.1	0.213	7.98574	5.98574	0.00207941	0.00116501	0.00440944	0.23	6.37562
7258.76	15.7	0.435	-0.079	2	0.1	0.213	7.99593	5.99593	0.00207941	0.00116501	0.00440944	0.23	6.37562
7259.84	15.68	0.435	-0.079	2	0.1	0.213	7.98574	5.98574	0.00207941	0.00116501	0.00440944	0.23	6.37562
7260.83	15.7	0.435	-0.079	2	0.1	0.213	7.99593	5.99593	0.00207941	0.00116501	0.00440944	0.23	6.37562
7261.81	15.68	0.435	-0.079	2	0.1	0.213	7.98574	5.98574	0.00207941	0.00116501	0.00440944	0.23	6.37562
7262.8	15.7	0.435	-0.079	2	0.1	0.213	7.99593	5.99593	0.00207941	0.00116501	0.00440944	0.23	6.37562
7263.79	15.68	0.435	-0.079	2	0.1	0.213	7.98574	5.98574	0.00207941	0.00116501	0.00440944	0.23	6.37562
7264.77	15.7	0.437	-0.079	2	0.1	0.213	7.99593	5.99593	0.00209823	0.00116501	0.00442826	0.23	6.37562
7265.75	15.68	0.437	-0.079	2	0.1	0.213	7.98574	5.98574	0.00209823	0.00116501	0.00442826	0.23	6.37562
7266.85	15.7	0.437	-0.079	2	0.1	0.213	7.99593	5.99593	0.00209823	0.00116501	0.00442826	0.23	6.37562
7267.83	15.7	0.437	-0.079	2	0.1	0.213	7.99593	5.99593	0.00209823	0.00116501	0.00442826	0.23	6.37562
7268.81	15.72	0.437	-0.079	2	0.1	0.213	8.00611	6.00611	0.00209823	0.00116501	0.00442826	0.23	6.37562
7269.8	15.7	0.437	-0.079	2	0.1	0.213	7.99593	5.99593	0.00209823	0.00116501	0.00442826	0.23	6.37562
7270.78	15.7	0.437	-0.079	2	0.1	0.213	7.99593	5.99593	0.00209823	0.00116501	0.00442826	0.23	6.37562
7271.77	15.7	0.437	-0.079	2	0.1	0.213	7.99593	5.99593	0.00209823	0.00116501	0.00442826	0.23	6.37562
7272.75	15.7	0.437	-0.079	2	0.1	0.213	7.99593	5.99593	0.00209823	0.00116501	0.00442826	0.23	6.37562
7273.85	15.7	0.437	-0.079	2	0.1	0.213	7.99593	5.99593	0.00209823	0.00116501	0.00442826	0.23	6.37562
7274.83	15.7	0.437	-0.079	2	0.1	0.213	7.99593	5.99593	0.00209823	0.00116501	0.00442826	0.23	6.37562
7275.81	15.7	0.437	-0.079	2	0.1	0.213	7.99593	5.99593	0.00209823	0.00116501	0.00442826	0.23	6.37562
7276.8	15.7	0.437	-0.079	2	0.1	0.213	7.99593	5.99593	0.00209823	0.00116501	0.00442826	0.23	6.37562
7277.78	15.7	0.437	-0.079	2	0.1	0.213	7.99593	5.99593	0.00209823	0.00116501	0.00442826	0.23	6.37562
7278.77	15.7	0.437	-0.079	2	0.1	0.213	7.99593	5.99593	0.00209823	0.00116501	0.00442826	0.23	6.37562
7279.76	15.7	0.437	-0.079	2	0.1	0.213	7.99593	5.99593	0.00209823	0.00116501	0.00442826	0.23	6.37562
7280.85	15.7	0.437	-0.079	2	0.1	0.213	7.99593	5.99593	0.00209823	0.00116501	0.00442826	0.23	6.37562
7281.83	15.7	0.437	-0.079	2	0.1	0.213	7.99593	5.99593	0.00209823	0.00116501	0.00442826	0.23	6.37562
7282.81	15.72	0.437	-0.079	2	0.1	0.213	8.00611	6.00611	0.00209823	0.00116501	0.00442826	0.23	6.37562
7283.8	15.72	0.437	-0.079	2	0.1	0.213	8.00611	6.00611	0.00209823	0.00116501	0.00442826	0.23	6.37562
7284.79	15.72	0.437	-0.079	2	0.1	0.213	8.00611	6.00611	0.00209823	0.00116501	0.00442826	0.23	6.37562
7285.77	15.7	0.437	-0.079	2	0.1	0.213	7.99593	5.99593	0.00209823	0.00116501	0.00442826	0.23	6.37562
7286.76	15.72	0.437	-0.079	2	0.1	0.213	8.00611	6.00611	0.00209823	0.00116501	0.00442826	0.23	6.37562
7287.85	15.7	0.438	-0.079	2	0.1	0.213	7.99593	5.99593	0.00210764	0.00116501	0.00443767	0.23	6.37562
7288.83	15.72	0.437	-0.079	2	0.1	0.213	8.00611	6.00611	0.00209823	0.00116501	0.00442826	0.23	6.37562
7289.81	15.72	0.437	-0.079	2	0.1	0.213	8.00611	6.00611	0.00209823	0.00116501	0.00442826	0.23	6.37562
7290.8	15.72	0.437	-0.079	2	0.1	0.213	8.00611	6.00611	0.00209823	0.00116501	0.00442826	0.23	6.37562
7291.78	15.7	0.438	-0.079	2	0.1	0.213	7.99593	5.99593	0.00210764	0.00116501	0.00443767	0.23	6.37562
7292.77	15.72	0.437	-0.079	2	0.1	0.213	8.00611	6.00611	0.00209823	0.00116501	0.00442826	0.23	6.37562
7293.75	15.7	0.438	-0.079	2	0.1	0.213	7.99593	5.99593	0.00210764	0.00116501	0.00443767	0.23	6.37562
7294.84	15.7	0.438	-0.079	2	0.1	0.213	7.99593	5.99593	0.00210764	0.00116501	0.00443767	0.23	6.37562
7295.83	15.7	0.438	-0.079	2	0.1	0.213	7.99593	5.99593	0.00210764	0.00116501	0.00443767	0.23	6.37562
7296.81	15.68	0.438	-0.079	2	0.1	0.213	7.98574	5.98574	0.00210764	0.00116501	0.00443767	0.23	6.37562
7297.8	15.68	0.437	-0.079	2	0.1	0.213	7.98574	5.98574	0.00209823	0.00116501	0.00442826	0.23	6.37562
7298.78	15.7	0.437	-0.079	2	0.1	0.213	7.99593	5.99593	0.00209823	0.00116501	0.00442826	0.23	6.37562
7299.77	15.7	0.437	-0.079	2	0.1	0.213	7.99593	5.99593	0.00209823	0.00116501	0.00442826	0.23	6.37562
7300.75	15.7	0.437	-0.079	2	0.1	0.213	7.99593	5.99593	0.00209823	0.00116501	0.00442826	0.23	6.37562
7301.85	15.7	0.438	-0.079	2	0.1	0.213	7.99593	5.99593	0.00210764	0.00116501	0.00443767	0.23	6.37562
7302.83	15.7	0.438	-0.079	2	0.1	0.213	7.99593	5.99593	0.00210764	0.00116501	0.00443767	0.23	6.37562
7303.81	15.7	0.438	-0.079	2	0.1	0.213	7.99593	5.99593	0.00210764	0.00116501	0.00443767	0.23	6.37562
7304.8	15.7	0.438	-0.079	2	0.1	0.213	7.99593	5.99593	0.00210764	0.00116501	0.00443767	0.23	6.37562
7305.78	15.7	0.438	-0.079	2	0.1	0.213	7.99593	5.99593	0.00210764	0.00116501	0.00443767	0.23	6.37562
7306.77	15.7	0.438	-0.079	2	0.1	0.213	7.99593	5.99593	0.00210764	0.00116501	0.00443767	0.23	6.37562
7307.75	15.7	0.437	-0.079	2	0.1	0.213	7.99593	5.99593	0.00209823	0.00116501	0.00442826	0.23	6.37562
7308.84	15.7	0.438	-0.079	2	0.1	0.213	7.99593	5.99593	0.00210764	0.00116501	0.00443767	0.23	6.37562
7309.83	15.7	0.438	-0.079	2	0.1	0.213	7.99593	5.99593	0.00210764	0.00116501	0.00443767	0.23	6.37562
7310.81	15.7	0.438	-0.079	2	0.1	0.213	7.99593	5.99593	0.00210764	0.00116501	0.00443767	0.23	6.37562
7311.8	15.7	0.438	-0.079	2	0.1	0.213	7.99593	5.99593	0.00210764	0.00116501	0.00443767	0.23	6.37562
7312.78	15.7	0.438	-0.079	2	0.1	0.213	7.99593	5.99593	0.00210764	0.00116501	0.00443767	0.23	6.37562
7313.77	15.72	0.438	-0.079	2	0.1	0.213	8.00611	6.00611	0.00210764	0.00116501	0.00443767	0.23	6.37562
7314.76	15.72	0.438	-0.079	2	0.1	0.213	8.00611	6.00611	0.00210764	0.00116501	0.00443767	0.23	6.37562
7315.84	15.7	0.438	-0.079	2	0.1	0.213	7.99593	5.99593	0.00210764	0.00116501	0.00443767	0.23	6.37562
7316.83	15.7	0.438	-0.079	2	0.1	0.213	7.99593	5.99593	0.00210764	0.00116501	0.00443767	0.23	6.37562
7317.81	15.7	0.438	-0.079	2	0.1	0.213	7.99593	5.99593	0.00210764	0.00116501	0.00443767	0.23	6.37562
7318.8	15.7	0.438	-0.079	2	0.1	0.213	7.99593	5.99593	0.00210764	0.00116501	0.00443767	0.23	6.37562
7319.78	15.7	0.438	-0.079	2	0.1	0.213	7.99593	5.99593	0.00210764	0.00116501	0.00443767	0.23	6.37562
7320.77	15.7	0.438	-0.079	2	0.1	0.213	7.99593	5.99593	0.00210764	0.00116501	0.00443767	0.23	6.37562
7321.75	15.7	0.438	-0.079	2	0.1	0.213	7.99593	5.99593	0.00210764	0.00116501	0.00443767	0.23	6.37562
7322.84	15.7	0.438	-0.079	2	0.1	0.213	7.99593	5.99593	0.00210764	0.00116501	0.00443767	0.23	6.37562
7323.83	15.7	0.438	-0.079	2	0.1	0.213	7.99593	5.99593	0.00210764	0.00116501	0.00443767	0.23	6.37562
7324.81	15.7	0.438	-0.079	2	0.1	0.213	7.99593	5.99593	0.00210764	0.00116501	0.00443767	0.23	6.37562
7325.8	15.7	0.438	-0.079	2	0.1	0.213	7.99593	5.99593	0.00210764	0.00116501	0.00443767	0.23	6.37562
7326.78	15.7	0.438	-0.078	2	0.1	0.213	7.99593	5.99593	0.00210764	0.00117138	0.0044504	0.23	6.37562
7327.77	15.7	0.438	-0.079	2	0.1	0.213	7.99593	5.99593	0.00210764	0.00116501	0.00443767	0.23	6.37562
7328.75	15.7	0.438	-0.079	2	0.1	0.213	7.99593	5.99593	0.00210764	0.00116501	0.00443767	0.23	6.37562
7329.85	15.7	0.438	-0.079	2	0.1	0.213	7.99593	5.99593	0.00210764	0.00116501	0.00443767	0.23	6.37562
7330.83	15.7	0.438	-0.079	2	0.1	0.213	7.99593	5.99593	0.00210764	0.00116501	0.00443767	0.23	6.37562
7331.81	15.7	0.438	-0.079	2	0.1	0.213	7.99593	5.99593	0.00210764	0.00116501	0.00443767	0.23	6.37562
7332.8	15.7	0.438	-0.079	2	0.1	0.213	7.99593	5.99593	0.00210764	0.00116501	0.00443767	0.23	6.37562
7333.78	15.74	0.44	-0.079	2	0.1	0.213	8.0163	6.0163	0.00212646	0.00116501	0.00445649	0.23	6.37562
7334.77	15.74	0.438	-0.079	2	0.1	0.213	8.0163	6.0163	0.00210764	0.00116501	0.00443767	0.23	6.37562
7335.75	15.72	0.44	-0.079	2	0.1	0.213	8.00611	6.00611	0.00212646	0.00116501	0.00445649	0.23	6.37562
7336.85	15.7	0.44	-0.079	2	0.1	0.213	7.99593	5.99593	0.00212646	0.00116501	0.00445649	0.23	6.37562
7337.83	15.7	0.438	-0.079	2	0.1	0.213	7.99593	5.99593	0.00210764	0.00116501	0.00443767	0.23	6.37562
7338.81	15.7	0.44	-0.079	2	0.1	0.213	7.99593	5.99593	0.00212646	0.00116501	0.00445649	0.23	6.37562
7339.8	15.7	0.44	-0.079	2	0.1	0.213	7.99593	5.99593	0.00212646	0.00116501	0.00445649	0.23	6.37562
7340.79	15.7	0.438	-0.079	2	0.1	0.213	7.99593	5.99593	0.00210764	0.00116501	0.00443767	0.23	6.37562
7341.77	15.7	0.44	-0.079	2	0.1	0.213	7.99593	5.99593	0.00212646	0.00116501	0.00445649	0.23	6.37562
7342.75	15.7	0.44	-0.079	2	0.1	0.213	7.99593	5.99593	0.00212646	0.00116501	0.00445649	0.23	6.37562
7343.85	15.7	0.438	-0.079	2	0.1	0.213	7.99593	5.99593	0.00210764	0.00116501	0.00443767	0.23	6.37562
7344.83	15.7	0.44	-0.079	2	0.1	0.213	7.99593	5.99593	0.00212646	0.00116501	0.00445649	0.23	6.37562
7345.81	15.7	0.44	-0.079	2	0.1	0.213	7.99593	5.99593	0.00212646	0.00116501	0.00445649	0.23	6.37562
7346.8	15.7	0.44	-0.079	2	0.1	0.213	7.99593	5.99593	0.00212646	0.00116501	0.00445649	0.23	6.37562
7347.78	15.7	0.44	-0.079	2	0.1	0.213	7.99593	5.99593	0.00212646	0.00116501	0.00445649	0.23	6.37562
7348.77	15.7	0.44	-0.079	2	0.1	0.213	7.99593	5.99593	0.00212646	0.00116501	0.00445649	0.23	6.37562
7349.75	15.7	0.438	-0.079	2	0.1	0.213	7.99593	5.99593	0.00210764	0.00116501	0.00443767	0.23	6.37562
7350.85	15.7	0.44	-0.079	2	0.1	0.213	7.99593	5.99593	0.00212646	0.00116501	0.00445649	0.23	6.37562
7351.83	15.7	0.438	-0.079	2	0.1	0.213	7.99593	5.99593	0.00210764	0.00116501	0.00443767	0.23	6.37562
7352.81	15.7	0.44	-0.079	2	0.1	0.213	7.99593	5.99593	0.00212646	0.00116501	0.00445649	0.23	6.37562
7353.8	15.7	0.44	-0.079	2	0.1	0.213	7.99593	5.99593	0.00212646	0.00116501	0.00445649	0.23	6.37562
7354.78	15.7	0.44	-0.079	2	0.1	0.213	7.99593	5.99593	0.00212646	0.00116501	0.00445649	0.23	6.37562
7355.77	15.7	0.44	-0.079	2	0.1	0.213	7.99593	5.99593	0.00212646	0.00116501	0.00445649	0.23	6.37562
7356.75	15.7	0.44	-0.079	2	0.1	0.213	7.99593	5.99593	0.00212646	0.00116501	0.00445649	0.23	6.37562
7357.85	15.7	0.438	-0.079	2	0.1	0.213	7.99593	5.99593	0.00210764	0.00116501	0.00443767	0.23	6.37562
7358.83	15.7	0.44	-0.079	2	0.1	0.213	7.99593	5.99593	0.00212646	0.00116501	0.00445649	0.23	6.37562
7359.81	15.7	0.44	-0.079	2	0.1	0.213	7.99593	5.99593	0.00212646	0.00116501	0.00445649	0.23	6.37562
7360.8	15.7	0.44	-0.079	2	0.1	0.213	7.99593	5.99593	0.00212646	0.00116501	0.00445649	0.23	6.37562
7361.79	15.7	0.44	-0.079	2	0.1	0.213	7.99593	5.99593	0.00212646	0.00116501	0.00445649	0.23	6.37562
7362.77	15.7	0.44	-0.079	2	0.1	0.213	7.99593	5.99593	0.00212646	0.00116501	0.00445649	0.23	6.37562
7363.76	15.7	0.44	-0.079	2	0.1	0.213	7.99593	5.99593	0.00212646	0.00116501	0.00445649	0.23	6.37562
7364.85	15.7	0.44	-0.078	2	0.1	0.213	7.99593	5.99593	0.00212646	0.00117138	0.00446922	0.23	6.37562
7365.83	15.7	0.44	-0.078	2	0.1	0.213	7.99593	5.99593	0.00212646	0.00117138	0.00446922	0.23	6.37562
7366.81	15.7	0.44	-0.079	2	0.1	0.213	7.99593	5.99593	0.00212646	0.00116501	0.00445649	0.23	6.37562
7367.8	15.7	0.44	-0.079	2	0.1	0.213	7.99593	5.99593	0.00212646	0.00116501	0.00445649	0.23	6.37562
7368.79	15.7	0.44	-0.079	2	0.1	0.213	7.99593	5.99593	0.00212646	0.00116501	0.00445649	0.23	6.37562
7369.77	15.7	0.44	-0.079	2	0.1	0.213	7.99593	5.99593	0.00212646	0.00116501	0.00445649	0.23	6.37562
7370.75	15.7	0.44	-0.078	2	0.1	0.213	7.99593	5.99593	0.00212646	0.00117138	0.00446922	0.23	6.37562
7371.85	15.7	0.44	-0.079	2	0.1	0.213	7.99593	5.99593	0.00212646	0.00116501	0.00445649	0.23	6.37562
7372.83	15.7	0.44	-0.079	2	0.1	0.213	7.99593	5.99593	0.00212646	0.00116501	0.00445649	0.23	6.37562
7373.81	15.7	0.44	-0.079	2	0.1	0.213	7.99593	5.99593	0.00212646	0.00116501	0.00445649	0.23	6.37562
7374.8	15.7	0.44	-0.079	2	0.1	0.213	7.99593	5.99593	0.00212646	0.00116501	0.00445649	0.23	6.37562
7375.78	15.7	0.44	-0.079	2	0.1	0.213	7.99593	5.99593	0.00212646	0.00116501	0.00445649	0.23	6.37562
7376.77	15.7	0.44	-0.079	2	0.1	0.213	7.99593	5.99593	0.00212646	0.00116501	0.00445649	0.23	6.37562
7377.75	15.7	0.44	-0.079	2	0.1	0.213	7.99593	5.99593	0.00212646	0.00116501	0.00445649	0.23	6.37562
7378.85	15.7	0.44	-0.079	2	0.1	0.213	7.99593	5.99593	0.00212646	0.00116501	0.00445649	0.23	6.37562
7379.83	15.7	0.44	-0.079	2	0.1	0.213	7.99593	5.99593	0.00212646	0.00116501	0.00445649	0.23	6.37562
7380.81	15.7	0.44	-0.079	2.005	0.1	0.213	7.99593	5.99093	0.00212646	0.00116501	0.00445649	0.23	6.37562
7381.8	15.7	0.44	-0.078	2.05	0.1	0.213	7.99593	5.94593	0.00212646	0.00117138	0.00446922	0.23	6.37562
7382.78	15.7	0.44	-0.078	2.06	0.1	0.213	7.99593	5.93593	0.00212646	0.00117138	0.00446922	0.23	6.37562
7383.77	15.7	0.44	-0.077	2.095	0.1	0.213	7.99593	5.90093	0.00212646	0.00117775	0.00448195	0.23	6.37562
7384.75	15.7	0.44	-0.077	2.15	0.1	0.213	7.99593	5.84593	0.00212646	0.00117775	0.00448195	0.23	6.37562
7385.84	15.7	0.44	-0.076	2.22	0.1	0.213	7.99593	5.77593	0.00212646	0.00118411	0.00449468	0.23	6.37562
7386.83	15.7	0.44	-0.075	2.285	0.1	0.213	7.99593	5.71093	0.00212646	0.00119048	0.00450742	0.23	6.37562
7387.81	15.7	0.44	-0.074	2.35	0.1	0.213	7.99593	5.64593	0.00212646	0.00119685	0.00452015	0.23	6.37562
7388.8	15.7	0.44	-0.073	2.395	0.1	0.213	7.99593	5.60093	0.00212646	0.00120321	0.00453288	0.23	6.37562
7389.79	15.7	0.442	-0.071	2.45	0.1	0.213	7.99593	5.54593	0.00214528	0.00121594	0.00457716	0.225	6.23702
7390.77	15.7	0.44	-0.07	2.5	0.1	0.213	7.99593	5.49593	0.00212646	0.00122231	0.00457108	0.225	6.23702
7391.76	15.7	0.44	-0.069	2.56	0.1	0.213	7.99593	5.43593	0.00212646	0.00122868	0.00458381	0.225	6.23702
7392.84	15.7	0.44	-0.068	2.61	0.1	0.213	7.99593	5.38593	0.00212646	0.00123504	0.00459654	0.225	6.23702
7393.83	15.7	0.442	-0.067	2.66	0.1	0.213	7.99593	5.33593	0.00214528	0.00124141	0.00462809	0.225	6.23702
7394.81	15.7	0.44	-0.067	2.695	0.1	0.213	7.99593	5.30093	0.00212646	0.00124141	0.00460928	0.225	6.23702
7395.8	15.7	0.44	-0.066	2.755	0.1	0.213	7.99593	5.24093	0.00212646	0.00124777	0.00462201	0.225	6.23702
7396.78	15.7	0.44	-0.065	2.795	0.1	0.213	7.99593	5.20093	0.00212646	0.00125414	0.00463474	0.225	6.23702
7397.77	15.7	0.442	-0.064	2.845	0.1	0.213	7.99593	5.15093	0.00214528	0.00126051	0.00466629	0.22	6.09842
7398.75	15.7	0.442	-0.064	2.89	0.1	0.213	7.99593	5.10593	0.00214528	0.00126051	0.00466629	0.22	6.09842
7399.85	15.7	0.442	-0.063	2.945	0.1	0.213	7.99593	5.05093	0.00214528	0.00126687	0.00467902	0.22	6.09842
7400.83	15.7	0.442	-0.062	2.995	0.1	0.213	7.99593	5.00093	0.00214528	0.00127324	0.00469176	0.22	6.09842
7401.81	15.7	0.442	-0.061	3.04	0.1	0.213	7.99593	4.95593	0.00214528	0.00127961	0.00470449	0.22	6.09842
7402.8	15.7	0.442	-0.06	3.085	0.1	0.213	7.99593	4.91093	0.00214528	0.00128597	0.00471722	0.22	6.09842
7403.78	15.7	0.442	-0.059	3.14	0.1	0.213	7.99593	4.85593	0.00214528	0.00129234	0.00472995	0.22	6.09842
7404.77	15.7	0.442	-0.058	3.195	0.1	0.213	7.99593	4.80093	0.00214528	0.0012987	0.00474269	0.22	6.09842
7405.75	15.7	0.442	-0.057	3.24	0.1	0.213	7.99593	4.75593	0.00214528	0.00130507	0.00475542	0.215	5.95982
7406.84	15.7	0.442	-0.056	3.295	0.1	0.213	7.99593	4.70093	0.00214528	0.00131144	0.00476815	0.215	5.95982
7407.83	15.7	0.442	-0.055	3.35	0.1	0.213	7.99593	4.64593	0.00214528	0.0013178	0.00478088	0.215	5.95982
7408.81	15.7	0.442	-0.054	3.39	0.1	0.213	7.99593	4.60593	0.00214528	0.00132417	0.00479361	0.215	5.95982
7409.8	15.7	0.442	-0.052	3.45	0.1	0.213	7.99593	4.54593	0.00214528	0.0013369	0.00481908	0.215	5.95982
7410.78	15.7	0.442	-0.051	3.495	0.1	0.213	7.99593	4.50093	0.00214528	0.00134327	0.00483181	0.215	5.95982
7411.77	15.7	0.442	-0.05	3.545	0.1	0.213	7.99593	4.45093	0.00214528	0.00134963	0.00484454	0.215	5.95982
7412.75	15.7	0.442	-0.049	3.595	0.1	0.213	7.99593	4.40093	0.00214528	0.001356	0.00485728	0.215	5.95982
7413.85	15.7	0.442	-0.048	3.65	0.1	0.213	7.99593	4.34593	0.00214528	0.00136237	0.00487001	0.21	5.82122
7414.83	15.7	0.442	-0.047	3.695	0.1	0.213	7.99593	4.30093	0.00214528	0.00136873	0.00488274	0.21	5.82122
7415.81	15.7	0.442	-0.046	3.74	0.1	0.213	7.99593	4.25593	0.00214528	0.0013751	0.00489547	0.21	5.82122
7416.8	15.7	0.442	-0.045	3.79	0.1	0.213	7.99593	4.20593	0.00214528	0.00138146	0.00490821	0.21	5.82122
7417.78	15.7	0.442	-0.044	3.845	0.1	0.213	7.99593	4.15093	0.00214528	0.00138783	0.00492094	0.21	5.82122
7418.77	15.7	0.442	-0.043	3.89	0.1	0.213	7.99593	4.10593	0.00214528	0.0013942	0.00493367	0.21	5.82122
7419.75	15.7	0.442	-0.042	3.94	0.1	0.213	7.99593	4.05593	0.00214528	0.00140056	0.0049464	0.21	5.82122
7420.84	15.7	0.442	-0.041	3.99	0.1	0.213	7.99593	4.00593	0.00214528	0.00140693	0.00495914	0.21	5.82122
7421.83	15.7	0.442	-0.04	4.05	0.1	0.213	7.99593	3.94593	0.00214528	0.0014133	0.00497187	0.21	5.82122
7422.81	15.7	0.442	-0.039	4.095	0.1	0.213	7.99593	3.90093	0.00214528	0.00141966	0.0049846	0.205	5.68262
7423.8	15.7	0.442	-0.038	4.145	0.1	0.213	7.99593	3.85093	0.00214528	0.00142603	0.00499733	0.205	5.68262
7424.79	15.7	0.442	-0.037	4.195	0.1	0.213	7.99593	3.80093	0.00214528	0.00143239	0.00501007	0.205	5.68262
7425.77	15.7	0.442	-0.035	4.25	0.1	0.213	7.99593	3.74593	0.00214528	0.00144513	0.00503553	0.205	5.68262
7426.76	15.7	0.442	-0.034	4.295	0.1	0.213	7.99593	3.70093	0.00214528	0.00145149	0.00504826	0.205	5.68262
7427.85	15.7	0.442	-0.033	4.345	0.1	0.213	7.99593	3.65093	0.00214528	0.00145786	0.005061	0.205	5.68262
7428.83	15.7	0.442	-0.032	4.395	0.1	0.213	7.99593	3.60093	0.00214528	0.00146423	0.00507373	0.205	5.68262
7429.81	15.7	0.442	-0.031	4.45	0.1	0.213	7.99593	3.54593	0.00214528	0.00147059	0.00508646	0.205	5.68262
7430.8	15.7	0.442	-0.03	4.495	0.1	0.213	7.99593	3.50093	0.00214528	0.00147696	0.00509919	0.205	5.68262
7431.78	15.7	0.443	-0.029	4.545	0.1	0.213	7.99593	3.45093	0.00215469	0.00148332	0.00512133	0.205	5.68262
7432.77	15.7	0.442	-0.028	4.59	0.1	0.213	7.99593	3.40593	0.00214528	0.00148969	0.00512466	0.205	5.68262
7433.75	15.7	0.442	-0.027	4.64	0.1	0.213	7.99593	3.35593	0.00214528	0.00149606	0.00513739	0.205	5.68262
7434.85	15.7	0.443	-0.026	4.695	0.1	0.213	7.99593	3.30093	0.00215469	0.00150242	0.00515953	0.205	5.68262
7435.83	15.7	0.443	-0.025	4.745	0.1	0.213	7.99593	3.25093	0.00215469	0.00150879	0.00517226	0.205	5.68262
7436.81	15.7	0.443	-0.024	4.79	0.1	0.213	7.99593	3.20593	0.00215469	0.00151516	0.005185	0.205	5.68262
7437.8	15.7	0.443	-0.023	4.84	0.1	0.213	7.99593	3.15593	0.00215469	0.00152152	0.00519773	0.2	5.54402
7438.79	15.7	0.443	-0.022	4.895	0.1	0.213	7.99593	3.10093	0.00215469	0.00152789	0.00521046	0.2	5.54402
7439.77	15.7	0.443	-0.021	4.945	0.1	0.213	7.99593	3.05093	0.00215469	0.00153425	0.00522319	0.2	5.54402
7440.75	15.7	0.443	-0.02	4.99	0.1	0.213	7.99593	3.00593	0.00215469	0.00154062	0.00523593	0.2	5.54402
7441.84	15.7	0.443	-0.019	5.05	0.1	0.213	7.99593	2.94593	0.00215469	0.00154699	0.00524866	0.2	5.54402
7442.83	15.7	0.442	-0.018	5.09	0.1	0.213	7.99593	2.90593	0.00214528	0.00155335	0.00525198	0.2	5.54402
7443.81	15.7	0.443	-0.017	5.145	0.1	0.213	7.99593	2.85093	0.00215469	0.00155972	0.00527412	0.2	5.54402
7444.8	15.7	0.443	-0.016	5.195	0.1	0.213	7.99593	2.80093	0.00215469	0.00156608	0.00528686	0.2	5.54402
7445.78	15.7	0.443	-0.015	5.245	0.1	0.213	7.99593	2.75093	0.00215469	0.00157245	0.00529959	0.2	5.54402
7446.77	15.7	0.443	-0.014	5.29	0.1	0.213	7.99593	2.70593	0.00215469	0.00157882	0.00531232	0.2	5.54402
7447.75	15.7	0.443	-0.013	5.34	0.1	0.213	7.99593	2.65593	0.00215469	0.00158518	0.00532505	0.195	5.40541
7448.85	15.7	0.443	-0.011	5.4	0.1	0.213	7.99593	2.59593	0.00215469	0.00159792	0.00535052	0.195	5.40541
7449.83	15.7	0.443	-0.01	5.45	0.1	0.213	7.99593	2.54593	0.00215469	0.00160428	0.00536325	0.195	5.40541
7450.81	15.7	0.443	-0.009	5.495	0.1	0.213	7.99593	2.50093	0.00215469	0.00161065	0.00537598	0.195	5.40541
7451.8	15.7	0.443	-0.008	5.545	0.1	0.213	7.99593	2.45093	0.00215469	0.00161701	0.00538871	0.195	5.40541
7452.78	15.7	0.443	-0.007	5.595	0.1	0.213	7.99593	2.40093	0.00215469	0.00162338	0.00540145	0.195	5.40541
7453.77	15.7	0.443	-0.006	5.65	0.1	0.213	7.99593	2.34593	0.00215469	0.00162975	0.00541418	0.195	5.40541
7454.75	15.7	0.443	-0.005	5.69	0.1	0.213	7.99593	2.30593	0.00215469	0.00163611	0.00542691	0.195	5.40541
7455.85	15.7	0.445	-0.004	5.75	0.1	0.213	7.99593	2.24593	0.0021735	0.00164248	0.00545846	0.195	5.40541
7456.83	15.7	0.443	-0.003	5.8	0.1	0.213	7.99593	2.19593	0.00215469	0.00164885	0.00545238	0.195	5.40541
7457.81	15.7	0.445	-0.002	5.85	0.1	0.213	7.99593	2.14593	0.0021735	0.00165521	0.00548393	0.195	5.40541
7458.8	15.7	0.443	-0.001	5.895	0.1	0.213	7.99593	2.10093	0.00215469	0.00166158	0.00547784	0.195	5.40541
7459.79	15.7	0.445	0	5.945	0.1	0.213	7.99593	2.05093	0.0021735	0.00166794	0.00550939	0.195	5.40541
7460.77	15.7	0.443	0.001	5.995	0.1	0.213	7.99593	2.00093	0.00215469	0.00167431	0.00550331	0.19	5.26681
7461.75	15.7	0.443	0.002	6.04	0.1	0.213	7.99593	1.95593	0.00215469	0.00168068	0.00551604	0.19	5.26681
7462.85	15.7	0.445	0.003	6.09	0.1	0.213	7.99593	1.90593	0.0021735	0.00168704	0.00554759	0.19	5.26681
7463.83	15.7	0.445	0.004	6.155	0.1	0.213	7.99593	1.84093	0.0021735	0.00169341	0.00556032	0.19	5.26681
7464.81	15.7	0.443	0.005	6.2	0.1	0.213	7.99593	1.79593	0.00215469	0.00169977	0.00555424	0.19	5.26681
7465.8	15.7	0.445	0.006	6.25	0.1	0.213	7.99593	1.74593	0.0021735	0.00170614	0.00558579	0.19	5.26681
7466.79	15.7	0.445	0.007	6.285	0.1	0.213	7.99593	1.71093	0.0021735	0.00171251	0.00559852	0.19	5.26681
7467.77	15.7	0.445	0.008	6.345	0.1	0.213	7.99593	1.65093	0.0021735	0.00171887	0.00561125	0.19	5.26681
7468.75	15.7	0.445	0.009	6.39	0.1	0.213	7.99593	1.60593	0.0021735	0.00172524	0.00562398	0.19	5.26681
7469.85	15.7	0.445	0.01	6.45	0.1	0.213	7.99593	1.54593	0.0021735	0.00173161	0.00563672	0.19	5.26681
7470.83	15.7	0.445	0.011	6.495	0.1	0.213	7.99593	1.50093	0.0021735	0.00173797	0.00564945	0.19	5.26681
7471.81	15.7	0.445	0.012	6.55	0.1	0.213	7.99593	1.44593	0.0021735	0.00174434	0.00566218	0.19	5.26681
7472.8	15.7	0.445	0.013	6.595	0.1	0.213	7.99593	1.40093	0.0021735	0.0017507	0.00567491	0.19	5.26681
7473.78	15.7	0.445	0.014	6.645	0.1	0.213	7.99593	1.35093	0.0021735	0.00175707	0.00568765	0.19	5.26681
7474.77	15.7	0.445	0.014	6.69	0.1	0.213	7.99593	1.30593	0.0021735	0.00175707	0.00568765	0.185	5.12821
7475.75	15.7	0.445	0.015	6.745	0.1	0.213	7.99593	1.25093	0.0021735	0.00176344	0.00570038	0.185	5.12821
7476.85	15.7	0.445	0.016	6.795	0.1	0.213	7.99593	1.20093	0.0021735	0.0017698	0.00571311	0.185	5.12821
7477.83	15.7	0.445	0.017	6.85	0.1	0.213	7.99593	1.14593	0.0021735	0.00177617	0.00572584	0.185	5.12821
7478.81	15.7	0.447	0.018	6.895	0.1	0.213	7.99593	1.10093	0.00219232	0.00178254	0.00575739	0.185	5.12821
7479.8	15.7	0.447	0.019	6.95	0.1	0.213	7.99593	1.04593	0.00219232	0.0017889	0.00577013	0.185	5.12821
7480.78	15.7	0.447	0.02	6.99	0.1	0.213	7.99593	1.00593	0.00219232	0.00179527	0.00578286	0.185	5.12821
7481.77	15.7	0.447	0.021	7.045	0.1	0.213	7.99593	0.950926	0.00219232	0.00180163	0.00579559	0.185	5.12821
7482.76	15.7	0.447	0.022	7.09	0.1	0.213	7.99593	0.905926	0.00219232	0.001808	0.00580832	0.185	5.12821
7483.85	15.7	0.447	0.023	7.145	0.1	0.213	7.99593	0.850926	0.00219232	0.00181437	0.00582105	0.185	5.12821
7484.83	15.7	0.447	0.024	7.195	0.1	0.213	7.99593	0.800926	0.00219232	0.00182073	0.00583379	0.185	5.12821
7485.81	15.7	0.447	0.025	7.245	0.1	0.213	7.99593	0.750926	0.00219232	0.0018271	0.00584652	0.185	5.12821
7486.8	15.7	0.447	0.025	7.295	0.1	0.213	7.99593	0.700926	0.00219232	0.0018271	0.00584652	0.185	5.12821
7487.78	15.7	0.447	0.026	7.345	0.1	0.213	7.99593	0.650926	0.00219232	0.00183346	0.00585925	0.185	5.12821
7488.77	15.7	0.447	0.027	7.395	0.1	0.213	7.99593	0.600926	0.00219232	0.00183983	0.00587198	0.185	5.12821
7489.75	15.7	0.448	0.028	7.45	0.1	0.213	7.99593	0.545926	0.00220173	0.0018462	0.00589413	0.185	5.12821
7490.84	15.7	0.447	0.029	7.495	0.1	0.213	7.99593	0.500926	0.00219232	0.00185256	0.00589745	0.185	5.12821
7491.83	15.7	0.447	0.03	7.55	0.1	0.213	7.99593	0.445926	0.00219232	0.00185893	0.00591018	0.185	5.12821
7492.81	15.7	0.447	0.031	7.59	0.1	0.213	7.99593	0.405926	0.00219232	0.0018653	0.00592291	0.18	4.98961
7493.8	15.7	0.448	0.032	7.645	0.1	0.213	7.99593	0.350926	0.00220173	0.00187166	0.00594506	0.18	4.98961
7494.78	15.7	0.447	0.033	7.69	0.1	0.213	7.99593	0.305926	0.00219232	0.00187803	0.00594838	0.18	4.98961
7495.77	15.7	0.448	0.033	7.75	0.1	0.213	7.99593	0.245926	0.00220173	0.00187803	0.00595779	0.18	4.98961
7496.76	15.7	0.448	0.034	7.8	0.1	0.213	7.99593	0.195926	0.00220173	0.00188439	0.00597052	0.18	4.98961
7497.85	15.7	0.448	0.035	7.85	0.1	0.213	7.99593	0.145926	0.00220173	0.00189076	0.00598325	0.18	4.98961
7498.83	15.7	0.448	0.036	7.9	0.1	0.213	7.99593	0.0959256	0.00220173	0.00189713	0.00599599	0.18	4.98961
7499.81	15.7	0.448	0.037	7.95	0.1	0.213	7.99593	0.0459256	0.00220173	0.00190349	0.00600872	0.18	4.98961
7500.8	15.7	0.448	0.038	7.99	0.1	0.213	7.99593	0.00592564	0.00220173	0.00190986	0.00602145	0.18	4.98961
7501.79	15.7	0.448	0.039	8.045	0.1	0.213	7.99593	-0.0490744	0.00220173	0.00191623	0.00603418	0.18	4.98961
7502.77	15.7	0.448	0.039	8.09	0.1	0.213	7.99593	-0.0940744	0.00220173	0.00191623	0.00603418	0.18	4.98961
7503.75	15.7	0.448	0.04	8.14	0.1	0.213	7.99593	-0.144074	0.00220173	0.00192259	0.00604691	0.18	4.98961
7504.85	15.7	0.45	0.041	8.2	0.1	0.213	7.99593	-0.204074	0.00222055	0.00192896	0.00607847	0.18	4.98961
7505.83	15.7	0.45	0.042	8.25	0.1	0.213	7.99593	-0.254074	0.00222055	0.00193532	0.0060912	0.18	4.98961
7506.81	15.7	0.45	0.043	8.29	0.1	0.213	7.99593	-0.294074	0.00222055	0.00194169	0.00610393	0.18	4.98961
7507.8	15.7	0.45	0.044	8.34	0.1	0.213	7.99593	-0.344074	0.00222055	0.00194806	0.00611666	0.18	4.98961
7508.78	15.7	0.45	0.044	8.39	0.1	0.213	7.99593	-0.394074	0.00222055	0.00194806	0.00611666	0.175	4.85101
7509.77	15.7	0.45	0.045	8.45	0.1	0.213	7.99593	-0.454074	0.00222055	0.00195442	0.00612939	0.175	4.85101
7510.75	15.7	0.45	0.046	8.365	0.1	0.213	7.99593	-0.369074	0.00222055	0.00196079	0.00614213	0.175	4.85101
7511.85	15.7	0.45	0.046	8.29	0.1	0.213	7.99593	-0.294074	0.00222055	0.00196079	0.00614213	0.175	4.85101
7512.83	15.7	0.45	0.046	8.315	0.1	0.213	7.99593	-0.319074	0.00222055	0.00196079	0.00614213	0.175	4.85101
7513.81	15.7	0.45	0.046	8.365	0.1	0.213	7.99593	-0.369074	0.00222055	0.00196079	0.00614213	0.175	4.85101
7514.8	15.7	0.45	0.046	8.39	0.1	0.213	7.99593	-0.394074	0.00222055	0.00196079	0.00614213	0.175	4.85101
7515.78	15.7	0.45	0.046	8.415	0.1	0.213	7.99593	-0.419074	0.00222055	0.00196079	0.00614213	0.175	4.85101
7516.77	15.7	0.45	0.046	8.43	0.1	0.213	7.99593	-0.434074	0.00222055	0.00196079	0.00614213	0.175	4.85101
7517.76	15.7	0.452	0.047	8.45	0.1	0.213	7.99593	-0.454074	0.00223937	0.00196716	0.00617368	0.175	4.85101
7518.85	15.7	0.45	0.047	8.45	0.1	0.213	7.99593	-0.454074	0.00222055	0.00196716	0.00615486	0.175	4.85101
7519.83	15.7	0.45	0.047	8.47	0.1	0.213	7.99593	-0.474074	0.00222055	0.00196716	0.00615486	0.175	4.85101
7520.81	15.7	0.45	0.047	8.47	0.1	0.213	7.99593	-0.474074	0.00222055	0.00196716	0.00615486	0.175	4.85101
7521.8	15.7	0.45	0.048	8.485	0.1	0.213	7.99593	-0.489074	0.00222055	0.00197352	0.00616759	0.175	4.85101
7522.79	15.7	0.45	0.048	8.495	0.1	0.213	7.99593	-0.499074	0.00222055	0.00197352	0.00616759	0.175	4.85101
7523.77	15.7	0.45	0.048	8.505	0.1	0.213	7.99593	-0.509074	0.00222055	0.00197352	0.00616759	0.175	4.85101
[truncated: 6,182 more rows]
