# Supplementary material for: Study on Deformation and Permeation Properties of Gas-Containing Fractured Rock
Source: Hindawi journal article supplement (doi:10.1155/2019/1967080), 2019-06-25
Supplement: f1 [file 1967080.f1.zip › Sample j2.xls]

## Sheet: sample j2
test number	j2-2.0-0.2-
test data	2017-10-22
tester	y
specimen gauge length (mm)	103.72
diameter	50
area (mm^2)	1963.5
maximum force (kN)	62.78
compressive strength (MPa)	31.97
yield(kN):
yield strength(MPa):	0
poisson's ratio	0.44
remarks:	liexiyanti
Time(s)	axial force (kN)	displacement (mm)	radial deformation	confining pressure (MPa)	inlet pressure (MPa)	outlet pressure (MPa)	axial stress (MPa)	deviatoric stress (MPa)	axial strain	radial strain	volumetric strain	flow rate	permeability (mD)
507.27	3.94	0.258	-1.055	2	0.1	0.213	2.00662	0.00662083	0	0	0	0.465	12.5817
508.254	4.02	0.259	-1.055	2	0.1	0.213	2.04736	0.0473644	9.64134e-06	0	9.64134e-06	0.465	12.5817
509.238	4.08	0.259	-1.055	2	0.1	0.213	2.07792	0.0779221	9.64134e-06	0	9.64134e-06	0.465	12.5817
510.224	4.1	0.259	-1.055	2	0.1	0.213	2.08811	0.088108	9.64134e-06	0	9.64134e-06	0.465	12.5817
511.208	4.18	0.263	-1.055	2	0.1	0.213	2.12885	0.128852	4.82067e-05	0	4.82067e-05	0.465	12.5817
512.195	4.24	0.263	-1.055	2	0.1	0.213	2.15941	0.159409	4.82067e-05	0	4.82067e-05	0.465	12.5817
513.286	4.3	0.264	-1.055	2	0.1	0.213	2.18997	0.189967	5.78481e-05	0	5.78481e-05	0.465	12.5817
514.272	4.36	0.266	-1.055	2	0.1	0.213	2.22052	0.220525	7.71307e-05	0	7.71307e-05	0.465	12.5817
515.254	4.42	0.268	-1.055	2	0.1	0.213	2.25108	0.251082	9.64134e-05	0	9.64134e-05	0.465	12.5817
516.242	4.46	0.268	-1.055	2	0.1	0.213	2.27145	0.271454	9.64134e-05	0	9.64134e-05	0.465	12.5817
517.223	4.52	0.269	-1.055	2	0.1	0.213	2.30201	0.302012	0.000106055	0	0.000106055	0.465	12.5817
518.208	4.56	0.271	-1.055	2	0.1	0.213	2.32238	0.322383	0.000125337	0	0.000125337	0.46	12.4464
519.193	4.62	0.273	-1.055	2	0.1	0.213	2.35294	0.352941	0.00014462	0	0.00014462	0.46	12.4464
520.285	4.66	0.274	-1.055	2	0.1	0.213	2.37331	0.373313	0.000154261	0	0.000154261	0.46	12.4464
521.27	4.72	0.274	-1.055	2	0.1	0.213	2.40387	0.403871	0.000154261	0	0.000154261	0.46	12.4464
522.258	4.76	0.278	-1.055	2	0.1	0.213	2.42424	0.424242	0.000192827	0	0.000192827	0.46	12.4464
523.244	4.82	0.278	-1.055	2	0.1	0.213	2.4548	0.4548	0.000192827	0	0.000192827	0.46	12.4464
524.223	4.86	0.279	-1.055	2	0.1	0.213	2.47517	0.475172	0.000202468	0	0.000202468	0.46	12.4464
525.208	4.92	0.281	-1.055	2	0.1	0.213	2.50573	0.50573	0.000221751	0	0.000221751	0.46	12.4464
526.193	4.96	0.283	-1.055	2	0.1	0.213	2.5261	0.526101	0.000241034	0	0.000241034	0.46	12.4464
527.291	5.02	0.284	-1.055	2	0.1	0.213	2.55666	0.556659	0.000250675	0	0.000250675	0.46	12.4464
528.269	5.08	0.284	-1.055	2	0.1	0.213	2.58722	0.587217	0.000250675	0	0.000250675	0.455	12.3111
529.255	5.12	0.286	-1.055	2	0.1	0.213	2.60759	0.607588	0.000269958	0	0.000269958	0.455	12.3111
530.243	5.18	0.288	-1.055	2	0.1	0.213	2.63815	0.638146	0.00028924	0	0.00028924	0.455	12.3111
531.222	5.24	0.289	-1.055	2	0.1	0.213	2.6687	0.668704	0.000298882	0	0.000298882	0.455	12.3111
532.208	5.28	0.289	-1.055	2	0.1	0.213	2.68908	0.689076	0.000298882	0	0.000298882	0.455	12.3111
533.194	5.34	0.293	-1.055	2	0.1	0.213	2.71963	0.719633	0.000337447	0	0.000337447	0.455	12.3111
534.291	5.38	0.293	-1.055	2	0.1	0.213	2.74001	0.740005	0.000337447	0	0.000337447	0.455	12.3111
535.271	5.44	0.294	-1.055	2	0.1	0.213	2.77056	0.770563	0.000347088	0	0.000347088	0.455	12.3111
536.258	5.46	0.294	-1.055	2	0.1	0.213	2.78075	0.780749	0.000347088	0	0.000347088	0.45	12.1759
537.244	5.52	0.298	-1.055	2	0.1	0.213	2.81131	0.811306	0.000385654	0	0.000385654	0.45	12.1759
538.223	5.56	0.298	-1.055	2	0.1	0.213	2.83168	0.831678	0.000385654	0	0.000385654	0.45	12.1759
539.208	5.64	0.299	-1.055	2	0.1	0.213	2.87242	0.872422	0.000395295	0	0.000395295	0.45	12.1759
540.195	5.66	0.299	-1.055	2	0.1	0.213	2.88261	0.882608	0.000395295	0	0.000395295	0.45	12.1759
541.285	5.74	0.303	-1.056	2	0.1	0.213	2.92335	0.923351	0.00043386	-6.3662e-06	0.000421128	0.45	12.1759
542.27	5.76	0.303	-1.056	2	0.1	0.213	2.93354	0.933537	0.00043386	-6.3662e-06	0.000421128	0.45	12.1759
543.259	5.84	0.304	-1.056	2	0.1	0.213	2.97428	0.974281	0.000443502	-6.3662e-06	0.000430769	0.45	12.1759
544.24	5.86	0.304	-1.056	2	0.1	0.213	2.98447	0.984467	0.000443502	-6.3662e-06	0.000430769	0.45	12.1759
545.223	5.92	0.306	-1.056	2	0.1	0.213	3.01502	1.01502	0.000462784	-6.3662e-06	0.000450052	0.445	12.0406
546.208	5.96	0.308	-1.056	2	0.1	0.213	3.0354	1.0354	0.000482067	-6.3662e-06	0.000469335	0.445	12.0406
547.193	6.02	0.309	-1.056	2	0.1	0.213	3.06595	1.06595	0.000491708	-6.3662e-06	0.000478976	0.445	12.0406
548.287	6.06	0.309	-1.056	2	0.1	0.213	3.08633	1.08633	0.000491708	-6.3662e-06	0.000478976	0.445	12.0406
549.269	6.12	0.311	-1.056	2	0.1	0.213	3.11688	1.11688	0.000510991	-6.3662e-06	0.000498259	0.445	12.0406
550.258	6.18	0.313	-1.056	2	0.1	0.213	3.14744	1.14744	0.000530274	-6.3662e-06	0.000517541	0.445	12.0406
551.238	6.24	0.313	-1.056	2	0.1	0.213	3.178	1.178	0.000530274	-6.3662e-06	0.000517541	0.445	12.0406
552.224	6.26	0.314	-1.056	2	0.1	0.213	3.18818	1.18818	0.000539915	-6.3662e-06	0.000527183	0.445	12.0406
553.21	6.32	0.314	-1.056	2	0.1	0.213	3.21874	1.21874	0.000539915	-6.3662e-06	0.000527183	0.445	12.0406
554.193	6.36	0.316	-1.056	2	0.1	0.213	3.23911	1.23911	0.000559198	-6.3662e-06	0.000546465	0.44	11.9053
555.286	6.42	0.318	-1.056	2	0.1	0.213	3.26967	1.26967	0.000578481	-6.3662e-06	0.000565748	0.44	11.9053
556.269	6.48	0.32	-1.056	2	0.1	0.213	3.30023	1.30023	0.000597763	-6.3662e-06	0.000585031	0.44	11.9053
557.258	6.52	0.321	-1.056	2	0.1	0.213	3.3206	1.3206	0.000607405	-6.3662e-06	0.000594672	0.44	11.9053
558.244	6.56	0.321	-1.056	2	0.1	0.213	3.34097	1.34097	0.000607405	-6.3662e-06	0.000594672	0.44	11.9053
559.226	6.64	0.323	-1.056	2	0.1	0.213	3.38172	1.38172	0.000626687	-6.3662e-06	0.000613955	0.44	11.9053
560.208	6.66	0.325	-1.056	2	0.1	0.213	3.3919	1.3919	0.00064597	-6.3662e-06	0.000633238	0.44	11.9053
561.193	6.72	0.325	-1.056	2	0.1	0.213	3.42246	1.42246	0.00064597	-6.3662e-06	0.000633238	0.44	11.9053
562.285	6.76	0.326	-1.056	2	0.1	0.213	3.44283	1.44283	0.000655611	-6.3662e-06	0.000642879	0.44	11.9053
563.269	6.84	0.326	-1.056	2	0.1	0.213	3.48358	1.48358	0.000655611	-6.3662e-06	0.000642879	0.44	11.9053
564.258	6.86	0.328	-1.056	2	0.1	0.213	3.49376	1.49376	0.000674894	-6.3662e-06	0.000662162	0.44	11.9053
565.243	6.92	0.33	-1.056	2	0.1	0.213	3.52432	1.52432	0.000694177	-6.3662e-06	0.000681444	0.44	11.9053
566.224	6.96	0.33	-1.056	2	0.1	0.213	3.54469	1.54469	0.000694177	-6.3662e-06	0.000681444	0.44	11.9053
567.209	7.02	0.331	-1.056	2	0.1	0.213	3.57525	1.57525	0.000703818	-6.3662e-06	0.000691086	0.435	11.77
568.194	7.06	0.331	-1.056	2	0.1	0.213	3.59562	1.59562	0.000703818	-6.3662e-06	0.000691086	0.435	11.77
569.286	7.14	0.335	-1.056	2	0.1	0.213	3.63636	1.63636	0.000742383	-6.3662e-06	0.000729651	0.435	11.77
570.272	7.16	0.335	-1.056	2	0.1	0.213	3.64655	1.64655	0.000742383	-6.3662e-06	0.000729651	0.435	11.77
571.254	7.24	0.336	-1.056	2	0.1	0.213	3.68729	1.68729	0.000752025	-6.3662e-06	0.000739292	0.435	11.77
572.243	7.26	0.336	-1.056	2	0.1	0.213	3.69748	1.69748	0.000752025	-6.3662e-06	0.000739292	0.435	11.77
573.222	7.34	0.338	-1.056	2	0.1	0.213	3.73822	1.73822	0.000771307	-6.3662e-06	0.000758575	0.435	11.77
574.208	7.36	0.338	-1.056	2	0.1	0.213	3.74841	1.74841	0.000771307	-6.3662e-06	0.000758575	0.435	11.77
575.191	7.42	0.34	-1.056	2	0.1	0.213	3.77897	1.77897	0.00079059	-6.3662e-06	0.000777858	0.435	11.77
576.285	7.48	0.341	-1.056	2	0.1	0.213	3.80952	1.80952	0.000800231	-6.3662e-06	0.000787499	0.435	11.77
577.27	7.54	0.343	-1.056	2	0.1	0.213	3.84008	1.84008	0.000819514	-6.3662e-06	0.000806782	0.43	11.6347
578.254	7.58	0.343	-1.056	2	0.1	0.213	3.86045	1.86045	0.000819514	-6.3662e-06	0.000806782	0.43	11.6347
579.243	7.64	0.345	-1.056	2	0.1	0.213	3.89101	1.89101	0.000838797	-6.3662e-06	0.000826064	0.43	11.6347
580.223	7.66	0.345	-1.056	2	0.1	0.213	3.9012	1.9012	0.000838797	-6.3662e-06	0.000826064	0.43	11.6347
581.208	7.68	0.346	-1.056	2	0.1	0.213	3.91138	1.91138	0.000848438	-6.3662e-06	0.000835706	0.43	11.6347
582.194	7.68	0.346	-1.056	2	0.1	0.213	3.91138	1.91138	0.000848438	-6.3662e-06	0.000835706	0.43	11.6347
583.286	7.7	0.346	-1.056	2	0.1	0.213	3.92157	1.92157	0.000848438	-6.3662e-06	0.000835706	0.43	11.6347
584.269	7.68	0.346	-1.056	2	0.1	0.213	3.91138	1.91138	0.000848438	-6.3662e-06	0.000835706	0.43	11.6347
585.258	7.7	0.346	-1.056	2	0.1	0.213	3.92157	1.92157	0.000848438	-6.3662e-06	0.000835706	0.43	11.6347
586.238	7.7	0.346	-1.056	2	0.1	0.213	3.92157	1.92157	0.000848438	-6.3662e-06	0.000835706	0.43	11.6347
587.224	7.7	0.346	-1.056	2	0.1	0.213	3.92157	1.92157	0.000848438	-6.3662e-06	0.000835706	0.43	11.6347
588.208	7.7	0.346	-1.056	2	0.1	0.213	3.92157	1.92157	0.000848438	-6.3662e-06	0.000835706	0.43	11.6347
589.194	7.72	0.346	-1.056	2	0.1	0.213	3.93175	1.93175	0.000848438	-6.3662e-06	0.000835706	0.43	11.6347
590.291	7.72	0.348	-1.056	2	0.1	0.213	3.93175	1.93175	0.000867721	-6.3662e-06	0.000854988	0.43	11.6347
591.269	7.72	0.348	-1.056	2	0.1	0.213	3.93175	1.93175	0.000867721	-6.3662e-06	0.000854988	0.43	11.6347
592.259	7.72	0.348	-1.056	2	0.1	0.213	3.93175	1.93175	0.000867721	-6.3662e-06	0.000854988	0.43	11.6347
593.243	7.74	0.348	-1.056	2	0.1	0.213	3.94194	1.94194	0.000867721	-6.3662e-06	0.000854988	0.43	11.6347
594.222	7.74	0.348	-1.056	2	0.1	0.213	3.94194	1.94194	0.000867721	-6.3662e-06	0.000854988	0.43	11.6347
595.209	7.74	0.348	-1.056	2	0.1	0.213	3.94194	1.94194	0.000867721	-6.3662e-06	0.000854988	0.43	11.6347
596.196	7.74	0.346	-1.056	2	0.1	0.213	3.94194	1.94194	0.000848438	-6.3662e-06	0.000835706	0.43	11.6347
597.285	7.74	0.348	-1.056	2	0.1	0.213	3.94194	1.94194	0.000867721	-6.3662e-06	0.000854988	0.43	11.6347
598.269	7.74	0.348	-1.056	2	0.1	0.213	3.94194	1.94194	0.000867721	-6.3662e-06	0.000854988	0.43	11.6347
599.258	7.76	0.348	-1.056	2	0.1	0.213	3.95213	1.95213	0.000867721	-6.3662e-06	0.000854988	0.43	11.6347
600.238	7.76	0.348	-1.056	2	0.1	0.213	3.95213	1.95213	0.000867721	-6.3662e-06	0.000854988	0.425	11.4994
601.224	7.76	0.348	-1.056	2	0.1	0.213	3.95213	1.95213	0.000867721	-6.3662e-06	0.000854988	0.43	11.6347
602.208	7.76	0.348	-1.056	2	0.1	0.213	3.95213	1.95213	0.000867721	-6.3662e-06	0.000854988	0.43	11.6347
603.194	7.78	0.348	-1.056	2	0.1	0.213	3.96231	1.96231	0.000867721	-6.3662e-06	0.000854988	0.43	11.6347
604.285	7.78	0.35	-1.056	2	0.1	0.213	3.96231	1.96231	0.000887003	-6.3662e-06	0.000874271	0.43	11.6347
605.27	7.78	0.35	-1.056	2	0.1	0.213	3.96231	1.96231	0.000887003	-6.3662e-06	0.000874271	0.425	11.4994
606.258	7.78	0.35	-1.056	2	0.1	0.213	3.96231	1.96231	0.000887003	-6.3662e-06	0.000874271	0.425	11.4994
607.242	7.78	0.35	-1.056	2	0.1	0.213	3.96231	1.96231	0.000887003	-6.3662e-06	0.000874271	0.425	11.4994
608.224	7.78	0.35	-1.056	2	0.1	0.213	3.96231	1.96231	0.000887003	-6.3662e-06	0.000874271	0.425	11.4994
609.209	7.8	0.35	-1.056	2	0.1	0.213	3.9725	1.9725	0.000887003	-6.3662e-06	0.000874271	0.425	11.4994
610.191	7.8	0.35	-1.056	2	0.1	0.213	3.9725	1.9725	0.000887003	-6.3662e-06	0.000874271	0.425	11.4994
611.285	7.8	0.35	-1.056	2	0.1	0.213	3.9725	1.9725	0.000887003	-6.3662e-06	0.000874271	0.425	11.4994
612.269	7.8	0.35	-1.056	2	0.1	0.213	3.9725	1.9725	0.000887003	-6.3662e-06	0.000874271	0.425	11.4994
613.258	7.8	0.35	-1.056	2	0.1	0.213	3.9725	1.9725	0.000887003	-6.3662e-06	0.000874271	0.425	11.4994
614.243	7.8	0.35	-1.056	2	0.1	0.213	3.9725	1.9725	0.000887003	-6.3662e-06	0.000874271	0.425	11.4994
615.222	7.82	0.35	-1.056	2	0.1	0.213	3.98268	1.98268	0.000887003	-6.3662e-06	0.000874271	0.425	11.4994
616.208	7.82	0.35	-1.056	2	0.1	0.213	3.98268	1.98268	0.000887003	-6.3662e-06	0.000874271	0.425	11.4994
617.192	7.82	0.35	-1.056	2	0.1	0.213	3.98268	1.98268	0.000887003	-6.3662e-06	0.000874271	0.425	11.4994
618.286	7.82	0.35	-1.056	2	0.1	0.213	3.98268	1.98268	0.000887003	-6.3662e-06	0.000874271	0.425	11.4994
619.272	7.82	0.35	-1.056	2	0.1	0.213	3.98268	1.98268	0.000887003	-6.3662e-06	0.000874271	0.425	11.4994
620.259	7.82	0.351	-1.056	2	0.1	0.213	3.98268	1.98268	0.000896645	-6.3662e-06	0.000883912	0.425	11.4994
621.243	7.82	0.35	-1.056	2	0.1	0.213	3.98268	1.98268	0.000887003	-6.3662e-06	0.000874271	0.425	11.4994
622.222	7.82	0.35	-1.056	2	0.1	0.213	3.98268	1.98268	0.000887003	-6.3662e-06	0.000874271	0.425	11.4994
623.208	7.84	0.35	-1.056	2	0.1	0.213	3.99287	1.99287	0.000887003	-6.3662e-06	0.000874271	0.425	11.4994
624.195	7.84	0.351	-1.056	2	0.1	0.213	3.99287	1.99287	0.000896645	-6.3662e-06	0.000883912	0.425	11.4994
625.285	7.84	0.351	-1.056	2	0.1	0.213	3.99287	1.99287	0.000896645	-6.3662e-06	0.000883912	0.425	11.4994
626.269	7.84	0.351	-1.056	2	0.1	0.213	3.99287	1.99287	0.000896645	-6.3662e-06	0.000883912	0.425	11.4994
627.259	7.84	0.351	-1.056	2	0.1	0.213	3.99287	1.99287	0.000896645	-6.3662e-06	0.000883912	0.425	11.4994
628.244	7.84	0.35	-1.056	2	0.1	0.213	3.99287	1.99287	0.000887003	-6.3662e-06	0.000874271	0.425	11.4994
629.222	7.84	0.35	-1.056	2	0.1	0.213	3.99287	1.99287	0.000887003	-6.3662e-06	0.000874271	0.425	11.4994
630.208	7.84	0.351	-1.056	2	0.1	0.213	3.99287	1.99287	0.000896645	-6.3662e-06	0.000883912	0.425	11.4994
631.196	7.84	0.35	-1.056	2	0.1	0.213	3.99287	1.99287	0.000887003	-6.3662e-06	0.000874271	0.425	11.4994
632.285	7.84	0.35	-1.056	2	0.1	0.213	3.99287	1.99287	0.000887003	-6.3662e-06	0.000874271	0.425	11.4994
633.272	7.84	0.351	-1.056	2	0.1	0.213	3.99287	1.99287	0.000896645	-6.3662e-06	0.000883912	0.425	11.4994
634.253	7.84	0.351	-1.056	2	0.1	0.213	3.99287	1.99287	0.000896645	-6.3662e-06	0.000883912	0.425	11.4994
635.24	7.84	0.351	-1.056	2	0.1	0.213	3.99287	1.99287	0.000896645	-6.3662e-06	0.000883912	0.425	11.4994
636.222	7.84	0.351	-1.056	2	0.1	0.213	3.99287	1.99287	0.000896645	-6.3662e-06	0.000883912	0.425	11.4994
637.208	7.84	0.351	-1.056	2	0.1	0.213	3.99287	1.99287	0.000896645	-6.3662e-06	0.000883912	0.425	11.4994
638.193	7.84	0.351	-1.056	2	0.1	0.213	3.99287	1.99287	0.000896645	-6.3662e-06	0.000883912	0.425	11.4994
639.291	7.86	0.351	-1.056	2	0.1	0.213	4.00306	2.00306	0.000896645	-6.3662e-06	0.000883912	0.425	11.4994
640.269	7.84	0.351	-1.056	2	0.1	0.213	3.99287	1.99287	0.000896645	-6.3662e-06	0.000883912	0.425	11.4994
641.259	7.84	0.351	-1.056	2	0.1	0.213	3.99287	1.99287	0.000896645	-6.3662e-06	0.000883912	0.425	11.4994
642.238	7.84	0.351	-1.056	2	0.1	0.213	3.99287	1.99287	0.000896645	-6.3662e-06	0.000883912	0.425	11.4994
643.223	7.84	0.351	-1.056	2	0.1	0.213	3.99287	1.99287	0.000896645	-6.3662e-06	0.000883912	0.425	11.4994
644.207	7.84	0.351	-1.056	2	0.1	0.213	3.99287	1.99287	0.000896645	-6.3662e-06	0.000883912	0.425	11.4994
645.195	7.86	0.351	-1.056	2	0.1	0.213	4.00306	2.00306	0.000896645	-6.3662e-06	0.000883912	0.425	11.4994
646.29	7.86	0.351	-1.056	2	0.1	0.213	4.00306	2.00306	0.000896645	-6.3662e-06	0.000883912	0.425	11.4994
647.27	7.86	0.351	-1.056	2	0.1	0.213	4.00306	2.00306	0.000896645	-6.3662e-06	0.000883912	0.425	11.4994
648.253	7.86	0.351	-1.056	2	0.1	0.213	4.00306	2.00306	0.000896645	-6.3662e-06	0.000883912	0.425	11.4994
649.238	7.86	0.351	-1.056	2	0.1	0.213	4.00306	2.00306	0.000896645	-6.3662e-06	0.000883912	0.425	11.4994
650.223	7.86	0.351	-1.056	2	0.1	0.213	4.00306	2.00306	0.000896645	-6.3662e-06	0.000883912	0.425	11.4994
651.208	7.86	0.351	-1.056	2	0.1	0.213	4.00306	2.00306	0.000896645	-6.3662e-06	0.000883912	0.425	11.4994
652.193	7.86	0.351	-1.056	2	0.1	0.213	4.00306	2.00306	0.000896645	-6.3662e-06	0.000883912	0.425	11.4994
653.285	7.86	0.351	-1.056	2	0.1	0.213	4.00306	2.00306	0.000896645	-6.3662e-06	0.000883912	0.425	11.4994
654.27	7.86	0.351	-1.056	2	0.1	0.213	4.00306	2.00306	0.000896645	-6.3662e-06	0.000883912	0.425	11.4994
655.254	7.86	0.351	-1.056	2	0.1	0.213	4.00306	2.00306	0.000896645	-6.3662e-06	0.000883912	0.425	11.4994
656.244	7.84	0.351	-1.056	2	0.1	0.213	3.99287	1.99287	0.000896645	-6.3662e-06	0.000883912	0.425	11.4994
657.222	7.84	0.351	-1.056	2	0.1	0.213	3.99287	1.99287	0.000896645	-6.3662e-06	0.000883912	0.425	11.4994
658.208	7.84	0.353	-1.056	2	0.1	0.213	3.99287	1.99287	0.000915927	-6.3662e-06	0.000903195	0.425	11.4994
659.194	7.84	0.351	-1.056	2	0.1	0.213	3.99287	1.99287	0.000896645	-6.3662e-06	0.000883912	0.425	11.4994
660.29	7.84	0.351	-1.056	2	0.1	0.213	3.99287	1.99287	0.000896645	-6.3662e-06	0.000883912	0.425	11.4994
661.272	7.84	0.351	-1.056	2	0.1	0.213	3.99287	1.99287	0.000896645	-6.3662e-06	0.000883912	0.425	11.4994
662.254	7.84	0.353	-1.056	2	0.1	0.213	3.99287	1.99287	0.000915927	-6.3662e-06	0.000903195	0.425	11.4994
663.244	7.84	0.351	-1.056	2	0.1	0.213	3.99287	1.99287	0.000896645	-6.3662e-06	0.000883912	0.425	11.4994
664.226	7.84	0.351	-1.056	2	0.1	0.213	3.99287	1.99287	0.000896645	-6.3662e-06	0.000883912	0.425	11.4994
665.208	7.84	0.353	-1.056	2	0.1	0.213	3.99287	1.99287	0.000915927	-6.3662e-06	0.000903195	0.425	11.4994
666.194	7.84	0.353	-1.056	2	0.1	0.213	3.99287	1.99287	0.000915927	-6.3662e-06	0.000903195	0.425	11.4994
667.285	7.84	0.353	-1.056	2	0.1	0.213	3.99287	1.99287	0.000915927	-6.3662e-06	0.000903195	0.425	11.4994
668.269	7.84	0.351	-1.056	2	0.1	0.213	3.99287	1.99287	0.000896645	-6.3662e-06	0.000883912	0.425	11.4994
669.259	7.84	0.351	-1.056	2	0.1	0.213	3.99287	1.99287	0.000896645	-6.3662e-06	0.000883912	0.425	11.4994
670.244	7.84	0.351	-1.056	2	0.1	0.213	3.99287	1.99287	0.000896645	-6.3662e-06	0.000883912	0.425	11.4994
671.224	7.84	0.353	-1.056	2	0.1	0.213	3.99287	1.99287	0.000915927	-6.3662e-06	0.000903195	0.425	11.4994
672.208	7.84	0.353	-1.056	2	0.1	0.213	3.99287	1.99287	0.000915927	-6.3662e-06	0.000903195	0.425	11.4994
673.193	7.84	0.353	-1.056	2	0.1	0.213	3.99287	1.99287	0.000915927	-6.3662e-06	0.000903195	0.425	11.4994
674.291	7.84	0.353	-1.056	2	0.1	0.213	3.99287	1.99287	0.000915927	-6.3662e-06	0.000903195	0.425	11.4994
675.269	7.84	0.353	-1.056	2	0.1	0.213	3.99287	1.99287	0.000915927	-6.3662e-06	0.000903195	0.425	11.4994
676.254	7.84	0.351	-1.056	2	0.1	0.213	3.99287	1.99287	0.000896645	-6.3662e-06	0.000883912	0.425	11.4994
677.243	7.84	0.353	-1.056	2	0.1	0.213	3.99287	1.99287	0.000915927	-6.3662e-06	0.000903195	0.425	11.4994
678.222	7.84	0.353	-1.056	2	0.1	0.213	3.99287	1.99287	0.000915927	-6.3662e-06	0.000903195	0.425	11.4994
679.208	7.84	0.353	-1.056	2	0.1	0.213	3.99287	1.99287	0.000915927	-6.3662e-06	0.000903195	0.425	11.4994
680.196	7.84	0.353	-1.056	2	0.1	0.213	3.99287	1.99287	0.000915927	-6.3662e-06	0.000903195	0.425	11.4994
681.29	7.84	0.353	-1.056	2	0.1	0.213	3.99287	1.99287	0.000915927	-6.3662e-06	0.000903195	0.425	11.4994
682.272	7.84	0.353	-1.056	2	0.1	0.213	3.99287	1.99287	0.000915927	-6.3662e-06	0.000903195	0.425	11.4994
683.258	7.84	0.353	-1.056	2	0.1	0.213	3.99287	1.99287	0.000915927	-6.3662e-06	0.000903195	0.425	11.4994
684.243	7.84	0.353	-1.056	2	0.1	0.213	3.99287	1.99287	0.000915927	-6.3662e-06	0.000903195	0.425	11.4994
685.222	7.84	0.353	-1.056	2	0.1	0.213	3.99287	1.99287	0.000915927	-6.3662e-06	0.000903195	0.425	11.4994
686.208	7.86	0.353	-1.056	2	0.1	0.213	4.00306	2.00306	0.000915927	-6.3662e-06	0.000903195	0.425	11.4994
687.194	7.86	0.353	-1.056	2	0.1	0.213	4.00306	2.00306	0.000915927	-6.3662e-06	0.000903195	0.425	11.4994
688.285	7.84	0.353	-1.056	2	0.1	0.213	3.99287	1.99287	0.000915927	-6.3662e-06	0.000903195	0.425	11.4994
689.269	7.84	0.353	-1.056	2	0.1	0.213	3.99287	1.99287	0.000915927	-6.3662e-06	0.000903195	0.425	11.4994
690.258	7.84	0.353	-1.056	2	0.1	0.213	3.99287	1.99287	0.000915927	-6.3662e-06	0.000903195	0.425	11.4994
691.243	7.84	0.353	-1.056	2	0.1	0.213	3.99287	1.99287	0.000915927	-6.3662e-06	0.000903195	0.425	11.4994
692.223	7.84	0.353	-1.056	2	0.1	0.213	3.99287	1.99287	0.000915927	-6.3662e-06	0.000903195	0.425	11.4994
693.208	7.84	0.353	-1.056	2	0.1	0.213	3.99287	1.99287	0.000915927	-6.3662e-06	0.000903195	0.425	11.4994
694.194	7.84	0.353	-1.056	2	0.1	0.213	3.99287	1.99287	0.000915927	-6.3662e-06	0.000903195	0.425	11.4994
695.291	7.84	0.353	-1.056	2	0.1	0.213	3.99287	1.99287	0.000915927	-6.3662e-06	0.000903195	0.425	11.4994
696.269	7.84	0.353	-1.056	2	0.1	0.213	3.99287	1.99287	0.000915927	-6.3662e-06	0.000903195	0.425	11.4994
697.258	7.84	0.353	-1.056	2	0.1	0.213	3.99287	1.99287	0.000915927	-6.3662e-06	0.000903195	0.425	11.4994
698.243	7.84	0.353	-1.056	2	0.1	0.213	3.99287	1.99287	0.000915927	-6.3662e-06	0.000903195	0.425	11.4994
699.226	7.86	0.353	-1.056	2	0.1	0.213	4.00306	2.00306	0.000915927	-6.3662e-06	0.000903195	0.425	11.4994
700.209	7.84	0.353	-1.056	2	0.1	0.213	3.99287	1.99287	0.000915927	-6.3662e-06	0.000903195	0.425	11.4994
701.194	7.84	0.353	-1.056	2	0.1	0.213	3.99287	1.99287	0.000915927	-6.3662e-06	0.000903195	0.425	11.4994
702.286	7.84	0.353	-1.056	2	0.1	0.213	3.99287	1.99287	0.000915927	-6.3662e-06	0.000903195	0.425	11.4994
703.272	7.84	0.353	-1.056	2	0.1	0.213	3.99287	1.99287	0.000915927	-6.3662e-06	0.000903195	0.425	11.4994
704.255	7.84	0.353	-1.056	2	0.1	0.213	3.99287	1.99287	0.000915927	-6.3662e-06	0.000903195	0.425	11.4994
705.244	7.86	0.353	-1.056	2	0.1	0.213	4.00306	2.00306	0.000915927	-6.3662e-06	0.000903195	0.425	11.4994
706.223	7.86	0.353	-1.056	2	0.1	0.213	4.00306	2.00306	0.000915927	-6.3662e-06	0.000903195	0.425	11.4994
707.208	7.86	0.353	-1.056	2	0.1	0.213	4.00306	2.00306	0.000915927	-6.3662e-06	0.000903195	0.425	11.4994
708.192	7.86	0.353	-1.056	2	0.1	0.213	4.00306	2.00306	0.000915927	-6.3662e-06	0.000903195	0.425	11.4994
709.285	7.86	0.353	-1.056	2	0.1	0.213	4.00306	2.00306	0.000915927	-6.3662e-06	0.000903195	0.425	11.4994
710.27	7.84	0.353	-1.056	2	0.1	0.213	3.99287	1.99287	0.000915927	-6.3662e-06	0.000903195	0.425	11.4994
711.258	7.84	0.353	-1.056	2	0.1	0.213	3.99287	1.99287	0.000915927	-6.3662e-06	0.000903195	0.425	11.4994
712.244	7.84	0.353	-1.056	2	0.1	0.213	3.99287	1.99287	0.000915927	-6.3662e-06	0.000903195	0.425	11.4994
713.222	7.84	0.353	-1.056	2	0.1	0.213	3.99287	1.99287	0.000915927	-6.3662e-06	0.000903195	0.425	11.4994
714.207	7.84	0.353	-1.056	2	0.1	0.213	3.99287	1.99287	0.000915927	-6.3662e-06	0.000903195	0.425	11.4994
715.197	7.84	0.353	-1.056	2	0.1	0.213	3.99287	1.99287	0.000915927	-6.3662e-06	0.000903195	0.425	11.4994
716.29	7.84	0.353	-1.056	2	0.1	0.213	3.99287	1.99287	0.000915927	-6.3662e-06	0.000903195	0.425	11.4994
717.272	7.84	0.353	-1.056	2	0.1	0.213	3.99287	1.99287	0.000915927	-6.3662e-06	0.000903195	0.425	11.4994
718.254	7.84	0.353	-1.056	2	0.1	0.213	3.99287	1.99287	0.000915927	-6.3662e-06	0.000903195	0.425	11.4994
719.244	7.84	0.353	-1.056	2	0.1	0.213	3.99287	1.99287	0.000915927	-6.3662e-06	0.000903195	0.425	11.4994
720.222	7.84	0.353	-1.056	2	0.1	0.213	3.99287	1.99287	0.000915927	-6.3662e-06	0.000903195	0.425	11.4994
721.208	7.84	0.353	-1.056	2	0.1	0.213	3.99287	1.99287	0.000915927	-6.3662e-06	0.000903195	0.425	11.4994
722.194	7.84	0.353	-1.056	2	0.1	0.213	3.99287	1.99287	0.000915927	-6.3662e-06	0.000903195	0.425	11.4994
723.285	7.84	0.353	-1.056	2	0.1	0.213	3.99287	1.99287	0.000915927	-6.3662e-06	0.000903195	0.425	11.4994
724.271	7.84	0.353	-1.056	2	0.1	0.213	3.99287	1.99287	0.000915927	-6.3662e-06	0.000903195	0.425	11.4994
725.259	7.86	0.353	-1.056	2	0.1	0.213	4.00306	2.00306	0.000915927	-6.3662e-06	0.000903195	0.425	11.4994
726.238	7.86	0.353	-1.056	2	0.1	0.213	4.00306	2.00306	0.000915927	-6.3662e-06	0.000903195	0.425	11.4994
727.222	7.86	0.353	-1.056	2	0.1	0.213	4.00306	2.00306	0.000915927	-6.3662e-06	0.000903195	0.425	11.4994
728.21	7.86	0.353	-1.056	2	0.1	0.213	4.00306	2.00306	0.000915927	-6.3662e-06	0.000903195	0.425	11.4994
729.193	7.84	0.353	-1.056	2	0.1	0.213	3.99287	1.99287	0.000915927	-6.3662e-06	0.000903195	0.425	11.4994
730.285	7.84	0.353	-1.056	2	0.1	0.213	3.99287	1.99287	0.000915927	-6.3662e-06	0.000903195	0.425	11.4994
731.269	7.84	0.353	-1.056	2	0.1	0.213	3.99287	1.99287	0.000915927	-6.3662e-06	0.000903195	0.425	11.4994
732.259	7.84	0.353	-1.056	2	0.1	0.213	3.99287	1.99287	0.000915927	-6.3662e-06	0.000903195	0.425	11.4994
733.238	7.84	0.353	-1.056	2	0.1	0.213	3.99287	1.99287	0.000915927	-6.3662e-06	0.000903195	0.425	11.4994
734.223	7.84	0.353	-1.056	2	0.1	0.213	3.99287	1.99287	0.000915927	-6.3662e-06	0.000903195	0.425	11.4994
735.21	7.84	0.353	-1.056	2	0.1	0.213	3.99287	1.99287	0.000915927	-6.3662e-06	0.000903195	0.425	11.4994
736.196	7.84	0.353	-1.056	2	0.1	0.213	3.99287	1.99287	0.000915927	-6.3662e-06	0.000903195	0.425	11.4994
737.29	7.84	0.353	-1.056	2.015	0.1	0.213	3.99287	1.97787	0.000915927	-6.3662e-06	0.000903195	0.425	11.4994
738.269	7.84	0.353	-1.056	2.05	0.1	0.213	3.99287	1.94287	0.000915927	-6.3662e-06	0.000903195	0.425	11.4994
739.259	7.84	0.353	-1.055	2.06	0.1	0.213	3.99287	1.93287	0.000915927	0	0.000915927	0.42	11.3641
740.24	7.84	0.353	-1.055	2.1	0.1	0.213	3.99287	1.89287	0.000915927	0	0.000915927	0.42	11.3641
741.222	7.84	0.353	-1.054	2.165	0.1	0.213	3.99287	1.82787	0.000915927	6.3662e-06	0.00092866	0.415	11.2288
742.208	7.84	0.353	-1.054	2.225	0.1	0.213	3.99287	1.76787	0.000915927	6.3662e-06	0.00092866	0.415	11.2288
743.193	7.86	0.353	-1.053	2.295	0.1	0.213	4.00306	1.70806	0.000915927	1.27324e-05	0.000941392	0.41	11.0936
744.291	7.84	0.355	-1.051	2.36	0.1	0.213	3.99287	1.63287	0.00093521	2.54648e-05	0.00098614	0.405	10.9583
745.27	7.86	0.353	-1.049	2.41	0.1	0.213	4.00306	1.59306	0.000915927	3.81972e-05	0.000992322	0.4	10.823
746.253	7.84	0.355	-1.047	2.46	0.1	0.213	3.99287	1.53287	0.00093521	5.09296e-05	0.00103707	0.39	10.5524
747.239	7.84	0.355	-1.044	2.515	0.1	0.213	3.99287	1.47787	0.00093521	7.00282e-05	0.00107527	0.38	10.2818
748.224	7.84	0.355	-1.042	2.57	0.1	0.213	3.99287	1.42287	0.00093521	8.27606e-05	0.00110073	0.38	10.2818
749.209	7.86	0.353	-1.04	2.615	0.1	0.213	4.00306	1.38806	0.000915927	9.5493e-05	0.00110691	0.375	10.1465
750.197	7.84	0.355	-1.039	2.665	0.1	0.213	3.99287	1.32787	0.00093521	0.000101859	0.00113893	0.36	9.74069
751.291	7.84	0.355	-1.037	2.715	0.1	0.213	3.99287	1.27787	0.00093521	0.000114592	0.00116439	0.355	9.6054
752.272	7.84	0.355	-1.036	2.76	0.1	0.213	3.99287	1.23287	0.00093521	0.000120958	0.00117713	0.35	9.47011
753.258	7.84	0.355	-1.034	2.81	0.1	0.213	3.99287	1.18287	0.00093521	0.00013369	0.00120259	0.345	9.33483
754.243	7.84	0.355	-1.032	2.85	0.1	0.213	3.99287	1.14287	0.00093521	0.000146423	0.00122806	0.34	9.19954
755.223	7.84	0.355	-1.031	2.905	0.1	0.213	3.99287	1.08787	0.00093521	0.000152789	0.00124079	0.335	9.06425
756.209	7.84	0.355	-1.029	2.95	0.1	0.213	3.99287	1.04287	0.00093521	0.000165521	0.00126625	0.335	9.06425
757.193	7.84	0.355	-1.027	3	0.1	0.213	3.99287	0.99287	0.00093521	0.000178254	0.00129172	0.325	8.79368
758.285	7.86	0.355	-1.025	3.055	0.1	0.213	4.00306	0.948056	0.00093521	0.000190986	0.00131718	0.32	8.65839
759.269	7.84	0.355	-1.023	3.1	0.1	0.213	3.99287	0.89287	0.00093521	0.000203718	0.00134265	0.32	8.65839
760.253	7.86	0.355	-1.021	3.155	0.1	0.213	4.00306	0.848056	0.00093521	0.000216451	0.00136811	0.31	8.38781
761.24	7.84	0.355	-1.019	3.2	0.1	0.213	3.99287	0.79287	0.00093521	0.000229183	0.00139358	0.31	8.38781
762.222	7.84	0.355	-1.016	3.26	0.1	0.213	3.99287	0.73287	0.00093521	0.000248282	0.00143177	0.305	8.25253
763.208	7.84	0.355	-1.014	3.3	0.1	0.213	3.99287	0.69287	0.00093521	0.000261014	0.00145724	0.3	8.11724
764.193	7.84	0.355	-1.012	3.36	0.1	0.213	3.99287	0.63287	0.00093521	0.000273747	0.0014827	0.295	7.98195
765.29	7.86	0.355	-1.009	3.41	0.1	0.213	4.00306	0.593056	0.00093521	0.000292845	0.0015209	0.29	7.84667
766.269	7.86	0.355	-1.007	3.46	0.1	0.213	4.00306	0.543056	0.00093521	0.000305577	0.00154637	0.285	7.71138
767.259	7.84	0.355	-1.005	3.5	0.1	0.213	3.99287	0.49287	0.00093521	0.00031831	0.00157183	0.28	7.57609
768.244	7.84	0.355	-1.002	3.55	0.1	0.213	3.99287	0.44287	0.00093521	0.000337408	0.00161003	0.275	7.4408
769.226	7.84	0.355	-1	3.605	0.1	0.213	3.99287	0.38787	0.00093521	0.000350141	0.00163549	0.27	7.30552
770.208	7.84	0.355	-0.998	3.655	0.1	0.213	3.99287	0.33787	0.00093521	0.000362873	0.00166096	0.265	7.17023
771.196	7.86	0.355	-0.995	3.705	0.1	0.213	4.00306	0.298056	0.00093521	0.000381972	0.00169915	0.26	7.03494
772.29	7.86	0.355	-0.992	3.76	0.1	0.213	4.00306	0.243056	0.00093521	0.00040107	0.00173735	0.255	6.89965
773.272	7.86	0.355	-0.99	3.805	0.1	0.213	4.00306	0.198056	0.00093521	0.000413803	0.00176282	0.255	6.89965
774.255	7.86	0.355	-0.987	3.86	0.1	0.213	4.00306	0.143056	0.00093521	0.000432901	0.00180101	0.25	6.76437
775.243	7.86	0.355	-0.985	3.91	0.1	0.213	4.00306	0.0930558	0.00093521	0.000445634	0.00182648	0.245	6.62908
776.223	7.86	0.355	-0.982	3.955	0.1	0.213	4.00306	0.0480558	0.00093521	0.000464732	0.00186468	0.24	6.49379
777.208	7.86	0.355	-0.979	4.005	0.1	0.213	4.00306	-0.00194423	0.00093521	0.000483831	0.00190287	0.24	6.49379
778.194	7.86	0.355	-0.977	4.06	0.1	0.213	4.00306	-0.0569442	0.00093521	0.000496563	0.00192834	0.235	6.3585
779.285	7.88	0.355	-0.974	4.11	0.1	0.213	4.01324	-0.0967583	0.00093521	0.000515662	0.00196653	0.23	6.22322
780.27	7.88	0.355	-0.972	4.16	0.1	0.213	4.01324	-0.146758	0.00093521	0.000528394	0.001992	0.225	6.08793
781.254	7.88	0.355	-0.969	4.205	0.1	0.213	4.01324	-0.191758	0.00093521	0.000547493	0.0020302	0.225	6.08793
782.24	7.88	0.355	-0.967	4.255	0.1	0.213	4.01324	-0.241758	0.00093521	0.000560225	0.00205566	0.22	5.95264
783.224	7.88	0.355	-0.964	4.305	0.1	0.213	4.01324	-0.291758	0.00093521	0.000579324	0.00209386	0.215	5.81736
784.209	7.88	0.355	-0.962	4.355	0.1	0.213	4.01324	-0.341758	0.00093521	0.000592056	0.00211932	0.215	5.81736
785.196	7.86	0.355	-0.959	4.4	0.1	0.213	4.00306	-0.396944	0.00093521	0.000611155	0.00215752	0.21	5.68207
786.285	7.86	0.355	-0.956	4.465	0.1	0.213	4.00306	-0.461944	0.00093521	0.000630254	0.00219572	0.205	5.54678
787.269	7.86	0.353	-0.953	4.505	0.1	0.213	4.00306	-0.501944	0.000915927	0.000649352	0.00221463	0.205	5.54678
788.258	7.86	0.353	-0.95	4.56	0.1	0.213	4.00306	-0.556944	0.000915927	0.000668451	0.00225283	0.205	5.54678
789.244	7.86	0.353	-0.948	4.6	0.1	0.213	4.00306	-0.596944	0.000915927	0.000681183	0.00227829	0.2	5.41149
790.222	7.86	0.353	-0.946	4.655	0.1	0.213	4.00306	-0.651944	0.000915927	0.000693916	0.00230376	0.195	5.27621
791.208	7.84	0.353	-0.943	4.695	0.1	0.213	3.99287	-0.70213	0.000915927	0.000713014	0.00234196	0.195	5.27621
792.193	7.84	0.353	-0.941	4.715	0.1	0.213	3.99287	-0.72213	0.000915927	0.000725747	0.00236742	0.19	5.14092
793.285	7.82	0.353	-0.938	4.815	0.1	0.213	3.98268	-0.832316	0.000915927	0.000744845	0.00240562	0.19	5.14092
794.27	7.82	0.353	-0.935	4.865	0.1	0.213	3.98268	-0.882316	0.000915927	0.000763944	0.00244381	0.185	5.00563
795.254	7.82	0.353	-0.932	4.915	0.1	0.213	3.98268	-0.932316	0.000915927	0.000783042	0.00248201	0.185	5.00563
796.243	7.82	0.351	-0.929	4.96	0.1	0.213	3.98268	-0.977316	0.000896645	0.000802141	0.00250093	0.18	4.87034
797.226	7.82	0.351	-0.926	5.005	0.1	0.213	3.98268	-1.02232	0.000896645	0.00082124	0.00253912	0.175	4.73506
798.208	7.82	0.351	-0.924	5.055	0.1	0.213	3.98268	-1.07232	0.000896645	0.000833972	0.00256459	0.175	4.73506
799.192	7.82	0.351	-0.922	5.1	0.1	0.213	3.98268	-1.11732	0.000896645	0.000846704	0.00259005	0.17	4.59977
800.291	7.84	0.351	-0.92	5.16	0.1	0.213	3.99287	-1.16713	0.000896645	0.000859437	0.00261552	0.165	4.46448
801.269	7.84	0.351	-0.917	5.205	0.1	0.213	3.99287	-1.21213	0.000896645	0.000878535	0.00265372	0.165	4.46448
802.258	7.84	0.351	-0.914	5.26	0.1	0.213	3.99287	-1.26713	0.000896645	0.000897634	0.00269191	0.165	4.46448
803.243	7.84	0.351	-0.912	5.3	0.1	0.213	3.99287	-1.30713	0.000896645	0.000910366	0.00271738	0.16	4.32919
804.226	7.84	0.351	-0.909	5.36	0.1	0.213	3.99287	-1.36713	0.000896645	0.000929465	0.00275557	0.16	4.32919
805.208	7.84	0.35	-0.907	5.405	0.1	0.213	3.99287	-1.41213	0.000887003	0.000942197	0.0027714	0.155	4.19391
806.196	7.84	0.35	-0.904	5.465	0.1	0.213	3.99287	-1.47213	0.000887003	0.000961296	0.0028096	0.155	4.19391
807.285	7.84	0.35	-0.901	5.51	0.1	0.213	3.99287	-1.51713	0.000887003	0.000980394	0.00284779	0.155	4.19391
808.27	7.84	0.35	-0.899	5.555	0.1	0.213	3.99287	-1.56213	0.000887003	0.000993127	0.00287326	0.15	4.05862
809.253	7.84	0.35	-0.896	5.605	0.1	0.213	3.99287	-1.61213	0.000887003	0.00101223	0.00291145	0.15	4.05862
810.243	7.84	0.35	-0.894	5.655	0.1	0.213	3.99287	-1.66213	0.000887003	0.00102496	0.00293692	0.145	3.92333
811.222	7.86	0.35	-0.891	5.71	0.1	0.213	4.00306	-1.70694	0.000887003	0.00104406	0.00297512	0.145	3.92333
812.208	7.86	0.35	-0.889	5.755	0.1	0.213	4.00306	-1.75194	0.000887003	0.00105679	0.00300058	0.14	3.78805
813.194	7.86	0.348	-0.886	5.8	0.1	0.213	4.00306	-1.79694	0.000867721	0.00107589	0.0030195	0.14	3.78805
814.291	7.86	0.35	-0.884	5.86	0.1	0.213	4.00306	-1.85694	0.000887003	0.00108862	0.00306424	0.135	3.65276
815.272	7.86	0.348	-0.881	5.905	0.1	0.213	4.00306	-1.90194	0.000867721	0.00110772	0.00308316	0.135	3.65276
816.259	7.86	0.348	-0.878	5.96	0.1	0.213	4.00306	-1.95694	0.000867721	0.00112682	0.00312135	0.135	3.65276
817.244	7.86	0.346	-0.875	6	0.1	0.213	4.00306	-1.99694	0.000848438	0.00114592	0.00314027	0.13	3.51747
818.224	7.86	0.346	-0.872	6.065	0.1	0.213	4.00306	-2.06194	0.000848438	0.00116501	0.00317847	0.13	3.51747
819.208	7.86	0.346	-0.87	6.1	0.1	0.213	4.00306	-2.09694	0.000848438	0.00117775	0.00320393	0.13	3.51747
820.195	7.86	0.346	-0.867	6.155	0.1	0.213	4.00306	-2.15194	0.000848438	0.00119685	0.00324213	0.13	3.51747
821.285	7.86	0.346	-0.864	6.21	0.1	0.213	4.00306	-2.20694	0.000848438	0.00121594	0.00328033	0.125	3.38218
822.269	7.86	0.345	-0.862	6.26	0.1	0.213	4.00306	-2.25694	0.000838797	0.00122868	0.00329615	0.125	3.38218
823.258	7.84	0.345	-0.86	6.305	0.1	0.213	3.99287	-2.31213	0.000838797	0.00124141	0.00332161	0.125	3.38218
824.238	7.86	0.345	-0.858	6.355	0.1	0.213	4.00306	-2.35194	0.000838797	0.00125414	0.00334708	0.125	3.38218
825.223	7.86	0.345	-0.855	6.4	0.1	0.213	4.00306	-2.39694	0.000838797	0.00127324	0.00338528	0.12	3.2469
826.21	7.86	0.345	-0.853	6.455	0.1	0.213	4.00306	-2.45194	0.000838797	0.00128597	0.00341074	0.12	3.2469
827.193	7.86	0.343	-0.85	6.505	0.1	0.213	4.00306	-2.50194	0.000819514	0.00130507	0.00342966	0.115	3.11161
828.288	7.86	0.343	-0.848	6.565	0.1	0.213	4.00306	-2.56194	0.000819514	0.0013178	0.00345512	0.115	3.11161
829.269	7.86	0.343	-0.846	6.6	0.1	0.213	4.00306	-2.59694	0.000819514	0.00133054	0.00348058	0.115	3.11161
830.253	7.86	0.341	-0.843	6.66	0.1	0.213	4.00306	-2.65694	0.000800231	0.00134963	0.0034995	0.115	3.11161
831.243	7.86	0.341	-0.841	6.7	0.1	0.213	4.00306	-2.69694	0.000800231	0.00136237	0.00352496	0.11	2.97632
832.223	7.88	0.341	-0.838	6.76	0.1	0.213	4.01324	-2.74676	0.000800231	0.00138146	0.00356316	0.11	2.97632
833.207	7.86	0.34	-0.836	6.8	0.1	0.213	4.00306	-2.79694	0.00079059	0.0013942	0.00357898	0.11	2.97632
834.196	7.86	0.34	-0.834	6.86	0.1	0.213	4.00306	-2.85694	0.00079059	0.00140693	0.00360445	0.105	2.84103
835.29	7.86	0.34	-0.831	6.905	0.1	0.213	4.00306	-2.90194	0.00079059	0.00142603	0.00364265	0.105	2.84103
836.27	7.86	0.338	-0.829	6.96	0.1	0.213	4.00306	-2.95694	0.000771307	0.00143876	0.00364883	0.105	2.84103
837.259	7.86	0.338	-0.826	7.005	0.1	0.213	4.00306	-3.00194	0.000771307	0.00145786	0.00368703	0.1	2.70575
838.239	7.86	0.336	-0.824	7.055	0.1	0.213	4.00306	-3.05194	0.000752025	0.00147059	0.00369321	0.1	2.70575
839.222	7.86	0.335	-0.822	7.105	0.1	0.213	4.00306	-3.10194	0.000742383	0.00148332	0.00370903	0.1	2.70575
840.208	7.88	0.335	-0.82	7.155	0.1	0.213	4.01324	-3.14176	0.000742383	0.00149606	0.0037345	0.1	2.70575
841.195	7.88	0.333	-0.817	7.2	0.1	0.213	4.01324	-3.18676	0.000723101	0.00151516	0.00375341	0.1	2.70575
842.291	7.88	0.333	-0.814	7.26	0.1	0.213	4.01324	-3.24676	0.000723101	0.00153425	0.00379161	0.1	2.70575
843.272	7.88	0.331	-0.812	7.305	0.1	0.213	4.01324	-3.29176	0.000703818	0.00154699	0.00379779	0.095	2.57046
844.255	7.88	0.33	-0.809	7.355	0.1	0.213	4.01324	-3.34176	0.000694177	0.00156608	0.00382635	0.095	2.57046
845.24	7.86	0.33	-0.807	7.4	0.1	0.213	4.00306	-3.39694	0.000694177	0.00157882	0.00385181	0.095	2.57046
846.223	7.86	0.328	-0.804	7.46	0.1	0.213	4.00306	-3.45694	0.000674894	0.00159792	0.00387073	0.095	2.57046
847.208	7.88	0.326	-0.802	7.5	0.1	0.213	4.01324	-3.48676	0.000655611	0.00161065	0.00387691	0.09	2.43517
848.196	7.9	0.325	-0.799	7.56	0.1	0.213	4.02343	-3.53657	0.00064597	0.00162975	0.00390546	0.09	2.43517
849.291	7.92	0.323	-0.797	7.61	0.1	0.213	4.03361	-3.57639	0.000626687	0.00164248	0.00391165	0.09	2.43517
850.269	7.96	0.32	-0.795	7.665	0.1	0.213	4.05399	-3.61101	0.000597763	0.00165521	0.00390819	0.09	2.43517
851.254	7.96	0.314	-0.792	7.705	0.1	0.213	4.05399	-3.65101	0.000539915	0.00167431	0.00388854	0.09	2.43517
852.244	7.98	0.311	-0.791	7.755	0.1	0.213	4.06417	-3.69083	0.000510991	0.00168068	0.00387234	0.085	2.29988
853.223	7.98	0.304	-0.788	7.8	0.1	0.213	4.06417	-3.73583	0.000443502	0.00169977	0.00384305	0.085	2.29988
854.208	8	0.298	-0.786	7.855	0.1	0.213	4.07436	-3.78064	0.000385654	0.00171251	0.00381067	0.085	2.29988
855.197	7.98	0.288	-0.784	7.9	0.1	0.213	4.06417	-3.83583	0.00028924	0.00172524	0.00373972	0.085	2.29988
856.285	7.98	0.278	-0.782	7.955	0.1	0.213	4.06417	-3.89083	0.000192827	0.00173797	0.00366877	0.085	2.29988
857.27	7.98	0.264	-0.779	8.01	0.1	0.213	4.06417	-3.94583	5.78481e-05	0.00175707	0.00357199	0.085	2.29988
858.254	7.98	0.253	-0.777	8.06	0.1	0.213	4.06417	-3.99583	-4.82067e-05	0.0017698	0.0034914	0.08	2.1646
859.243	7.98	0.236	-0.775	8.1	0.1	0.213	4.06417	-4.03583	-0.00021211	0.00178254	0.00335296	0.08	2.1646
860.223	7.84	0.228	-0.772	8.165	0.1	0.213	3.99287	-4.17213	-0.00028924	0.00180163	0.00331403	0.08	2.1646
861.207	7.76	0.222	-0.769	8.2	0.1	0.213	3.95213	-4.24787	-0.000347088	0.00182073	0.00329438	0.08	2.1646
862.194	7.72	0.219	-0.766	8.25	0.1	0.213	3.93175	-4.31825	-0.000376012	0.00183983	0.00330365	0.08	2.1646
863.285	7.7	0.216	-0.763	8.305	0.1	0.213	3.92157	-4.38343	-0.000404936	0.00185893	0.00331292	0.08	2.1646
864.27	7.7	0.214	-0.76	8.36	0.1	0.213	3.92157	-4.43843	-0.000424219	0.00187803	0.00333184	0.08	2.1646
865.254	7.7	0.212	-0.757	8.405	0.1	0.213	3.92157	-4.48343	-0.000443502	0.00189713	0.00335075	0.075	2.02931
866.24	7.7	0.211	-0.755	8.45	0.1	0.213	3.92157	-4.52843	-0.000453143	0.00190986	0.00336658	0.075	2.02931
867.224	7.68	0.211	-0.753	8.37	0.1	0.213	3.91138	-4.45862	-0.000453143	0.00192259	0.00339204	0.075	2.02931
868.209	7.68	0.209	-0.752	8.295	0.1	0.213	3.91138	-4.38362	-0.000472426	0.00192896	0.00338549	0.075	2.02931
869.194	7.68	0.211	-0.752	8.315	0.1	0.213	3.91138	-4.40362	-0.000453143	0.00192896	0.00340477	0.075	2.02931
870.285	7.7	0.211	-0.751	8.37	0.1	0.213	3.92157	-4.44843	-0.000453143	0.00193532	0.00341751	0.075	2.02931
871.269	7.72	0.211	-0.751	8.39	0.1	0.213	3.93175	-4.45825	-0.000453143	0.00193532	0.00341751	0.075	2.02931
872.253	7.74	0.211	-0.75	8.42	0.1	0.213	3.94194	-4.47806	-0.000453143	0.00194169	0.00343024	0.075	2.02931
873.244	7.76	0.211	-0.749	8.425	0.1	0.213	3.95213	-4.47287	-0.000453143	0.00194806	0.00344297	0.075	2.02931
874.223	7.78	0.211	-0.748	8.44	0.1	0.213	3.96231	-4.47769	-0.000453143	0.00195442	0.0034557	0.075	2.02931
875.207	7.8	0.211	-0.748	8.45	0.1	0.213	3.9725	-4.4775	-0.000453143	0.00195442	0.0034557	0.075	2.02931
876.196	7.82	0.211	-0.747	8.47	0.1	0.213	3.98268	-4.48732	-0.000453143	0.00196079	0.00346843	0.075	2.02931
877.285	7.84	0.211	-0.747	8.47	0.1	0.213	3.99287	-4.47713	-0.000453143	0.00196079	0.00346843	0.075	2.02931
878.269	7.84	0.211	-0.746	8.49	0.1	0.213	3.99287	-4.49713	-0.000453143	0.00196716	0.00348117	0.075	2.02931
879.255	7.84	0.211	-0.745	8.495	0.1	0.213	3.99287	-4.50213	-0.000453143	0.00197352	0.0034939	0.07	1.89402
880.241	7.86	0.211	-0.745	8.505	0.1	0.213	4.00306	-4.50194	-0.000453143	0.00197352	0.0034939	0.07	1.89402
881.224	7.86	0.211	-0.744	8.51	0.1	0.213	4.00306	-4.50694	-0.000453143	0.00197989	0.00350663	0.07	1.89402
882.208	7.86	0.211	-0.744	8.52	0.1	0.213	4.00306	-4.51694	-0.000453143	0.00197989	0.00350663	0.07	1.89402
883.193	7.86	0.211	-0.743	8.52	0.1	0.213	4.00306	-4.51694	-0.000453143	0.00198625	0.00351936	0.07	1.89402
884.285	7.88	0.211	-0.743	8.535	0.1	0.213	4.01324	-4.52176	-0.000453143	0.00198625	0.00351936	0.07	1.89402
885.269	7.88	0.211	-0.742	8.54	0.1	0.213	4.01324	-4.52676	-0.000453143	0.00199262	0.0035321	0.07	1.89402
886.254	7.88	0.211	-0.742	8.545	0.1	0.213	4.01324	-4.53176	-0.000453143	0.00199262	0.0035321	0.07	1.89402
887.243	7.88	0.211	-0.742	8.55	0.1	0.213	4.01324	-4.53676	-0.000453143	0.00199262	0.0035321	0.07	1.89402
888.222	7.88	0.211	-0.741	8.56	0.1	0.213	4.01324	-4.54676	-0.000453143	0.00199899	0.00354483	0.07	1.89402
889.208	7.88	0.211	-0.741	8.555	0.1	0.213	4.01324	-4.54176	-0.000453143	0.00199899	0.00354483	0.07	1.89402
890.193	7.88	0.211	-0.74	8.57	0.1	0.213	4.01324	-4.55676	-0.000453143	0.00200535	0.00355756	0.07	1.89402
891.285	7.88	0.211	-0.74	8.57	0.1	0.213	4.01324	-4.55676	-0.000453143	0.00200535	0.00355756	0.07	1.89402
892.269	7.88	0.211	-0.74	8.575	0.1	0.213	4.01324	-4.56176	-0.000453143	0.00200535	0.00355756	0.07	1.89402
893.259	7.86	0.209	-0.739	8.575	0.1	0.213	4.00306	-4.57194	-0.000472426	0.00201172	0.00355101	0.07	1.89402
894.24	7.84	0.209	-0.739	8.585	0.1	0.213	3.99287	-4.59213	-0.000472426	0.00201172	0.00355101	0.07	1.89402
895.222	7.82	0.209	-0.739	8.585	0.1	0.213	3.98268	-4.60232	-0.000472426	0.00201172	0.00355101	0.07	1.89402
896.208	7.82	0.209	-0.738	8.595	0.1	0.213	3.98268	-4.61232	-0.000472426	0.00201808	0.00356374	0.07	1.89402
897.194	7.82	0.209	-0.738	8.59	0.1	0.213	3.98268	-4.60732	-0.000472426	0.00201808	0.00356374	0.07	1.89402
898.287	7.82	0.209	-0.738	8.595	0.1	0.213	3.98268	-4.61232	-0.000472426	0.00201808	0.00356374	0.07	1.89402
899.269	7.82	0.209	-0.737	8.59	0.1	0.213	3.98268	-4.60732	-0.000472426	0.00202445	0.00357648	0.07	1.89402
900.259	7.82	0.209	-0.737	8.6	0.1	0.213	3.98268	-4.61732	-0.000472426	0.00202445	0.00357648	0.07	1.89402
901.244	7.82	0.207	-0.737	8.595	0.1	0.213	3.98268	-4.61232	-0.000491708	0.00202445	0.00355719	0.07	1.89402
902.223	7.82	0.207	-0.737	8.6	0.1	0.213	3.98268	-4.61732	-0.000491708	0.00202445	0.00355719	0.07	1.89402
903.208	7.82	0.207	-0.736	8.595	0.1	0.213	3.98268	-4.61232	-0.000491708	0.00203082	0.00356993	0.07	1.89402
904.194	7.82	0.209	-0.736	8.6	0.1	0.213	3.98268	-4.61732	-0.000472426	0.00203082	0.00358921	0.07	1.89402
905.291	7.84	0.207	-0.736	8.6	0.1	0.213	3.99287	-4.60713	-0.000491708	0.00203082	0.00356993	0.07	1.89402
906.27	7.84	0.207	-0.736	8.605	0.1	0.213	3.99287	-4.61213	-0.000491708	0.00203082	0.00356993	0.07	1.89402
907.256	7.84	0.207	-0.736	8.595	0.1	0.213	3.99287	-4.60213	-0.000491708	0.00203082	0.00356993	0.07	1.89402
908.24	7.84	0.207	-0.735	8.6	0.1	0.213	3.99287	-4.60713	-0.000491708	0.00203718	0.00358266	0.07	1.89402
909.226	7.84	0.209	-0.735	8.595	0.1	0.213	3.99287	-4.60213	-0.000472426	0.00203718	0.00360194	0.07	1.89402
910.208	7.84	0.207	-0.735	8.6	0.1	0.213	3.99287	-4.60713	-0.000491708	0.00203718	0.00358266	0.07	1.89402
911.193	7.84	0.209	-0.735	8.6	0.1	0.213	3.99287	-4.60713	-0.000472426	0.00203718	0.00360194	0.07	1.89402
912.285	7.84	0.207	-0.735	8.6	0.1	0.213	3.99287	-4.60713	-0.000491708	0.00203718	0.00358266	0.07	1.89402
913.272	7.84	0.207	-0.735	8.595	0.1	0.213	3.99287	-4.60213	-0.000491708	0.00203718	0.00358266	0.07	1.89402
914.258	7.84	0.207	-0.735	8.6	0.1	0.213	3.99287	-4.60713	-0.000491708	0.00203718	0.00358266	0.07	1.89402
915.243	7.84	0.207	-0.734	8.595	0.1	0.213	3.99287	-4.60213	-0.000491708	0.00204355	0.00359539	0.07	1.89402
916.224	7.84	0.207	-0.734	8.605	0.1	0.213	3.99287	-4.61213	-0.000491708	0.00204355	0.00359539	0.07	1.89402
917.21	7.84	0.207	-0.734	8.6	0.1	0.213	3.99287	-4.60713	-0.000491708	0.00204355	0.00359539	0.07	1.89402
918.193	7.84	0.209	-0.734	8.605	0.1	0.213	3.99287	-4.61213	-0.000472426	0.00204355	0.00361467	0.07	1.89402
919.291	7.84	0.207	-0.734	8.595	0.1	0.213	3.99287	-4.60213	-0.000491708	0.00204355	0.00359539	0.07	1.89402
920.27	7.84	0.207	-0.734	8.6	0.1	0.213	3.99287	-4.60713	-0.000491708	0.00204355	0.00359539	0.07	1.89402
921.254	7.84	0.207	-0.734	8.6	0.1	0.213	3.99287	-4.60713	-0.000491708	0.00204355	0.00359539	0.065	1.75874
922.244	7.84	0.207	-0.734	8.6	0.1	0.213	3.99287	-4.60713	-0.000491708	0.00204355	0.00359539	0.065	1.75874
923.222	7.84	0.207	-0.733	8.595	0.1	0.213	3.99287	-4.60213	-0.000491708	0.00204992	0.00360812	0.065	1.75874
924.208	7.84	0.207	-0.733	8.6	0.1	0.213	3.99287	-4.60713	-0.000491708	0.00204992	0.00360812	0.065	1.75874
925.195	7.84	0.207	-0.733	8.595	0.1	0.213	3.99287	-4.60213	-0.000491708	0.00204992	0.00360812	0.065	1.75874
926.285	7.84	0.207	-0.733	8.605	0.1	0.213	3.99287	-4.61213	-0.000491708	0.00204992	0.00360812	0.065	1.75874
927.269	7.84	0.207	-0.733	8.6	0.1	0.213	3.99287	-4.60713	-0.000491708	0.00204992	0.00360812	0.07	1.89402
928.253	7.84	0.207	-0.733	8.605	0.1	0.213	3.99287	-4.61213	-0.000491708	0.00204992	0.00360812	0.065	1.75874
929.24	7.84	0.209	-0.733	8.595	0.1	0.213	3.99287	-4.60213	-0.000472426	0.00204992	0.00362741	0.065	1.75874
930.222	7.84	0.207	-0.733	8.605	0.1	0.213	3.99287	-4.61213	-0.000491708	0.00204992	0.00360812	0.065	1.75874
931.208	7.84	0.207	-0.733	8.6	0.1	0.213	3.99287	-4.60713	-0.000491708	0.00204992	0.00360812	0.065	1.75874
932.195	7.84	0.207	-0.732	8.605	0.1	0.213	3.99287	-4.61213	-0.000491708	0.00205628	0.00362086	0.065	1.75874
933.288	7.84	0.207	-0.732	8.6	0.1	0.213	3.99287	-4.60713	-0.000491708	0.00205628	0.00362086	0.065	1.75874
934.271	7.84	0.207	-0.732	8.6	0.1	0.213	3.99287	-4.60713	-0.000491708	0.00205628	0.00362086	0.065	1.75874
935.253	7.84	0.207	-0.732	8.6	0.1	0.213	3.99287	-4.60713	-0.000491708	0.00205628	0.00362086	0.065	1.75874
936.238	7.86	0.207	-0.732	8.605	0.1	0.213	4.00306	-4.60194	-0.000491708	0.00205628	0.00362086	0.065	1.75874
937.223	7.84	0.207	-0.732	8.595	0.1	0.213	3.99287	-4.60213	-0.000491708	0.00205628	0.00362086	0.065	1.75874
938.208	7.84	0.207	-0.732	8.605	0.1	0.213	3.99287	-4.61213	-0.000491708	0.00205628	0.00362086	0.065	1.75874
939.196	7.84	0.207	-0.732	8.6	0.1	0.213	3.99287	-4.60713	-0.000491708	0.00205628	0.00362086	0.065	1.75874
940.285	7.86	0.207	-0.732	8.6	0.1	0.213	4.00306	-4.59694	-0.000491708	0.00205628	0.00362086	0.065	1.75874
941.269	7.86	0.207	-0.732	8.6	0.1	0.213	4.00306	-4.59694	-0.000491708	0.00205628	0.00362086	0.065	1.75874
942.258	7.86	0.207	-0.732	8.605	0.1	0.213	4.00306	-4.60194	-0.000491708	0.00205628	0.00362086	0.065	1.75874
943.243	7.86	0.207	-0.732	8.595	0.1	0.213	4.00306	-4.59194	-0.000491708	0.00205628	0.00362086	0.065	1.75874
944.222	7.86	0.207	-0.731	8.605	0.1	0.213	4.00306	-4.60194	-0.000491708	0.00206265	0.00363359	0.065	1.75874
945.209	7.84	0.207	-0.731	8.595	0.1	0.213	3.99287	-4.60213	-0.000491708	0.00206265	0.00363359	0.065	1.75874
946.191	7.84	0.207	-0.731	8.605	0.1	0.213	3.99287	-4.61213	-0.000491708	0.00206265	0.00363359	0.065	1.75874
947.285	7.84	0.209	-0.731	8.6	0.1	0.213	3.99287	-4.60713	-0.000472426	0.00206265	0.00365287	0.065	1.75874
948.269	7.86	0.207	-0.731	8.605	0.1	0.213	4.00306	-4.60194	-0.000491708	0.00206265	0.00363359	0.065	1.75874
949.255	7.84	0.207	-0.731	8.595	0.1	0.213	3.99287	-4.60213	-0.000491708	0.00206265	0.00363359	0.065	1.75874
950.24	7.84	0.207	-0.731	8.6	0.1	0.213	3.99287	-4.60713	-0.000491708	0.00206265	0.00363359	0.065	1.75874
951.222	7.84	0.207	-0.731	8.595	0.1	0.213	3.99287	-4.60213	-0.000491708	0.00206265	0.00363359	0.065	1.75874
952.208	7.84	0.207	-0.731	8.6	0.1	0.213	3.99287	-4.60713	-0.000491708	0.00206265	0.00363359	0.065	1.75874
953.194	7.84	0.207	-0.731	8.595	0.1	0.213	3.99287	-4.60213	-0.000491708	0.00206265	0.00363359	0.065	1.75874
954.291	7.84	0.207	-0.731	8.6	0.1	0.213	3.99287	-4.60713	-0.000491708	0.00206265	0.00363359	0.065	1.75874
955.272	7.84	0.207	-0.731	8.6	0.1	0.213	3.99287	-4.60713	-0.000491708	0.00206265	0.00363359	0.065	1.75874
956.259	7.84	0.207	-0.731	8.6	0.1	0.213	3.99287	-4.60713	-0.000491708	0.00206265	0.00363359	0.065	1.75874
957.243	7.84	0.207	-0.731	8.6	0.1	0.213	3.99287	-4.60713	-0.000491708	0.00206265	0.00363359	0.065	1.75874
958.223	7.84	0.207	-0.731	8.6	0.1	0.213	3.99287	-4.60713	-0.000491708	0.00206265	0.00363359	0.065	1.75874
959.208	7.84	0.207	-0.731	8.595	0.1	0.213	3.99287	-4.60213	-0.000491708	0.00206265	0.00363359	0.065	1.75874
960.196	7.84	0.207	-0.731	8.6	0.1	0.213	3.99287	-4.60713	-0.000491708	0.00206265	0.00363359	0.065	1.75874
961.29	7.84	0.207	-0.731	8.6	0.1	0.213	3.99287	-4.60713	-0.000491708	0.00206265	0.00363359	0.065	1.75874
962.27	7.84	0.207	-0.73	8.6	0.1	0.213	3.99287	-4.60713	-0.000491708	0.00206901	0.00364632	0.065	1.75874
963.259	7.84	0.207	-0.73	8.6	0.1	0.213	3.99287	-4.60713	-0.000491708	0.00206901	0.00364632	0.065	1.75874
964.244	7.86	0.207	-0.73	8.6	0.1	0.213	4.00306	-4.59694	-0.000491708	0.00206901	0.00364632	0.065	1.75874
965.223	7.84	0.209	-0.73	8.6	0.1	0.213	3.99287	-4.60713	-0.000472426	0.00206901	0.0036656	0.065	1.75874
966.207	7.84	0.207	-0.73	8.6	0.1	0.213	3.99287	-4.60713	-0.000491708	0.00206901	0.00364632	0.065	1.75874
967.194	7.84	0.207	-0.73	8.6	0.1	0.213	3.99287	-4.60713	-0.000491708	0.00206901	0.00364632	0.065	1.75874
968.285	7.84	0.207	-0.73	8.605	0.1	0.213	3.99287	-4.61213	-0.000491708	0.00206901	0.00364632	0.065	1.75874
969.271	7.84	0.207	-0.73	8.6	0.1	0.213	3.99287	-4.60713	-0.000491708	0.00206901	0.00364632	0.065	1.75874
970.254	7.84	0.207	-0.73	8.6	0.1	0.213	3.99287	-4.60713	-0.000491708	0.00206901	0.00364632	0.065	1.75874
971.243	7.84	0.207	-0.73	8.6	0.1	0.213	3.99287	-4.60713	-0.000491708	0.00206901	0.00364632	0.065	1.75874
972.223	7.84	0.207	-0.73	8.6	0.1	0.213	3.99287	-4.60713	-0.000491708	0.00206901	0.00364632	0.065	1.75874
973.207	7.84	0.207	-0.73	8.6	0.1	0.213	3.99287	-4.60713	-0.000491708	0.00206901	0.00364632	0.065	1.75874
974.196	7.84	0.207	-0.73	8.6	0.1	0.213	3.99287	-4.60713	-0.000491708	0.00206901	0.00364632	0.065	1.75874
975.291	7.84	0.207	-0.73	8.6	0.1	0.213	3.99287	-4.60713	-0.000491708	0.00206901	0.00364632	0.065	1.75874
976.27	7.86	0.207	-0.73	8.605	0.1	0.213	4.00306	-4.60194	-0.000491708	0.00206901	0.00364632	0.065	1.75874
977.258	7.86	0.207	-0.73	8.6	0.1	0.213	4.00306	-4.59694	-0.000491708	0.00206901	0.00364632	0.065	1.75874
978.238	7.84	0.209	-0.73	8.6	0.1	0.213	3.99287	-4.60713	-0.000472426	0.00206901	0.0036656	0.065	1.75874
979.226	7.84	0.207	-0.73	8.6	0.1	0.213	3.99287	-4.60713	-0.000491708	0.00206901	0.00364632	0.065	1.75874
980.208	7.84	0.207	-0.73	8.6	0.1	0.213	3.99287	-4.60713	-0.000491708	0.00206901	0.00364632	0.065	1.75874
981.192	7.84	0.207	-0.73	8.6	0.1	0.213	3.99287	-4.60713	-0.000491708	0.00206901	0.00364632	0.065	1.75874
982.291	7.86	0.207	-0.73	8.605	0.1	0.213	4.00306	-4.60194	-0.000491708	0.00206901	0.00364632	0.065	1.75874
983.269	7.84	0.207	-0.73	8.6	0.1	0.213	3.99287	-4.60713	-0.000491708	0.00206901	0.00364632	0.065	1.75874
984.255	7.86	0.207	-0.73	8.605	0.1	0.213	4.00306	-4.60194	-0.000491708	0.00206901	0.00364632	0.065	1.75874
985.244	7.84	0.207	-0.729	8.6	0.1	0.213	3.99287	-4.60713	-0.000491708	0.00207538	0.00365905	0.065	1.75874
986.224	7.84	0.207	-0.729	8.605	0.1	0.213	3.99287	-4.61213	-0.000491708	0.00207538	0.00365905	0.065	1.75874
987.208	7.84	0.207	-0.729	8.6	0.1	0.213	3.99287	-4.60713	-0.000491708	0.00207538	0.00365905	0.065	1.75874
988.194	7.84	0.207	-0.729	8.605	0.1	0.213	3.99287	-4.61213	-0.000491708	0.00207538	0.00365905	0.065	1.75874
989.291	7.84	0.207	-0.729	8.595	0.1	0.213	3.99287	-4.60213	-0.000491708	0.00207538	0.00365905	0.065	1.75874
990.269	7.84	0.207	-0.729	8.605	0.1	0.213	3.99287	-4.61213	-0.000491708	0.00207538	0.00365905	0.065	1.75874
991.258	7.84	0.207	-0.729	8.6	0.1	0.213	3.99287	-4.60713	-0.000491708	0.00207538	0.00365905	0.065	1.75874
992.243	7.86	0.209	-0.729	8.6	0.1	0.213	4.00306	-4.59694	-0.000472426	0.00207538	0.00367834	0.065	1.75874
993.222	7.86	0.207	-0.729	8.6	0.1	0.213	4.00306	-4.59694	-0.000491708	0.00207538	0.00365905	0.065	1.75874
994.208	7.86	0.207	-0.729	8.6	0.1	0.213	4.00306	-4.59694	-0.000491708	0.00207538	0.00365905	0.065	1.75874
995.196	7.86	0.207	-0.729	8.6	0.1	0.213	4.00306	-4.59694	-0.000491708	0.00207538	0.00365905	0.065	1.75874
996.285	7.86	0.209	-0.729	8.6	0.1	0.213	4.00306	-4.59694	-0.000472426	0.00207538	0.00367834	0.065	1.75874
997.27	7.86	0.209	-0.729	8.6	0.1	0.213	4.00306	-4.59694	-0.000472426	0.00207538	0.00367834	0.065	1.75874
998.257	7.86	0.209	-0.729	8.6	0.1	0.213	4.00306	-4.59694	-0.000472426	0.00207538	0.00367834	0.065	1.75874
999.244	7.86	0.209	-0.729	8.6	0.1	0.213	4.00306	-4.59694	-0.000472426	0.00207538	0.00367834	0.065	1.75874
1000.22	7.86	0.209	-0.729	8.6	0.1	0.213	4.00306	-4.59694	-0.000472426	0.00207538	0.00367834	0.065	1.75874
1001.21	7.86	0.209	-0.729	8.595	0.1	0.213	4.00306	-4.59194	-0.000472426	0.00207538	0.00367834	0.065	1.75874
1002.19	7.86	0.207	-0.729	8.6	0.1	0.213	4.00306	-4.59694	-0.000491708	0.00207538	0.00365905	0.065	1.75874
1003.29	7.86	0.207	-0.729	8.595	0.1	0.213	4.00306	-4.59194	-0.000491708	0.00207538	0.00365905	0.065	1.75874
1004.27	7.86	0.207	-0.729	8.605	0.1	0.213	4.00306	-4.60194	-0.000491708	0.00207538	0.00365905	0.065	1.75874
1005.26	7.86	0.207	-0.729	8.605	0.1	0.213	4.00306	-4.60194	-0.000491708	0.00207538	0.00365905	0.065	1.75874
1006.24	7.86	0.209	-0.729	8.6	0.1	0.213	4.00306	-4.59694	-0.000472426	0.00207538	0.00367834	0.065	1.75874
1007.22	7.86	0.209	-0.729	8.6	0.1	0.213	4.00306	-4.59694	-0.000472426	0.00207538	0.00367834	0.065	1.75874
1008.21	7.86	0.209	-0.729	8.6	0.1	0.213	4.00306	-4.59694	-0.000472426	0.00207538	0.00367834	0.065	1.75874
1009.2	7.86	0.209	-0.729	8.6	0.1	0.213	4.00306	-4.59694	-0.000472426	0.00207538	0.00367834	0.065	1.75874
1010.29	7.86	0.209	-0.729	8.6	0.1	0.213	4.00306	-4.59694	-0.000472426	0.00207538	0.00367834	0.065	1.75874
1011.27	7.86	0.207	-0.729	8.6	0.1	0.213	4.00306	-4.59694	-0.000491708	0.00207538	0.00365905	0.065	1.75874
1012.26	7.86	0.207	-0.728	8.605	0.1	0.213	4.00306	-4.60194	-0.000491708	0.00208175	0.00367178	0.065	1.75874
1013.24	7.84	0.207	-0.728	8.595	0.1	0.213	3.99287	-4.60213	-0.000491708	0.00208175	0.00367178	0.065	1.75874
1014.23	7.84	0.207	-0.728	8.6	0.1	0.213	3.99287	-4.60713	-0.000491708	0.00208175	0.00367178	0.065	1.75874
1015.21	7.84	0.209	-0.728	8.6	0.1	0.213	3.99287	-4.60713	-0.000472426	0.00208175	0.00369107	0.065	1.75874
1016.19	7.84	0.207	-0.728	8.6	0.1	0.213	3.99287	-4.60713	-0.000491708	0.00208175	0.00367178	0.065	1.75874
1017.28	7.84	0.207	-0.728	8.6	0.1	0.213	3.99287	-4.60713	-0.000491708	0.00208175	0.00367178	0.065	1.75874
1018.27	7.84	0.207	-0.728	8.6	0.1	0.213	3.99287	-4.60713	-0.000491708	0.00208175	0.00367178	0.065	1.75874
1019.26	7.84	0.209	-0.728	8.6	0.1	0.213	3.99287	-4.60713	-0.000472426	0.00208175	0.00369107	0.065	1.75874
1020.24	7.84	0.207	-0.728	8.6	0.1	0.213	3.99287	-4.60713	-0.000491708	0.00208175	0.00367178	0.065	1.75874
1021.22	7.84	0.209	-0.728	8.6	0.1	0.213	3.99287	-4.60713	-0.000472426	0.00208175	0.00369107	0.065	1.75874
1022.21	7.86	0.209	-0.728	8.605	0.1	0.213	4.00306	-4.60194	-0.000472426	0.00208175	0.00369107	0.065	1.75874
1023.19	7.84	0.209	-0.728	8.6	0.1	0.213	3.99287	-4.60713	-0.000472426	0.00208175	0.00369107	0.065	1.75874
1024.29	7.84	0.209	-0.728	8.6	0.1	0.213	3.99287	-4.60713	-0.000472426	0.00208175	0.00369107	0.065	1.75874
1025.27	7.84	0.207	-0.728	8.6	0.1	0.213	3.99287	-4.60713	-0.000491708	0.00208175	0.00367178	0.065	1.75874
1026.25	7.84	0.209	-0.728	8.6	0.1	0.213	3.99287	-4.60713	-0.000472426	0.00208175	0.00369107	0.065	1.75874
1027.24	7.84	0.207	-0.728	8.6	0.1	0.213	3.99287	-4.60713	-0.000491708	0.00208175	0.00367178	0.065	1.75874
1028.22	7.84	0.209	-0.728	8.6	0.1	0.213	3.99287	-4.60713	-0.000472426	0.00208175	0.00369107	0.065	1.75874
1029.21	7.84	0.209	-0.728	8.6	0.1	0.213	3.99287	-4.60713	-0.000472426	0.00208175	0.00369107	0.065	1.75874
1030.19	7.84	0.209	-0.728	8.6	0.1	0.213	3.99287	-4.60713	-0.000472426	0.00208175	0.00369107	0.065	1.75874
1031.29	7.84	0.209	-0.728	8.6	0.1	0.213	3.99287	-4.60713	-0.000472426	0.00208175	0.00369107	0.065	1.75874
1032.27	7.84	0.207	-0.728	8.6	0.1	0.213	3.99287	-4.60713	-0.000491708	0.00208175	0.00367178	0.065	1.75874
1033.25	7.84	0.209	-0.728	8.6	0.1	0.213	3.99287	-4.60713	-0.000472426	0.00208175	0.00369107	0.065	1.75874
1034.24	7.84	0.209	-0.728	8.6	0.1	0.213	3.99287	-4.60713	-0.000472426	0.00208175	0.00369107	0.065	1.75874
1035.22	7.84	0.209	-0.728	8.6	0.1	0.213	3.99287	-4.60713	-0.000472426	0.00208175	0.00369107	0.065	1.75874
1036.21	7.84	0.209	-0.728	8.6	0.1	0.213	3.99287	-4.60713	-0.000472426	0.00208175	0.00369107	0.065	1.75874
1037.19	7.84	0.209	-0.728	8.6	0.1	0.213	3.99287	-4.60713	-0.000472426	0.00208175	0.00369107	0.065	1.75874
1038.29	7.84	0.209	-0.728	8.6	0.1	0.213	3.99287	-4.60713	-0.000472426	0.00208175	0.00369107	0.065	1.75874
1039.27	7.84	0.209	-0.728	8.6	0.1	0.213	3.99287	-4.60713	-0.000472426	0.00208175	0.00369107	0.065	1.75874
1040.25	7.84	0.209	-0.728	8.6	0.1	0.213	3.99287	-4.60713	-0.000472426	0.00208175	0.00369107	0.06	1.62345
1041.24	7.84	0.209	-0.728	8.6	0.1	0.213	3.99287	-4.60713	-0.000472426	0.00208175	0.00369107	0.06	1.62345
1042.22	7.84	0.209	-0.728	8.6	0.1	0.213	3.99287	-4.60713	-0.000472426	0.00208175	0.00369107	0.06	1.62345
1043.21	7.84	0.209	-0.728	8.595	0.1	0.213	3.99287	-4.60213	-0.000472426	0.00208175	0.00369107	0.065	1.75874
1044.19	7.84	0.209	-0.727	8.6	0.1	0.213	3.99287	-4.60713	-0.000472426	0.00208811	0.0037038	0.06	1.62345
1045.29	7.86	0.209	-0.727	8.6	0.1	0.213	4.00306	-4.59694	-0.000472426	0.00208811	0.0037038	0.065	1.75874
1046.27	7.84	0.209	-0.727	8.6	0.1	0.213	3.99287	-4.60713	-0.000472426	0.00208811	0.0037038	0.06	1.62345
1047.26	7.84	0.209	-0.727	8.6	0.1	0.213	3.99287	-4.60713	-0.000472426	0.00208811	0.0037038	0.06	1.62345
1048.24	7.84	0.209	-0.727	8.6	0.1	0.213	3.99287	-4.60713	-0.000472426	0.00208811	0.0037038	0.065	1.75874
1049.22	7.84	0.209	-0.727	8.6	0.1	0.213	3.99287	-4.60713	-0.000472426	0.00208811	0.0037038	0.06	1.62345
1050.21	7.84	0.209	-0.727	8.6	0.1	0.213	3.99287	-4.60713	-0.000472426	0.00208811	0.0037038	0.06	1.62345
1051.2	7.84	0.209	-0.727	8.6	0.1	0.213	3.99287	-4.60713	-0.000472426	0.00208811	0.0037038	0.06	1.62345
1052.29	7.84	0.209	-0.727	8.6	0.1	0.213	3.99287	-4.60713	-0.000472426	0.00208811	0.0037038	0.06	1.62345
1053.27	7.84	0.209	-0.727	8.6	0.1	0.213	3.99287	-4.60713	-0.000472426	0.00208811	0.0037038	0.06	1.62345
1054.26	7.84	0.209	-0.727	8.6	0.1	0.213	3.99287	-4.60713	-0.000472426	0.00208811	0.0037038	0.06	1.62345
1055.24	7.84	0.209	-0.727	8.595	0.1	0.213	3.99287	-4.60213	-0.000472426	0.00208811	0.0037038	0.06	1.62345
1056.22	7.84	0.209	-0.727	8.6	0.1	0.213	3.99287	-4.60713	-0.000472426	0.00208811	0.0037038	0.06	1.62345
1057.21	7.84	0.209	-0.727	8.6	0.1	0.213	3.99287	-4.60713	-0.000472426	0.00208811	0.0037038	0.06	1.62345
1058.19	7.84	0.209	-0.727	8.6	0.1	0.213	3.99287	-4.60713	-0.000472426	0.00208811	0.0037038	0.06	1.62345
1059.29	7.84	0.209	-0.727	8.6	0.1	0.213	3.99287	-4.60713	-0.000472426	0.00208811	0.0037038	0.06	1.62345
1060.27	7.84	0.209	-0.727	8.6	0.1	0.213	3.99287	-4.60713	-0.000472426	0.00208811	0.0037038	0.06	1.62345
1061.26	7.84	0.209	-0.727	8.6	0.1	0.213	3.99287	-4.60713	-0.000472426	0.00208811	0.0037038	0.06	1.62345
1062.24	7.84	0.209	-0.727	8.605	0.1	0.213	3.99287	-4.61213	-0.000472426	0.00208811	0.0037038	0.06	1.62345
1063.22	7.84	0.209	-0.727	8.6	0.1	0.213	3.99287	-4.60713	-0.000472426	0.00208811	0.0037038	0.06	1.62345
1064.21	7.84	0.209	-0.727	8.6	0.1	0.213	3.99287	-4.60713	-0.000472426	0.00208811	0.0037038	0.06	1.62345
1065.19	7.84	0.209	-0.727	8.6	0.1	0.213	3.99287	-4.60713	-0.000472426	0.00208811	0.0037038	0.06	1.62345
1066.29	7.84	0.209	-0.727	8.6	0.1	0.213	3.99287	-4.60713	-0.000472426	0.00208811	0.0037038	0.06	1.62345
1067.27	7.84	0.209	-0.727	8.605	0.1	0.213	3.99287	-4.61213	-0.000472426	0.00208811	0.0037038	0.06	1.62345
1068.26	7.84	0.209	-0.727	8.6	0.1	0.213	3.99287	-4.60713	-0.000472426	0.00208811	0.0037038	0.06	1.62345
1069.24	7.84	0.209	-0.727	8.595	0.1	0.213	3.99287	-4.60213	-0.000472426	0.00208811	0.0037038	0.06	1.62345
1070.22	7.84	0.209	-0.727	8.595	0.1	0.213	3.99287	-4.60213	-0.000472426	0.00208811	0.0037038	0.06	1.62345
1071.21	7.84	0.209	-0.727	8.6	0.1	0.213	3.99287	-4.60713	-0.000472426	0.00208811	0.0037038	0.06	1.62345
1072.19	7.84	0.209	-0.727	8.605	0.1	0.213	3.99287	-4.61213	-0.000472426	0.00208811	0.0037038	0.06	1.62345
1073.29	7.86	0.209	-0.727	8.605	0.1	0.213	4.00306	-4.60194	-0.000472426	0.00208811	0.0037038	0.06	1.62345
1074.27	7.86	0.209	-0.727	8.6	0.1	0.213	4.00306	-4.59694	-0.000472426	0.00208811	0.0037038	0.06	1.62345
1075.25	7.86	0.209	-0.727	8.6	0.1	0.213	4.00306	-4.59694	-0.000472426	0.00208811	0.0037038	0.06	1.62345
1076.24	7.86	0.209	-0.727	8.6	0.1	0.213	4.00306	-4.59694	-0.000472426	0.00208811	0.0037038	0.06	1.62345
1077.22	7.86	0.209	-0.727	8.605	0.1	0.213	4.00306	-4.60194	-0.000472426	0.00208811	0.0037038	0.06	1.62345
1078.21	7.84	0.209	-0.727	8.6	0.1	0.213	3.99287	-4.60713	-0.000472426	0.00208811	0.0037038	0.06	1.62345
1079.19	7.84	0.209	-0.726	8.6	0.1	0.213	3.99287	-4.60713	-0.000472426	0.00209448	0.00371653	0.06	1.62345
1080.29	7.84	0.209	-0.726	8.6	0.1	0.213	3.99287	-4.60713	-0.000472426	0.00209448	0.00371653	0.06	1.62345
1081.27	7.84	0.209	-0.726	8.6	0.1	0.213	3.99287	-4.60713	-0.000472426	0.00209448	0.00371653	0.06	1.62345
1082.25	7.84	0.209	-0.726	8.6	0.1	0.213	3.99287	-4.60713	-0.000472426	0.00209448	0.00371653	0.06	1.62345
1083.24	7.84	0.209	-0.726	8.6	0.1	0.213	3.99287	-4.60713	-0.000472426	0.00209448	0.00371653	0.06	1.62345
1084.23	7.84	0.209	-0.726	8.6	0.1	0.213	3.99287	-4.60713	-0.000472426	0.00209448	0.00371653	0.06	1.62345
1085.21	7.84	0.209	-0.726	8.6	0.1	0.213	3.99287	-4.60713	-0.000472426	0.00209448	0.00371653	0.06	1.62345
1086.19	7.84	0.209	-0.726	8.6	0.1	0.213	3.99287	-4.60713	-0.000472426	0.00209448	0.00371653	0.06	1.62345
1087.29	7.84	0.209	-0.726	8.605	0.1	0.213	3.99287	-4.61213	-0.000472426	0.00209448	0.00371653	0.06	1.62345
1088.27	7.84	0.209	-0.726	8.6	0.1	0.213	3.99287	-4.60713	-0.000472426	0.00209448	0.00371653	0.06	1.62345
1089.25	7.84	0.209	-0.726	8.595	0.1	0.213	3.99287	-4.60213	-0.000472426	0.00209448	0.00371653	0.06	1.62345
1090.24	7.84	0.209	-0.726	8.595	0.1	0.213	3.99287	-4.60213	-0.000472426	0.00209448	0.00371653	0.06	1.62345
1091.22	7.84	0.209	-0.726	8.6	0.1	0.213	3.99287	-4.60713	-0.000472426	0.00209448	0.00371653	0.06	1.62345
1092.21	7.84	0.209	-0.726	8.6	0.1	0.213	3.99287	-4.60713	-0.000472426	0.00209448	0.00371653	0.06	1.62345
1093.2	7.84	0.209	-0.726	8.6	0.1	0.213	3.99287	-4.60713	-0.000472426	0.00209448	0.00371653	0.06	1.62345
1094.29	7.84	0.209	-0.726	8.595	0.1	0.213	3.99287	-4.60213	-0.000472426	0.00209448	0.00371653	0.06	1.62345
1095.27	7.84	0.209	-0.726	8.6	0.1	0.213	3.99287	-4.60713	-0.000472426	0.00209448	0.00371653	0.06	1.62345
1096.26	7.84	0.209	-0.726	8.605	0.1	0.213	3.99287	-4.61213	-0.000472426	0.00209448	0.00371653	0.06	1.62345
1097.24	7.84	0.209	-0.726	8.6	0.1	0.213	3.99287	-4.60713	-0.000472426	0.00209448	0.00371653	0.06	1.62345
1098.22	7.84	0.209	-0.726	8.58	0.1	0.213	3.99287	-4.58713	-0.000472426	0.00209448	0.00371653	0.06	1.62345
1099.21	7.84	0.209	-0.726	8.55	0.1	0.213	3.99287	-4.55713	-0.000472426	0.00209448	0.00371653	0.06	1.62345
1100.2	7.84	0.209	-0.726	8.495	0.1	0.213	3.99287	-4.50213	-0.000472426	0.00209448	0.00371653	0.06	1.62345
1101.29	7.84	0.209	-0.726	8.43	0.1	0.213	3.99287	-4.43713	-0.000472426	0.00209448	0.00371653	0.06	1.62345
1102.27	7.84	0.209	-0.727	8.385	0.1	0.213	3.99287	-4.39213	-0.000472426	0.00208811	0.0037038	0.06	1.62345
1103.26	7.82	0.209	-0.727	8.335	0.1	0.213	3.98268	-4.35232	-0.000472426	0.00208811	0.0037038	0.06	1.62345
1104.24	7.82	0.209	-0.727	8.28	0.1	0.213	3.98268	-4.29732	-0.000472426	0.00208811	0.0037038	0.06	1.62345
1105.22	7.8	0.209	-0.727	8.235	0.1	0.213	3.9725	-4.2625	-0.000472426	0.00208811	0.0037038	0.06	1.62345
1106.21	7.8	0.209	-0.728	8.18	0.1	0.213	3.9725	-4.2075	-0.000472426	0.00208175	0.00369107	0.06	1.62345
1107.19	7.8	0.211	-0.728	8.135	0.1	0.213	3.9725	-4.1625	-0.000453143	0.00208175	0.00371035	0.06	1.62345
1108.29	7.8	0.211	-0.728	8.07	0.1	0.213	3.9725	-4.0975	-0.000453143	0.00208175	0.00371035	0.06	1.62345
1109.27	7.8	0.211	-0.728	8.025	0.1	0.213	3.9725	-4.0525	-0.000453143	0.00208175	0.00371035	0.06	1.62345
1110.25	7.8	0.211	-0.728	7.97	0.1	0.213	3.9725	-3.9975	-0.000453143	0.00208175	0.00371035	0.065	1.75874
1111.24	7.84	0.212	-0.729	7.93	0.1	0.213	3.99287	-3.93713	-0.000443502	0.00207538	0.00370726	0.065	1.75874
1112.22	7.86	0.214	-0.729	7.88	0.1	0.213	4.00306	-3.87694	-0.000424219	0.00207538	0.00372654	0.065	1.75874
1113.21	7.86	0.216	-0.729	7.835	0.1	0.213	4.00306	-3.83194	-0.000404936	0.00207538	0.00374582	0.065	1.75874
1114.19	7.86	0.216	-0.729	7.78	0.1	0.213	4.00306	-3.77694	-0.000404936	0.00207538	0.00374582	0.065	1.75874
1115.29	7.86	0.217	-0.73	7.73	0.1	0.213	4.00306	-3.72694	-0.000395295	0.00206901	0.00374273	0.065	1.75874
1116.27	7.84	0.219	-0.73	7.675	0.1	0.213	3.99287	-3.68213	-0.000376012	0.00206901	0.00376202	0.065	1.75874
1117.26	7.86	0.219	-0.73	7.625	0.1	0.213	4.00306	-3.62194	-0.000376012	0.00206901	0.00376202	0.065	1.75874
1118.24	7.84	0.219	-0.73	7.58	0.1	0.213	3.99287	-3.58713	-0.000376012	0.00206901	0.00376202	0.065	1.75874
1119.23	7.86	0.222	-0.731	7.535	0.1	0.213	4.00306	-3.53194	-0.000347088	0.00206265	0.00377821	0.065	1.75874
1120.21	7.86	0.222	-0.731	7.485	0.1	0.213	4.00306	-3.48194	-0.000347088	0.00206265	0.00377821	0.065	1.75874
1121.19	7.84	0.224	-0.731	7.43	0.1	0.213	3.99287	-3.43713	-0.000327806	0.00206265	0.00379749	0.065	1.75874
1122.29	7.84	0.226	-0.731	7.38	0.1	0.213	3.99287	-3.38713	-0.000308523	0.00206265	0.00381677	0.065	1.75874
1123.27	7.84	0.229	-0.732	7.33	0.1	0.213	3.99287	-3.33713	-0.000279599	0.00205628	0.00383296	0.065	1.75874
1124.26	7.82	0.233	-0.732	7.275	0.1	0.213	3.98268	-3.29232	-0.000241034	0.00205628	0.00387153	0.065	1.75874
1125.24	7.8	0.238	-0.732	7.23	0.1	0.213	3.9725	-3.2575	-0.000192827	0.00205628	0.00391974	0.065	1.75874
1126.22	7.8	0.241	-0.732	7.175	0.1	0.213	3.9725	-3.2025	-0.000163903	0.00205628	0.00394866	0.065	1.75874
1127.21	7.8	0.248	-0.733	7.135	0.1	0.213	3.9725	-3.1625	-9.64134e-05	0.00204992	0.00400342	0.065	1.75874
1128.19	7.78	0.253	-0.733	7.075	0.1	0.213	3.96231	-3.11269	-4.82067e-05	0.00204992	0.00405162	0.065	1.75874
1129.29	7.8	0.263	-0.733	7.03	0.1	0.213	3.9725	-3.0575	4.82067e-05	0.00204992	0.00414804	0.065	1.75874
1130.27	7.78	0.269	-0.733	6.98	0.1	0.213	3.96231	-3.01769	0.000106055	0.00204992	0.00420589	0.065	1.75874
1131.25	7.8	0.279	-0.734	6.925	0.1	0.213	3.9725	-2.9525	0.000202468	0.00204355	0.00428957	0.065	1.75874
1132.24	7.8	0.289	-0.734	6.88	0.1	0.213	3.9725	-2.9075	0.000298882	0.00204355	0.00438598	0.065	1.75874
1133.22	7.8	0.299	-0.734	6.825	0.1	0.213	3.9725	-2.8525	0.000395295	0.00204355	0.00448239	0.065	1.75874
1134.21	7.82	0.309	-0.735	6.78	0.1	0.213	3.98268	-2.79732	0.000491708	0.00203718	0.00456607	0.065	1.75874
1135.19	7.9	0.316	-0.735	6.73	0.1	0.213	4.02343	-2.70657	0.000559198	0.00203718	0.00463356	0.065	1.75874
1136.29	7.94	0.318	-0.735	6.67	0.1	0.213	4.0438	-2.6262	0.000578481	0.00203718	0.00465285	0.065	1.75874
1137.27	7.96	0.32	-0.736	6.63	0.1	0.213	4.05399	-2.57601	0.000597763	0.00203082	0.0046594	0.065	1.75874
1138.26	7.96	0.32	-0.736	6.575	0.1	0.213	4.05399	-2.52101	0.000597763	0.00203082	0.0046594	0.065	1.75874
1139.24	7.94	0.32	-0.736	6.53	0.1	0.213	4.0438	-2.4862	0.000597763	0.00203082	0.0046594	0.065	1.75874
1140.22	7.92	0.32	-0.737	6.47	0.1	0.213	4.03361	-2.43639	0.000597763	0.00202445	0.00464666	0.065	1.75874
1141.21	7.9	0.32	-0.737	6.425	0.1	0.213	4.02343	-2.40157	0.000597763	0.00202445	0.00464666	0.065	1.75874
1142.19	7.9	0.32	-0.737	6.38	0.1	0.213	4.02343	-2.35657	0.000597763	0.00202445	0.00464666	0.07	1.89402
1143.29	7.88	0.32	-0.738	6.325	0.1	0.213	4.01324	-2.31176	0.000597763	0.00201808	0.00463393	0.07	1.89402
1144.27	7.86	0.32	-0.738	6.28	0.1	0.213	4.00306	-2.27694	0.000597763	0.00201808	0.00463393	0.07	1.89402
1145.26	7.88	0.32	-0.738	6.23	0.1	0.213	4.01324	-2.21676	0.000597763	0.00201808	0.00463393	0.07	1.89402
1146.24	7.88	0.321	-0.739	6.185	0.1	0.213	4.01324	-2.17176	0.000607405	0.00201172	0.00463084	0.07	1.89402
1147.22	7.86	0.321	-0.739	6.13	0.1	0.213	4.00306	-2.12694	0.000607405	0.00201172	0.00463084	0.07	1.89402
1148.21	7.86	0.321	-0.739	6.08	0.1	0.213	4.00306	-2.07694	0.000607405	0.00201172	0.00463084	0.07	1.89402
1149.19	7.86	0.321	-0.74	6.03	0.1	0.213	4.00306	-2.02694	0.000607405	0.00200535	0.00461811	0.07	1.89402
1150.29	7.86	0.321	-0.74	5.97	0.1	0.213	4.00306	-1.96694	0.000607405	0.00200535	0.00461811	0.07	1.89402
1151.27	7.84	0.321	-0.741	5.93	0.1	0.213	3.99287	-1.93713	0.000607405	0.00199899	0.00460538	0.07	1.89402
1152.26	7.86	0.321	-0.741	5.875	0.1	0.213	4.00306	-1.87194	0.000607405	0.00199899	0.00460538	0.07	1.89402
1153.24	7.84	0.321	-0.742	5.825	0.1	0.213	3.99287	-1.83213	0.000607405	0.00199262	0.00459264	0.07	1.89402
1154.22	7.84	0.321	-0.742	5.775	0.1	0.213	3.99287	-1.78213	0.000607405	0.00199262	0.00459264	0.07	1.89402
1155.21	7.86	0.321	-0.742	5.735	0.1	0.213	4.00306	-1.73194	0.000607405	0.00199262	0.00459264	0.07	1.89402
1156.19	7.86	0.321	-0.743	5.68	0.1	0.213	4.00306	-1.67694	0.000607405	0.00198625	0.00457991	0.07	1.89402
1157.29	7.84	0.321	-0.743	5.635	0.1	0.213	3.99287	-1.64213	0.000607405	0.00198625	0.00457991	0.07	1.89402
1158.27	7.86	0.321	-0.744	5.58	0.1	0.213	4.00306	-1.57694	0.000607405	0.00197989	0.00456718	0.07	1.89402
1159.26	7.84	0.323	-0.744	5.525	0.1	0.213	3.99287	-1.53213	0.000626687	0.00197989	0.00458646	0.07	1.89402
1160.24	7.84	0.323	-0.745	5.48	0.1	0.213	3.99287	-1.48713	0.000626687	0.00197352	0.00457373	0.07	1.89402
1161.22	7.86	0.323	-0.745	5.43	0.1	0.213	4.00306	-1.42694	0.000626687	0.00197352	0.00457373	0.07	1.89402
1162.21	7.86	0.323	-0.746	5.38	0.1	0.213	4.00306	-1.37694	0.000626687	0.00196716	0.004561	0.075	2.02931
1163.19	7.84	0.323	-0.746	5.325	0.1	0.213	3.99287	-1.33213	0.000626687	0.00196716	0.004561	0.075	2.02931
1164.29	7.84	0.323	-0.747	5.27	0.1	0.213	3.99287	-1.27713	0.000626687	0.00196079	0.00454827	0.075	2.02931
1165.27	7.86	0.323	-0.747	5.225	0.1	0.213	4.00306	-1.22194	0.000626687	0.00196079	0.00454827	0.075	2.02931
1166.26	7.84	0.323	-0.748	5.17	0.1	0.213	3.99287	-1.17713	0.000626687	0.00195442	0.00453553	0.075	2.02931
1167.24	7.84	0.323	-0.748	5.13	0.1	0.213	3.99287	-1.13713	0.000626687	0.00195442	0.00453553	0.075	2.02931
1168.22	7.86	0.323	-0.749	5.075	0.1	0.213	4.00306	-1.07194	0.000626687	0.00194806	0.0045228	0.075	2.02931
1169.21	7.84	0.323	-0.749	5.035	0.1	0.213	3.99287	-1.04213	0.000626687	0.00194806	0.0045228	0.075	2.02931
1170.2	7.84	0.325	-0.75	4.98	0.1	0.213	3.99287	-0.98713	0.00064597	0.00194169	0.00452935	0.075	2.02931
1171.29	7.86	0.325	-0.75	4.925	0.1	0.213	4.00306	-0.921944	0.00064597	0.00194169	0.00452935	0.075	2.02931
1172.27	7.84	0.325	-0.751	4.875	0.1	0.213	3.99287	-0.88213	0.00064597	0.00193532	0.00451662	0.075	2.02931
1173.25	7.84	0.325	-0.751	4.83	0.1	0.213	3.99287	-0.83713	0.00064597	0.00193532	0.00451662	0.075	2.02931
1174.24	7.84	0.325	-0.752	4.78	0.1	0.213	3.99287	-0.78713	0.00064597	0.00192896	0.00450389	0.075	2.02931
1175.22	7.86	0.325	-0.753	4.725	0.1	0.213	4.00306	-0.721944	0.00064597	0.00192259	0.00449115	0.08	2.1646
1176.21	7.84	0.325	-0.753	4.68	0.1	0.213	3.99287	-0.68713	0.00064597	0.00192259	0.00449115	0.08	2.1646
1177.19	7.86	0.326	-0.754	4.635	0.1	0.213	4.00306	-0.631944	0.000655611	0.00191623	0.00448806	0.08	2.1646
1178.29	7.86	0.325	-0.754	4.575	0.1	0.213	4.00306	-0.571944	0.00064597	0.00191623	0.00447842	0.08	2.1646
1179.27	7.84	0.326	-0.755	4.53	0.1	0.213	3.99287	-0.53713	0.000655611	0.00190986	0.00447533	0.08	2.1646
1180.26	7.84	0.325	-0.755	4.475	0.1	0.213	3.99287	-0.48213	0.00064597	0.00190986	0.00446569	0.08	2.1646
1181.24	7.86	0.326	-0.756	4.43	0.1	0.213	4.00306	-0.426944	0.000655611	0.00190349	0.0044626	0.08	2.1646
1182.22	7.84	0.326	-0.757	4.375	0.1	0.213	3.99287	-0.38213	0.000655611	0.00189713	0.00444987	0.08	2.1646
1183.21	7.86	0.326	-0.757	4.335	0.1	0.213	4.00306	-0.331944	0.000655611	0.00189713	0.00444987	0.08	2.1646
1184.19	7.84	0.326	-0.758	4.28	0.1	0.213	3.99287	-0.28713	0.000655611	0.00189076	0.00443713	0.08	2.1646
1185.29	7.86	0.326	-0.759	4.225	0.1	0.213	4.00306	-0.221944	0.000655611	0.00188439	0.0044244	0.085	2.29988
1186.27	7.84	0.328	-0.759	4.18	0.1	0.213	3.99287	-0.18713	0.000674894	0.00188439	0.00444368	0.085	2.29988
1187.26	7.84	0.326	-0.76	4.125	0.1	0.213	3.99287	-0.13213	0.000655611	0.00187803	0.00441167	0.085	2.29988
1188.24	7.84	0.326	-0.761	4.08	0.1	0.213	3.99287	-0.0871301	0.000655611	0.00187166	0.00439894	0.085	2.29988
1189.22	7.84	0.328	-0.761	4.03	0.1	0.213	3.99287	-0.0371301	0.000674894	0.00187166	0.00441822	0.085	2.29988
1190.21	7.84	0.328	-0.762	3.98	0.1	0.213	3.99287	0.0128699	0.000674894	0.0018653	0.00440549	0.085	2.29988
1191.2	7.84	0.328	-0.763	3.935	0.1	0.213	3.99287	0.0578699	0.000674894	0.00185893	0.00439275	0.085	2.29988
1192.29	7.84	0.328	-0.764	3.875	0.1	0.213	3.99287	0.11787	0.000674894	0.00185256	0.00438002	0.09	2.43517
1193.27	7.86	0.328	-0.764	3.83	0.1	0.213	4.00306	0.173056	0.000674894	0.00185256	0.00438002	0.09	2.43517
1194.25	7.84	0.328	-0.765	3.775	0.1	0.213	3.99287	0.21787	0.000674894	0.0018462	0.00436729	0.09	2.43517
1195.24	7.84	0.328	-0.766	3.735	0.1	0.213	3.99287	0.25787	0.000674894	0.00183983	0.00435456	0.09	2.43517
1196.22	7.84	0.33	-0.767	3.675	0.1	0.213	3.99287	0.31787	0.000694177	0.00183346	0.00436111	0.09	2.43517
1197.21	7.84	0.33	-0.767	3.635	0.1	0.213	3.99287	0.35787	0.000694177	0.00183346	0.00436111	0.095	2.57046
1198.19	7.84	0.33	-0.768	3.58	0.1	0.213	3.99287	0.41287	0.000694177	0.0018271	0.00434837	0.095	2.57046
1199.29	7.84	0.33	-0.769	3.53	0.1	0.213	3.99287	0.46287	0.000694177	0.00182073	0.00433564	0.095	2.57046
1200.27	7.84	0.33	-0.77	3.47	0.1	0.213	3.99287	0.52287	0.000694177	0.00181437	0.00432291	0.095	2.57046
1201.25	7.86	0.33	-0.771	3.43	0.1	0.213	4.00306	0.573056	0.000694177	0.001808	0.00431018	0.095	2.57046
1202.24	7.84	0.33	-0.772	3.38	0.1	0.213	3.99287	0.61287	0.000694177	0.00180163	0.00429744	0.1	2.70575
1203.22	7.84	0.33	-0.773	3.335	0.1	0.213	3.99287	0.65787	0.000694177	0.00179527	0.00428471	0.1	2.70575
1204.21	7.84	0.331	-0.774	3.285	0.1	0.213	3.99287	0.70787	0.000703818	0.0017889	0.00428162	0.1	2.70575
1205.2	7.84	0.331	-0.775	3.23	0.1	0.213	3.99287	0.76287	0.000703818	0.00178254	0.00426889	0.1	2.70575
1206.29	7.84	0.331	-0.776	3.17	0.1	0.213	3.99287	0.82287	0.000703818	0.00177617	0.00425616	0.1	2.70575
1207.27	7.86	0.331	-0.777	3.13	0.1	0.213	4.00306	0.873056	0.000703818	0.0017698	0.00424342	0.105	2.84103
1208.26	7.84	0.331	-0.778	3.075	0.1	0.213	3.99287	0.91787	0.000703818	0.00176344	0.00423069	0.105	2.84103
1209.24	7.86	0.331	-0.778	3.04	0.1	0.213	4.00306	0.963056	0.000703818	0.00176344	0.00423069	0.105	2.84103
1210.22	7.86	0.333	-0.78	2.98	0.1	0.213	4.00306	1.02306	0.000723101	0.0017507	0.00422451	0.11	2.97632
1211.21	7.86	0.333	-0.78	2.935	0.1	0.213	4.00306	1.06806	0.000723101	0.0017507	0.00422451	0.11	2.97632
1212.19	7.86	0.333	-0.781	2.875	0.1	0.213	4.00306	1.12806	0.000723101	0.00174434	0.00421178	0.11	2.97632
1213.29	7.86	0.333	-0.782	2.83	0.1	0.213	4.00306	1.17306	0.000723101	0.00173797	0.00419904	0.115	3.11161
1214.27	7.84	0.333	-0.783	2.775	0.1	0.213	3.99287	1.21787	0.000723101	0.00173161	0.00418631	0.115	3.11161
1215.25	7.86	0.333	-0.785	2.725	0.1	0.213	4.00306	1.27806	0.000723101	0.00171887	0.00416085	0.115	3.11161
1216.24	7.84	0.333	-0.785	2.68	0.1	0.213	3.99287	1.31287	0.000723101	0.00171887	0.00416085	0.12	3.2469
1217.22	7.86	0.335	-0.786	2.63	0.1	0.213	4.00306	1.37306	0.000742383	0.00171251	0.0041674	0.12	3.2469
1218.21	7.84	0.333	-0.787	2.58	0.1	0.213	3.99287	1.41287	0.000723101	0.00170614	0.00413538	0.125	3.38218
1219.19	7.86	0.335	-0.788	2.535	0.1	0.213	4.00306	1.46806	0.000742383	0.00169977	0.00414193	0.125	3.38218
1220.29	7.84	0.335	-0.79	2.48	0.1	0.213	3.99287	1.51287	0.000742383	0.00168704	0.00411647	0.125	3.38218
1221.27	7.86	0.335	-0.791	2.445	0.1	0.213	4.00306	1.55806	0.000742383	0.00168068	0.00410374	0.13	3.51747
1222.26	7.84	0.335	-0.792	2.385	0.1	0.213	3.99287	1.60787	0.000742383	0.00167431	0.004091	0.13	3.51747
1223.24	7.86	0.336	-0.793	2.345	0.1	0.213	4.00306	1.65806	0.000752025	0.00166794	0.00408791	0.135	3.65276
1224.22	7.84	0.336	-0.796	2.28	0.1	0.213	3.99287	1.71287	0.000752025	0.00164885	0.00404972	0.135	3.65276
1225.21	7.86	0.336	-0.798	2.235	0.1	0.213	4.00306	1.76806	0.000752025	0.00163611	0.00402425	0.14	3.78805
1226.2	7.84	0.336	-0.8	2.18	0.1	0.213	3.99287	1.81287	0.000752025	0.00162338	0.00399879	0.145	3.92333
1227.29	7.86	0.336	-0.802	2.17	0.1	0.213	4.00306	1.83306	0.000752025	0.00161065	0.00397332	0.15	4.05862
1228.27	7.86	0.336	-0.803	2.205	0.1	0.213	4.00306	1.79806	0.000752025	0.00160428	0.00396059	0.15	4.05862
1229.26	7.88	0.338	-0.802	2.2	0.1	0.213	4.01324	1.81324	0.000771307	0.00161065	0.0039926	0.155	4.19391
1230.24	7.86	0.338	-0.802	2.245	0.1	0.213	4.00306	1.75806	0.000771307	0.00161065	0.0039926	0.155	4.19391
1231.22	7.86	0.338	-0.802	2.255	0.1	0.213	4.00306	1.74806	0.000771307	0.00161065	0.0039926	0.155	4.19391
1232.21	7.86	0.336	-0.802	2.23	0.1	0.213	4.00306	1.77306	0.000752025	0.00161065	0.00397332	0.155	4.19391
1233.19	7.86	0.336	-0.802	2.2	0.1	0.213	4.00306	1.80306	0.000752025	0.00161065	0.00397332	0.155	4.19391
1234.29	7.86	0.338	-0.803	2.16	0.1	0.213	4.00306	1.84306	0.000771307	0.00160428	0.00397987	0.16	4.32919
1235.27	7.86	0.338	-0.803	2.14	0.1	0.213	4.00306	1.86306	0.000771307	0.00160428	0.00397987	0.16	4.32919
1236.26	7.86	0.338	-0.804	2.12	0.1	0.213	4.00306	1.88306	0.000771307	0.00159792	0.00396714	0.16	4.32919
1237.24	7.86	0.338	-0.804	2.115	0.1	0.213	4.00306	1.88806	0.000771307	0.00159792	0.00396714	0.165	4.46448
1238.22	7.86	0.338	-0.805	2.105	0.1	0.213	4.00306	1.89806	0.000771307	0.00159155	0.00395441	0.165	4.46448
1239.21	7.86	0.338	-0.805	2.095	0.1	0.213	4.00306	1.90806	0.000771307	0.00159155	0.00395441	0.165	4.46448
1240.2	7.86	0.338	-0.806	2.08	0.1	0.213	4.00306	1.92306	0.000771307	0.00158518	0.00394167	0.165	4.46448
1241.29	7.86	0.338	-0.806	2.075	0.1	0.213	4.00306	1.92806	0.000771307	0.00158518	0.00394167	0.17	4.59977
1242.27	7.84	0.338	-0.806	2.07	0.1	0.213	3.99287	1.92287	0.000771307	0.00158518	0.00394167	0.17	4.59977
1243.26	7.86	0.338	-0.807	2.065	0.1	0.213	4.00306	1.93806	0.000771307	0.00157882	0.00392894	0.17	4.59977
1244.24	7.86	0.338	-0.807	2.055	0.1	0.213	4.00306	1.94806	0.000771307	0.00157882	0.00392894	0.17	4.59977
1245.22	7.84	0.338	-0.807	2.05	0.1	0.213	3.99287	1.94287	0.000771307	0.00157882	0.00392894	0.17	4.59977
1246.21	7.84	0.338	-0.808	2.045	0.1	0.213	3.99287	1.94787	0.000771307	0.00157245	0.00391621	0.175	4.73506
1247.19	7.84	0.338	-0.808	2.04	0.1	0.213	3.99287	1.95287	0.000771307	0.00157245	0.00391621	0.175	4.73506
1248.29	7.84	0.338	-0.808	2.03	0.1	0.213	3.99287	1.96287	0.000771307	0.00157245	0.00391621	0.175	4.73506
1249.27	7.84	0.338	-0.808	2.025	0.1	0.213	3.99287	1.96787	0.000771307	0.00157245	0.00391621	0.175	4.73506
1250.25	7.84	0.338	-0.809	2.02	0.1	0.213	3.99287	1.97287	0.000771307	0.00156608	0.00390348	0.18	4.87034
1251.24	7.84	0.338	-0.809	2.015	0.1	0.213	3.99287	1.97787	0.000771307	0.00156608	0.00390348	0.18	4.87034
1252.22	7.84	0.338	-0.809	2.015	0.1	0.213	3.99287	1.97787	0.000771307	0.00156608	0.00390348	0.18	4.87034
1253.21	7.84	0.338	-0.809	2.015	0.1	0.213	3.99287	1.97787	0.000771307	0.00156608	0.00390348	0.18	4.87034
1254.19	7.82	0.338	-0.809	2.01	0.1	0.213	3.98268	1.97268	0.000771307	0.00156608	0.00390348	0.18	4.87034
1255.29	7.84	0.338	-0.81	2.005	0.1	0.213	3.99287	1.98787	0.000771307	0.00155972	0.00389074	0.18	4.87034
1256.27	7.84	0.338	-0.81	2.005	0.1	0.213	3.99287	1.98787	0.000771307	0.00155972	0.00389074	0.18	4.87034
1257.26	7.84	0.338	-0.81	2.005	0.1	0.213	3.99287	1.98787	0.000771307	0.00155972	0.00389074	0.18	4.87034
1258.24	7.84	0.34	-0.81	2	0.1	0.213	3.99287	1.99287	0.00079059	0.00155972	0.00391003	0.18	4.87034
1259.22	7.84	0.34	-0.81	2	0.1	0.213	3.99287	1.99287	0.00079059	0.00155972	0.00391003	0.18	4.87034
1260.21	7.84	0.338	-0.81	1.995	0.1	0.213	3.99287	1.99787	0.000771307	0.00155972	0.00389074	0.18	4.87034
1261.19	7.84	0.34	-0.81	1.995	0.1	0.213	3.99287	1.99787	0.00079059	0.00155972	0.00391003	0.18	4.87034
1262.29	7.84	0.338	-0.81	1.995	0.1	0.213	3.99287	1.99787	0.000771307	0.00155972	0.00389074	0.18	4.87034
1263.27	7.84	0.338	-0.81	2	0.1	0.213	3.99287	1.99287	0.000771307	0.00155972	0.00389074	0.18	4.87034
1264.25	7.84	0.338	-0.81	1.995	0.1	0.213	3.99287	1.99787	0.000771307	0.00155972	0.00389074	0.18	4.87034
1265.24	7.84	0.34	-0.81	2	0.1	0.213	3.99287	1.99287	0.00079059	0.00155972	0.00391003	0.18	4.87034
1266.22	7.84	0.338	-0.81	2	0.1	0.213	3.99287	1.99287	0.000771307	0.00155972	0.00389074	0.18	4.87034
1267.21	7.84	0.34	-0.81	2	0.1	0.213	3.99287	1.99287	0.00079059	0.00155972	0.00391003	0.18	4.87034
1268.19	7.84	0.34	-0.81	2	0.1	0.213	3.99287	1.99287	0.00079059	0.00155972	0.00391003	0.185	5.00563
1269.29	7.86	0.34	-0.81	2	0.1	0.213	4.00306	2.00306	0.00079059	0.00155972	0.00391003	0.185	5.00563
1270.27	7.84	0.34	-0.81	2	0.1	0.213	3.99287	1.99287	0.00079059	0.00155972	0.00391003	0.185	5.00563
1271.26	7.86	0.34	-0.811	2	0.1	0.213	4.00306	2.00306	0.00079059	0.00155335	0.00389729	0.185	5.00563
1272.24	7.86	0.338	-0.811	2	0.1	0.213	4.00306	2.00306	0.000771307	0.00155335	0.00387801	0.185	5.00563
1273.22	7.86	0.34	-0.811	2	0.1	0.213	4.00306	2.00306	0.00079059	0.00155335	0.00389729	0.185	5.00563
1274.21	7.86	0.338	-0.811	2	0.1	0.213	4.00306	2.00306	0.000771307	0.00155335	0.00387801	0.185	5.00563
1275.19	7.86	0.34	-0.811	2	0.1	0.213	4.00306	2.00306	0.00079059	0.00155335	0.00389729	0.185	5.00563
1276.29	7.86	0.34	-0.811	2	0.1	0.213	4.00306	2.00306	0.00079059	0.00155335	0.00389729	0.19	5.14092
1277.27	7.86	0.34	-0.811	2	0.1	0.213	4.00306	2.00306	0.00079059	0.00155335	0.00389729	0.185	5.00563
1278.26	7.86	0.34	-0.811	2	0.1	0.213	4.00306	2.00306	0.00079059	0.00155335	0.00389729	0.185	5.00563
1279.24	7.86	0.34	-0.811	2.005	0.1	0.213	4.00306	1.99806	0.00079059	0.00155335	0.00389729	0.185	5.00563
1280.22	7.86	0.34	-0.811	2	0.1	0.213	4.00306	2.00306	0.00079059	0.00155335	0.00389729	0.185	5.00563
1281.21	7.86	0.34	-0.811	2.005	0.1	0.213	4.00306	1.99806	0.00079059	0.00155335	0.00389729	0.185	5.00563
1282.19	7.86	0.34	-0.811	2	0.1	0.213	4.00306	2.00306	0.00079059	0.00155335	0.00389729	0.185	5.00563
1283.29	7.86	0.34	-0.811	2	0.1	0.213	4.00306	2.00306	0.00079059	0.00155335	0.00389729	0.185	5.00563
1284.27	7.86	0.34	-0.811	2	0.1	0.213	4.00306	2.00306	0.00079059	0.00155335	0.00389729	0.185	5.00563
1285.25	7.86	0.34	-0.811	2	0.1	0.213	4.00306	2.00306	0.00079059	0.00155335	0.00389729	0.185	5.00563
1286.24	7.86	0.34	-0.811	2	0.1	0.213	4.00306	2.00306	0.00079059	0.00155335	0.00389729	0.185	5.00563
1287.22	7.86	0.34	-0.811	2	0.1	0.213	4.00306	2.00306	0.00079059	0.00155335	0.00389729	0.185	5.00563
1288.21	7.86	0.34	-0.811	2	0.1	0.213	4.00306	2.00306	0.00079059	0.00155335	0.00389729	0.185	5.00563
1289.19	7.86	0.34	-0.811	2	0.1	0.213	4.00306	2.00306	0.00079059	0.00155335	0.00389729	0.185	5.00563
1290.29	7.84	0.34	-0.811	2	0.1	0.213	3.99287	1.99287	0.00079059	0.00155335	0.00389729	0.185	5.00563
1291.27	7.84	0.34	-0.811	2	0.1	0.213	3.99287	1.99287	0.00079059	0.00155335	0.00389729	0.185	5.00563
1292.25	7.84	0.34	-0.811	2	0.1	0.213	3.99287	1.99287	0.00079059	0.00155335	0.00389729	0.185	5.00563
1293.24	7.86	0.34	-0.811	2	0.1	0.213	4.00306	2.00306	0.00079059	0.00155335	0.00389729	0.185	5.00563
1294.23	7.84	0.34	-0.811	2	0.1	0.213	3.99287	1.99287	0.00079059	0.00155335	0.00389729	0.185	5.00563
1295.21	7.84	0.34	-0.811	2	0.1	0.213	3.99287	1.99287	0.00079059	0.00155335	0.00389729	0.185	5.00563
1296.2	7.84	0.34	-0.811	2	0.1	0.213	3.99287	1.99287	0.00079059	0.00155335	0.00389729	0.185	5.00563
1297.29	7.84	0.34	-0.811	2	0.1	0.213	3.99287	1.99287	0.00079059	0.00155335	0.00389729	0.185	5.00563
1298.27	7.84	0.34	-0.811	2	0.1	0.213	3.99287	1.99287	0.00079059	0.00155335	0.00389729	0.185	5.00563
1299.26	7.86	0.34	-0.811	2	0.1	0.213	4.00306	2.00306	0.00079059	0.00155335	0.00389729	0.185	5.00563
1300.24	7.84	0.34	-0.811	2	0.1	0.213	3.99287	1.99287	0.00079059	0.00155335	0.00389729	0.19	5.14092
1301.22	7.86	0.34	-0.811	2	0.1	0.213	4.00306	2.00306	0.00079059	0.00155335	0.00389729	0.19	5.14092
1302.21	7.86	0.34	-0.811	2	0.1	0.213	4.00306	2.00306	0.00079059	0.00155335	0.00389729	0.19	5.14092
1303.19	7.86	0.34	-0.811	2	0.1	0.213	4.00306	2.00306	0.00079059	0.00155335	0.00389729	0.19	5.14092
1304.29	7.86	0.34	-0.811	2	0.1	0.213	4.00306	2.00306	0.00079059	0.00155335	0.00389729	0.19	5.14092
1305.27	7.84	0.34	-0.811	2	0.1	0.213	3.99287	1.99287	0.00079059	0.00155335	0.00389729	0.185	5.00563
1306.25	7.84	0.34	-0.811	2	0.1	0.213	3.99287	1.99287	0.00079059	0.00155335	0.00389729	0.19	5.14092
1307.24	7.84	0.34	-0.811	2	0.1	0.213	3.99287	1.99287	0.00079059	0.00155335	0.00389729	0.19	5.14092
1308.22	7.84	0.34	-0.811	2	0.1	0.213	3.99287	1.99287	0.00079059	0.00155335	0.00389729	0.19	5.14092
1309.21	7.84	0.34	-0.811	2	0.1	0.213	3.99287	1.99287	0.00079059	0.00155335	0.00389729	0.19	5.14092
1310.2	7.84	0.34	-0.811	2	0.1	0.213	3.99287	1.99287	0.00079059	0.00155335	0.00389729	0.19	5.14092
1311.29	7.84	0.34	-0.811	2	0.1	0.213	3.99287	1.99287	0.00079059	0.00155335	0.00389729	0.19	5.14092
1312.27	7.84	0.34	-0.811	2	0.1	0.213	3.99287	1.99287	0.00079059	0.00155335	0.00389729	0.19	5.14092
1313.26	7.86	0.34	-0.811	2	0.1	0.213	4.00306	2.00306	0.00079059	0.00155335	0.00389729	0.19	5.14092
1314.24	7.84	0.34	-0.811	2	0.1	0.213	3.99287	1.99287	0.00079059	0.00155335	0.00389729	0.19	5.14092
1315.22	7.84	0.34	-0.811	2	0.1	0.213	3.99287	1.99287	0.00079059	0.00155335	0.00389729	0.19	5.14092
1316.21	7.84	0.34	-0.811	2	0.1	0.213	3.99287	1.99287	0.00079059	0.00155335	0.00389729	0.19	5.14092
1317.19	7.84	0.34	-0.811	2	0.1	0.213	3.99287	1.99287	0.00079059	0.00155335	0.00389729	0.19	5.14092
1318.29	7.84	0.34	-0.811	2	0.1	0.213	3.99287	1.99287	0.00079059	0.00155335	0.00389729	0.19	5.14092
1319.27	7.84	0.34	-0.811	2	0.1	0.213	3.99287	1.99287	0.00079059	0.00155335	0.00389729	0.19	5.14092
1320.26	7.84	0.34	-0.811	1.995	0.1	0.213	3.99287	1.99787	0.00079059	0.00155335	0.00389729	0.19	5.14092
1321.24	7.84	0.34	-0.811	2	0.1	0.213	3.99287	1.99287	0.00079059	0.00155335	0.00389729	0.19	5.14092
1322.22	7.84	0.34	-0.811	2	0.1	0.213	3.99287	1.99287	0.00079059	0.00155335	0.00389729	0.19	5.14092
1323.21	7.86	0.34	-0.811	2	0.1	0.213	4.00306	2.00306	0.00079059	0.00155335	0.00389729	0.19	5.14092
1324.19	7.84	0.34	-0.811	2	0.1	0.213	3.99287	1.99287	0.00079059	0.00155335	0.00389729	0.19	5.14092
1325.29	7.84	0.34	-0.811	2	0.1	0.213	3.99287	1.99287	0.00079059	0.00155335	0.00389729	0.19	5.14092
1326.27	7.84	0.34	-0.811	2	0.1	0.213	3.99287	1.99287	0.00079059	0.00155335	0.00389729	0.19	5.14092
1327.26	7.84	0.34	-0.811	2	0.1	0.213	3.99287	1.99287	0.00079059	0.00155335	0.00389729	0.19	5.14092
1328.24	7.84	0.341	-0.811	2	0.1	0.213	3.99287	1.99287	0.000800231	0.00155335	0.00390694	0.19	5.14092
1329.23	7.84	0.341	-0.811	2	0.1	0.213	3.99287	1.99287	0.000800231	0.00155335	0.00390694	0.19	5.14092
1330.21	7.84	0.34	-0.811	2	0.1	0.213	3.99287	1.99287	0.00079059	0.00155335	0.00389729	0.19	5.14092
1331.19	7.84	0.34	-0.811	2	0.1	0.213	3.99287	1.99287	0.00079059	0.00155335	0.00389729	0.19	5.14092
1332.29	7.84	0.341	-0.811	2	0.1	0.213	3.99287	1.99287	0.000800231	0.00155335	0.00390694	0.195	5.27621
1333.27	7.84	0.341	-0.811	2	0.1	0.213	3.99287	1.99287	0.000800231	0.00155335	0.00390694	0.195	5.27621
1334.25	7.84	0.341	-0.811	2	0.1	0.213	3.99287	1.99287	0.000800231	0.00155335	0.00390694	0.195	5.27621
1335.24	7.84	0.34	-0.811	2	0.1	0.213	3.99287	1.99287	0.00079059	0.00155335	0.00389729	0.195	5.27621
1336.22	7.84	0.341	-0.811	1.995	0.1	0.213	3.99287	1.99787	0.000800231	0.00155335	0.00390694	0.19	5.14092
1337.21	7.84	0.341	-0.811	2	0.1	0.213	3.99287	1.99287	0.000800231	0.00155335	0.00390694	0.19	5.14092
1338.19	7.84	0.341	-0.811	1.995	0.1	0.213	3.99287	1.99787	0.000800231	0.00155335	0.00390694	0.19	5.14092
1339.29	7.84	0.341	-0.811	2	0.1	0.213	3.99287	1.99287	0.000800231	0.00155335	0.00390694	0.19	5.14092
1340.27	7.84	0.341	-0.811	1.995	0.1	0.213	3.99287	1.99787	0.000800231	0.00155335	0.00390694	0.19	5.14092
1341.26	7.86	0.341	-0.811	2	0.1	0.213	4.00306	2.00306	0.000800231	0.00155335	0.00390694	0.19	5.14092
1342.24	7.84	0.341	-0.811	2	0.1	0.213	3.99287	1.99287	0.000800231	0.00155335	0.00390694	0.19	5.14092
1343.22	7.84	0.341	-0.811	2.005	0.1	0.213	3.99287	1.98787	0.000800231	0.00155335	0.00390694	0.19	5.14092
1344.21	7.84	0.34	-0.811	2.005	0.1	0.213	3.99287	1.98787	0.00079059	0.00155335	0.00389729	0.19	5.14092
1345.2	7.84	0.341	-0.811	2	0.1	0.213	3.99287	1.99287	0.000800231	0.00155335	0.00390694	0.19	5.14092
1346.29	7.84	0.341	-0.811	2	0.1	0.213	3.99287	1.99287	0.000800231	0.00155335	0.00390694	0.19	5.14092
1347.27	7.84	0.341	-0.811	2	0.1	0.213	3.99287	1.99287	0.000800231	0.00155335	0.00390694	0.19	5.14092
1348.26	7.84	0.341	-0.811	2	0.1	0.213	3.99287	1.99287	0.000800231	0.00155335	0.00390694	0.19	5.14092
1349.24	7.86	0.341	-0.811	2	0.1	0.213	4.00306	2.00306	0.000800231	0.00155335	0.00390694	0.19	5.14092
1350.22	7.84	0.341	-0.811	2	0.1	0.213	3.99287	1.99287	0.000800231	0.00155335	0.00390694	0.19	5.14092
1351.21	7.84	0.341	-0.811	2	0.1	0.213	3.99287	1.99287	0.000800231	0.00155335	0.00390694	0.195	5.27621
1352.19	7.84	0.341	-0.811	2	0.1	0.213	3.99287	1.99287	0.000800231	0.00155335	0.00390694	0.195	5.27621
1353.29	7.84	0.341	-0.811	2	0.1	0.213	3.99287	1.99287	0.000800231	0.00155335	0.00390694	0.195	5.27621
1354.27	7.84	0.341	-0.811	2	0.1	0.213	3.99287	1.99287	0.000800231	0.00155335	0.00390694	0.19	5.14092
1355.26	7.86	0.341	-0.811	2	0.1	0.213	4.00306	2.00306	0.000800231	0.00155335	0.00390694	0.19	5.14092
1356.24	7.86	0.341	-0.811	2	0.1	0.213	4.00306	2.00306	0.000800231	0.00155335	0.00390694	0.19	5.14092
1357.22	7.86	0.341	-0.811	2	0.1	0.213	4.00306	2.00306	0.000800231	0.00155335	0.00390694	0.19	5.14092
1358.21	7.84	0.341	-0.811	2	0.1	0.213	3.99287	1.99287	0.000800231	0.00155335	0.00390694	0.19	5.14092
1359.19	7.86	0.341	-0.811	2	0.1	0.213	4.00306	2.00306	0.000800231	0.00155335	0.00390694	0.19	5.14092
1360.29	7.84	0.341	-0.811	2	0.1	0.213	3.99287	1.99287	0.000800231	0.00155335	0.00390694	0.19	5.14092
1361.27	7.84	0.341	-0.811	2	0.1	0.213	3.99287	1.99287	0.000800231	0.00155335	0.00390694	0.19	5.14092
1362.26	7.84	0.341	-0.811	2	0.1	0.213	3.99287	1.99287	0.000800231	0.00155335	0.00390694	0.195	5.27621
1363.24	7.84	0.341	-0.811	2	0.1	0.213	3.99287	1.99287	0.000800231	0.00155335	0.00390694	0.195	5.27621
1364.22	7.84	0.341	-0.811	2	0.1	0.213	3.99287	1.99287	0.000800231	0.00155335	0.00390694	0.195	5.27621
1365.21	7.84	0.341	-0.811	2	0.1	0.213	3.99287	1.99287	0.000800231	0.00155335	0.00390694	0.195	5.27621
1366.2	7.84	0.341	-0.811	2	0.1	0.213	3.99287	1.99287	0.000800231	0.00155335	0.00390694	0.195	5.27621
1367.29	7.84	0.341	-0.811	2	0.1	0.213	3.99287	1.99287	0.000800231	0.00155335	0.00390694	0.19	5.14092
1368.27	7.84	0.341	-0.811	2	0.1	0.213	3.99287	1.99287	0.000800231	0.00155335	0.00390694	0.19	5.14092
1369.26	7.84	0.341	-0.811	2	0.1	0.213	3.99287	1.99287	0.000800231	0.00155335	0.00390694	0.19	5.14092
1370.24	7.84	0.341	-0.811	2	0.1	0.213	3.99287	1.99287	0.000800231	0.00155335	0.00390694	0.19	5.14092
1371.22	7.84	0.341	-0.811	2	0.1	0.213	3.99287	1.99287	0.000800231	0.00155335	0.00390694	0.19	5.14092
1372.21	7.84	0.341	-0.811	2	0.1	0.213	3.99287	1.99287	0.000800231	0.00155335	0.00390694	0.19	5.14092
1373.19	7.86	0.341	-0.811	2	0.1	0.213	4.00306	2.00306	0.000800231	0.00155335	0.00390694	0.19	5.14092
1374.29	7.84	0.341	-0.811	2	0.1	0.213	3.99287	1.99287	0.000800231	0.00155335	0.00390694	0.19	5.14092
1375.27	7.84	0.341	-0.811	2	0.1	0.213	3.99287	1.99287	0.000800231	0.00155335	0.00390694	0.19	5.14092
1376.26	7.84	0.341	-0.811	2	0.1	0.213	3.99287	1.99287	0.000800231	0.00155335	0.00390694	0.19	5.14092
1377.24	7.84	0.341	-0.811	2	0.1	0.213	3.99287	1.99287	0.000800231	0.00155335	0.00390694	0.19	5.14092
1378.22	7.86	0.341	-0.811	2	0.1	0.213	4.00306	2.00306	0.000800231	0.00155335	0.00390694	0.19	5.14092
1379.21	7.94	0.343	-0.811	2	0.1	0.213	4.0438	2.0438	0.000819514	0.00155335	0.00392622	0.19	5.14092
1380.19	7.98	0.343	-0.811	2	0.1	0.213	4.06417	2.06417	0.000819514	0.00155335	0.00392622	0.19	5.14092
1381.29	8.06	0.345	-0.811	2	0.1	0.213	4.10491	2.10491	0.000838797	0.00155335	0.0039455	0.19	5.14092
1382.27	8.08	0.345	-0.811	2	0.1	0.213	4.1151	2.1151	0.000838797	0.00155335	0.0039455	0.19	5.14092
1383.25	8.14	0.345	-0.811	2	0.1	0.213	4.14566	2.14566	0.000838797	0.00155335	0.0039455	0.19	5.14092
1384.24	8.18	0.346	-0.811	2	0.1	0.213	4.16603	2.16603	0.000848438	0.00155335	0.00395514	0.19	5.14092
1385.22	8.24	0.346	-0.811	2	0.1	0.213	4.19659	2.19659	0.000848438	0.00155335	0.00395514	0.19	5.14092
1386.21	8.28	0.346	-0.811	2	0.1	0.213	4.21696	2.21696	0.000848438	0.00155335	0.00395514	0.19	5.14092
1387.19	8.34	0.348	-0.811	2	0.1	0.213	4.24752	2.24752	0.000867721	0.00155335	0.00397443	0.19	5.14092
1388.29	8.4	0.35	-0.811	2	0.1	0.213	4.27807	2.27807	0.000887003	0.00155335	0.00399371	0.19	5.14092
1389.27	8.46	0.35	-0.811	2	0.1	0.213	4.30863	2.30863	0.000887003	0.00155335	0.00399371	0.19	5.14092
1390.25	8.48	0.35	-0.811	1.995	0.1	0.213	4.31882	2.32382	0.000887003	0.00155335	0.00399371	0.19	5.14092
1391.24	8.54	0.351	-0.811	2	0.1	0.213	4.34938	2.34938	0.000896645	0.00155335	0.00400335	0.19	5.14092
1392.22	8.58	0.351	-0.812	1.995	0.1	0.213	4.36975	2.37475	0.000896645	0.00154699	0.00399062	0.19	5.14092
1393.21	8.64	0.351	-0.812	1.995	0.1	0.213	4.40031	2.40531	0.000896645	0.00154699	0.00399062	0.19	5.14092
1394.2	8.7	0.353	-0.812	2	0.1	0.213	4.43086	2.43086	0.000915927	0.00154699	0.0040099	0.19	5.14092
1395.29	8.74	0.355	-0.812	2	0.1	0.213	4.45124	2.45124	0.00093521	0.00154699	0.00402918	0.19	5.14092
1396.27	8.8	0.355	-0.812	2	0.1	0.213	4.48179	2.48179	0.00093521	0.00154699	0.00402918	0.19	5.14092
1397.25	8.86	0.356	-0.812	2	0.1	0.213	4.51235	2.51235	0.000944852	0.00154699	0.00403882	0.19	5.14092
1398.24	8.9	0.356	-0.812	2	0.1	0.213	4.53272	2.53272	0.000944852	0.00154699	0.00403882	0.19	5.14092
1399.23	8.96	0.356	-0.812	2.005	0.1	0.213	4.56328	2.55828	0.000944852	0.00154699	0.00403882	0.19	5.14092
1400.21	9	0.358	-0.812	2.005	0.1	0.213	4.58365	2.57865	0.000964134	0.00154699	0.00405811	0.19	5.14092
1401.19	9.04	0.358	-0.812	2	0.1	0.213	4.60402	2.60402	0.000964134	0.00154699	0.00405811	0.19	5.14092
1402.29	9.1	0.36	-0.813	2	0.1	0.213	4.63458	2.63458	0.000983417	0.00154062	0.00406466	0.19	5.14092
1403.27	9.16	0.36	-0.813	2	0.1	0.213	4.66514	2.66514	0.000983417	0.00154062	0.00406466	0.19	5.14092
1404.26	9.2	0.361	-0.813	2	0.1	0.213	4.68551	2.68551	0.000993058	0.00154062	0.0040743	0.19	5.14092
1405.24	9.26	0.363	-0.813	2	0.1	0.213	4.71607	2.71607	0.00101234	0.00154062	0.00409358	0.19	5.14092
1406.22	9.32	0.363	-0.813	2	0.1	0.213	4.74663	2.74663	0.00101234	0.00154062	0.00409358	0.19	5.14092
1407.21	9.36	0.363	-0.813	2	0.1	0.213	4.767	2.767	0.00101234	0.00154062	0.00409358	0.19	5.14092
1408.19	9.42	0.365	-0.813	2	0.1	0.213	4.79756	2.79756	0.00103162	0.00154062	0.00411286	0.19	5.14092
1409.29	9.46	0.365	-0.814	2.005	0.1	0.213	4.81793	2.81293	0.00103162	0.00153425	0.00410013	0.19	5.14092
1410.27	9.5	0.366	-0.814	2	0.1	0.213	4.8383	2.8383	0.00104126	0.00153425	0.00410977	0.19	5.14092
1411.26	9.56	0.366	-0.814	2	0.1	0.213	4.86886	2.86886	0.00104126	0.00153425	0.00410977	0.19	5.14092
1412.24	9.6	0.368	-0.814	2	0.1	0.213	4.88923	2.88923	0.00106055	0.00153425	0.00412905	0.19	5.14092
1413.22	9.66	0.368	-0.814	2	0.1	0.213	4.91979	2.91979	0.00106055	0.00153425	0.00412905	0.19	5.14092
1414.21	9.7	0.37	-0.814	2	0.1	0.213	4.94016	2.94016	0.00107983	0.00153425	0.00414834	0.19	5.14092
1415.2	9.76	0.371	-0.814	2	0.1	0.213	4.97072	2.97072	0.00108947	0.00153425	0.00415798	0.19	5.14092
1416.29	9.8	0.371	-0.814	2	0.1	0.213	4.99109	2.99109	0.00108947	0.00153425	0.00415798	0.19	5.14092
1417.27	9.86	0.371	-0.815	2	0.1	0.213	5.02165	3.02165	0.00108947	0.00152789	0.00414525	0.19	5.14092
1418.26	9.88	0.371	-0.815	2	0.1	0.213	5.03183	3.03183	0.00108947	0.00152789	0.00414525	0.19	5.14092
1419.24	9.96	0.373	-0.815	2	0.1	0.213	5.07257	3.07257	0.00110875	0.00152789	0.00416453	0.19	5.14092
1420.22	10	0.375	-0.815	2	0.1	0.213	5.09295	3.09295	0.00112804	0.00152789	0.00418381	0.19	5.14092
1421.21	10.04	0.375	-0.815	2	0.1	0.213	5.11332	3.11332	0.00112804	0.00152789	0.00418381	0.19	5.14092
1422.19	10.08	0.376	-0.815	2	0.1	0.213	5.13369	3.13369	0.00113768	0.00152789	0.00419345	0.19	5.14092
1423.29	10.16	0.378	-0.816	2	0.1	0.213	5.17443	3.17443	0.00115696	0.00152152	0.0042	0.19	5.14092
1424.27	10.2	0.378	-0.816	2	0.1	0.213	5.19481	3.19481	0.00115696	0.00152152	0.0042	0.19	5.14092
1425.26	10.26	0.378	-0.816	2	0.1	0.213	5.22536	3.22536	0.00115696	0.00152152	0.0042	0.19	5.14092
1426.24	10.3	0.38	-0.816	2	0.1	0.213	5.24573	3.24573	0.00117624	0.00152152	0.00421929	0.19	5.14092
1427.22	10.36	0.38	-0.816	2	0.1	0.213	5.27629	3.27629	0.00117624	0.00152152	0.00421929	0.19	5.14092
1428.21	10.4	0.381	-0.816	2	0.1	0.213	5.29666	3.29666	0.00118589	0.00152152	0.00422893	0.19	5.14092
1429.19	10.46	0.381	-0.817	2	0.1	0.213	5.32722	3.32722	0.00118589	0.00151516	0.0042162	0.19	5.14092
1430.29	10.5	0.383	-0.817	2	0.1	0.213	5.34759	3.34759	0.00120517	0.00151516	0.00423548	0.19	5.14092
1431.27	10.54	0.383	-0.817	2	0.1	0.213	5.36797	3.36797	0.00120517	0.00151516	0.00423548	0.19	5.14092
1432.26	10.6	0.385	-0.817	2	0.1	0.213	5.39852	3.39852	0.00122445	0.00151516	0.00425476	0.19	5.14092
1433.24	10.64	0.385	-0.817	2	0.1	0.213	5.41889	3.41889	0.00122445	0.00151516	0.00425476	0.19	5.14092
1434.22	10.7	0.386	-0.817	2	0.1	0.213	5.44945	3.44945	0.00123409	0.00151516	0.0042644	0.19	5.14092
1435.21	10.74	0.386	-0.817	2	0.1	0.213	5.46982	3.46982	0.00123409	0.00151516	0.0042644	0.19	5.14092
1436.19	10.8	0.388	-0.818	2	0.1	0.213	5.50038	3.50038	0.00125337	0.00150879	0.00427095	0.19	5.14092
1437.29	10.84	0.388	-0.818	2	0.1	0.213	5.52075	3.52075	0.00125337	0.00150879	0.00427095	0.19	5.14092
1438.27	10.9	0.39	-0.818	2	0.1	0.213	5.55131	3.55131	0.00127266	0.00150879	0.00429023	0.19	5.14092
1439.26	10.94	0.39	-0.818	2	0.1	0.213	5.57168	3.57168	0.00127266	0.00150879	0.00429023	0.19	5.14092
1440.24	11	0.391	-0.818	2	0.1	0.213	5.60224	3.60224	0.0012823	0.00150879	0.00429988	0.19	5.14092
1441.22	11.04	0.391	-0.819	2	0.1	0.213	5.62261	3.62261	0.0012823	0.00150242	0.00428714	0.19	5.14092
1442.21	11.1	0.393	-0.819	2	0.1	0.213	5.65317	3.65317	0.00130158	0.00150242	0.00430643	0.19	5.14092
1443.19	11.14	0.393	-0.819	2	0.1	0.213	5.67354	3.67354	0.00130158	0.00150242	0.00430643	0.185	5.00563
1444.29	11.22	0.395	-0.819	2	0.1	0.213	5.71429	3.71429	0.00132086	0.00150242	0.00432571	0.19	5.14092
1445.27	11.24	0.395	-0.819	2	0.1	0.213	5.72447	3.72447	0.00132086	0.00150242	0.00432571	0.185	5.00563
1446.26	11.28	0.396	-0.819	2	0.1	0.213	5.74484	3.74484	0.00133051	0.00150242	0.00433535	0.185	5.00563
1447.24	11.34	0.398	-0.82	2	0.1	0.213	5.7754	3.7754	0.00134979	0.00149606	0.0043419	0.19	5.14092
1448.22	11.38	0.398	-0.82	2	0.1	0.213	5.79577	3.79577	0.00134979	0.00149606	0.0043419	0.19	5.14092
1449.21	11.44	0.4	-0.82	2	0.1	0.213	5.82633	3.82633	0.00136907	0.00149606	0.00436118	0.185	5.00563
1450.2	11.48	0.4	-0.82	2	0.1	0.213	5.8467	3.8467	0.00136907	0.00149606	0.00436118	0.185	5.00563
1451.29	11.54	0.4	-0.82	2	0.1	0.213	5.87726	3.87726	0.00136907	0.00149606	0.00436118	0.185	5.00563
1452.27	11.6	0.401	-0.82	2	0.1	0.213	5.90782	3.90782	0.00137871	0.00149606	0.00437082	0.185	5.00563
1453.26	11.6	0.401	-0.821	2	0.1	0.213	5.90782	3.90782	0.00137871	0.00148969	0.00435809	0.185	5.00563
1454.24	11.62	0.401	-0.821	2	0.1	0.213	5.918	3.918	0.00137871	0.00148969	0.00435809	0.185	5.00563
1455.22	11.62	0.403	-0.821	2	0.1	0.213	5.918	3.918	0.00139799	0.00148969	0.00437738	0.185	5.00563
1456.21	11.62	0.403	-0.821	2	0.1	0.213	5.918	3.918	0.00139799	0.00148969	0.00437738	0.185	5.00563
1457.19	11.64	0.403	-0.821	2	0.1	0.213	5.92819	3.92819	0.00139799	0.00148969	0.00437738	0.185	5.00563
1458.29	11.64	0.403	-0.821	2	0.1	0.213	5.92819	3.92819	0.00139799	0.00148969	0.00437738	0.185	5.00563
1459.27	11.64	0.403	-0.821	2	0.1	0.213	5.92819	3.92819	0.00139799	0.00148969	0.00437738	0.185	5.00563
1460.25	11.66	0.405	-0.821	2	0.1	0.213	5.93838	3.93838	0.00141728	0.00148969	0.00439666	0.185	5.00563
1461.24	11.66	0.403	-0.821	2	0.1	0.213	5.93838	3.93838	0.00139799	0.00148969	0.00437738	0.185	5.00563
1462.22	11.66	0.405	-0.821	2	0.1	0.213	5.93838	3.93838	0.00141728	0.00148969	0.00439666	0.185	5.00563
1463.21	11.68	0.405	-0.821	2	0.1	0.213	5.94856	3.94856	0.00141728	0.00148969	0.00439666	0.185	5.00563
1464.19	11.66	0.403	-0.821	1.995	0.1	0.213	5.93838	3.94338	0.00139799	0.00148969	0.00437738	0.185	5.00563
1465.29	11.68	0.405	-0.822	1.995	0.1	0.213	5.94856	3.95356	0.00141728	0.00148332	0.00438393	0.185	5.00563
1466.27	11.66	0.405	-0.822	1.995	0.1	0.213	5.93838	3.94338	0.00141728	0.00148332	0.00438393	0.185	5.00563
1467.26	11.68	0.405	-0.822	1.995	0.1	0.213	5.94856	3.95356	0.00141728	0.00148332	0.00438393	0.185	5.00563
1468.24	11.68	0.405	-0.822	2	0.1	0.213	5.94856	3.94856	0.00141728	0.00148332	0.00438393	0.185	5.00563
1469.22	11.68	0.405	-0.822	2	0.1	0.213	5.94856	3.94856	0.00141728	0.00148332	0.00438393	0.185	5.00563
1470.21	11.68	0.405	-0.822	2	0.1	0.213	5.94856	3.94856	0.00141728	0.00148332	0.00438393	0.185	5.00563
1471.2	11.7	0.405	-0.822	2	0.1	0.213	5.95875	3.95875	0.00141728	0.00148332	0.00438393	0.185	5.00563
1472.29	11.7	0.405	-0.822	2	0.1	0.213	5.95875	3.95875	0.00141728	0.00148332	0.00438393	0.185	5.00563
1473.27	11.7	0.405	-0.822	2	0.1	0.213	5.95875	3.95875	0.00141728	0.00148332	0.00438393	0.185	5.00563
1474.26	11.72	0.406	-0.822	2	0.1	0.213	5.96893	3.96893	0.00142692	0.00148332	0.00439357	0.185	5.00563
1475.24	11.74	0.406	-0.822	2	0.1	0.213	5.97912	3.97912	0.00142692	0.00148332	0.00439357	0.185	5.00563
1476.22	11.74	0.406	-0.822	2	0.1	0.213	5.97912	3.97912	0.00142692	0.00148332	0.00439357	0.185	5.00563
1477.21	11.74	0.406	-0.822	2	0.1	0.213	5.97912	3.97912	0.00142692	0.00148332	0.00439357	0.185	5.00563
1478.19	11.74	0.406	-0.822	2	0.1	0.213	5.97912	3.97912	0.00142692	0.00148332	0.00439357	0.185	5.00563
1479.29	11.74	0.406	-0.822	2	0.1	0.213	5.97912	3.97912	0.00142692	0.00148332	0.00439357	0.185	5.00563
1480.27	11.74	0.406	-0.822	2	0.1	0.213	5.97912	3.97912	0.00142692	0.00148332	0.00439357	0.185	5.00563
1481.25	11.74	0.406	-0.822	2	0.1	0.213	5.97912	3.97912	0.00142692	0.00148332	0.00439357	0.185	5.00563
1482.24	11.74	0.406	-0.822	2	0.1	0.213	5.97912	3.97912	0.00142692	0.00148332	0.00439357	0.185	5.00563
1483.22	11.76	0.406	-0.822	2	0.1	0.213	5.9893	3.9893	0.00142692	0.00148332	0.00439357	0.185	5.00563
1484.21	11.76	0.406	-0.822	2	0.1	0.213	5.9893	3.9893	0.00142692	0.00148332	0.00439357	0.185	5.00563
1485.19	11.76	0.406	-0.822	2	0.1	0.213	5.9893	3.9893	0.00142692	0.00148332	0.00439357	0.185	5.00563
1486.29	11.76	0.406	-0.822	2	0.1	0.213	5.9893	3.9893	0.00142692	0.00148332	0.00439357	0.185	5.00563
1487.27	11.76	0.406	-0.822	2	0.1	0.213	5.9893	3.9893	0.00142692	0.00148332	0.00439357	0.185	5.00563
1488.25	11.76	0.406	-0.822	2	0.1	0.213	5.9893	3.9893	0.00142692	0.00148332	0.00439357	0.185	5.00563
1489.24	11.76	0.406	-0.822	2.005	0.1	0.213	5.9893	3.9843	0.00142692	0.00148332	0.00439357	0.185	5.00563
1490.22	11.76	0.406	-0.822	2.005	0.1	0.213	5.9893	3.9843	0.00142692	0.00148332	0.00439357	0.185	5.00563
1491.21	11.76	0.406	-0.822	2	0.1	0.213	5.9893	3.9893	0.00142692	0.00148332	0.00439357	0.185	5.00563
1492.19	11.76	0.406	-0.822	2	0.1	0.213	5.9893	3.9893	0.00142692	0.00148332	0.00439357	0.185	5.00563
1493.29	11.78	0.406	-0.822	2	0.1	0.213	5.99949	3.99949	0.00142692	0.00148332	0.00439357	0.185	5.00563
1494.27	11.78	0.406	-0.822	2	0.1	0.213	5.99949	3.99949	0.00142692	0.00148332	0.00439357	0.185	5.00563
1495.25	11.78	0.406	-0.822	2	0.1	0.213	5.99949	3.99949	0.00142692	0.00148332	0.00439357	0.185	5.00563
1496.24	11.78	0.408	-0.822	2	0.1	0.213	5.99949	3.99949	0.0014462	0.00148332	0.00441285	0.185	5.00563
1497.22	11.78	0.406	-0.822	2	0.1	0.213	5.99949	3.99949	0.00142692	0.00148332	0.00439357	0.185	5.00563
1498.21	11.78	0.408	-0.822	2	0.1	0.213	5.99949	3.99949	0.0014462	0.00148332	0.00441285	0.185	5.00563
1499.19	11.78	0.406	-0.822	2	0.1	0.213	5.99949	3.99949	0.00142692	0.00148332	0.00439357	0.185	5.00563
1500.29	11.78	0.406	-0.822	2	0.1	0.213	5.99949	3.99949	0.00142692	0.00148332	0.00439357	0.185	5.00563
1501.27	11.78	0.408	-0.822	2	0.1	0.213	5.99949	3.99949	0.0014462	0.00148332	0.00441285	0.185	5.00563
1502.26	11.78	0.408	-0.822	2	0.1	0.213	5.99949	3.99949	0.0014462	0.00148332	0.00441285	0.185	5.00563
1503.24	11.78	0.408	-0.822	2	0.1	0.213	5.99949	3.99949	0.0014462	0.00148332	0.00441285	0.185	5.00563
1504.23	11.78	0.408	-0.822	2	0.1	0.213	5.99949	3.99949	0.0014462	0.00148332	0.00441285	0.185	5.00563
1505.21	11.78	0.408	-0.822	2	0.1	0.213	5.99949	3.99949	0.0014462	0.00148332	0.00441285	0.185	5.00563
1506.2	11.78	0.406	-0.822	2	0.1	0.213	5.99949	3.99949	0.00142692	0.00148332	0.00439357	0.185	5.00563
1507.29	11.78	0.408	-0.822	2	0.1	0.213	5.99949	3.99949	0.0014462	0.00148332	0.00441285	0.185	5.00563
1508.27	11.78	0.408	-0.822	2	0.1	0.213	5.99949	3.99949	0.0014462	0.00148332	0.00441285	0.185	5.00563
1509.26	11.78	0.408	-0.822	2	0.1	0.213	5.99949	3.99949	0.0014462	0.00148332	0.00441285	0.185	5.00563
1510.24	11.78	0.408	-0.822	2	0.1	0.213	5.99949	3.99949	0.0014462	0.00148332	0.00441285	0.185	5.00563
1511.22	11.78	0.408	-0.822	2	0.1	0.213	5.99949	3.99949	0.0014462	0.00148332	0.00441285	0.185	5.00563
1512.21	11.78	0.408	-0.822	2	0.1	0.213	5.99949	3.99949	0.0014462	0.00148332	0.00441285	0.185	5.00563
1513.19	11.78	0.408	-0.822	2	0.1	0.213	5.99949	3.99949	0.0014462	0.00148332	0.00441285	0.185	5.00563
1514.29	11.8	0.408	-0.822	2	0.1	0.213	6.00968	4.00968	0.0014462	0.00148332	0.00441285	0.185	5.00563
1515.27	11.78	0.408	-0.822	2	0.1	0.213	5.99949	3.99949	0.0014462	0.00148332	0.00441285	0.185	5.00563
1516.26	11.78	0.408	-0.822	2	0.1	0.213	5.99949	3.99949	0.0014462	0.00148332	0.00441285	0.185	5.00563
1517.24	11.78	0.408	-0.822	2	0.1	0.213	5.99949	3.99949	0.0014462	0.00148332	0.00441285	0.185	5.00563
1518.22	11.78	0.408	-0.822	2	0.1	0.213	5.99949	3.99949	0.0014462	0.00148332	0.00441285	0.185	5.00563
1519.21	11.78	0.408	-0.822	2	0.1	0.213	5.99949	3.99949	0.0014462	0.00148332	0.00441285	0.185	5.00563
1520.19	11.78	0.408	-0.822	2	0.1	0.213	5.99949	3.99949	0.0014462	0.00148332	0.00441285	0.185	5.00563
1521.29	11.78	0.408	-0.822	2	0.1	0.213	5.99949	3.99949	0.0014462	0.00148332	0.00441285	0.185	5.00563
1522.27	11.78	0.408	-0.822	2	0.1	0.213	5.99949	3.99949	0.0014462	0.00148332	0.00441285	0.185	5.00563
1523.26	11.78	0.408	-0.822	2	0.1	0.213	5.99949	3.99949	0.0014462	0.00148332	0.00441285	0.185	5.00563
1524.24	11.78	0.408	-0.822	2	0.1	0.213	5.99949	3.99949	0.0014462	0.00148332	0.00441285	0.185	5.00563
1525.22	11.78	0.408	-0.822	2	0.1	0.213	5.99949	3.99949	0.0014462	0.00148332	0.00441285	0.185	5.00563
1526.21	11.78	0.408	-0.822	2	0.1	0.213	5.99949	3.99949	0.0014462	0.00148332	0.00441285	0.185	5.00563
1527.19	11.78	0.408	-0.822	2	0.1	0.213	5.99949	3.99949	0.0014462	0.00148332	0.00441285	0.185	5.00563
1528.29	11.78	0.408	-0.822	2	0.1	0.213	5.99949	3.99949	0.0014462	0.00148332	0.00441285	0.185	5.00563
1529.27	11.78	0.408	-0.822	2	0.1	0.213	5.99949	3.99949	0.0014462	0.00148332	0.00441285	0.185	5.00563
1530.25	11.78	0.408	-0.822	2	0.1	0.213	5.99949	3.99949	0.0014462	0.00148332	0.00441285	0.185	5.00563
1531.24	11.78	0.408	-0.822	2	0.1	0.213	5.99949	3.99949	0.0014462	0.00148332	0.00441285	0.185	5.00563
1532.22	11.78	0.408	-0.822	2	0.1	0.213	5.99949	3.99949	0.0014462	0.00148332	0.00441285	0.185	5.00563
1533.21	11.78	0.408	-0.822	2	0.1	0.213	5.99949	3.99949	0.0014462	0.00148332	0.00441285	0.185	5.00563
1534.19	11.78	0.408	-0.822	2	0.1	0.213	5.99949	3.99949	0.0014462	0.00148332	0.00441285	0.185	5.00563
1535.29	11.76	0.408	-0.822	1.995	0.1	0.213	5.9893	3.9943	0.0014462	0.00148332	0.00441285	0.185	5.00563
1536.27	11.76	0.408	-0.822	1.995	0.1	0.213	5.9893	3.9943	0.0014462	0.00148332	0.00441285	0.185	5.00563
1537.25	11.76	0.408	-0.822	1.995	0.1	0.213	5.9893	3.9943	0.0014462	0.00148332	0.00441285	0.185	5.00563
1538.24	11.76	0.408	-0.822	2	0.1	0.213	5.9893	3.9893	0.0014462	0.00148332	0.00441285	0.185	5.00563
1539.22	11.76	0.408	-0.822	2	0.1	0.213	5.9893	3.9893	0.0014462	0.00148332	0.00441285	0.185	5.00563
1540.21	11.76	0.41	-0.822	2	0.1	0.213	5.9893	3.9893	0.00146548	0.00148332	0.00443213	0.185	5.00563
1541.2	11.76	0.408	-0.822	2	0.1	0.213	5.9893	3.9893	0.0014462	0.00148332	0.00441285	0.185	5.00563
1542.29	11.76	0.41	-0.822	2	0.1	0.213	5.9893	3.9893	0.00146548	0.00148332	0.00443213	0.185	5.00563
1543.27	11.76	0.408	-0.822	2	0.1	0.213	5.9893	3.9893	0.0014462	0.00148332	0.00441285	0.185	5.00563
1544.26	11.78	0.408	-0.822	2	0.1	0.213	5.99949	3.99949	0.0014462	0.00148332	0.00441285	0.185	5.00563
1545.24	11.78	0.41	-0.822	2	0.1	0.213	5.99949	3.99949	0.00146548	0.00148332	0.00443213	0.185	5.00563
1546.22	11.78	0.408	-0.822	2	0.1	0.213	5.99949	3.99949	0.0014462	0.00148332	0.00441285	0.185	5.00563
1547.21	11.78	0.41	-0.822	2	0.1	0.213	5.99949	3.99949	0.00146548	0.00148332	0.00443213	0.185	5.00563
1548.19	11.78	0.41	-0.822	2	0.1	0.213	5.99949	3.99949	0.00146548	0.00148332	0.00443213	0.185	5.00563
1549.29	11.8	0.408	-0.822	2	0.1	0.213	6.00968	4.00968	0.0014462	0.00148332	0.00441285	0.185	5.00563
1550.27	11.8	0.41	-0.822	2	0.1	0.213	6.00968	4.00968	0.00146548	0.00148332	0.00443213	0.185	5.00563
1551.26	11.78	0.41	-0.822	2	0.1	0.213	5.99949	3.99949	0.00146548	0.00148332	0.00443213	0.185	5.00563
1552.24	11.8	0.41	-0.822	2	0.1	0.213	6.00968	4.00968	0.00146548	0.00148332	0.00443213	0.185	5.00563
1553.22	11.78	0.41	-0.822	2	0.1	0.213	5.99949	3.99949	0.00146548	0.00148332	0.00443213	0.185	5.00563
1554.21	11.78	0.41	-0.822	2	0.1	0.213	5.99949	3.99949	0.00146548	0.00148332	0.00443213	0.185	5.00563
1555.19	11.78	0.41	-0.822	2	0.1	0.213	5.99949	3.99949	0.00146548	0.00148332	0.00443213	0.185	5.00563
1556.29	11.78	0.41	-0.822	2	0.1	0.213	5.99949	3.99949	0.00146548	0.00148332	0.00443213	0.185	5.00563
1557.27	11.78	0.41	-0.822	2	0.1	0.213	5.99949	3.99949	0.00146548	0.00148332	0.00443213	0.185	5.00563
1558.26	11.78	0.41	-0.822	2	0.1	0.213	5.99949	3.99949	0.00146548	0.00148332	0.00443213	0.185	5.00563
1559.24	11.78	0.41	-0.822	2	0.1	0.213	5.99949	3.99949	0.00146548	0.00148332	0.00443213	0.185	5.00563
1560.22	11.78	0.41	-0.822	2	0.1	0.213	5.99949	3.99949	0.00146548	0.00148332	0.00443213	0.185	5.00563
1561.21	11.78	0.41	-0.822	2	0.1	0.213	5.99949	3.99949	0.00146548	0.00148332	0.00443213	0.185	5.00563
1562.19	11.78	0.41	-0.822	2	0.1	0.213	5.99949	3.99949	0.00146548	0.00148332	0.00443213	0.185	5.00563
1563.29	11.78	0.41	-0.822	2	0.1	0.213	5.99949	3.99949	0.00146548	0.00148332	0.00443213	0.185	5.00563
1564.27	11.78	0.41	-0.822	2	0.1	0.213	5.99949	3.99949	0.00146548	0.00148332	0.00443213	0.185	5.00563
1565.25	11.78	0.41	-0.822	2	0.1	0.213	5.99949	3.99949	0.00146548	0.00148332	0.00443213	0.185	5.00563
1566.24	11.78	0.41	-0.822	2	0.1	0.213	5.99949	3.99949	0.00146548	0.00148332	0.00443213	0.185	5.00563
1567.22	11.78	0.41	-0.822	2	0.1	0.213	5.99949	3.99949	0.00146548	0.00148332	0.00443213	0.185	5.00563
1568.21	11.78	0.41	-0.822	2.005	0.1	0.213	5.99949	3.99449	0.00146548	0.00148332	0.00443213	0.185	5.00563
1569.19	11.78	0.41	-0.822	2.005	0.1	0.213	5.99949	3.99449	0.00146548	0.00148332	0.00443213	0.185	5.00563
1570.29	11.78	0.41	-0.822	2.005	0.1	0.213	5.99949	3.99449	0.00146548	0.00148332	0.00443213	0.185	5.00563
1571.27	11.78	0.41	-0.822	2	0.1	0.213	5.99949	3.99949	0.00146548	0.00148332	0.00443213	0.185	5.00563
1572.26	11.78	0.41	-0.822	2	0.1	0.213	5.99949	3.99949	0.00146548	0.00148332	0.00443213	0.185	5.00563
1573.24	11.78	0.41	-0.822	2	0.1	0.213	5.99949	3.99949	0.00146548	0.00148332	0.00443213	0.185	5.00563
1574.23	11.78	0.41	-0.822	2	0.1	0.213	5.99949	3.99949	0.00146548	0.00148332	0.00443213	0.185	5.00563
1575.21	11.78	0.41	-0.822	2	0.1	0.213	5.99949	3.99949	0.00146548	0.00148332	0.00443213	0.185	5.00563
1576.19	11.78	0.41	-0.822	2	0.1	0.213	5.99949	3.99949	0.00146548	0.00148332	0.00443213	0.185	5.00563
1577.29	11.78	0.41	-0.822	2	0.1	0.213	5.99949	3.99949	0.00146548	0.00148332	0.00443213	0.185	5.00563
1578.27	11.78	0.41	-0.822	2	0.1	0.213	5.99949	3.99949	0.00146548	0.00148332	0.00443213	0.185	5.00563
1579.26	11.78	0.41	-0.822	2	0.1	0.213	5.99949	3.99949	0.00146548	0.00148332	0.00443213	0.185	5.00563
1580.24	11.78	0.41	-0.822	2	0.1	0.213	5.99949	3.99949	0.00146548	0.00148332	0.00443213	0.185	5.00563
1581.22	11.78	0.41	-0.822	1.995	0.1	0.213	5.99949	4.00449	0.00146548	0.00148332	0.00443213	0.185	5.00563
1582.21	11.78	0.41	-0.822	2	0.1	0.213	5.99949	3.99949	0.00146548	0.00148332	0.00443213	0.185	5.00563
1583.2	11.78	0.41	-0.822	2	0.1	0.213	5.99949	3.99949	0.00146548	0.00148332	0.00443213	0.185	5.00563
1584.29	11.78	0.41	-0.822	2	0.1	0.213	5.99949	3.99949	0.00146548	0.00148332	0.00443213	0.185	5.00563
1585.27	11.78	0.41	-0.822	2	0.1	0.213	5.99949	3.99949	0.00146548	0.00148332	0.00443213	0.185	5.00563
1586.25	11.78	0.41	-0.822	2	0.1	0.213	5.99949	3.99949	0.00146548	0.00148332	0.00443213	0.185	5.00563
1587.24	11.78	0.41	-0.822	2	0.1	0.213	5.99949	3.99949	0.00146548	0.00148332	0.00443213	0.185	5.00563
1588.22	11.78	0.41	-0.822	2	0.1	0.213	5.99949	3.99949	0.00146548	0.00148332	0.00443213	0.185	5.00563
1589.21	11.78	0.41	-0.822	2	0.1	0.213	5.99949	3.99949	0.00146548	0.00148332	0.00443213	0.185	5.00563
1590.2	11.78	0.41	-0.822	2	0.1	0.213	5.99949	3.99949	0.00146548	0.00148332	0.00443213	0.185	5.00563
1591.29	11.78	0.41	-0.822	1.995	0.1	0.213	5.99949	4.00449	0.00146548	0.00148332	0.00443213	0.185	5.00563
1592.27	11.78	0.41	-0.822	2	0.1	0.213	5.99949	3.99949	0.00146548	0.00148332	0.00443213	0.185	5.00563
1593.26	11.78	0.412	-0.822	1.995	0.1	0.213	5.99949	4.00449	0.00148477	0.00148332	0.00445141	0.185	5.00563
1594.24	11.78	0.412	-0.822	2	0.1	0.213	5.99949	3.99949	0.00148477	0.00148332	0.00445141	0.185	5.00563
1595.22	11.78	0.41	-0.822	1.995	0.1	0.213	5.99949	4.00449	0.00146548	0.00148332	0.00443213	0.185	5.00563
1596.21	11.78	0.41	-0.822	1.995	0.1	0.213	5.99949	4.00449	0.00146548	0.00148332	0.00443213	0.185	5.00563
1597.2	11.78	0.41	-0.822	1.995	0.1	0.213	5.99949	4.00449	0.00146548	0.00148332	0.00443213	0.185	5.00563
1598.29	11.78	0.412	-0.822	2	0.1	0.213	5.99949	3.99949	0.00148477	0.00148332	0.00445141	0.185	5.00563
1599.27	11.78	0.41	-0.822	2	0.1	0.213	5.99949	3.99949	0.00146548	0.00148332	0.00443213	0.185	5.00563
1600.26	11.78	0.41	-0.822	2.005	0.1	0.213	5.99949	3.99449	0.00146548	0.00148332	0.00443213	0.185	5.00563
1601.24	11.78	0.41	-0.822	2	0.1	0.213	5.99949	3.99949	0.00146548	0.00148332	0.00443213	0.185	5.00563
1602.22	11.78	0.41	-0.822	2.005	0.1	0.213	5.99949	3.99449	0.00146548	0.00148332	0.00443213	0.185	5.00563
1603.21	11.78	0.41	-0.822	2	0.1	0.213	5.99949	3.99949	0.00146548	0.00148332	0.00443213	0.185	5.00563
1604.19	11.78	0.412	-0.822	2.01	0.1	0.213	5.99949	3.98949	0.00148477	0.00148332	0.00445141	0.185	5.00563
1605.29	11.78	0.41	-0.822	2.045	0.1	0.213	5.99949	3.95449	0.00146548	0.00148332	0.00443213	0.185	5.00563
1606.27	11.78	0.41	-0.822	2.06	0.1	0.213	5.99949	3.93949	0.00146548	0.00148332	0.00443213	0.185	5.00563
1607.26	11.78	0.412	-0.821	2.09	0.1	0.213	5.99949	3.90949	0.00148477	0.00148969	0.00446415	0.185	5.00563
1608.24	11.78	0.412	-0.821	2.145	0.1	0.213	5.99949	3.85449	0.00148477	0.00148969	0.00446415	0.185	5.00563
1609.22	11.78	0.412	-0.82	2.2	0.1	0.213	5.99949	3.79949	0.00148477	0.00149606	0.00447688	0.18	4.87034
1610.21	11.78	0.41	-0.82	2.27	0.1	0.213	5.99949	3.72949	0.00146548	0.00149606	0.0044576	0.18	4.87034
1611.19	11.78	0.41	-0.819	2.33	0.1	0.213	5.99949	3.66949	0.00146548	0.00150242	0.00447033	0.175	4.73506
1612.29	11.78	0.412	-0.818	2.4	0.1	0.213	5.99949	3.59949	0.00148477	0.00150879	0.00450234	0.175	4.73506
1613.27	11.78	0.412	-0.817	2.445	0.1	0.213	5.99949	3.55449	0.00148477	0.00151516	0.00451508	0.17	4.59977
1614.26	11.78	0.412	-0.816	2.495	0.1	0.213	5.99949	3.50449	0.00148477	0.00152152	0.00452781	0.17	4.59977
1615.24	11.78	0.412	-0.815	2.55	0.1	0.213	5.99949	3.44949	0.00148477	0.00152789	0.00454054	0.16	4.32919
1616.22	11.78	0.412	-0.815	2.61	0.1	0.213	5.99949	3.38949	0.00148477	0.00152789	0.00454054	0.16	4.32919
1617.21	11.78	0.412	-0.814	2.645	0.1	0.213	5.99949	3.35449	0.00148477	0.00153425	0.00455327	0.155	4.19391
1618.19	11.78	0.412	-0.813	2.695	0.1	0.213	5.99949	3.30449	0.00148477	0.00154062	0.00456601	0.155	4.19391
1619.29	11.78	0.412	-0.813	2.735	0.1	0.213	5.99949	3.26449	0.00148477	0.00154062	0.00456601	0.15	4.05862
1620.27	11.78	0.412	-0.812	2.79	0.1	0.213	5.99949	3.20949	0.00148477	0.00154699	0.00457874	0.15	4.05862
1621.26	11.78	0.412	-0.812	2.84	0.1	0.213	5.99949	3.15949	0.00148477	0.00154699	0.00457874	0.145	3.92333
1622.24	11.78	0.412	-0.811	2.885	0.1	0.213	5.99949	3.11449	0.00148477	0.00155335	0.00459147	0.145	3.92333
1623.22	11.78	0.412	-0.811	2.93	0.1	0.213	5.99949	3.06949	0.00148477	0.00155335	0.00459147	0.145	3.92333
1624.21	11.78	0.412	-0.81	2.985	0.1	0.213	5.99949	3.01449	0.00148477	0.00155972	0.0046042	0.14	3.78805
1625.2	11.78	0.412	-0.81	3.025	0.1	0.213	5.99949	2.97449	0.00148477	0.00155972	0.0046042	0.135	3.65276
1626.29	11.78	0.412	-0.809	3.09	0.1	0.213	5.99949	2.90949	0.00148477	0.00156608	0.00461694	0.135	3.65276
1627.27	11.78	0.412	-0.808	3.14	0.1	0.213	5.99949	2.85949	0.00148477	0.00157245	0.00462967	0.135	3.65276
1628.25	11.78	0.412	-0.808	3.195	0.1	0.213	5.99949	2.80449	0.00148477	0.00157245	0.00462967	0.13	3.51747
1629.24	11.78	0.412	-0.807	3.235	0.1	0.213	5.99949	2.76449	0.00148477	0.00157882	0.0046424	0.13	3.51747
1630.22	11.78	0.412	-0.806	3.285	0.1	0.213	5.99949	2.71449	0.00148477	0.00158518	0.00465513	0.125	3.38218
1631.21	11.78	0.412	-0.806	3.335	0.1	0.213	5.99949	2.66449	0.00148477	0.00158518	0.00465513	0.125	3.38218
1632.19	11.78	0.412	-0.805	3.385	0.1	0.213	5.99949	2.61449	0.00148477	0.00159155	0.00466787	0.12	3.2469
1633.29	11.78	0.412	-0.804	3.45	0.1	0.213	5.99949	2.54949	0.00148477	0.00159792	0.0046806	0.12	3.2469
1634.27	11.78	0.412	-0.804	3.495	0.1	0.213	5.99949	2.50449	0.00148477	0.00159792	0.0046806	0.12	3.2469
1635.26	11.78	0.412	-0.803	3.54	0.1	0.213	5.99949	2.45949	0.00148477	0.00160428	0.00469333	0.115	3.11161
1636.24	11.78	0.412	-0.802	3.59	0.1	0.213	5.99949	2.40949	0.00148477	0.00161065	0.00470606	0.115	3.11161
1637.22	11.78	0.412	-0.802	3.635	0.1	0.213	5.99949	2.36449	0.00148477	0.00161065	0.00470606	0.115	3.11161
1638.21	11.78	0.412	-0.801	3.685	0.1	0.213	5.99949	2.31449	0.00148477	0.00161701	0.0047188	0.11	2.97632
1639.19	11.78	0.412	-0.8	3.74	0.1	0.213	5.99949	2.25949	0.00148477	0.00162338	0.00473153	0.11	2.97632
1640.29	11.8	0.412	-0.799	3.795	0.1	0.213	6.00968	2.21468	0.00148477	0.00162975	0.00474426	0.105	2.84103
1641.27	11.8	0.412	-0.799	3.835	0.1	0.213	6.00968	2.17468	0.00148477	0.00162975	0.00474426	0.105	2.84103
1642.26	11.8	0.412	-0.798	3.895	0.1	0.213	6.00968	2.11468	0.00148477	0.00163611	0.00475699	0.105	2.84103
1643.24	11.78	0.412	-0.797	3.935	0.1	0.213	5.99949	2.06449	0.00148477	0.00164248	0.00476972	0.1	2.70575
1644.22	11.8	0.412	-0.796	3.995	0.1	0.213	6.00968	2.01468	0.00148477	0.00164885	0.00478246	0.1	2.70575
1645.21	11.78	0.413	-0.796	4.035	0.1	0.213	5.99949	1.96449	0.00149441	0.00164885	0.0047921	0.1	2.70575
1646.2	11.8	0.412	-0.795	4.09	0.1	0.213	6.00968	1.91968	0.00148477	0.00165521	0.00479519	0.1	2.70575
1647.29	11.78	0.412	-0.794	4.14	0.1	0.213	5.99949	1.85949	0.00148477	0.00166158	0.00480792	0.1	2.70575
1648.27	11.78	0.413	-0.793	4.195	0.1	0.213	5.99949	1.80449	0.00149441	0.00166794	0.0048303	0.095	2.57046
1649.26	11.78	0.412	-0.792	4.24	0.1	0.213	5.99949	1.75949	0.00148477	0.00167431	0.00483339	0.095	2.57046
1650.24	11.78	0.413	-0.792	4.285	0.1	0.213	5.99949	1.71449	0.00149441	0.00167431	0.00484303	0.095	2.57046
1651.22	11.76	0.413	-0.791	4.335	0.1	0.213	5.9893	1.6543	0.00149441	0.00168068	0.00485576	0.09	2.43517
1652.21	11.78	0.412	-0.79	4.39	0.1	0.213	5.99949	1.60949	0.00148477	0.00168704	0.00485885	0.09	2.43517
1653.19	11.76	0.413	-0.789	4.435	0.1	0.213	5.9893	1.5543	0.00149441	0.00169341	0.00488123	0.09	2.43517
1654.29	11.78	0.413	-0.788	4.49	0.1	0.213	5.99949	1.50949	0.00149441	0.00169977	0.00489396	0.09	2.43517
1655.27	11.78	0.413	-0.787	4.54	0.1	0.213	5.99949	1.45949	0.00149441	0.00170614	0.00490669	0.085	2.29988
1656.25	11.78	0.413	-0.786	4.595	0.1	0.213	5.99949	1.40449	0.00149441	0.00171251	0.00491942	0.085	2.29988
1657.24	11.78	0.413	-0.786	4.63	0.1	0.213	5.99949	1.36949	0.00149441	0.00171251	0.00491942	0.085	2.29988
1658.22	11.8	0.413	-0.785	4.69	0.1	0.213	6.00968	1.31968	0.00149441	0.00171887	0.00493215	0.085	2.29988
1659.21	11.78	0.413	-0.784	4.73	0.1	0.213	5.99949	1.26949	0.00149441	0.00172524	0.00494489	0.085	2.29988
1660.19	11.78	0.413	-0.783	4.785	0.1	0.213	5.99949	1.21449	0.00149441	0.00173161	0.00495762	0.08	2.1646
1661.29	11.76	0.413	-0.782	4.84	0.1	0.213	5.9893	1.1493	0.00149441	0.00173797	0.00497035	0.08	2.1646
1662.27	11.76	0.413	-0.781	4.895	0.1	0.213	5.9893	1.0943	0.00149441	0.00174434	0.00498308	0.08	2.1646
1663.26	11.76	0.413	-0.781	4.94	0.1	0.213	5.9893	1.0493	0.00149441	0.00174434	0.00498308	0.08	2.1646
1664.24	11.78	0.413	-0.78	4.985	0.1	0.213	5.99949	1.01449	0.00149441	0.0017507	0.00499582	0.08	2.1646
1665.22	11.78	0.413	-0.779	5.045	0.1	0.213	5.99949	0.954491	0.00149441	0.00175707	0.00500855	0.075	2.02931
1666.21	11.78	0.413	-0.778	5.085	0.1	0.213	5.99949	0.914491	0.00149441	0.00176344	0.00502128	0.075	2.02931
1667.19	11.78	0.413	-0.777	5.135	0.1	0.213	5.99949	0.864491	0.00149441	0.0017698	0.00503401	0.075	2.02931
1668.29	11.78	0.415	-0.776	5.195	0.1	0.213	5.99949	0.804491	0.00151369	0.00177617	0.00506603	0.075	2.02931
1669.27	11.78	0.415	-0.775	5.235	0.1	0.213	5.99949	0.764491	0.00151369	0.00178254	0.00507876	0.075	2.02931
1670.25	11.8	0.415	-0.775	5.295	0.1	0.213	6.00968	0.714677	0.00151369	0.00178254	0.00507876	0.075	2.02931
1671.24	11.78	0.415	-0.774	5.33	0.1	0.213	5.99949	0.669491	0.00151369	0.0017889	0.00509149	0.075	2.02931
1672.22	11.78	0.415	-0.773	5.395	0.1	0.213	5.99949	0.604491	0.00151369	0.00179527	0.00510423	0.07	1.89402
1673.21	11.78	0.415	-0.772	5.435	0.1	0.213	5.99949	0.564491	0.00151369	0.00180163	0.00511696	0.07	1.89402
1674.19	11.78	0.415	-0.771	5.485	0.1	0.213	5.99949	0.514491	0.00151369	0.001808	0.00512969	0.07	1.89402
1675.29	11.78	0.415	-0.77	5.54	0.1	0.213	5.99949	0.459491	0.00151369	0.00181437	0.00514242	0.07	1.89402
1676.27	11.8	0.415	-0.769	5.59	0.1	0.213	6.00968	0.419677	0.00151369	0.00182073	0.00515516	0.07	1.89402
1677.26	11.78	0.417	-0.768	5.64	0.1	0.213	5.99949	0.359491	0.00153297	0.0018271	0.00518717	0.07	1.89402
1678.24	11.78	0.415	-0.767	5.685	0.1	0.213	5.99949	0.314491	0.00151369	0.00183346	0.00518062	0.07	1.89402
1679.22	11.76	0.415	-0.766	5.735	0.1	0.213	5.9893	0.254305	0.00151369	0.00183983	0.00519335	0.07	1.89402
1680.21	11.78	0.417	-0.765	5.785	0.1	0.213	5.99949	0.214491	0.00153297	0.0018462	0.00522537	0.065	1.75874
1681.2	11.76	0.417	-0.764	5.835	0.1	0.213	5.9893	0.154305	0.00153297	0.00185256	0.0052381	0.065	1.75874
1682.29	11.78	0.417	-0.763	5.895	0.1	0.213	5.99949	0.104491	0.00153297	0.00185893	0.00525083	0.065	1.75874
1683.27	11.78	0.417	-0.762	5.94	0.1	0.213	5.99949	0.0594907	0.00153297	0.0018653	0.00526357	0.065	1.75874
1684.25	11.78	0.417	-0.762	5.985	0.1	0.213	5.99949	0.0144907	0.00153297	0.0018653	0.00526357	0.065	1.75874
1685.24	11.78	0.417	-0.761	6.035	0.1	0.213	5.99949	-0.0355093	0.00153297	0.00187166	0.0052763	0.065	1.75874
1686.22	11.78	0.417	-0.76	6.09	0.1	0.213	5.99949	-0.0905093	0.00153297	0.00187803	0.00528903	0.065	1.75874
1687.21	11.78	0.417	-0.759	6.145	0.1	0.213	5.99949	-0.145509	0.00153297	0.00188439	0.00530176	0.065	1.75874
1688.19	11.78	0.417	-0.758	6.19	0.1	0.213	5.99949	-0.190509	0.00153297	0.00189076	0.00531449	0.065	1.75874
1689.29	11.78	0.418	-0.757	6.245	0.1	0.213	5.99949	-0.245509	0.00154261	0.00189713	0.00533687	0.065	1.75874
1690.27	11.78	0.418	-0.756	6.29	0.1	0.213	5.99949	-0.290509	0.00154261	0.00190349	0.0053496	0.065	1.75874
1691.26	11.78	0.418	-0.755	6.34	0.1	0.213	5.99949	-0.340509	0.00154261	0.00190986	0.00536233	0.065	1.75874
1692.24	11.78	0.418	-0.754	6.385	0.1	0.213	5.99949	-0.385509	0.00154261	0.00191623	0.00537507	0.06	1.62345
1693.22	11.78	0.418	-0.753	6.44	0.1	0.213	5.99949	-0.440509	0.00154261	0.00192259	0.0053878	0.06	1.62345
1694.21	11.78	0.418	-0.752	6.485	0.1	0.213	5.99949	-0.485509	0.00154261	0.00192896	0.00540053	0.06	1.62345
1695.2	11.76	0.418	-0.752	6.53	0.1	0.213	5.9893	-0.540695	0.00154261	0.00192896	0.00540053	0.06	1.62345
1696.29	11.76	0.418	-0.751	6.585	0.1	0.213	5.9893	-0.595695	0.00154261	0.00193532	0.00541326	0.06	1.62345
1697.27	11.76	0.418	-0.75	6.635	0.1	0.213	5.9893	-0.645695	0.00154261	0.00194169	0.005426	0.06	1.62345
1698.25	11.76	0.418	-0.749	6.69	0.1	0.213	5.9893	-0.700695	0.00154261	0.00194806	0.00543873	0.06	1.62345
1699.24	11.74	0.418	-0.748	6.73	0.1	0.213	5.97912	-0.750881	0.00154261	0.00195442	0.00545146	0.06	1.62345
1700.22	11.76	0.42	-0.747	6.785	0.1	0.213	5.9893	-0.795695	0.0015619	0.00196079	0.00548348	0.06	1.62345
1701.21	11.76	0.418	-0.746	6.835	0.1	0.213	5.9893	-0.845695	0.00154261	0.00196716	0.00547692	0.06	1.62345
1702.2	11.78	0.42	-0.745	6.89	0.1	0.213	5.99949	-0.890509	0.0015619	0.00197352	0.00550894	0.06	1.62345
1703.29	11.76	0.42	-0.744	6.945	0.1	0.213	5.9893	-0.955695	0.0015619	0.00197989	0.00552167	0.06	1.62345
1704.27	11.78	0.42	-0.743	6.99	0.1	0.213	5.99949	-0.990509	0.0015619	0.00198625	0.0055344	0.06	1.62345
1705.25	11.76	0.42	-0.742	7.045	0.1	0.213	5.9893	-1.0557	0.0015619	0.00199262	0.00554714	0.06	1.62345
1706.24	11.78	0.42	-0.742	7.085	0.1	0.213	5.99949	-1.08551	0.0015619	0.00199262	0.00554714	0.06	1.62345
1707.22	11.76	0.42	-0.74	7.14	0.1	0.213	5.9893	-1.1507	0.0015619	0.00200535	0.0055726	0.06	1.62345
1708.21	11.78	0.42	-0.74	7.185	0.1	0.213	5.99949	-1.18551	0.0015619	0.00200535	0.0055726	0.06	1.62345
1709.19	11.78	0.422	-0.739	7.235	0.1	0.213	5.99949	-1.23551	0.00158118	0.00201172	0.00560462	0.06	1.62345
1710.29	11.78	0.422	-0.738	7.295	0.1	0.213	5.99949	-1.29551	0.00158118	0.00201808	0.00561735	0.06	1.62345
1711.27	11.78	0.422	-0.737	7.335	0.1	0.213	5.99949	-1.33551	0.00158118	0.00202445	0.00563008	0.06	1.62345
1712.26	11.78	0.422	-0.736	7.39	0.1	0.213	5.99949	-1.39051	0.00158118	0.00203082	0.00564281	0.06	1.62345
1713.24	11.76	0.422	-0.735	7.435	0.1	0.213	5.9893	-1.4457	0.00158118	0.00203718	0.00565555	0.06	1.62345
1714.22	11.78	0.422	-0.734	7.485	0.1	0.213	5.99949	-1.48551	0.00158118	0.00204355	0.00566828	0.06	1.62345
1715.21	11.78	0.422	-0.733	7.54	0.1	0.213	5.99949	-1.54051	0.00158118	0.00204992	0.00568101	0.06	1.62345
1716.19	11.78	0.422	-0.732	7.585	0.1	0.213	5.99949	-1.58551	0.00158118	0.00205628	0.00569374	0.06	1.62345
1717.29	11.78	0.422	-0.731	7.65	0.1	0.213	5.99949	-1.65051	0.00158118	0.00206265	0.00570648	0.055	1.48816
1718.27	11.78	0.423	-0.73	7.69	0.1	0.213	5.99949	-1.69051	0.00159082	0.00206901	0.00572885	0.055	1.48816
1719.25	11.78	0.423	-0.729	7.74	0.1	0.213	5.99949	-1.74051	0.00159082	0.00207538	0.00574158	0.055	1.48816
1720.24	11.78	0.423	-0.729	7.785	0.1	0.213	5.99949	-1.78551	0.00159082	0.00207538	0.00574158	0.055	1.48816
1721.22	11.78	0.423	-0.728	7.845	0.1	0.213	5.99949	-1.84551	0.00159082	0.00208175	0.00575431	0.055	1.48816
1722.21	11.78	0.423	-0.727	7.885	0.1	0.213	5.99949	-1.88551	0.00159082	0.00208811	0.00576705	0.055	1.48816
1723.19	11.78	0.423	-0.726	7.93	0.1	0.213	5.99949	-1.93051	0.00159082	0.00209448	0.00577978	0.055	1.48816
1724.29	11.78	0.423	-0.725	7.99	0.1	0.213	5.99949	-1.99051	0.00159082	0.00210085	0.00579251	0.055	1.48816
1725.27	11.78	0.423	-0.724	8.045	0.1	0.213	5.99949	-2.04551	0.00159082	0.00210721	0.00580524	0.055	1.48816
1726.26	11.78	0.423	-0.723	8.095	0.1	0.213	5.99949	-2.09551	0.00159082	0.00211358	0.00581798	0.055	1.48816
1727.24	11.78	0.423	-0.722	8.14	0.1	0.213	5.99949	-2.14051	0.00159082	0.00211994	0.00583071	0.055	1.48816
1728.22	11.8	0.423	-0.721	8.19	0.1	0.213	6.00968	-2.18032	0.00159082	0.00212631	0.00584344	0.055	1.48816
1729.21	11.78	0.423	-0.72	8.24	0.1	0.213	5.99949	-2.24051	0.00159082	0.00213268	0.00585617	0.055	1.48816
1730.19	11.78	0.423	-0.719	8.285	0.1	0.213	5.99949	-2.28551	0.00159082	0.00213904	0.00586891	0.055	1.48816
1731.29	11.78	0.425	-0.718	8.34	0.1	0.213	5.99949	-2.34051	0.0016101	0.00214541	0.00590092	0.055	1.48816
1732.27	11.8	0.425	-0.717	8.39	0.1	0.213	6.00968	-2.38032	0.0016101	0.00215177	0.00591365	0.055	1.48816
1733.26	11.78	0.425	-0.716	8.445	0.1	0.213	5.99949	-2.44551	0.0016101	0.00215814	0.00592639	0.055	1.48816
1734.24	11.8	0.425	-0.715	8.365	0.1	0.213	6.00968	-2.35532	0.0016101	0.00216451	0.00593912	0.055	1.48816
1735.22	11.82	0.425	-0.715	8.295	0.1	0.213	6.01986	-2.27514	0.0016101	0.00216451	0.00593912	0.055	1.48816
1736.21	11.82	0.425	-0.715	8.285	0.1	0.213	6.01986	-2.26514	0.0016101	0.00216451	0.00593912	0.055	1.48816
1737.19	11.78	0.423	-0.715	8.335	0.1	0.213	5.99949	-2.33551	0.00159082	0.00216451	0.00591984	0.055	1.48816
1738.29	11.78	0.425	-0.715	8.375	0.1	0.213	5.99949	-2.37551	0.0016101	0.00216451	0.00593912	0.055	1.48816
1739.27	11.78	0.425	-0.714	8.4	0.1	0.213	5.99949	-2.40051	0.0016101	0.00217087	0.00595185	0.055	1.48816
1740.25	11.78	0.425	-0.714	8.415	0.1	0.213	5.99949	-2.41551	0.0016101	0.00217087	0.00595185	0.055	1.48816
1741.24	11.76	0.425	-0.714	8.43	0.1	0.213	5.9893	-2.4407	0.0016101	0.00217087	0.00595185	0.055	1.48816
1742.22	11.76	0.425	-0.713	8.44	0.1	0.213	5.9893	-2.4507	0.0016101	0.00217724	0.00596458	0.055	1.48816
1743.21	11.76	0.425	-0.713	8.45	0.1	0.213	5.9893	-2.4607	0.0016101	0.00217724	0.00596458	0.055	1.48816
1744.19	11.76	0.425	-0.713	8.46	0.1	0.213	5.9893	-2.4707	0.0016101	0.00217724	0.00596458	0.055	1.48816
1745.29	11.76	0.425	-0.713	8.475	0.1	0.213	5.9893	-2.4857	0.0016101	0.00217724	0.00596458	0.055	1.48816
1746.27	11.76	0.425	-0.713	8.48	0.1	0.213	5.9893	-2.4907	0.0016101	0.00217724	0.00596458	0.055	1.48816
1747.26	11.78	0.425	-0.712	8.495	0.1	0.213	5.99949	-2.49551	0.0016101	0.00218361	0.00597732	0.055	1.48816
1748.24	11.78	0.425	-0.712	8.505	0.1	0.213	5.99949	-2.50551	0.0016101	0.00218361	0.00597732	0.055	1.48816
1749.23	11.78	0.425	-0.712	8.51	0.1	0.213	5.99949	-2.51051	0.0016101	0.00218361	0.00597732	0.055	1.48816
1750.21	11.78	0.427	-0.712	8.515	0.1	0.213	5.99949	-2.51551	0.00162939	0.00218361	0.0059966	0.055	1.48816
1751.2	11.78	0.425	-0.712	8.525	0.1	0.213	5.99949	-2.52551	0.0016101	0.00218361	0.00597732	0.055	1.48816
1752.29	11.78	0.425	-0.711	8.53	0.1	0.213	5.99949	-2.53051	0.0016101	0.00218997	0.00599005	0.055	1.48816
1753.27	11.78	0.427	-0.711	8.535	0.1	0.213	5.99949	-2.53551	0.00162939	0.00218997	0.00600933	0.05	1.35287
1754.26	11.78	0.425	-0.711	8.545	0.1	0.213	5.99949	-2.54551	0.0016101	0.00218997	0.00599005	0.05	1.35287
1755.24	11.78	0.425	-0.711	8.55	0.1	0.213	5.99949	-2.55051	0.0016101	0.00218997	0.00599005	0.055	1.48816
1756.22	11.78	0.425	-0.711	8.555	0.1	0.213	5.99949	-2.55551	0.0016101	0.00218997	0.00599005	0.055	1.48816
1757.21	11.78	0.425	-0.71	8.555	0.1	0.213	5.99949	-2.55551	0.0016101	0.00219634	0.00600278	0.05	1.35287
1758.19	11.78	0.427	-0.71	8.565	0.1	0.213	5.99949	-2.56551	0.00162939	0.00219634	0.00602206	0.055	1.48816
1759.29	11.78	0.427	-0.71	8.565	0.1	0.213	5.99949	-2.56551	0.00162939	0.00219634	0.00602206	0.05	1.35287
1760.27	11.78	0.425	-0.71	8.575	0.1	0.213	5.99949	-2.57551	0.0016101	0.00219634	0.00600278	0.055	1.48816
1761.25	11.78	0.425	-0.71	8.58	0.1	0.213	5.99949	-2.58051	0.0016101	0.00219634	0.00600278	0.05	1.35287
1762.24	11.78	0.425	-0.71	8.58	0.1	0.213	5.99949	-2.58051	0.0016101	0.00219634	0.00600278	0.055	1.48816
1763.22	11.78	0.427	-0.71	8.585	0.1	0.213	5.99949	-2.58551	0.00162939	0.00219634	0.00602206	0.055	1.48816
1764.21	11.78	0.427	-0.709	8.59	0.1	0.213	5.99949	-2.59051	0.00162939	0.0022027	0.0060348	0.05	1.35287
1765.2	11.78	0.427	-0.709	8.59	0.1	0.213	5.99949	-2.59051	0.00162939	0.0022027	0.0060348	0.05	1.35287
1766.29	11.78	0.425	-0.709	8.595	0.1	0.213	5.99949	-2.59551	0.0016101	0.0022027	0.00601551	0.05	1.35287
1767.27	11.78	0.427	-0.709	8.595	0.1	0.213	5.99949	-2.59551	0.00162939	0.0022027	0.0060348	0.05	1.35287
1768.25	11.78	0.427	-0.709	8.6	0.1	0.213	5.99949	-2.60051	0.00162939	0.0022027	0.0060348	0.05	1.35287
1769.24	11.78	0.427	-0.709	8.6	0.1	0.213	5.99949	-2.60051	0.00162939	0.0022027	0.0060348	0.05	1.35287
1770.22	11.78	0.425	-0.709	8.6	0.1	0.213	5.99949	-2.60051	0.0016101	0.0022027	0.00601551	0.05	1.35287
1771.21	11.78	0.425	-0.709	8.6	0.1	0.213	5.99949	-2.60051	0.0016101	0.0022027	0.00601551	0.05	1.35287
1772.19	11.78	0.427	-0.709	8.6	0.1	0.213	5.99949	-2.60051	0.00162939	0.0022027	0.0060348	0.05	1.35287
1773.29	11.78	0.427	-0.709	8.6	0.1	0.213	5.99949	-2.60051	0.00162939	0.0022027	0.0060348	0.05	1.35287
1774.27	11.78	0.427	-0.709	8.6	0.1	0.213	5.99949	-2.60051	0.00162939	0.0022027	0.0060348	0.05	1.35287
1775.25	11.78	0.427	-0.708	8.6	0.1	0.213	5.99949	-2.60051	0.00162939	0.00220907	0.00604753	0.05	1.35287
1776.24	11.78	0.427	-0.708	8.6	0.1	0.213	5.99949	-2.60051	0.00162939	0.00220907	0.00604753	0.05	1.35287
1777.22	11.78	0.427	-0.708	8.6	0.1	0.213	5.99949	-2.60051	0.00162939	0.00220907	0.00604753	0.05	1.35287
1778.21	11.78	0.427	-0.708	8.6	0.1	0.213	5.99949	-2.60051	0.00162939	0.00220907	0.00604753	0.05	1.35287
1779.19	11.78	0.427	-0.708	8.6	0.1	0.213	5.99949	-2.60051	0.00162939	0.00220907	0.00604753	0.05	1.35287
1780.29	11.78	0.427	-0.708	8.6	0.1	0.213	5.99949	-2.60051	0.00162939	0.00220907	0.00604753	0.05	1.35287
1781.27	11.78	0.427	-0.708	8.6	0.1	0.213	5.99949	-2.60051	0.00162939	0.00220907	0.00604753	0.05	1.35287
1782.25	11.78	0.425	-0.708	8.6	0.1	0.213	5.99949	-2.60051	0.0016101	0.00220907	0.00602825	0.05	1.35287
1783.24	11.78	0.427	-0.708	8.6	0.1	0.213	5.99949	-2.60051	0.00162939	0.00220907	0.00604753	0.05	1.35287
1784.22	11.78	0.427	-0.708	8.6	0.1	0.213	5.99949	-2.60051	0.00162939	0.00220907	0.00604753	0.05	1.35287
1785.21	11.78	0.427	-0.708	8.6	0.1	0.213	5.99949	-2.60051	0.00162939	0.00220907	0.00604753	0.05	1.35287
1786.2	11.78	0.425	-0.708	8.6	0.1	0.213	5.99949	-2.60051	0.0016101	0.00220907	0.00602825	0.05	1.35287
1787.29	11.78	0.427	-0.708	8.6	0.1	0.213	5.99949	-2.60051	0.00162939	0.00220907	0.00604753	0.05	1.35287
1788.27	11.78	0.427	-0.708	8.6	0.1	0.213	5.99949	-2.60051	0.00162939	0.00220907	0.00604753	0.05	1.35287
1789.26	11.78	0.425	-0.708	8.6	0.1	0.213	5.99949	-2.60051	0.0016101	0.00220907	0.00602825	0.05	1.35287
1790.24	11.78	0.427	-0.708	8.6	0.1	0.213	5.99949	-2.60051	0.00162939	0.00220907	0.00604753	0.05	1.35287
1791.22	11.78	0.427	-0.708	8.605	0.1	0.213	5.99949	-2.60551	0.00162939	0.00220907	0.00604753	0.05	1.35287
1792.21	11.78	0.427	-0.708	8.6	0.1	0.213	5.99949	-2.60051	0.00162939	0.00220907	0.00604753	0.05	1.35287
1793.19	11.78	0.427	-0.708	8.6	0.1	0.213	5.99949	-2.60051	0.00162939	0.00220907	0.00604753	0.05	1.35287
1794.29	11.78	0.427	-0.708	8.6	0.1	0.213	5.99949	-2.60051	0.00162939	0.00220907	0.00604753	0.05	1.35287
1795.27	11.78	0.427	-0.708	8.6	0.1	0.213	5.99949	-2.60051	0.00162939	0.00220907	0.00604753	0.05	1.35287
1796.26	11.78	0.425	-0.708	8.6	0.1	0.213	5.99949	-2.60051	0.0016101	0.00220907	0.00602825	0.05	1.35287
1797.24	11.78	0.427	-0.707	8.6	0.1	0.213	5.99949	-2.60051	0.00162939	0.00221544	0.00606026	0.05	1.35287
1798.22	11.78	0.427	-0.707	8.595	0.1	0.213	5.99949	-2.59551	0.00162939	0.00221544	0.00606026	0.05	1.35287
1799.21	11.78	0.427	-0.707	8.6	0.1	0.213	5.99949	-2.60051	0.00162939	0.00221544	0.00606026	0.05	1.35287
1800.19	11.8	0.427	-0.707	8.605	0.1	0.213	6.00968	-2.59532	0.00162939	0.00221544	0.00606026	0.05	1.35287
1801.29	11.8	0.427	-0.707	8.6	0.1	0.213	6.00968	-2.59032	0.00162939	0.00221544	0.00606026	0.05	1.35287
1802.27	11.8	0.427	-0.707	8.6	0.1	0.213	6.00968	-2.59032	0.00162939	0.00221544	0.00606026	0.05	1.35287
1803.26	11.8	0.427	-0.707	8.6	0.1	0.213	6.00968	-2.59032	0.00162939	0.00221544	0.00606026	0.05	1.35287
1804.24	11.8	0.427	-0.707	8.6	0.1	0.213	6.00968	-2.59032	0.00162939	0.00221544	0.00606026	0.05	1.35287
1805.22	11.78	0.427	-0.707	8.6	0.1	0.213	5.99949	-2.60051	0.00162939	0.00221544	0.00606026	0.05	1.35287
1806.21	11.8	0.427	-0.707	8.6	0.1	0.213	6.00968	-2.59032	0.00162939	0.00221544	0.00606026	0.05	1.35287
1807.19	11.78	0.427	-0.707	8.6	0.1	0.213	5.99949	-2.60051	0.00162939	0.00221544	0.00606026	0.05	1.35287
1808.29	11.78	0.427	-0.707	8.6	0.1	0.213	5.99949	-2.60051	0.00162939	0.00221544	0.00606026	0.05	1.35287
1809.27	11.78	0.427	-0.707	8.6	0.1	0.213	5.99949	-2.60051	0.00162939	0.00221544	0.00606026	0.05	1.35287
1810.25	11.78	0.427	-0.707	8.6	0.1	0.213	5.99949	-2.60051	0.00162939	0.00221544	0.00606026	0.05	1.35287
1811.24	11.78	0.427	-0.707	8.605	0.1	0.213	5.99949	-2.60551	0.00162939	0.00221544	0.00606026	0.05	1.35287
1812.22	11.78	0.427	-0.707	8.6	0.1	0.213	5.99949	-2.60051	0.00162939	0.00221544	0.00606026	0.05	1.35287
1813.21	11.78	0.427	-0.707	8.6	0.1	0.213	5.99949	-2.60051	0.00162939	0.00221544	0.00606026	0.05	1.35287
1814.19	11.78	0.427	-0.707	8.6	0.1	0.213	5.99949	-2.60051	0.00162939	0.00221544	0.00606026	0.05	1.35287
1815.29	11.78	0.427	-0.707	8.6	0.1	0.213	5.99949	-2.60051	0.00162939	0.00221544	0.00606026	0.05	1.35287
1816.27	11.78	0.427	-0.707	8.6	0.1	0.213	5.99949	-2.60051	0.00162939	0.00221544	0.00606026	0.05	1.35287
1817.26	11.78	0.427	-0.707	8.6	0.1	0.213	5.99949	-2.60051	0.00162939	0.00221544	0.00606026	0.05	1.35287
1818.24	11.78	0.427	-0.707	8.595	0.1	0.213	5.99949	-2.59551	0.00162939	0.00221544	0.00606026	0.05	1.35287
1819.22	11.78	0.427	-0.707	8.6	0.1	0.213	5.99949	-2.60051	0.00162939	0.00221544	0.00606026	0.05	1.35287
1820.21	11.78	0.427	-0.707	8.6	0.1	0.213	5.99949	-2.60051	0.00162939	0.00221544	0.00606026	0.05	1.35287
1821.19	11.78	0.427	-0.707	8.6	0.1	0.213	5.99949	-2.60051	0.00162939	0.00221544	0.00606026	0.05	1.35287
1822.29	11.78	0.427	-0.707	8.595	0.1	0.213	5.99949	-2.59551	0.00162939	0.00221544	0.00606026	0.05	1.35287
1823.27	11.76	0.427	-0.707	8.6	0.1	0.213	5.9893	-2.6107	0.00162939	0.00221544	0.00606026	0.05	1.35287
1824.26	11.76	0.427	-0.707	8.6	0.1	0.213	5.9893	-2.6107	0.00162939	0.00221544	0.00606026	0.05	1.35287
1825.24	11.76	0.427	-0.707	8.6	0.1	0.213	5.9893	-2.6107	0.00162939	0.00221544	0.00606026	0.05	1.35287
1826.22	11.76	0.427	-0.707	8.6	0.1	0.213	5.9893	-2.6107	0.00162939	0.00221544	0.00606026	0.05	1.35287
1827.21	11.76	0.427	-0.707	8.6	0.1	0.213	5.9893	-2.6107	0.00162939	0.00221544	0.00606026	0.05	1.35287
1828.19	11.76	0.427	-0.707	8.6	0.1	0.213	5.9893	-2.6107	0.00162939	0.00221544	0.00606026	0.05	1.35287
1829.29	11.78	0.427	-0.707	8.6	0.1	0.213	5.99949	-2.60051	0.00162939	0.00221544	0.00606026	0.05	1.35287
1830.27	11.78	0.427	-0.707	8.6	0.1	0.213	5.99949	-2.60051	0.00162939	0.00221544	0.00606026	0.05	1.35287
1831.26	11.78	0.427	-0.707	8.605	0.1	0.213	5.99949	-2.60551	0.00162939	0.00221544	0.00606026	0.05	1.35287
1832.24	11.78	0.427	-0.707	8.6	0.1	0.213	5.99949	-2.60051	0.00162939	0.00221544	0.00606026	0.05	1.35287
1833.22	11.78	0.427	-0.707	8.6	0.1	0.213	5.99949	-2.60051	0.00162939	0.00221544	0.00606026	0.05	1.35287
1834.21	11.78	0.427	-0.707	8.6	0.1	0.213	5.99949	-2.60051	0.00162939	0.00221544	0.00606026	0.05	1.35287
1835.19	11.78	0.427	-0.707	8.605	0.1	0.213	5.99949	-2.60551	0.00162939	0.00221544	0.00606026	0.05	1.35287
1836.29	11.78	0.427	-0.707	8.6	0.1	0.213	5.99949	-2.60051	0.00162939	0.00221544	0.00606026	0.05	1.35287
1837.27	11.78	0.427	-0.707	8.6	0.1	0.213	5.99949	-2.60051	0.00162939	0.00221544	0.00606026	0.05	1.35287
1838.26	11.78	0.427	-0.707	8.595	0.1	0.213	5.99949	-2.59551	0.00162939	0.00221544	0.00606026	0.05	1.35287
1839.24	11.78	0.427	-0.707	8.6	0.1	0.213	5.99949	-2.60051	0.00162939	0.00221544	0.00606026	0.05	1.35287
1840.22	11.78	0.427	-0.707	8.6	0.1	0.213	5.99949	-2.60051	0.00162939	0.00221544	0.00606026	0.05	1.35287
1841.21	11.78	0.427	-0.707	8.605	0.1	0.213	5.99949	-2.60551	0.00162939	0.00221544	0.00606026	0.05	1.35287
1842.19	11.78	0.427	-0.707	8.6	0.1	0.213	5.99949	-2.60051	0.00162939	0.00221544	0.00606026	0.05	1.35287
1843.29	11.78	0.427	-0.707	8.6	0.1	0.213	5.99949	-2.60051	0.00162939	0.00221544	0.00606026	0.05	1.35287
1844.27	11.78	0.427	-0.707	8.6	0.1	0.213	5.99949	-2.60051	0.00162939	0.00221544	0.00606026	0.05	1.35287
1845.26	11.78	0.427	-0.707	8.6	0.1	0.213	5.99949	-2.60051	0.00162939	0.00221544	0.00606026	0.05	1.35287
1846.24	11.78	0.427	-0.707	8.6	0.1	0.213	5.99949	-2.60051	0.00162939	0.00221544	0.00606026	0.05	1.35287
1847.22	11.78	0.427	-0.707	8.6	0.1	0.213	5.99949	-2.60051	0.00162939	0.00221544	0.00606026	0.05	1.35287
1848.21	11.78	0.427	-0.707	8.595	0.1	0.213	5.99949	-2.59551	0.00162939	0.00221544	0.00606026	0.05	1.35287
1849.19	11.78	0.427	-0.707	8.595	0.1	0.213	5.99949	-2.59551	0.00162939	0.00221544	0.00606026	0.05	1.35287
1850.29	11.78	0.427	-0.707	8.6	0.1	0.213	5.99949	-2.60051	0.00162939	0.00221544	0.00606026	0.05	1.35287
1851.27	11.78	0.428	-0.707	8.6	0.1	0.213	5.99949	-2.60051	0.00163903	0.00221544	0.0060699	0.05	1.35287
1852.26	11.78	0.427	-0.707	8.6	0.1	0.213	5.99949	-2.60051	0.00162939	0.00221544	0.00606026	0.05	1.35287
1853.24	11.78	0.427	-0.707	8.6	0.1	0.213	5.99949	-2.60051	0.00162939	0.00221544	0.00606026	0.05	1.35287
1854.23	11.78	0.427	-0.707	8.595	0.1	0.213	5.99949	-2.59551	0.00162939	0.00221544	0.00606026	0.05	1.35287
1855.21	11.78	0.428	-0.707	8.595	0.1	0.213	5.99949	-2.59551	0.00163903	0.00221544	0.0060699	0.05	1.35287
1856.2	11.78	0.427	-0.707	8.6	0.1	0.213	5.99949	-2.60051	0.00162939	0.00221544	0.00606026	0.05	1.35287
1857.29	11.78	0.427	-0.706	8.6	0.1	0.213	5.99949	-2.60051	0.00162939	0.0022218	0.00607299	0.05	1.35287
1858.27	11.78	0.427	-0.707	8.595	0.1	0.213	5.99949	-2.59551	0.00162939	0.00221544	0.00606026	0.05	1.35287
1859.26	11.78	0.427	-0.707	8.6	0.1	0.213	5.99949	-2.60051	0.00162939	0.00221544	0.00606026	0.05	1.35287
1860.24	11.78	0.427	-0.707	8.6	0.1	0.213	5.99949	-2.60051	0.00162939	0.00221544	0.00606026	0.05	1.35287
1861.22	11.78	0.428	-0.706	8.605	0.1	0.213	5.99949	-2.60551	0.00163903	0.0022218	0.00608263	0.05	1.35287
1862.21	11.78	0.428	-0.706	8.6	0.1	0.213	5.99949	-2.60051	0.00163903	0.0022218	0.00608263	0.05	1.35287
1863.19	11.78	0.427	-0.706	8.6	0.1	0.213	5.99949	-2.60051	0.00162939	0.0022218	0.00607299	0.05	1.35287
1864.29	11.78	0.427	-0.706	8.595	0.1	0.213	5.99949	-2.59551	0.00162939	0.0022218	0.00607299	0.05	1.35287
1865.27	11.78	0.428	-0.706	8.6	0.1	0.213	5.99949	-2.60051	0.00163903	0.0022218	0.00608263	0.05	1.35287
1866.26	11.78	0.427	-0.706	8.6	0.1	0.213	5.99949	-2.60051	0.00162939	0.0022218	0.00607299	0.05	1.35287
1867.24	11.78	0.427	-0.706	8.6	0.1	0.213	5.99949	-2.60051	0.00162939	0.0022218	0.00607299	0.05	1.35287
1868.22	11.78	0.427	-0.706	8.6	0.1	0.213	5.99949	-2.60051	0.00162939	0.0022218	0.00607299	0.05	1.35287
1869.21	11.78	0.427	-0.706	8.6	0.1	0.213	5.99949	-2.60051	0.00162939	0.0022218	0.00607299	0.05	1.35287
1870.19	11.78	0.428	-0.706	8.595	0.1	0.213	5.99949	-2.59551	0.00163903	0.0022218	0.00608263	0.05	1.35287
1871.29	11.78	0.427	-0.706	8.605	0.1	0.213	5.99949	-2.60551	0.00162939	0.0022218	0.00607299	0.05	1.35287
1872.27	11.78	0.427	-0.706	8.6	0.1	0.213	5.99949	-2.60051	0.00162939	0.0022218	0.00607299	0.05	1.35287
1873.25	11.78	0.427	-0.706	8.6	0.1	0.213	5.99949	-2.60051	0.00162939	0.0022218	0.00607299	0.05	1.35287
1874.24	11.78	0.428	-0.706	8.6	0.1	0.213	5.99949	-2.60051	0.00163903	0.0022218	0.00608263	0.05	1.35287
1875.22	11.78	0.428	-0.706	8.6	0.1	0.213	5.99949	-2.60051	0.00163903	0.0022218	0.00608263	0.05	1.35287
1876.21	11.78	0.427	-0.706	8.6	0.1	0.213	5.99949	-2.60051	0.00162939	0.0022218	0.00607299	0.05	1.35287
1877.19	11.78	0.427	-0.706	8.605	0.1	0.213	5.99949	-2.60551	0.00162939	0.0022218	0.00607299	0.05	1.35287
1878.29	11.78	0.427	-0.706	8.595	0.1	0.213	5.99949	-2.59551	0.00162939	0.0022218	0.00607299	0.05	1.35287
1879.27	11.78	0.428	-0.706	8.6	0.1	0.213	5.99949	-2.60051	0.00163903	0.0022218	0.00608263	0.05	1.35287
1880.25	11.78	0.427	-0.706	8.6	0.1	0.213	5.99949	-2.60051	0.00162939	0.0022218	0.00607299	0.05	1.35287
1881.24	11.78	0.428	-0.706	8.6	0.1	0.213	5.99949	-2.60051	0.00163903	0.0022218	0.00608263	0.05	1.35287
1882.22	11.78	0.428	-0.706	8.6	0.1	0.213	5.99949	-2.60051	0.00163903	0.0022218	0.00608263	0.05	1.35287
1883.21	11.78	0.427	-0.706	8.6	0.1	0.213	5.99949	-2.60051	0.00162939	0.0022218	0.00607299	0.05	1.35287
1884.2	11.78	0.428	-0.706	8.575	0.1	0.213	5.99949	-2.57551	0.00163903	0.0022218	0.00608263	0.05	1.35287
1885.29	11.78	0.428	-0.706	8.545	0.1	0.213	5.99949	-2.54551	0.00163903	0.0022218	0.00608263	0.05	1.35287
1886.27	11.8	0.427	-0.706	8.485	0.1	0.213	6.00968	-2.47532	0.00162939	0.0022218	0.00607299	0.05	1.35287
1887.26	11.8	0.427	-0.707	8.43	0.1	0.213	6.00968	-2.42032	0.00162939	0.00221544	0.00606026	0.05	1.35287
1888.24	11.8	0.427	-0.707	8.37	0.1	0.213	6.00968	-2.36032	0.00162939	0.00221544	0.00606026	0.05	1.35287
1889.22	11.8	0.428	-0.707	8.32	0.1	0.213	6.00968	-2.31032	0.00163903	0.00221544	0.0060699	0.05	1.35287
1890.21	11.78	0.427	-0.707	8.27	0.1	0.213	5.99949	-2.27051	0.00162939	0.00221544	0.00606026	0.05	1.35287
1891.19	11.78	0.427	-0.708	8.22	0.1	0.213	5.99949	-2.22051	0.00162939	0.00220907	0.00604753	0.05	1.35287
1892.29	11.8	0.427	-0.708	8.17	0.1	0.213	6.00968	-2.16032	0.00162939	0.00220907	0.00604753	0.05	1.35287
1893.27	11.8	0.427	-0.708	8.12	0.1	0.213	6.00968	-2.11032	0.00162939	0.00220907	0.00604753	0.05	1.35287
1894.26	11.78	0.427	-0.708	8.065	0.1	0.213	5.99949	-2.06551	0.00162939	0.00220907	0.00604753	0.05	1.35287
1895.24	11.78	0.427	-0.709	8.025	0.1	0.213	5.99949	-2.02551	0.00162939	0.0022027	0.0060348	0.05	1.35287
1896.22	11.76	0.425	-0.709	7.965	0.1	0.213	5.9893	-1.9757	0.0016101	0.0022027	0.00601551	0.05	1.35287
1897.21	11.76	0.425	-0.709	7.93	0.1	0.213	5.9893	-1.9407	0.0016101	0.0022027	0.00601551	0.05	1.35287
1898.19	11.76	0.425	-0.709	7.87	0.1	0.213	5.9893	-1.8807	0.0016101	0.0022027	0.00601551	0.05	1.35287
1899.29	11.78	0.425	-0.71	7.815	0.1	0.213	5.99949	-1.81551	0.0016101	0.00219634	0.00600278	0.05	1.35287
1900.27	11.78	0.425	-0.71	7.77	0.1	0.213	5.99949	-1.77051	0.0016101	0.00219634	0.00600278	0.05	1.35287
1901.26	11.78	0.425	-0.71	7.72	0.1	0.213	5.99949	-1.72051	0.0016101	0.00219634	0.00600278	0.05	1.35287
1902.24	11.8	0.425	-0.71	7.675	0.1	0.213	6.00968	-1.66532	0.0016101	0.00219634	0.00600278	0.05	1.35287
1903.22	11.8	0.425	-0.711	7.62	0.1	0.213	6.00968	-1.61032	0.0016101	0.00218997	0.00599005	0.05	1.35287
1904.21	11.78	0.423	-0.711	7.57	0.1	0.213	5.99949	-1.57051	0.00159082	0.00218997	0.00597077	0.05	1.35287
1905.2	11.76	0.425	-0.711	7.525	0.1	0.213	5.9893	-1.5357	0.0016101	0.00218997	0.00599005	0.05	1.35287
1906.29	11.76	0.423	-0.712	7.465	0.1	0.213	5.9893	-1.4757	0.00159082	0.00218361	0.00595803	0.05	1.35287
1907.27	11.78	0.423	-0.712	7.425	0.1	0.213	5.99949	-1.42551	0.00159082	0.00218361	0.00595803	0.05	1.35287
1908.26	11.78	0.423	-0.712	7.365	0.1	0.213	5.99949	-1.36551	0.00159082	0.00218361	0.00595803	0.05	1.35287
1909.24	11.76	0.423	-0.713	7.32	0.1	0.213	5.9893	-1.3307	0.00159082	0.00217724	0.0059453	0.05	1.35287
1910.22	11.76	0.423	-0.713	7.265	0.1	0.213	5.9893	-1.2757	0.00159082	0.00217724	0.0059453	0.05	1.35287
1911.21	11.78	0.423	-0.713	7.225	0.1	0.213	5.99949	-1.22551	0.00159082	0.00217724	0.0059453	0.05	1.35287
1912.19	11.8	0.423	-0.713	7.17	0.1	0.213	6.00968	-1.16032	0.00159082	0.00217724	0.0059453	0.05	1.35287
1913.29	11.78	0.423	-0.714	7.115	0.1	0.213	5.99949	-1.11551	0.00159082	0.00217087	0.00593257	0.05	1.35287
1914.27	11.78	0.423	-0.714	7.07	0.1	0.213	5.99949	-1.07051	0.00159082	0.00217087	0.00593257	0.05	1.35287
1915.26	11.78	0.422	-0.714	7.02	0.1	0.213	5.99949	-1.02051	0.00158118	0.00217087	0.00592293	0.055	1.48816
1916.24	11.76	0.422	-0.715	6.97	0.1	0.213	5.9893	-0.980695	0.00158118	0.00216451	0.00591019	0.05	1.35287
1917.22	11.78	0.422	-0.715	6.925	0.1	0.213	5.99949	-0.925509	0.00158118	0.00216451	0.00591019	0.055	1.48816
1918.21	11.8	0.422	-0.715	6.875	0.1	0.213	6.00968	-0.865323	0.00158118	0.00216451	0.00591019	0.055	1.48816
1919.19	11.78	0.422	-0.716	6.825	0.1	0.213	5.99949	-0.825509	0.00158118	0.00215814	0.00589746	0.05	1.35287
1920.29	11.78	0.422	-0.716	6.76	0.1	0.213	5.99949	-0.760509	0.00158118	0.00215814	0.00589746	0.055	1.48816
1921.27	11.78	0.422	-0.716	6.725	0.1	0.213	5.99949	-0.725509	0.00158118	0.00215814	0.00589746	0.055	1.48816
1922.25	11.78	0.42	-0.717	6.665	0.1	0.213	5.99949	-0.665509	0.0015619	0.00215177	0.00586545	0.055	1.48816
1923.24	11.8	0.42	-0.717	6.625	0.1	0.213	6.00968	-0.615323	0.0015619	0.00215177	0.00586545	0.055	1.48816
1924.22	11.78	0.42	-0.717	6.57	0.1	0.213	5.99949	-0.570509	0.0015619	0.00215177	0.00586545	0.055	1.48816
1925.21	11.78	0.42	-0.718	6.525	0.1	0.213	5.99949	-0.525509	0.0015619	0.00214541	0.00585271	0.055	1.48816
1926.2	11.76	0.42	-0.718	6.47	0.1	0.213	5.9893	-0.480695	0.0015619	0.00214541	0.00585271	0.055	1.48816
1927.29	11.78	0.42	-0.719	6.415	0.1	0.213	5.99949	-0.415509	0.0015619	0.00213904	0.00583998	0.055	1.48816
1928.27	11.78	0.42	-0.719	6.365	0.1	0.213	5.99949	-0.365509	0.0015619	0.00213904	0.00583998	0.055	1.48816
1929.26	11.78	0.42	-0.719	6.325	0.1	0.213	5.99949	-0.325509	0.0015619	0.00213904	0.00583998	0.055	1.48816
1930.24	11.76	0.42	-0.72	6.27	0.1	0.213	5.9893	-0.280695	0.0015619	0.00213268	0.00582725	0.055	1.48816
1931.22	11.78	0.418	-0.72	6.225	0.1	0.213	5.99949	-0.225509	0.00154261	0.00213268	0.00580797	0.055	1.48816
1932.21	11.78	0.42	-0.72	6.175	0.1	0.213	5.99949	-0.175509	0.0015619	0.00213268	0.00582725	0.055	1.48816
1933.19	11.8	0.42	-0.721	6.125	0.1	0.213	6.00968	-0.115323	0.0015619	0.00212631	0.00581452	0.055	1.48816
1934.29	11.78	0.418	-0.721	6.07	0.1	0.213	5.99949	-0.0705093	0.00154261	0.00212631	0.00579523	0.055	1.48816
1935.27	11.78	0.418	-0.722	6.025	0.1	0.213	5.99949	-0.0255093	0.00154261	0.00211994	0.0057825	0.055	1.48816
1936.25	11.78	0.418	-0.722	5.97	0.1	0.213	5.99949	0.0294907	0.00154261	0.00211994	0.0057825	0.055	1.48816
1937.24	11.78	0.418	-0.722	5.93	0.1	0.213	5.99949	0.0694907	0.00154261	0.00211994	0.0057825	0.055	1.48816
1938.22	11.8	0.418	-0.723	5.865	0.1	0.213	6.00968	0.144677	0.00154261	0.00211358	0.00576977	0.055	1.48816
1939.21	11.78	0.418	-0.723	5.825	0.1	0.213	5.99949	0.174491	0.00154261	0.00211358	0.00576977	0.055	1.48816
1940.19	11.78	0.418	-0.724	5.77	0.1	0.213	5.99949	0.229491	0.00154261	0.00210721	0.00575704	0.055	1.48816
1941.29	11.78	0.418	-0.724	5.72	0.1	0.213	5.99949	0.279491	0.00154261	0.00210721	0.00575704	0.055	1.48816
1942.27	11.78	0.418	-0.725	5.665	0.1	0.213	5.99949	0.334491	0.00154261	0.00210085	0.00574431	0.055	1.48816
1943.25	11.78	0.418	-0.725	5.62	0.1	0.213	5.99949	0.379491	0.00154261	0.00210085	0.00574431	0.055	1.48816
1944.24	11.78	0.417	-0.726	5.57	0.1	0.213	5.99949	0.429491	0.00153297	0.00209448	0.00572193	0.055	1.48816
1945.22	11.76	0.418	-0.726	5.515	0.1	0.213	5.9893	0.474305	0.00154261	0.00209448	0.00573157	0.055	1.48816
1946.21	11.76	0.417	-0.727	5.47	0.1	0.213	5.9893	0.519305	0.00153297	0.00208811	0.0057092	0.055	1.48816
1947.19	11.78	0.417	-0.727	5.425	0.1	0.213	5.99949	0.574491	0.00153297	0.00208811	0.0057092	0.055	1.48816
1948.29	11.76	0.417	-0.728	5.36	0.1	0.213	5.9893	0.629305	0.00153297	0.00208175	0.00569647	0.055	1.48816
1949.27	11.78	0.417	-0.728	5.32	0.1	0.213	5.99949	0.679491	0.00153297	0.00208175	0.00569647	0.055	1.48816
1950.25	11.76	0.417	-0.729	5.265	0.1	0.213	5.9893	0.724305	0.00153297	0.00207538	0.00568373	0.055	1.48816
1951.24	11.78	0.417	-0.729	5.225	0.1	0.213	5.99949	0.774491	0.00153297	0.00207538	0.00568373	0.055	1.48816
1952.22	11.78	0.417	-0.73	5.17	0.1	0.213	5.99949	0.829491	0.00153297	0.00206901	0.005671	0.055	1.48816
1953.21	11.78	0.417	-0.73	5.13	0.1	0.213	5.99949	0.869491	0.00153297	0.00206901	0.005671	0.055	1.48816
1954.19	11.76	0.417	-0.731	5.07	0.1	0.213	5.9893	0.919305	0.00153297	0.00206265	0.00565827	0.055	1.48816
1955.29	11.78	0.417	-0.732	5.02	0.1	0.213	5.99949	0.979491	0.00153297	0.00205628	0.00564554	0.055	1.48816
1956.27	11.78	0.417	-0.732	4.97	0.1	0.213	5.99949	1.02949	0.00153297	0.00205628	0.00564554	0.055	1.48816
1957.26	11.78	0.417	-0.733	4.92	0.1	0.213	5.99949	1.07949	0.00153297	0.00204992	0.0056328	0.055	1.48816
1958.24	11.78	0.417	-0.733	4.87	0.1	0.213	5.99949	1.12949	0.00153297	0.00204992	0.0056328	0.06	1.62345
1959.22	11.78	0.417	-0.734	4.82	0.1	0.213	5.99949	1.17949	0.00153297	0.00204355	0.00562007	0.06	1.62345
1960.21	11.78	0.417	-0.735	4.77	0.1	0.213	5.99949	1.22949	0.00153297	0.00203718	0.00560734	0.06	1.62345
1961.2	11.78	0.415	-0.735	4.725	0.1	0.213	5.99949	1.27449	0.00151369	0.00203718	0.00558806	0.06	1.62345
1962.29	11.76	0.415	-0.736	4.665	0.1	0.213	5.9893	1.3243	0.00151369	0.00203082	0.00557532	0.06	1.62345
1963.27	11.78	0.415	-0.737	4.615	0.1	0.213	5.99949	1.38449	0.00151369	0.00202445	0.00556259	0.06	1.62345
1964.26	11.78	0.417	-0.737	4.57	0.1	0.213	5.99949	1.42949	0.00153297	0.00202445	0.00558188	0.06	1.62345
1965.24	11.78	0.415	-0.738	4.525	0.1	0.213	5.99949	1.47449	0.00151369	0.00201808	0.00554986	0.06	1.62345
1966.22	11.76	0.415	-0.739	4.465	0.1	0.213	5.9893	1.5243	0.00151369	0.00201172	0.00553713	0.06	1.62345
1967.21	11.76	0.415	-0.739	4.43	0.1	0.213	5.9893	1.5593	0.00151369	0.00201172	0.00553713	0.06	1.62345
1968.19	11.76	0.415	-0.74	4.375	0.1	0.213	5.9893	1.6143	0.00151369	0.00200535	0.0055244	0.06	1.62345
1969.29	11.78	0.415	-0.741	4.315	0.1	0.213	5.99949	1.68449	0.00151369	0.00199899	0.00551166	0.06	1.62345
1970.27	11.76	0.415	-0.742	4.27	0.1	0.213	5.9893	1.7193	0.00151369	0.00199262	0.00549893	0.06	1.62345
1971.26	11.78	0.415	-0.742	4.22	0.1	0.213	5.99949	1.77949	0.00151369	0.00199262	0.00549893	0.06	1.62345
1972.24	11.76	0.415	-0.743	4.17	0.1	0.213	5.9893	1.8193	0.00151369	0.00198625	0.0054862	0.065	1.75874
1973.22	11.78	0.415	-0.744	4.125	0.1	0.213	5.99949	1.87449	0.00151369	0.00197989	0.00547347	0.065	1.75874
1974.21	11.78	0.415	-0.745	4.075	0.1	0.213	5.99949	1.92449	0.00151369	0.00197352	0.00546073	0.065	1.75874
1975.19	11.78	0.415	-0.745	4.025	0.1	0.213	5.99949	1.97449	0.00151369	0.00197352	0.00546073	0.065	1.75874
1976.29	11.78	0.415	-0.746	3.97	0.1	0.213	5.99949	2.02949	0.00151369	0.00196716	0.005448	0.065	1.75874
1977.27	11.78	0.415	-0.747	3.925	0.1	0.213	5.99949	2.07449	0.00151369	0.00196079	0.00543527	0.065	1.75874
1978.26	11.78	0.415	-0.748	3.865	0.1	0.213	5.99949	2.13449	0.00151369	0.00195442	0.00542254	0.065	1.75874
1979.24	11.78	0.415	-0.749	3.82	0.1	0.213	5.99949	2.17949	0.00151369	0.00194806	0.0054098	0.065	1.75874
1980.22	11.78	0.415	-0.75	3.77	0.1	0.213	5.99949	2.22949	0.00151369	0.00194169	0.00539707	0.07	1.89402
1981.21	11.78	0.415	-0.751	3.725	0.1	0.213	5.99949	2.27449	0.00151369	0.00193532	0.00538434	0.07	1.89402
1982.19	11.78	0.415	-0.752	3.67	0.1	0.213	5.99949	2.32949	0.00151369	0.00192896	0.00537161	0.07	1.89402
1983.29	11.78	0.415	-0.753	3.625	0.1	0.213	5.99949	2.37449	0.00151369	0.00192259	0.00535887	0.07	1.89402
1984.27	11.78	0.415	-0.754	3.57	0.1	0.213	5.99949	2.42949	0.00151369	0.00191623	0.00534614	0.07	1.89402
1985.26	11.78	0.415	-0.755	3.52	0.1	0.213	5.99949	2.47949	0.00151369	0.00190986	0.00533341	0.075	2.02931
1986.24	11.78	0.415	-0.755	3.475	0.1	0.213	5.99949	2.52449	0.00151369	0.00190986	0.00533341	0.075	2.02931
1987.22	11.78	0.415	-0.757	3.42	0.1	0.213	5.99949	2.57949	0.00151369	0.00189713	0.00530794	0.075	2.02931
1988.21	11.78	0.415	-0.757	3.38	0.1	0.213	5.99949	2.61949	0.00151369	0.00189713	0.00530794	0.075	2.02931
1989.19	11.78	0.415	-0.759	3.325	0.1	0.213	5.99949	2.67449	0.00151369	0.00188439	0.00528248	0.075	2.02931
1990.29	11.78	0.415	-0.76	3.27	0.1	0.213	5.99949	2.72949	0.00151369	0.00187803	0.00526975	0.075	2.02931
1991.27	11.78	0.415	-0.761	3.22	0.1	0.213	5.99949	2.77949	0.00151369	0.00187166	0.00525701	0.08	2.1646
1992.25	11.78	0.415	-0.762	3.165	0.1	0.213	5.99949	2.83449	0.00151369	0.0018653	0.00524428	0.08	2.1646
1993.24	11.78	0.415	-0.763	3.13	0.1	0.213	5.99949	2.86949	0.00151369	0.00185893	0.00523155	0.08	2.1646
1994.22	11.78	0.415	-0.764	3.07	0.1	0.213	5.99949	2.92949	0.00151369	0.00185256	0.00521882	0.085	2.29988
1995.21	11.78	0.415	-0.765	3.025	0.1	0.213	5.99949	2.97449	0.00151369	0.0018462	0.00520609	0.085	2.29988
1996.2	11.78	0.417	-0.766	2.97	0.1	0.213	5.99949	3.02949	0.00153297	0.00183983	0.00521264	0.085	2.29988
1997.29	11.78	0.415	-0.768	2.915	0.1	0.213	5.99949	3.08449	0.00151369	0.0018271	0.00516789	0.09	2.43517
1998.27	11.78	0.415	-0.769	2.87	0.1	0.213	5.99949	3.12949	0.00151369	0.00182073	0.00515516	0.09	2.43517
1999.25	11.78	0.417	-0.77	2.82	0.1	0.213	5.99949	3.17949	0.00153297	0.00181437	0.00516171	0.09	2.43517
2000.24	11.78	0.417	-0.771	2.77	0.1	0.213	5.99949	3.22949	0.00153297	0.001808	0.00514897	0.095	2.57046
2001.22	11.78	0.415	-0.772	2.72	0.1	0.213	5.99949	3.27949	0.00151369	0.00180163	0.00511696	0.095	2.57046
2002.21	11.78	0.417	-0.773	2.675	0.1	0.213	5.99949	3.32449	0.00153297	0.00179527	0.00512351	0.095	2.57046
2003.19	11.78	0.417	-0.774	2.625	0.1	0.213	5.99949	3.37449	0.00153297	0.0017889	0.00511078	0.095	2.57046
2004.29	11.78	0.415	-0.775	2.57	0.1	0.213	5.99949	3.42949	0.00151369	0.00178254	0.00507876	0.1	2.70575
2005.27	11.78	0.417	-0.776	2.515	0.1	0.213	5.99949	3.48449	0.00153297	0.00177617	0.00508531	0.1	2.70575
2006.26	11.78	0.417	-0.778	2.475	0.1	0.213	5.99949	3.52449	0.00153297	0.00176344	0.00505985	0.1	2.70575
2007.24	11.78	0.417	-0.779	2.44	0.1	0.213	5.99949	3.55949	0.00153297	0.00175707	0.00504711	0.105	2.84103
2008.22	11.78	0.417	-0.781	2.38	0.1	0.213	5.99949	3.61949	0.00153297	0.00174434	0.00502165	0.105	2.84103
2009.21	11.78	0.417	-0.783	2.335	0.1	0.213	5.99949	3.66449	0.00153297	0.00173161	0.00499618	0.11	2.97632
2010.2	11.76	0.417	-0.785	2.275	0.1	0.213	5.9893	3.7143	0.00153297	0.00171887	0.00497072	0.11	2.97632
2011.29	11.76	0.418	-0.787	2.225	0.1	0.213	5.9893	3.7643	0.00154261	0.00170614	0.0049549	0.115	3.11161
2012.27	11.76	0.418	-0.79	2.17	0.1	0.213	5.9893	3.8193	0.00154261	0.00168704	0.0049167	0.115	3.11161
2013.26	11.8	0.418	-0.792	2.175	0.1	0.213	6.00968	3.83468	0.00154261	0.00167431	0.00489123	0.12	3.2469
2014.24	11.8	0.418	-0.792	2.205	0.1	0.213	6.00968	3.80468	0.00154261	0.00167431	0.00489123	0.12	3.2469
2015.22	11.78	0.418	-0.792	2.22	0.1	0.213	5.99949	3.77949	0.00154261	0.00167431	0.00489123	0.125	3.38218
2016.21	11.78	0.418	-0.792	2.255	0.1	0.213	5.99949	3.74449	0.00154261	0.00167431	0.00489123	0.125	3.38218
2017.19	11.78	0.418	-0.792	2.255	0.1	0.213	5.99949	3.74449	0.00154261	0.00167431	0.00489123	0.125	3.38218
2018.29	11.78	0.418	-0.792	2.22	0.1	0.213	5.99949	3.77949	0.00154261	0.00167431	0.00489123	0.125	3.38218
2019.27	11.78	0.42	-0.792	2.19	0.1	0.213	5.99949	3.80949	0.0015619	0.00167431	0.00491052	0.125	3.38218
2020.25	11.78	0.418	-0.793	2.16	0.1	0.213	5.99949	3.83949	0.00154261	0.00166794	0.0048785	0.13	3.51747
2021.24	11.78	0.42	-0.793	2.14	0.1	0.213	5.99949	3.85949	0.0015619	0.00166794	0.00489779	0.13	3.51747
2022.22	11.76	0.418	-0.794	2.12	0.1	0.213	5.9893	3.8693	0.00154261	0.00166158	0.00486577	0.13	3.51747
2023.21	11.78	0.42	-0.795	2.11	0.1	0.213	5.99949	3.88949	0.0015619	0.00165521	0.00487232	0.13	3.51747
2024.19	11.76	0.42	-0.795	2.1	0.1	0.213	5.9893	3.8893	0.0015619	0.00165521	0.00487232	0.135	3.65276
2025.29	11.76	0.42	-0.796	2.09	0.1	0.213	5.9893	3.8993	0.0015619	0.00164885	0.00485959	0.135	3.65276
2026.27	11.76	0.42	-0.796	2.08	0.1	0.213	5.9893	3.9093	0.0015619	0.00164885	0.00485959	0.135	3.65276
2027.26	11.8	0.42	-0.797	2.08	0.1	0.213	6.00968	3.92968	0.0015619	0.00164248	0.00484686	0.135	3.65276
2028.24	11.78	0.42	-0.797	2.07	0.1	0.213	5.99949	3.92949	0.0015619	0.00164248	0.00484686	0.14	3.78805
2029.23	11.8	0.42	-0.797	2.065	0.1	0.213	6.00968	3.94468	0.0015619	0.00164248	0.00484686	0.14	3.78805
2030.21	11.78	0.42	-0.798	2.06	0.1	0.213	5.99949	3.93949	0.0015619	0.00163611	0.00483412	0.14	3.78805
2031.19	11.78	0.42	-0.798	2.055	0.1	0.213	5.99949	3.94449	0.0015619	0.00163611	0.00483412	0.14	3.78805
2032.29	11.78	0.42	-0.798	2.045	0.1	0.213	5.99949	3.95449	0.0015619	0.00163611	0.00483412	0.145	3.92333
2033.27	11.8	0.42	-0.799	2.04	0.1	0.213	6.00968	3.96968	0.0015619	0.00162975	0.00482139	0.145	3.92333
2034.26	11.78	0.42	-0.799	2.035	0.1	0.213	5.99949	3.96449	0.0015619	0.00162975	0.00482139	0.145	3.92333
2035.24	11.78	0.42	-0.799	2.03	0.1	0.213	5.99949	3.96949	0.0015619	0.00162975	0.00482139	0.145	3.92333
2036.22	11.78	0.42	-0.8	2.02	0.1	0.213	5.99949	3.97949	0.0015619	0.00162338	0.00480866	0.145	3.92333
2037.21	11.78	0.42	-0.8	2.02	0.1	0.213	5.99949	3.97949	0.0015619	0.00162338	0.00480866	0.145	3.92333
2038.2	11.78	0.42	-0.8	2.015	0.1	0.213	5.99949	3.98449	0.0015619	0.00162338	0.00480866	0.145	3.92333
2039.29	11.78	0.422	-0.801	2.01	0.1	0.213	5.99949	3.98949	0.00158118	0.00161701	0.00481521	0.15	4.05862
2040.27	11.78	0.42	-0.801	2.005	0.1	0.213	5.99949	3.99449	0.0015619	0.00161701	0.00479593	0.15	4.05862
2041.25	11.78	0.42	-0.801	2.005	0.1	0.213	5.99949	3.99449	0.0015619	0.00161701	0.00479593	0.15	4.05862
2042.24	11.78	0.422	-0.801	2.005	0.1	0.213	5.99949	3.99449	0.00158118	0.00161701	0.00481521	0.15	4.05862
2043.22	11.78	0.422	-0.801	2.005	0.1	0.213	5.99949	3.99449	0.00158118	0.00161701	0.00481521	0.15	4.05862
2044.21	11.78	0.422	-0.801	2	0.1	0.213	5.99949	3.99949	0.00158118	0.00161701	0.00481521	0.15	4.05862
2045.2	11.78	0.422	-0.802	2	0.1	0.213	5.99949	3.99949	0.00158118	0.00161065	0.00480248	0.15	4.05862
2046.29	11.78	0.422	-0.802	2	0.1	0.213	5.99949	3.99949	0.00158118	0.00161065	0.00480248	0.15	4.05862
2047.27	11.78	0.422	-0.802	2	0.1	0.213	5.99949	3.99949	0.00158118	0.00161065	0.00480248	0.155	4.19391
2048.26	11.78	0.42	-0.802	2	0.1	0.213	5.99949	3.99949	0.0015619	0.00161065	0.00478319	0.155	4.19391
2049.24	11.78	0.422	-0.802	2	0.1	0.213	5.99949	3.99949	0.00158118	0.00161065	0.00480248	0.155	4.19391
2050.22	11.78	0.42	-0.802	2	0.1	0.213	5.99949	3.99949	0.0015619	0.00161065	0.00478319	0.155	4.19391
2051.21	11.78	0.422	-0.802	2	0.1	0.213	5.99949	3.99949	0.00158118	0.00161065	0.00480248	0.155	4.19391
2052.19	11.78	0.422	-0.802	2	0.1	0.213	5.99949	3.99949	0.00158118	0.00161065	0.00480248	0.15	4.05862
2053.28	11.78	0.422	-0.802	2	0.1	0.213	5.99949	3.99949	0.00158118	0.00161065	0.00480248	0.155	4.19391
2054.27	11.78	0.422	-0.802	2	0.1	0.213	5.99949	3.99949	0.00158118	0.00161065	0.00480248	0.155	4.19391
2055.25	11.78	0.422	-0.802	2	0.1	0.213	5.99949	3.99949	0.00158118	0.00161065	0.00480248	0.155	4.19391
2056.24	11.78	0.422	-0.802	2	0.1	0.213	5.99949	3.99949	0.00158118	0.00161065	0.00480248	0.155	4.19391
2057.22	11.78	0.422	-0.802	2	0.1	0.213	5.99949	3.99949	0.00158118	0.00161065	0.00480248	0.155	4.19391
2058.21	11.78	0.422	-0.802	2	0.1	0.213	5.99949	3.99949	0.00158118	0.00161065	0.00480248	0.155	4.19391
2059.2	11.78	0.422	-0.803	2	0.1	0.213	5.99949	3.99949	0.00158118	0.00160428	0.00478974	0.155	4.19391
2060.29	11.78	0.42	-0.803	1.995	0.1	0.213	5.99949	4.00449	0.0015619	0.00160428	0.00477046	0.155	4.19391
2061.27	11.78	0.422	-0.803	2	0.1	0.213	5.99949	3.99949	0.00158118	0.00160428	0.00478974	0.155	4.19391
2062.26	11.78	0.422	-0.803	2	0.1	0.213	5.99949	3.99949	0.00158118	0.00160428	0.00478974	0.155	4.19391
2063.24	11.78	0.422	-0.803	2	0.1	0.213	5.99949	3.99949	0.00158118	0.00160428	0.00478974	0.155	4.19391
2064.23	11.78	0.422	-0.803	2	0.1	0.213	5.99949	3.99949	0.00158118	0.00160428	0.00478974	0.155	4.19391
2065.21	11.78	0.42	-0.803	2	0.1	0.213	5.99949	3.99949	0.0015619	0.00160428	0.00477046	0.155	4.19391
2066.19	11.78	0.422	-0.803	1.995	0.1	0.213	5.99949	4.00449	0.00158118	0.00160428	0.00478974	0.155	4.19391
2067.29	11.78	0.422	-0.803	2	0.1	0.213	5.99949	3.99949	0.00158118	0.00160428	0.00478974	0.155	4.19391
2068.27	11.78	0.422	-0.803	1.995	0.1	0.213	5.99949	4.00449	0.00158118	0.00160428	0.00478974	0.155	4.19391
2069.26	11.78	0.422	-0.803	2	0.1	0.213	5.99949	3.99949	0.00158118	0.00160428	0.00478974	0.155	4.19391
2070.24	11.78	0.422	-0.803	2	0.1	0.213	5.99949	3.99949	0.00158118	0.00160428	0.00478974	0.155	4.19391
2071.22	11.78	0.422	-0.803	2	0.1	0.213	5.99949	3.99949	0.00158118	0.00160428	0.00478974	0.155	4.19391
2072.21	11.78	0.422	-0.803	2	0.1	0.213	5.99949	3.99949	0.00158118	0.00160428	0.00478974	0.155	4.19391
2073.19	11.78	0.422	-0.803	2	0.1	0.213	5.99949	3.99949	0.00158118	0.00160428	0.00478974	0.155	4.19391
2074.28	11.78	0.422	-0.803	2	0.1	0.213	5.99949	3.99949	0.00158118	0.00160428	0.00478974	0.155	4.19391
2075.27	11.78	0.422	-0.803	2	0.1	0.213	5.99949	3.99949	0.00158118	0.00160428	0.00478974	0.155	4.19391
2076.26	11.76	0.422	-0.803	1.995	0.1	0.213	5.9893	3.9943	0.00158118	0.00160428	0.00478974	0.155	4.19391
2077.24	11.76	0.422	-0.803	2	0.1	0.213	5.9893	3.9893	0.00158118	0.00160428	0.00478974	0.155	4.19391
2078.22	11.76	0.422	-0.803	1.995	0.1	0.213	5.9893	3.9943	0.00158118	0.00160428	0.00478974	0.155	4.19391
2079.21	11.78	0.422	-0.803	2	0.1	0.213	5.99949	3.99949	0.00158118	0.00160428	0.00478974	0.155	4.19391
2080.2	11.78	0.422	-0.803	2	0.1	0.213	5.99949	3.99949	0.00158118	0.00160428	0.00478974	0.155	4.19391
2081.29	11.78	0.422	-0.803	2	0.1	0.213	5.99949	3.99949	0.00158118	0.00160428	0.00478974	0.155	4.19391
2082.27	11.78	0.422	-0.803	2	0.1	0.213	5.99949	3.99949	0.00158118	0.00160428	0.00478974	0.155	4.19391
2083.25	11.8	0.422	-0.803	2	0.1	0.213	6.00968	4.00968	0.00158118	0.00160428	0.00478974	0.155	4.19391
2084.24	11.78	0.422	-0.803	2	0.1	0.213	5.99949	3.99949	0.00158118	0.00160428	0.00478974	0.155	4.19391
2085.22	11.78	0.423	-0.803	2	0.1	0.213	5.99949	3.99949	0.00159082	0.00160428	0.00479939	0.155	4.19391
2086.21	11.78	0.422	-0.803	2	0.1	0.213	5.99949	3.99949	0.00158118	0.00160428	0.00478974	0.155	4.19391
2087.19	11.78	0.422	-0.803	2	0.1	0.213	5.99949	3.99949	0.00158118	0.00160428	0.00478974	0.155	4.19391
2088.28	11.78	0.422	-0.803	2	0.1	0.213	5.99949	3.99949	0.00158118	0.00160428	0.00478974	0.155	4.19391
2089.27	11.78	0.422	-0.803	2	0.1	0.213	5.99949	3.99949	0.00158118	0.00160428	0.00478974	0.155	4.19391
2090.26	11.78	0.422	-0.803	2	0.1	0.213	5.99949	3.99949	0.00158118	0.00160428	0.00478974	0.155	4.19391
2091.24	11.78	0.422	-0.803	2	0.1	0.213	5.99949	3.99949	0.00158118	0.00160428	0.00478974	0.16	4.32919
2092.22	11.78	0.422	-0.803	2	0.1	0.213	5.99949	3.99949	0.00158118	0.00160428	0.00478974	0.155	4.19391
2093.21	11.78	0.422	-0.803	2	0.1	0.213	5.99949	3.99949	0.00158118	0.00160428	0.00478974	0.155	4.19391
2094.2	11.78	0.422	-0.803	2	0.1	0.213	5.99949	3.99949	0.00158118	0.00160428	0.00478974	0.155	4.19391
2095.28	11.78	0.422	-0.803	2	0.1	0.213	5.99949	3.99949	0.00158118	0.00160428	0.00478974	0.155	4.19391
2096.27	11.78	0.422	-0.804	2	0.1	0.213	5.99949	3.99949	0.00158118	0.00159792	0.00477701	0.155	4.19391
2097.25	11.78	0.423	-0.804	2	0.1	0.213	5.99949	3.99949	0.00159082	0.00159792	0.00478665	0.16	4.32919
2098.24	11.78	0.422	-0.804	2	0.1	0.213	5.99949	3.99949	0.00158118	0.00159792	0.00477701	0.16	4.32919
2099.22	11.78	0.423	-0.804	2	0.1	0.213	5.99949	3.99949	0.00159082	0.00159792	0.00478665	0.16	4.32919
2100.21	11.78	0.422	-0.804	2	0.1	0.213	5.99949	3.99949	0.00158118	0.00159792	0.00477701	0.155	4.19391
2101.2	11.78	0.422	-0.804	2	0.1	0.213	5.99949	3.99949	0.00158118	0.00159792	0.00477701	0.155	4.19391
2102.29	11.78	0.423	-0.804	2	0.1	0.213	5.99949	3.99949	0.00159082	0.00159792	0.00478665	0.16	4.32919
2103.27	11.78	0.422	-0.804	2	0.1	0.213	5.99949	3.99949	0.00158118	0.00159792	0.00477701	0.16	4.32919
2104.25	11.78	0.423	-0.804	2	0.1	0.213	5.99949	3.99949	0.00159082	0.00159792	0.00478665	0.16	4.32919
2105.24	11.78	0.423	-0.804	2	0.1	0.213	5.99949	3.99949	0.00159082	0.00159792	0.00478665	0.16	4.32919
2106.22	11.78	0.423	-0.804	2	0.1	0.213	5.99949	3.99949	0.00159082	0.00159792	0.00478665	0.16	4.32919
2107.21	11.78	0.422	-0.804	2	0.1	0.213	5.99949	3.99949	0.00158118	0.00159792	0.00477701	0.16	4.32919
2108.19	11.78	0.423	-0.804	2	0.1	0.213	5.99949	3.99949	0.00159082	0.00159792	0.00478665	0.16	4.32919
2109.28	11.78	0.422	-0.804	2	0.1	0.213	5.99949	3.99949	0.00158118	0.00159792	0.00477701	0.16	4.32919
2110.27	11.78	0.422	-0.804	2	0.1	0.213	5.99949	3.99949	0.00158118	0.00159792	0.00477701	0.16	4.32919
2111.25	11.78	0.422	-0.804	2	0.1	0.213	5.99949	3.99949	0.00158118	0.00159792	0.00477701	0.16	4.32919
2112.24	11.78	0.423	-0.804	2	0.1	0.213	5.99949	3.99949	0.00159082	0.00159792	0.00478665	0.16	4.32919
2113.22	11.78	0.423	-0.804	2	0.1	0.213	5.99949	3.99949	0.00159082	0.00159792	0.00478665	0.16	4.32919
2114.21	11.78	0.422	-0.804	2	0.1	0.213	5.99949	3.99949	0.00158118	0.00159792	0.00477701	0.16	4.32919
2115.2	11.78	0.423	-0.804	2	0.1	0.213	5.99949	3.99949	0.00159082	0.00159792	0.00478665	0.16	4.32919
2116.29	11.78	0.423	-0.804	2	0.1	0.213	5.99949	3.99949	0.00159082	0.00159792	0.00478665	0.16	4.32919
2117.27	11.78	0.422	-0.804	2	0.1	0.213	5.99949	3.99949	0.00158118	0.00159792	0.00477701	0.16	4.32919
2118.26	11.78	0.422	-0.804	2	0.1	0.213	5.99949	3.99949	0.00158118	0.00159792	0.00477701	0.16	4.32919
2119.24	11.78	0.422	-0.804	2	0.1	0.213	5.99949	3.99949	0.00158118	0.00159792	0.00477701	0.16	4.32919
2120.22	11.78	0.422	-0.804	2	0.1	0.213	5.99949	3.99949	0.00158118	0.00159792	0.00477701	0.16	4.32919
2121.21	11.78	0.422	-0.804	2	0.1	0.213	5.99949	3.99949	0.00158118	0.00159792	0.00477701	0.16	4.32919
2122.19	11.78	0.422	-0.804	2	0.1	0.213	5.99949	3.99949	0.00158118	0.00159792	0.00477701	0.16	4.32919
2123.29	11.78	0.423	-0.804	2	0.1	0.213	5.99949	3.99949	0.00159082	0.00159792	0.00478665	0.16	4.32919
2124.27	11.78	0.422	-0.804	2	0.1	0.213	5.99949	3.99949	0.00158118	0.00159792	0.00477701	0.16	4.32919
2125.25	11.78	0.422	-0.804	2	0.1	0.213	5.99949	3.99949	0.00158118	0.00159792	0.00477701	0.16	4.32919
2126.24	11.78	0.423	-0.804	1.995	0.1	0.213	5.99949	4.00449	0.00159082	0.00159792	0.00478665	0.16	4.32919
2127.22	11.78	0.422	-0.804	2	0.1	0.213	5.99949	3.99949	0.00158118	0.00159792	0.00477701	0.16	4.32919
2128.21	11.78	0.422	-0.804	2	0.1	0.213	5.99949	3.99949	0.00158118	0.00159792	0.00477701	0.16	4.32919
2129.19	11.78	0.422	-0.804	2	0.1	0.213	5.99949	3.99949	0.00158118	0.00159792	0.00477701	0.16	4.32919
2130.28	11.78	0.422	-0.804	2	0.1	0.213	5.99949	3.99949	0.00158118	0.00159792	0.00477701	0.16	4.32919
2131.27	11.78	0.423	-0.804	2	0.1	0.213	5.99949	3.99949	0.00159082	0.00159792	0.00478665	0.16	4.32919
2132.26	11.78	0.422	-0.804	2	0.1	0.213	5.99949	3.99949	0.00158118	0.00159792	0.00477701	0.16	4.32919
2133.24	11.78	0.423	-0.804	2	0.1	0.213	5.99949	3.99949	0.00159082	0.00159792	0.00478665	0.16	4.32919
2134.23	11.78	0.422	-0.804	2	0.1	0.213	5.99949	3.99949	0.00158118	0.00159792	0.00477701	0.16	4.32919
2135.21	11.78	0.423	-0.804	2	0.1	0.213	5.99949	3.99949	0.00159082	0.00159792	0.00478665	0.16	4.32919
2136.2	11.78	0.423	-0.804	2	0.1	0.213	5.99949	3.99949	0.00159082	0.00159792	0.00478665	0.16	4.32919
2137.29	11.78	0.422	-0.804	2	0.1	0.213	5.99949	3.99949	0.00158118	0.00159792	0.00477701	0.16	4.32919
2138.27	11.78	0.422	-0.804	2	0.1	0.213	5.99949	3.99949	0.00158118	0.00159792	0.00477701	0.16	4.32919
2139.26	11.78	0.423	-0.804	2	0.1	0.213	5.99949	3.99949	0.00159082	0.00159792	0.00478665	0.16	4.32919
2140.24	11.78	0.423	-0.804	2	0.1	0.213	5.99949	3.99949	0.00159082	0.00159792	0.00478665	0.16	4.32919
2141.22	11.78	0.422	-0.804	2	0.1	0.213	5.99949	3.99949	0.00158118	0.00159792	0.00477701	0.16	4.32919
2142.21	11.76	0.423	-0.804	1.995	0.1	0.213	5.9893	3.9943	0.00159082	0.00159792	0.00478665	0.16	4.32919
2143.19	11.76	0.423	-0.804	2	0.1	0.213	5.9893	3.9893	0.00159082	0.00159792	0.00478665	0.16	4.32919
2144.29	11.76	0.423	-0.804	1.995	0.1	0.213	5.9893	3.9943	0.00159082	0.00159792	0.00478665	0.16	4.32919
2145.27	11.8	0.423	-0.804	2	0.1	0.213	6.00968	4.00968	0.00159082	0.00159792	0.00478665	0.16	4.32919
2146.26	11.88	0.423	-0.804	2	0.1	0.213	6.05042	4.05042	0.00159082	0.00159792	0.00478665	0.16	4.32919
2147.24	11.92	0.423	-0.804	2	0.1	0.213	6.07079	4.07079	0.00159082	0.00159792	0.00478665	0.16	4.32919
2148.22	11.98	0.425	-0.804	2	0.1	0.213	6.10135	4.10135	0.0016101	0.00159792	0.00480594	0.16	4.32919
2149.21	12.04	0.425	-0.804	2	0.1	0.213	6.13191	4.13191	0.0016101	0.00159792	0.00480594	0.16	4.32919
2150.2	12.06	0.427	-0.805	2	0.1	0.213	6.14209	4.14209	0.00162939	0.00159155	0.00481249	0.16	4.32919
2151.28	12.12	0.427	-0.805	2.005	0.1	0.213	6.17265	4.16765	0.00162939	0.00159155	0.00481249	0.16	4.32919
2152.27	12.16	0.427	-0.805	2.005	0.1	0.213	6.19302	4.18802	0.00162939	0.00159155	0.00481249	0.16	4.32919
2153.26	12.2	0.428	-0.805	2	0.1	0.213	6.21339	4.21339	0.00163903	0.00159155	0.00482213	0.16	4.32919
2154.24	12.24	0.428	-0.805	2	0.1	0.213	6.23377	4.23377	0.00163903	0.00159155	0.00482213	0.16	4.32919
2155.22	12.3	0.428	-0.805	2	0.1	0.213	6.26432	4.26432	0.00163903	0.00159155	0.00482213	0.16	4.32919
2156.21	12.34	0.43	-0.805	1.995	0.1	0.213	6.2847	4.2897	0.00165831	0.00159155	0.00484141	0.16	4.32919
2157.19	12.4	0.43	-0.805	1.995	0.1	0.213	6.31525	4.32025	0.00165831	0.00159155	0.00484141	0.16	4.32919
2158.28	12.46	0.432	-0.805	2	0.1	0.213	6.34581	4.34581	0.00167759	0.00159155	0.00486069	0.16	4.32919
2159.27	12.5	0.432	-0.805	2	0.1	0.213	6.36618	4.36618	0.00167759	0.00159155	0.00486069	0.16	4.32919
2160.25	12.56	0.433	-0.806	2	0.1	0.213	6.39674	4.39674	0.00168723	0.00158518	0.0048576	0.16	4.32919
2161.24	12.6	0.433	-0.806	2	0.1	0.213	6.41711	4.41711	0.00168723	0.00158518	0.0048576	0.16	4.32919
2162.22	12.62	0.433	-0.806	2	0.1	0.213	6.4273	4.4273	0.00168723	0.00158518	0.0048576	0.16	4.32919
2163.21	12.7	0.435	-0.806	2	0.1	0.213	6.46804	4.46804	0.00170652	0.00158518	0.00487688	0.16	4.32919
2164.19	12.78	0.437	-0.806	2	0.1	0.213	6.50879	4.50879	0.0017258	0.00158518	0.00489617	0.16	4.32919
2165.29	12.8	0.437	-0.806	2	0.1	0.213	6.51897	4.51897	0.0017258	0.00158518	0.00489617	0.16	4.32919
2166.27	12.86	0.437	-0.806	2	0.1	0.213	6.54953	4.54953	0.0017258	0.00158518	0.00489617	0.16	4.32919
2167.26	12.9	0.437	-0.806	2	0.1	0.213	6.5699	4.5699	0.0017258	0.00158518	0.00489617	0.16	4.32919
2168.24	12.96	0.438	-0.807	2	0.1	0.213	6.60046	4.60046	0.00173544	0.00157882	0.00489308	0.16	4.32919
2169.23	13.02	0.438	-0.807	2	0.1	0.213	6.63102	4.63102	0.00173544	0.00157882	0.00489308	0.16	4.32919
2170.21	13.06	0.44	-0.807	2	0.1	0.213	6.65139	4.65139	0.00175472	0.00157882	0.00491236	0.16	4.32919
2171.2	13.1	0.44	-0.807	2	0.1	0.213	6.67176	4.67176	0.00175472	0.00157882	0.00491236	0.16	4.32919
2172.28	13.14	0.442	-0.807	2	0.1	0.213	6.69213	4.69213	0.00177401	0.00157882	0.00493164	0.16	4.32919
2173.27	13.2	0.442	-0.807	2	0.1	0.213	6.72269	4.72269	0.00177401	0.00157882	0.00493164	0.16	4.32919
2174.25	13.26	0.443	-0.807	2	0.1	0.213	6.75325	4.75325	0.00178365	0.00157882	0.00494128	0.16	4.32919
2175.24	13.3	0.443	-0.808	2	0.1	0.213	6.77362	4.77362	0.00178365	0.00157245	0.00492855	0.16	4.32919
2176.22	13.36	0.445	-0.808	2	0.1	0.213	6.80418	4.80418	0.00180293	0.00157245	0.00494783	0.16	4.32919
2177.21	13.38	0.445	-0.808	2	0.1	0.213	6.81436	4.81436	0.00180293	0.00157245	0.00494783	0.16	4.32919
2178.19	13.46	0.447	-0.808	2	0.1	0.213	6.85511	4.85511	0.00182221	0.00157245	0.00496712	0.16	4.32919
2179.28	13.5	0.447	-0.808	2	0.1	0.213	6.87548	4.87548	0.00182221	0.00157245	0.00496712	0.16	4.32919
2180.27	13.58	0.448	-0.808	2	0.1	0.213	6.91622	4.91622	0.00183185	0.00157245	0.00497676	0.155	4.19391
2181.26	13.6	0.448	-0.809	2	0.1	0.213	6.92641	4.92641	0.00183185	0.00156608	0.00496402	0.155	4.19391
2182.24	13.66	0.45	-0.809	2	0.1	0.213	6.95696	4.95696	0.00185114	0.00156608	0.00498331	0.155	4.19391
2183.22	13.7	0.45	-0.809	2	0.1	0.213	6.97734	4.97734	0.00185114	0.00156608	0.00498331	0.155	4.19391
2184.21	13.76	0.452	-0.809	2	0.1	0.213	7.00789	5.00789	0.00187042	0.00156608	0.00500259	0.16	4.32919
2185.2	13.82	0.452	-0.809	2	0.1	0.213	7.03845	5.03845	0.00187042	0.00156608	0.00500259	0.16	4.32919
2186.28	13.86	0.453	-0.81	2	0.1	0.213	7.05882	5.05882	0.00188006	0.00155972	0.0049995	0.16	4.32919
2187.27	13.88	0.453	-0.81	2	0.1	0.213	7.06901	5.06901	0.00188006	0.00155972	0.0049995	0.16	4.32919
2188.26	13.96	0.455	-0.81	2	0.1	0.213	7.10975	5.10975	0.00189934	0.00155972	0.00501878	0.155	4.19391
2189.24	14	0.455	-0.81	2	0.1	0.213	7.13012	5.13012	0.00189934	0.00155972	0.00501878	0.155	4.19391
2190.22	14.06	0.457	-0.81	2	0.1	0.213	7.16068	5.16068	0.00191863	0.00155972	0.00503806	0.155	4.19391
2191.21	14.1	0.457	-0.811	2	0.1	0.213	7.18105	5.18105	0.00191863	0.00155335	0.00502533	0.155	4.19391
2192.19	14.14	0.458	-0.811	2	0.1	0.213	7.20143	5.20143	0.00192827	0.00155335	0.00503497	0.16	4.32919
2193.29	14.18	0.46	-0.811	2	0.1	0.213	7.2218	5.2218	0.00194755	0.00155335	0.00505426	0.16	4.32919
2194.27	14.26	0.462	-0.811	2	0.1	0.213	7.26254	5.26254	0.00196683	0.00155335	0.00507354	0.16	4.32919
2195.25	14.3	0.463	-0.811	2	0.1	0.213	7.28291	5.28291	0.00197648	0.00155335	0.00508318	0.16	4.32919
2196.24	14.36	0.465	-0.812	2	0.1	0.213	7.31347	5.31347	0.00199576	0.00154699	0.00508973	0.155	4.19391
2197.22	14.4	0.467	-0.812	2	0.1	0.213	7.33384	5.33384	0.00201504	0.00154699	0.00510901	0.155	4.19391
2198.21	14.44	0.468	-0.812	2	0.1	0.213	7.35421	5.35421	0.00202468	0.00154699	0.00511865	0.155	4.19391
2199.19	14.5	0.47	-0.812	2	0.1	0.213	7.38477	5.38477	0.00204396	0.00154699	0.00513794	0.155	4.19391
2200.28	14.56	0.472	-0.812	2	0.1	0.213	7.41533	5.41533	0.00206325	0.00154699	0.00515722	0.155	4.19391
2201.27	14.58	0.472	-0.813	2	0.1	0.213	7.42552	5.42552	0.00206325	0.00154062	0.00514449	0.16	4.32919
2202.26	14.66	0.473	-0.813	2	0.1	0.213	7.46626	5.46626	0.00207289	0.00154062	0.00515413	0.155	4.19391
2203.24	14.7	0.475	-0.813	2	0.1	0.213	7.48663	5.48663	0.00209217	0.00154062	0.00517341	0.155	4.19391
2204.22	14.76	0.477	-0.813	2	0.1	0.213	7.51719	5.51719	0.00211145	0.00154062	0.00519269	0.155	4.19391
2205.21	14.8	0.478	-0.813	2	0.1	0.213	7.53756	5.53756	0.0021211	0.00154062	0.00520233	0.155	4.19391
2206.2	14.86	0.48	-0.814	2	0.1	0.213	7.56812	5.56812	0.00214038	0.00153425	0.00520889	0.155	4.19391
2207.29	14.9	0.482	-0.814	2	0.1	0.213	7.58849	5.58849	0.00215966	0.00153425	0.00522817	0.155	4.19391
2208.27	14.96	0.483	-0.814	2	0.1	0.213	7.61905	5.61905	0.0021693	0.00153425	0.00523781	0.155	4.19391
2209.26	15	0.485	-0.814	2	0.1	0.213	7.63942	5.63942	0.00218858	0.00153425	0.00525709	0.155	4.19391
2210.24	15.06	0.487	-0.814	2	0.1	0.213	7.66998	5.66998	0.00220787	0.00153425	0.00527637	0.155	4.19391
2211.22	15.1	0.487	-0.815	2	0.1	0.213	7.69035	5.69035	0.00220787	0.00152789	0.00526364	0.155	4.19391
2212.21	15.16	0.488	-0.815	2	0.1	0.213	7.72091	5.72091	0.00221751	0.00152789	0.00527328	0.155	4.19391
2213.2	15.2	0.49	-0.815	2	0.1	0.213	7.74128	5.74128	0.00223679	0.00152789	0.00529257	0.155	4.19391
2214.28	15.28	0.492	-0.815	2	0.1	0.213	7.78202	5.78202	0.00225607	0.00152789	0.00531185	0.155	4.19391
2215.27	15.3	0.493	-0.816	2	0.1	0.213	7.79221	5.79221	0.00226572	0.00152152	0.00530876	0.155	4.19391
2216.25	15.36	0.495	-0.816	2	0.1	0.213	7.82277	5.82277	0.002285	0.00152152	0.00532804	0.155	4.19391
2217.24	15.4	0.497	-0.816	2	0.1	0.213	7.84314	5.84314	0.00230428	0.00152152	0.00534732	0.155	4.19391
2218.22	15.46	0.498	-0.816	2	0.1	0.213	7.87369	5.87369	0.00231392	0.00152152	0.00535696	0.155	4.19391
2219.21	15.5	0.498	-0.816	2	0.1	0.213	7.89407	5.89407	0.00231392	0.00152152	0.00535696	0.155	4.19391
2220.2	15.52	0.5	-0.817	2	0.1	0.213	7.90425	5.90425	0.0023332	0.00151516	0.00536351	0.155	4.19391
2221.28	15.52	0.5	-0.817	2	0.1	0.213	7.90425	5.90425	0.0023332	0.00151516	0.00536351	0.155	4.19391
2222.27	15.52	0.5	-0.817	2	0.1	0.213	7.90425	5.90425	0.0023332	0.00151516	0.00536351	0.155	4.19391
2223.26	15.52	0.502	-0.817	2	0.1	0.213	7.90425	5.90425	0.00235249	0.00151516	0.0053828	0.155	4.19391
2224.24	15.54	0.502	-0.817	2	0.1	0.213	7.91444	5.91444	0.00235249	0.00151516	0.0053828	0.155	4.19391
2225.22	15.54	0.502	-0.817	2	0.1	0.213	7.91444	5.91444	0.00235249	0.00151516	0.0053828	0.155	4.19391
2226.21	15.54	0.502	-0.817	2	0.1	0.213	7.91444	5.91444	0.00235249	0.00151516	0.0053828	0.155	4.19391
2227.19	15.52	0.502	-0.817	2	0.1	0.213	7.90425	5.90425	0.00235249	0.00151516	0.0053828	0.155	4.19391
2228.28	15.54	0.502	-0.818	2	0.1	0.213	7.91444	5.91444	0.00235249	0.00150879	0.00537007	0.155	4.19391
2229.27	15.54	0.502	-0.818	2	0.1	0.213	7.91444	5.91444	0.00235249	0.00150879	0.00537007	0.155	4.19391
2230.25	15.56	0.504	-0.818	2	0.1	0.213	7.92462	5.92462	0.00237177	0.00150879	0.00538935	0.155	4.19391
2231.24	15.56	0.504	-0.818	2	0.1	0.213	7.92462	5.92462	0.00237177	0.00150879	0.00538935	0.155	4.19391
2232.22	15.56	0.504	-0.818	2	0.1	0.213	7.92462	5.92462	0.00237177	0.00150879	0.00538935	0.155	4.19391
2233.21	15.56	0.504	-0.818	2	0.1	0.213	7.92462	5.92462	0.00237177	0.00150879	0.00538935	0.155	4.19391
2234.19	15.58	0.504	-0.818	2	0.1	0.213	7.93481	5.93481	0.00237177	0.00150879	0.00538935	0.155	4.19391
2235.29	15.58	0.504	-0.818	2	0.1	0.213	7.93481	5.93481	0.00237177	0.00150879	0.00538935	0.155	4.19391
2236.27	15.58	0.504	-0.818	2	0.1	0.213	7.93481	5.93481	0.00237177	0.00150879	0.00538935	0.155	4.19391
2237.25	15.58	0.504	-0.818	2	0.1	0.213	7.93481	5.93481	0.00237177	0.00150879	0.00538935	0.155	4.19391
2238.24	15.6	0.504	-0.818	2	0.1	0.213	7.945	5.945	0.00237177	0.00150879	0.00538935	0.155	4.19391
2239.22	15.6	0.505	-0.818	2	0.1	0.213	7.945	5.945	0.00238141	0.00150879	0.00539899	0.155	4.19391
2240.21	15.6	0.505	-0.818	2	0.1	0.213	7.945	5.945	0.00238141	0.00150879	0.00539899	0.155	4.19391
2241.19	15.6	0.505	-0.818	2	0.1	0.213	7.945	5.945	0.00238141	0.00150879	0.00539899	0.155	4.19391
2242.28	15.62	0.505	-0.818	2	0.1	0.213	7.95518	5.95518	0.00238141	0.00150879	0.00539899	0.155	4.19391
2243.27	15.62	0.505	-0.818	2	0.1	0.213	7.95518	5.95518	0.00238141	0.00150879	0.00539899	0.155	4.19391
2244.26	15.64	0.505	-0.818	2	0.1	0.213	7.96537	5.96537	0.00238141	0.00150879	0.00539899	0.155	4.19391
2245.24	15.64	0.505	-0.818	2.005	0.1	0.213	7.96537	5.96037	0.00238141	0.00150879	0.00539899	0.155	4.19391
2246.22	15.64	0.507	-0.818	2	0.1	0.213	7.96537	5.96537	0.00240069	0.00150879	0.00541827	0.155	4.19391
2247.21	15.62	0.505	-0.818	2	0.1	0.213	7.95518	5.95518	0.00238141	0.00150879	0.00539899	0.155	4.19391
2248.19	15.62	0.507	-0.818	1.995	0.1	0.213	7.95518	5.96018	0.00240069	0.00150879	0.00541827	0.155	4.19391
2249.28	15.62	0.505	-0.818	1.995	0.1	0.213	7.95518	5.96018	0.00238141	0.00150879	0.00539899	0.155	4.19391
2250.27	15.64	0.507	-0.818	2	0.1	0.213	7.96537	5.96537	0.00240069	0.00150879	0.00541827	0.155	4.19391
2251.26	15.64	0.507	-0.818	2	0.1	0.213	7.96537	5.96537	0.00240069	0.00150879	0.00541827	0.155	4.19391
2252.24	15.64	0.507	-0.818	2	0.1	0.213	7.96537	5.96537	0.00240069	0.00150879	0.00541827	0.155	4.19391
2253.22	15.64	0.507	-0.818	2	0.1	0.213	7.96537	5.96537	0.00240069	0.00150879	0.00541827	0.155	4.19391
2254.21	15.64	0.507	-0.818	2	0.1	0.213	7.96537	5.96537	0.00240069	0.00150879	0.00541827	0.155	4.19391
2255.19	15.66	0.507	-0.818	2	0.1	0.213	7.97555	5.97555	0.00240069	0.00150879	0.00541827	0.155	4.19391
2256.29	15.66	0.507	-0.818	2	0.1	0.213	7.97555	5.97555	0.00240069	0.00150879	0.00541827	0.155	4.19391
2257.27	15.66	0.507	-0.818	2	0.1	0.213	7.97555	5.97555	0.00240069	0.00150879	0.00541827	0.155	4.19391
2258.26	15.66	0.507	-0.818	2	0.1	0.213	7.97555	5.97555	0.00240069	0.00150879	0.00541827	0.155	4.19391
2259.24	15.66	0.507	-0.818	2	0.1	0.213	7.97555	5.97555	0.00240069	0.00150879	0.00541827	0.155	4.19391
2260.22	15.68	0.509	-0.818	2	0.1	0.213	7.98574	5.98574	0.00241998	0.00150879	0.00543755	0.155	4.19391
2261.21	15.68	0.507	-0.818	2	0.1	0.213	7.98574	5.98574	0.00240069	0.00150879	0.00541827	0.155	4.19391
2262.19	15.68	0.507	-0.818	2	0.1	0.213	7.98574	5.98574	0.00240069	0.00150879	0.00541827	0.155	4.19391
2263.29	15.68	0.507	-0.818	2	0.1	0.213	7.98574	5.98574	0.00240069	0.00150879	0.00541827	0.155	4.19391
2264.27	15.68	0.507	-0.818	2	0.1	0.213	7.98574	5.98574	0.00240069	0.00150879	0.00541827	0.155	4.19391
2265.25	15.68	0.507	-0.818	2	0.1	0.213	7.98574	5.98574	0.00240069	0.00150879	0.00541827	0.155	4.19391
2266.24	15.7	0.507	-0.818	2	0.1	0.213	7.99593	5.99593	0.00240069	0.00150879	0.00541827	0.155	4.19391
2267.22	15.7	0.509	-0.818	1.995	0.1	0.213	7.99593	6.00093	0.00241998	0.00150879	0.00543755	0.155	4.19391
2268.21	15.68	0.509	-0.818	2	0.1	0.213	7.98574	5.98574	0.00241998	0.00150879	0.00543755	0.155	4.19391
2269.19	15.68	0.509	-0.818	2	0.1	0.213	7.98574	5.98574	0.00241998	0.00150879	0.00543755	0.155	4.19391
2270.29	15.7	0.509	-0.818	2	0.1	0.213	7.99593	5.99593	0.00241998	0.00150879	0.00543755	0.155	4.19391
2271.27	15.7	0.509	-0.818	2	0.1	0.213	7.99593	5.99593	0.00241998	0.00150879	0.00543755	0.155	4.19391
2272.26	15.7	0.509	-0.818	2	0.1	0.213	7.99593	5.99593	0.00241998	0.00150879	0.00543755	0.155	4.19391
2273.24	15.7	0.509	-0.818	2	0.1	0.213	7.99593	5.99593	0.00241998	0.00150879	0.00543755	0.155	4.19391
2274.23	15.7	0.509	-0.818	2	0.1	0.213	7.99593	5.99593	0.00241998	0.00150879	0.00543755	0.155	4.19391
2275.21	15.7	0.509	-0.818	2	0.1	0.213	7.99593	5.99593	0.00241998	0.00150879	0.00543755	0.155	4.19391
2276.2	15.7	0.509	-0.818	2	0.1	0.213	7.99593	5.99593	0.00241998	0.00150879	0.00543755	0.155	4.19391
2277.28	15.7	0.509	-0.818	2	0.1	0.213	7.99593	5.99593	0.00241998	0.00150879	0.00543755	0.155	4.19391
2278.27	15.7	0.509	-0.818	2	0.1	0.213	7.99593	5.99593	0.00241998	0.00150879	0.00543755	0.155	4.19391
2279.26	15.7	0.509	-0.818	2	0.1	0.213	7.99593	5.99593	0.00241998	0.00150879	0.00543755	0.155	4.19391
2280.24	15.7	0.509	-0.818	2	0.1	0.213	7.99593	5.99593	0.00241998	0.00150879	0.00543755	0.155	4.19391
2281.22	15.7	0.509	-0.818	2	0.1	0.213	7.99593	5.99593	0.00241998	0.00150879	0.00543755	0.155	4.19391
2282.21	15.7	0.509	-0.818	2	0.1	0.213	7.99593	5.99593	0.00241998	0.00150879	0.00543755	0.155	4.19391
2283.2	15.7	0.509	-0.818	2	0.1	0.213	7.99593	5.99593	0.00241998	0.00150879	0.00543755	0.155	4.19391
2284.29	15.7	0.509	-0.818	2	0.1	0.213	7.99593	5.99593	0.00241998	0.00150879	0.00543755	0.155	4.19391
2285.27	15.7	0.509	-0.818	2	0.1	0.213	7.99593	5.99593	0.00241998	0.00150879	0.00543755	0.155	4.19391
2286.26	15.7	0.509	-0.818	2	0.1	0.213	7.99593	5.99593	0.00241998	0.00150879	0.00543755	0.155	4.19391
2287.24	15.7	0.509	-0.818	2	0.1	0.213	7.99593	5.99593	0.00241998	0.00150879	0.00543755	0.155	4.19391
2288.22	15.7	0.509	-0.818	2	0.1	0.213	7.99593	5.99593	0.00241998	0.00150879	0.00543755	0.155	4.19391
2289.21	15.7	0.509	-0.818	1.995	0.1	0.213	7.99593	6.00093	0.00241998	0.00150879	0.00543755	0.155	4.19391
2290.2	15.7	0.509	-0.818	1.995	0.1	0.213	7.99593	6.00093	0.00241998	0.00150879	0.00543755	0.155	4.19391
2291.29	15.7	0.509	-0.818	1.995	0.1	0.213	7.99593	6.00093	0.00241998	0.00150879	0.00543755	0.155	4.19391
2292.27	15.7	0.51	-0.818	2	0.1	0.213	7.99593	5.99593	0.00242962	0.00150879	0.0054472	0.155	4.19391
2293.26	15.72	0.51	-0.818	2	0.1	0.213	8.00611	6.00611	0.00242962	0.00150879	0.0054472	0.155	4.19391
2294.24	15.72	0.509	-0.818	2.005	0.1	0.213	8.00611	6.00111	0.00241998	0.00150879	0.00543755	0.155	4.19391
2295.22	15.72	0.51	-0.818	2.005	0.1	0.213	8.00611	6.00111	0.00242962	0.00150879	0.0054472	0.155	4.19391
2296.21	15.74	0.51	-0.818	2.005	0.1	0.213	8.0163	6.0113	0.00242962	0.00150879	0.0054472	0.155	4.19391
2297.19	15.72	0.51	-0.818	2	0.1	0.213	8.00611	6.00611	0.00242962	0.00150879	0.0054472	0.155	4.19391
2298.29	15.72	0.51	-0.818	2	0.1	0.213	8.00611	6.00611	0.00242962	0.00150879	0.0054472	0.155	4.19391
2299.27	15.7	0.51	-0.818	2	0.1	0.213	7.99593	5.99593	0.00242962	0.00150879	0.0054472	0.155	4.19391
2300.25	15.7	0.51	-0.818	1.995	0.1	0.213	7.99593	6.00093	0.00242962	0.00150879	0.0054472	0.155	4.19391
2301.24	15.7	0.51	-0.818	1.995	0.1	0.213	7.99593	6.00093	0.00242962	0.00150879	0.0054472	0.155	4.19391
2302.22	15.7	0.51	-0.818	1.995	0.1	0.213	7.99593	6.00093	0.00242962	0.00150879	0.0054472	0.155	4.19391
2303.21	15.7	0.51	-0.818	1.995	0.1	0.213	7.99593	6.00093	0.00242962	0.00150879	0.0054472	0.155	4.19391
2304.19	15.7	0.51	-0.818	2	0.1	0.213	7.99593	5.99593	0.00242962	0.00150879	0.0054472	0.155	4.19391
2305.28	15.7	0.51	-0.818	2	0.1	0.213	7.99593	5.99593	0.00242962	0.00150879	0.0054472	0.155	4.19391
2306.27	15.7	0.51	-0.818	2	0.1	0.213	7.99593	5.99593	0.00242962	0.00150879	0.0054472	0.155	4.19391
2307.26	15.7	0.51	-0.818	2	0.1	0.213	7.99593	5.99593	0.00242962	0.00150879	0.0054472	0.155	4.19391
2308.24	15.7	0.51	-0.818	2	0.1	0.213	7.99593	5.99593	0.00242962	0.00150879	0.0054472	0.155	4.19391
2309.22	15.7	0.51	-0.818	2	0.1	0.213	7.99593	5.99593	0.00242962	0.00150879	0.0054472	0.155	4.19391
2310.21	15.7	0.51	-0.818	2	0.1	0.213	7.99593	5.99593	0.00242962	0.00150879	0.0054472	0.155	4.19391
2311.2	15.7	0.51	-0.819	1.995	0.1	0.213	7.99593	6.00093	0.00242962	0.00150242	0.00543446	0.155	4.19391
2312.29	15.7	0.51	-0.819	2	0.1	0.213	7.99593	5.99593	0.00242962	0.00150242	0.00543446	0.155	4.19391
2313.27	15.7	0.51	-0.819	1.995	0.1	0.213	7.99593	6.00093	0.00242962	0.00150242	0.00543446	0.155	4.19391
2314.26	15.7	0.51	-0.819	2	0.1	0.213	7.99593	5.99593	0.00242962	0.00150242	0.00543446	0.155	4.19391
2315.24	15.7	0.51	-0.819	1.995	0.1	0.213	7.99593	6.00093	0.00242962	0.00150242	0.00543446	0.155	4.19391
2316.22	15.7	0.51	-0.819	2	0.1	0.213	7.99593	5.99593	0.00242962	0.00150242	0.00543446	0.155	4.19391
2317.21	15.7	0.51	-0.819	2	0.1	0.213	7.99593	5.99593	0.00242962	0.00150242	0.00543446	0.155	4.19391
2318.19	15.7	0.51	-0.819	2	0.1	0.213	7.99593	5.99593	0.00242962	0.00150242	0.00543446	0.155	4.19391
2319.29	15.7	0.51	-0.819	2	0.1	0.213	7.99593	5.99593	0.00242962	0.00150242	0.00543446	0.155	4.19391
2320.27	15.72	0.51	-0.819	2	0.1	0.213	8.00611	6.00611	0.00242962	0.00150242	0.00543446	0.155	4.19391
2321.26	15.7	0.51	-0.819	2	0.1	0.213	7.99593	5.99593	0.00242962	0.00150242	0.00543446	0.155	4.19391
2322.24	15.7	0.512	-0.819	2	0.1	0.213	7.99593	5.99593	0.0024489	0.00150242	0.00545375	0.155	4.19391
2323.22	15.7	0.512	-0.819	2	0.1	0.213	7.99593	5.99593	0.0024489	0.00150242	0.00545375	0.155	4.19391
2324.21	15.7	0.512	-0.819	2	0.1	0.213	7.99593	5.99593	0.0024489	0.00150242	0.00545375	0.155	4.19391
2325.2	15.7	0.512	-0.819	2	0.1	0.213	7.99593	5.99593	0.0024489	0.00150242	0.00545375	0.155	4.19391
2326.29	15.72	0.512	-0.819	2	0.1	0.213	8.00611	6.00611	0.0024489	0.00150242	0.00545375	0.155	4.19391
2327.27	15.7	0.51	-0.819	2	0.1	0.213	7.99593	5.99593	0.00242962	0.00150242	0.00543446	0.155	4.19391
2328.26	15.7	0.512	-0.819	2	0.1	0.213	7.99593	5.99593	0.0024489	0.00150242	0.00545375	0.155	4.19391
2329.24	15.7	0.512	-0.819	2	0.1	0.213	7.99593	5.99593	0.0024489	0.00150242	0.00545375	0.155	4.19391
2330.22	15.72	0.512	-0.819	2	0.1	0.213	8.00611	6.00611	0.0024489	0.00150242	0.00545375	0.155	4.19391
2331.21	15.7	0.512	-0.819	2	0.1	0.213	7.99593	5.99593	0.0024489	0.00150242	0.00545375	0.155	4.19391
2332.19	15.72	0.512	-0.819	2	0.1	0.213	8.00611	6.00611	0.0024489	0.00150242	0.00545375	0.155	4.19391
2333.29	15.7	0.512	-0.819	2	0.1	0.213	7.99593	5.99593	0.0024489	0.00150242	0.00545375	0.155	4.19391
2334.27	15.7	0.512	-0.819	2	0.1	0.213	7.99593	5.99593	0.0024489	0.00150242	0.00545375	0.155	4.19391
2335.25	15.7	0.512	-0.819	2	0.1	0.213	7.99593	5.99593	0.0024489	0.00150242	0.00545375	0.155	4.19391
2336.24	15.72	0.512	-0.819	2	0.1	0.213	8.00611	6.00611	0.0024489	0.00150242	0.00545375	0.155	4.19391
2337.22	15.7	0.512	-0.819	2	0.1	0.213	7.99593	5.99593	0.0024489	0.00150242	0.00545375	0.155	4.19391
2338.21	15.72	0.512	-0.819	2	0.1	0.213	8.00611	6.00611	0.0024489	0.00150242	0.00545375	0.155	4.19391
2339.2	15.7	0.512	-0.819	2	0.1	0.213	7.99593	5.99593	0.0024489	0.00150242	0.00545375	0.155	4.19391
2340.28	15.7	0.512	-0.819	2	0.1	0.213	7.99593	5.99593	0.0024489	0.00150242	0.00545375	0.155	4.19391
2341.27	15.7	0.512	-0.819	2	0.1	0.213	7.99593	5.99593	0.0024489	0.00150242	0.00545375	0.155	4.19391
2342.26	15.72	0.512	-0.819	2	0.1	0.213	8.00611	6.00611	0.0024489	0.00150242	0.00545375	0.155	4.19391
2343.24	15.7	0.512	-0.819	2	0.1	0.213	7.99593	5.99593	0.0024489	0.00150242	0.00545375	0.155	4.19391
2344.23	15.72	0.512	-0.819	2	0.1	0.213	8.00611	6.00611	0.0024489	0.00150242	0.00545375	0.155	4.19391
2345.21	15.72	0.512	-0.819	2	0.1	0.213	8.00611	6.00611	0.0024489	0.00150242	0.00545375	0.155	4.19391
2346.19	15.72	0.512	-0.819	2	0.1	0.213	8.00611	6.00611	0.0024489	0.00150242	0.00545375	0.155	4.19391
2347.28	15.72	0.512	-0.819	2.005	0.1	0.213	8.00611	6.00111	0.0024489	0.00150242	0.00545375	0.155	4.19391
2348.27	15.72	0.512	-0.819	2.005	0.1	0.213	8.00611	6.00111	0.0024489	0.00150242	0.00545375	0.155	4.19391
2349.26	15.72	0.512	-0.819	2	0.1	0.213	8.00611	6.00611	0.0024489	0.00150242	0.00545375	0.155	4.19391
2350.24	15.72	0.512	-0.819	2.005	0.1	0.213	8.00611	6.00111	0.0024489	0.00150242	0.00545375	0.155	4.19391
2351.22	15.72	0.512	-0.819	2	0.1	0.213	8.00611	6.00611	0.0024489	0.00150242	0.00545375	0.155	4.19391
2352.21	15.72	0.512	-0.819	2	0.1	0.213	8.00611	6.00611	0.0024489	0.00150242	0.00545375	0.155	4.19391
2353.19	15.72	0.512	-0.819	2	0.1	0.213	8.00611	6.00611	0.0024489	0.00150242	0.00545375	0.155	4.19391
2354.29	15.72	0.512	-0.819	2	0.1	0.213	8.00611	6.00611	0.0024489	0.00150242	0.00545375	0.155	4.19391
2355.27	15.72	0.512	-0.819	2	0.1	0.213	8.00611	6.00611	0.0024489	0.00150242	0.00545375	0.155	4.19391
2356.26	15.72	0.512	-0.819	2	0.1	0.213	8.00611	6.00611	0.0024489	0.00150242	0.00545375	0.155	4.19391
2357.24	15.72	0.512	-0.819	2	0.1	0.213	8.00611	6.00611	0.0024489	0.00150242	0.00545375	0.155	4.19391
2358.22	15.72	0.512	-0.819	2	0.1	0.213	8.00611	6.00611	0.0024489	0.00150242	0.00545375	0.155	4.19391
2359.21	15.72	0.512	-0.819	2	0.1	0.213	8.00611	6.00611	0.0024489	0.00150242	0.00545375	0.155	4.19391
2360.2	15.72	0.512	-0.819	2	0.1	0.213	8.00611	6.00611	0.0024489	0.00150242	0.00545375	0.155	4.19391
2361.28	15.72	0.512	-0.819	2	0.1	0.213	8.00611	6.00611	0.0024489	0.00150242	0.00545375	0.155	4.19391
2362.27	15.72	0.512	-0.819	2	0.1	0.213	8.00611	6.00611	0.0024489	0.00150242	0.00545375	0.155	4.19391
2363.26	15.7	0.512	-0.819	2	0.1	0.213	7.99593	5.99593	0.0024489	0.00150242	0.00545375	0.155	4.19391
2364.24	15.7	0.512	-0.819	2	0.1	0.213	7.99593	5.99593	0.0024489	0.00150242	0.00545375	0.155	4.19391
2365.22	15.7	0.512	-0.819	2	0.1	0.213	7.99593	5.99593	0.0024489	0.00150242	0.00545375	0.155	4.19391
2366.21	15.72	0.512	-0.819	2	0.1	0.213	8.00611	6.00611	0.0024489	0.00150242	0.00545375	0.155	4.19391
2367.19	15.7	0.512	-0.819	2	0.1	0.213	7.99593	5.99593	0.0024489	0.00150242	0.00545375	0.155	4.19391
2368.29	15.7	0.512	-0.819	2	0.1	0.213	7.99593	5.99593	0.0024489	0.00150242	0.00545375	0.155	4.19391
2369.27	15.7	0.512	-0.819	2	0.1	0.213	7.99593	5.99593	0.0024489	0.00150242	0.00545375	0.155	4.19391
2370.25	15.7	0.512	-0.819	2	0.1	0.213	7.99593	5.99593	0.0024489	0.00150242	0.00545375	0.155	4.19391
2371.24	15.72	0.512	-0.819	2	0.1	0.213	8.00611	6.00611	0.0024489	0.00150242	0.00545375	0.155	4.19391
2372.22	15.7	0.512	-0.819	2	0.1	0.213	7.99593	5.99593	0.0024489	0.00150242	0.00545375	0.155	4.19391
2373.21	15.7	0.512	-0.819	2	0.1	0.213	7.99593	5.99593	0.0024489	0.00150242	0.00545375	0.155	4.19391
2374.19	15.72	0.512	-0.819	2	0.1	0.213	8.00611	6.00611	0.0024489	0.00150242	0.00545375	0.155	4.19391
2375.29	15.7	0.512	-0.819	2	0.1	0.213	7.99593	5.99593	0.0024489	0.00150242	0.00545375	0.155	4.19391
2376.27	15.7	0.512	-0.819	2	0.1	0.213	7.99593	5.99593	0.0024489	0.00150242	0.00545375	0.155	4.19391
2377.26	15.7	0.512	-0.819	2	0.1	0.213	7.99593	5.99593	0.0024489	0.00150242	0.00545375	0.155	4.19391
2378.24	15.7	0.512	-0.819	2	0.1	0.213	7.99593	5.99593	0.0024489	0.00150242	0.00545375	0.155	4.19391
2379.23	15.7	0.512	-0.819	2	0.1	0.213	7.99593	5.99593	0.0024489	0.00150242	0.00545375	0.155	4.19391
2380.21	15.7	0.512	-0.819	2	0.1	0.213	7.99593	5.99593	0.0024489	0.00150242	0.00545375	0.155	4.19391
2381.2	15.7	0.512	-0.819	2	0.1	0.213	7.99593	5.99593	0.0024489	0.00150242	0.00545375	0.155	4.19391
2382.28	15.72	0.512	-0.819	2	0.1	0.213	8.00611	6.00611	0.0024489	0.00150242	0.00545375	0.155	4.19391
2383.27	15.7	0.512	-0.819	2	0.1	0.213	7.99593	5.99593	0.0024489	0.00150242	0.00545375	0.155	4.19391
2384.26	15.7	0.512	-0.819	2	0.1	0.213	7.99593	5.99593	0.0024489	0.00150242	0.00545375	0.155	4.19391
2385.24	15.7	0.512	-0.819	2.015	0.1	0.213	7.99593	5.98093	0.0024489	0.00150242	0.00545375	0.155	4.19391
2386.22	15.72	0.512	-0.819	2.06	0.1	0.213	8.00611	5.94611	0.0024489	0.00150242	0.00545375	0.155	4.19391
2387.21	15.7	0.512	-0.818	2.07	0.1	0.213	7.99593	5.92593	0.0024489	0.00150879	0.00546648	0.155	4.19391
2388.19	15.72	0.512	-0.818	2.11	0.1	0.213	8.00611	5.89611	0.0024489	0.00150879	0.00546648	0.155	4.19391
2389.29	15.7	0.512	-0.817	2.18	0.1	0.213	7.99593	5.81593	0.0024489	0.00151516	0.00547921	0.15	4.05862
2390.27	15.72	0.512	-0.817	2.245	0.1	0.213	8.00611	5.76111	0.0024489	0.00151516	0.00547921	0.15	4.05862
2391.25	15.72	0.512	-0.816	2.305	0.1	0.213	8.00611	5.70111	0.0024489	0.00152152	0.00549194	0.15	4.05862
2392.24	15.72	0.512	-0.815	2.36	0.1	0.213	8.00611	5.64611	0.0024489	0.00152789	0.00550468	0.145	3.92333
2393.22	15.7	0.512	-0.814	2.415	0.1	0.213	7.99593	5.58093	0.0024489	0.00153425	0.00551741	0.14	3.78805
2394.21	15.7	0.512	-0.813	2.465	0.1	0.213	7.99593	5.53093	0.0024489	0.00154062	0.00553014	0.14	3.78805
2395.2	15.7	0.512	-0.812	2.52	0.1	0.213	7.99593	5.47593	0.0024489	0.00154699	0.00554287	0.135	3.65276
2396.28	15.74	0.512	-0.811	2.585	0.1	0.213	8.0163	5.4313	0.0024489	0.00155335	0.00555561	0.135	3.65276
2397.27	15.72	0.512	-0.811	2.625	0.1	0.213	8.00611	5.38111	0.0024489	0.00155335	0.00555561	0.13	3.51747
2398.26	15.72	0.512	-0.81	2.67	0.1	0.213	8.00611	5.33611	0.0024489	0.00155972	0.00556834	0.13	3.51747
2399.24	15.72	0.512	-0.81	2.71	0.1	0.213	8.00611	5.29611	0.0024489	0.00155972	0.00556834	0.125	3.38218
2400.22	15.72	0.514	-0.809	2.765	0.1	0.213	8.00611	5.24111	0.00246818	0.00156608	0.00560035	0.125	3.38218
2401.21	15.7	0.514	-0.808	2.81	0.1	0.213	7.99593	5.18593	0.00246818	0.00157245	0.00561309	0.12	3.2469
2402.19	15.7	0.514	-0.808	2.865	0.1	0.213	7.99593	5.13093	0.00246818	0.00157245	0.00561309	0.12	3.2469
2403.29	15.7	0.512	-0.807	2.915	0.1	0.213	7.99593	5.08093	0.0024489	0.00157882	0.00560653	0.12	3.2469
2404.27	15.7	0.514	-0.807	2.96	0.1	0.213	7.99593	5.03593	0.00246818	0.00157882	0.00562582	0.115	3.11161
2405.26	15.7	0.512	-0.806	3.01	0.1	0.213	7.99593	4.98593	0.0024489	0.00158518	0.00561927	0.115	3.11161
2406.24	15.7	0.512	-0.805	3.06	0.1	0.213	7.99593	4.93593	0.0024489	0.00159155	0.005632	0.115	3.11161
2407.22	15.7	0.514	-0.805	3.11	0.1	0.213	7.99593	4.88593	0.00246818	0.00159155	0.00565128	0.11	2.97632
2408.21	15.7	0.514	-0.804	3.16	0.1	0.213	7.99593	4.83593	0.00246818	0.00159792	0.00566401	0.11	2.97632
2409.19	15.7	0.512	-0.803	3.21	0.1	0.213	7.99593	4.78593	0.0024489	0.00160428	0.00565746	0.11	2.97632
2410.28	15.7	0.512	-0.802	3.265	0.1	0.213	7.99593	4.73093	0.0024489	0.00161065	0.0056702	0.105	2.84103
2411.27	15.7	0.514	-0.802	3.31	0.1	0.213	7.99593	4.68593	0.00246818	0.00161065	0.00568948	0.105	2.84103
2412.26	15.72	0.514	-0.801	3.37	0.1	0.213	8.00611	4.63611	0.00246818	0.00161701	0.00570221	0.105	2.84103
2413.24	15.7	0.514	-0.8	3.415	0.1	0.213	7.99593	4.58093	0.00246818	0.00162338	0.00571494	0.1	2.70575
2414.22	15.7	0.514	-0.799	3.465	0.1	0.213	7.99593	4.53093	0.00246818	0.00162975	0.00572768	0.1	2.70575
2415.21	15.7	0.514	-0.799	3.505	0.1	0.213	7.99593	4.49093	0.00246818	0.00162975	0.00572768	0.1	2.70575
2416.2	15.7	0.514	-0.798	3.56	0.1	0.213	7.99593	4.43593	0.00246818	0.00163611	0.00574041	0.1	2.70575
2417.29	15.7	0.514	-0.797	3.62	0.1	0.213	7.99593	4.37593	0.00246818	0.00164248	0.00575314	0.095	2.57046
2418.27	15.72	0.514	-0.796	3.665	0.1	0.213	8.00611	4.34111	0.00246818	0.00164885	0.00576587	0.095	2.57046
2419.25	15.7	0.514	-0.796	3.715	0.1	0.213	7.99593	4.28093	0.00246818	0.00164885	0.00576587	0.095	2.57046
2420.24	15.72	0.514	-0.795	3.765	0.1	0.213	8.00611	4.24111	0.00246818	0.00165521	0.00577861	0.09	2.43517
2421.22	15.7	0.514	-0.794	3.815	0.1	0.213	7.99593	4.18093	0.00246818	0.00166158	0.00579134	0.09	2.43517
2422.21	15.74	0.514	-0.793	3.865	0.1	0.213	8.0163	4.1513	0.00246818	0.00166794	0.00580407	0.09	2.43517
2423.19	15.74	0.514	-0.792	3.91	0.1	0.213	8.0163	4.1063	0.00246818	0.00167431	0.0058168	0.085	2.29988
2424.28	15.72	0.514	-0.791	3.97	0.1	0.213	8.00611	4.03611	0.00246818	0.00168068	0.00582954	0.085	2.29988
2425.27	15.72	0.514	-0.791	4.01	0.1	0.213	8.00611	3.99611	0.00246818	0.00168068	0.00582954	0.085	2.29988
2426.26	15.72	0.514	-0.79	4.065	0.1	0.213	8.00611	3.94111	0.00246818	0.00168704	0.00584227	0.085	2.29988
2427.24	15.72	0.514	-0.789	4.11	0.1	0.213	8.00611	3.89611	0.00246818	0.00169341	0.005855	0.08	2.1646
2428.22	15.72	0.514	-0.788	4.165	0.1	0.213	8.00611	3.84111	0.00246818	0.00169977	0.00586773	0.08	2.1646
2429.21	15.7	0.514	-0.787	4.205	0.1	0.213	7.99593	3.79093	0.00246818	0.00170614	0.00588047	0.08	2.1646
2430.19	15.68	0.514	-0.786	4.255	0.1	0.213	7.98574	3.73074	0.00246818	0.00171251	0.0058932	0.08	2.1646
2431.29	15.7	0.514	-0.785	4.32	0.1	0.213	7.99593	3.67593	0.00246818	0.00171887	0.00590593	0.075	2.02931
2432.27	15.7	0.514	-0.784	4.37	0.1	0.213	7.99593	3.62593	0.00246818	0.00172524	0.00591866	0.075	2.02931
2433.26	15.7	0.515	-0.783	4.415	0.1	0.213	7.99593	3.58093	0.00247782	0.00173161	0.00594104	0.075	2.02931
2434.24	15.7	0.515	-0.783	4.455	0.1	0.213	7.99593	3.54093	0.00247782	0.00173161	0.00594104	0.075	2.02931
2435.22	15.7	0.515	-0.782	4.51	0.1	0.213	7.99593	3.48593	0.00247782	0.00173797	0.00595377	0.075	2.02931
2436.21	15.7	0.515	-0.781	4.56	0.1	0.213	7.99593	3.43593	0.00247782	0.00174434	0.0059665	0.07	1.89402
2437.19	15.7	0.515	-0.78	4.615	0.1	0.213	7.99593	3.38093	0.00247782	0.0017507	0.00597923	0.07	1.89402
2438.29	15.74	0.515	-0.779	4.665	0.1	0.213	8.0163	3.3513	0.00247782	0.00175707	0.00599197	0.07	1.89402
2439.27	15.72	0.515	-0.778	4.72	0.1	0.213	8.00611	3.28611	0.00247782	0.00176344	0.0060047	0.07	1.89402
2440.25	15.7	0.515	-0.777	4.765	0.1	0.213	7.99593	3.23093	0.00247782	0.0017698	0.00601743	0.07	1.89402
2441.24	15.7	0.515	-0.776	4.805	0.1	0.213	7.99593	3.19093	0.00247782	0.00177617	0.00603016	0.065	1.75874
2442.22	15.7	0.515	-0.775	4.86	0.1	0.213	7.99593	3.13593	0.00247782	0.00178254	0.0060429	0.065	1.75874
2443.21	15.7	0.515	-0.774	4.91	0.1	0.213	7.99593	3.08593	0.00247782	0.0017889	0.00605563	0.065	1.75874
2444.19	15.72	0.515	-0.773	4.96	0.1	0.213	8.00611	3.04611	0.00247782	0.00179527	0.00606836	0.065	1.75874
2445.28	15.7	0.515	-0.772	5.015	0.1	0.213	7.99593	2.98093	0.00247782	0.00180163	0.00608109	0.065	1.75874
2446.27	15.7	0.515	-0.772	5.06	0.1	0.213	7.99593	2.93593	0.00247782	0.00180163	0.00608109	0.065	1.75874
2447.25	15.7	0.515	-0.771	5.11	0.1	0.213	7.99593	2.88593	0.00247782	0.001808	0.00609383	0.065	1.75874
2448.24	15.7	0.517	-0.77	5.16	0.1	0.213	7.99593	2.83593	0.00249711	0.00181437	0.00612584	0.065	1.75874
2449.23	15.7	0.517	-0.769	5.215	0.1	0.213	7.99593	2.78093	0.00249711	0.00182073	0.00613857	0.065	1.75874
2450.21	15.74	0.517	-0.768	5.26	0.1	0.213	8.0163	2.7563	0.00249711	0.0018271	0.00615131	0.06	1.62345
2451.2	15.7	0.517	-0.767	5.31	0.1	0.213	7.99593	2.68593	0.00249711	0.00183346	0.00616404	0.06	1.62345
2452.28	15.7	0.517	-0.766	5.37	0.1	0.213	7.99593	2.62593	0.00249711	0.00183983	0.00617677	0.06	1.62345
2453.27	15.7	0.517	-0.765	5.415	0.1	0.213	7.99593	2.58093	0.00249711	0.0018462	0.0061895	0.06	1.62345
2454.25	15.7	0.517	-0.764	5.465	0.1	0.213	7.99593	2.53093	0.00249711	0.00185256	0.00620223	0.06	1.62345
2455.24	15.7	0.517	-0.763	5.505	0.1	0.213	7.99593	2.49093	0.00249711	0.00185893	0.00621497	0.06	1.62345
2456.22	15.7	0.517	-0.762	5.555	0.1	0.213	7.99593	2.44093	0.00249711	0.0018653	0.0062277	0.06	1.62345
2457.21	15.7	0.519	-0.761	5.61	0.1	0.213	7.99593	2.38593	0.00251639	0.00187166	0.00625971	0.06	1.62345
2458.19	15.74	0.519	-0.76	5.665	0.1	0.213	8.0163	2.3513	0.00251639	0.00187803	0.00627245	0.06	1.62345
2459.29	15.72	0.519	-0.759	5.715	0.1	0.213	8.00611	2.29111	0.00251639	0.00188439	0.00628518	0.06	1.62345
2460.27	15.7	0.519	-0.758	5.765	0.1	0.213	7.99593	2.23093	0.00251639	0.00189076	0.00629791	0.055	1.48816
2461.26	15.7	0.519	-0.757	5.815	0.1	0.213	7.99593	2.18093	0.00251639	0.00189713	0.00631064	0.06	1.62345
2462.24	15.7	0.519	-0.756	5.86	0.1	0.213	7.99593	2.13593	0.00251639	0.00190349	0.00632338	0.055	1.48816
2463.22	15.7	0.519	-0.755	5.92	0.1	0.213	7.99593	2.07593	0.00251639	0.00190986	0.00633611	0.055	1.48816
2464.21	15.74	0.519	-0.754	5.96	0.1	0.213	8.0163	2.0563	0.00251639	0.00191623	0.00634884	0.055	1.48816
2465.2	15.7	0.519	-0.753	6.01	0.1	0.213	7.99593	1.98593	0.00251639	0.00192259	0.00636157	0.055	1.48816
2466.29	15.7	0.519	-0.752	6.065	0.1	0.213	7.99593	1.93093	0.00251639	0.00192896	0.00637431	0.055	1.48816
2467.27	15.7	0.519	-0.752	6.115	0.1	0.213	7.99593	1.88093	0.00251639	0.00192896	0.00637431	0.055	1.48816
2468.26	15.72	0.52	-0.751	6.165	0.1	0.213	8.00611	1.84111	0.00252603	0.00193532	0.00639668	0.055	1.48816
2469.24	15.7	0.52	-0.75	6.215	0.1	0.213	7.99593	1.78093	0.00252603	0.00194169	0.00640941	0.055	1.48816
2470.22	15.7	0.519	-0.749	6.26	0.1	0.213	7.99593	1.73593	0.00251639	0.00194806	0.0064125	0.055	1.48816
2471.21	15.68	0.519	-0.748	6.305	0.1	0.213	7.98574	1.68074	0.00251639	0.00195442	0.00642524	0.055	1.48816
2472.19	15.68	0.519	-0.747	6.36	0.1	0.213	7.98574	1.62574	0.00251639	0.00196079	0.00643797	0.055	1.48816
2473.29	15.7	0.52	-0.746	6.42	0.1	0.213	7.99593	1.57593	0.00252603	0.00196716	0.00646034	0.055	1.48816
2474.27	15.72	0.52	-0.745	6.46	0.1	0.213	8.00611	1.54611	0.00252603	0.00197352	0.00647307	0.055	1.48816
2475.25	15.7	0.52	-0.744	6.515	0.1	0.213	7.99593	1.48093	0.00252603	0.00197989	0.00648581	0.055	1.48816
2476.24	15.72	0.52	-0.743	6.56	0.1	0.213	8.00611	1.44611	0.00252603	0.00198625	0.00649854	0.055	1.48816
2477.22	15.7	0.52	-0.742	6.61	0.1	0.213	7.99593	1.38593	0.00252603	0.00199262	0.00651127	0.055	1.48816
2478.21	15.74	0.522	-0.741	6.665	0.1	0.213	8.0163	1.3513	0.00254531	0.00199899	0.00654329	0.055	1.48816
2479.19	15.72	0.522	-0.74	6.715	0.1	0.213	8.00611	1.29111	0.00254531	0.00200535	0.00655602	0.055	1.48816
2480.29	15.7	0.522	-0.74	6.76	0.1	0.213	7.99593	1.23593	0.00254531	0.00200535	0.00655602	0.055	1.48816
2481.27	15.7	0.522	-0.739	6.82	0.1	0.213	7.99593	1.17593	0.00254531	0.00201172	0.00656875	0.055	1.48816
2482.26	15.7	0.522	-0.738	6.87	0.1	0.213	7.99593	1.12593	0.00254531	0.00201808	0.00658148	0.05	1.35287
2483.24	15.7	0.522	-0.737	6.915	0.1	0.213	7.99593	1.08093	0.00254531	0.00202445	0.00659422	0.055	1.48816
2484.23	15.72	0.522	-0.736	6.965	0.1	0.213	8.00611	1.04111	0.00254531	0.00203082	0.00660695	0.055	1.48816
2485.21	15.7	0.522	-0.735	7.01	0.1	0.213	7.99593	0.985926	0.00254531	0.00203718	0.00661968	0.05	1.35287
2486.2	15.72	0.522	-0.734	7.06	0.1	0.213	8.00611	0.946112	0.00254531	0.00204355	0.00663241	0.05	1.35287
2487.28	15.7	0.524	-0.733	7.12	0.1	0.213	7.99593	0.875926	0.0025646	0.00204992	0.00666443	0.05	1.35287
2488.27	15.72	0.524	-0.732	7.16	0.1	0.213	8.00611	0.846112	0.0025646	0.00205628	0.00667716	0.05	1.35287
2489.26	15.7	0.524	-0.731	7.215	0.1	0.213	7.99593	0.780926	0.0025646	0.00206265	0.00668989	0.05	1.35287
2490.24	15.7	0.524	-0.731	7.255	0.1	0.213	7.99593	0.740926	0.0025646	0.00206265	0.00668989	0.05	1.35287
2491.22	15.7	0.524	-0.729	7.315	0.1	0.213	7.99593	0.680926	0.0025646	0.00207538	0.00671536	0.05	1.35287
2492.21	15.7	0.524	-0.729	7.36	0.1	0.213	7.99593	0.635926	0.0025646	0.00207538	0.00671536	0.05	1.35287
2493.19	15.7	0.524	-0.728	7.41	0.1	0.213	7.99593	0.585926	0.0025646	0.00208175	0.00672809	0.05	1.35287
[truncated: 6,030 more rows]
