# Supplementary material for: Study on Deformation and Permeation Properties of Gas-Containing Fractured Rock
Source: Hindawi journal article supplement (doi:10.1155/2019/1967080), 2019-06-25
Supplement: f1 [file 1967080.f1.zip › Sample j3.xls]

## Sheet: sample j3
test number	j3-2.0-0.2
test data	2017-10-24
tester	y
specimen gauge length (mm)	102.82
diameter	50
area (mm^2)	1963.5
maximum force (kN)	43.2
compressive strength (MPa)	22
yield(kN):	42.82
yield strength(MPa):	21.81
poisson's ratio	1.09
remarks:	liexiyanti
Time(s)	axial force (kN)	displacement (mm)	radial deformation	confining pressure (MPa)	inlet pressure (MPa)	outlet pressure (MPa)	flow rate	axial stress (MPa)	deviatoric stress (MPa)	axial strain	radial strain	volumetric strain	permeability (mD)
1161.53	3.92	0.203	-0.989	2	0.1	0.213	0.35	1.99643	0	0	0	0	9.38794
1162.62	3.94	0.203	-0.989	2	0.1	0.213	0.35	2.00662	0.00662083	0	0	0	9.38794
1163.61	3.96	0.203	-0.989	2	0.1	0.213	0.35	2.01681	0.0168067	0	0	0	9.38794
1164.59	4.02	0.204	-0.989	2	0.1	0.213	0.35	2.04736	0.0473644	9.72573e-06	0	9.72573e-06	9.38794
1165.58	4.08	0.204	-0.989	2	0.1	0.213	0.345	2.07792	0.0779221	9.72573e-06	0	9.72573e-06	9.25383
1166.56	4.12	0.206	-0.989	2	0.1	0.213	0.345	2.09829	0.0982939	2.91772e-05	0	2.91772e-05	9.25383
1167.55	4.2	0.207	-0.989	2	0.1	0.213	0.345	2.13904	0.139037	3.89029e-05	0	3.89029e-05	9.25383
1168.53	4.24	0.209	-0.989	2	0.1	0.213	0.345	2.15941	0.159409	5.83544e-05	0	5.83544e-05	9.25383
1169.62	4.32	0.212	-0.989	2	0.1	0.213	0.345	2.20015	0.200153	8.75316e-05	0	8.75316e-05	9.25383
1170.61	4.38	0.213	-0.989	2	0.1	0.213	0.345	2.23071	0.23071	9.72573e-05	0	9.72573e-05	9.25383
1171.59	4.42	0.215	-0.989	2	0.1	0.213	0.34	2.25108	0.251082	0.000116709	0	0.000116709	9.11971
1172.58	4.48	0.216	-0.989	2	0.1	0.213	0.34	2.28164	0.28164	0.000126435	0	0.000126435	9.11971
1173.56	4.52	0.219	-0.989	2	0.1	0.213	0.335	2.30201	0.302012	0.000155612	0	0.000155612	8.9856
1174.55	4.58	0.219	-0.989	2	0.1	0.213	0.335	2.33257	0.332569	0.000155612	0	0.000155612	8.9856
1175.53	4.62	0.222	-0.989	2	0.1	0.213	0.335	2.35294	0.352941	0.000184789	0	0.000184789	8.9856
1176.62	4.68	0.224	-0.989	2	0.1	0.213	0.335	2.3835	0.383499	0.00020424	0	0.00020424	8.9856
1177.61	4.74	0.226	-0.989	2	0.1	0.213	0.33	2.41406	0.414057	0.000223692	0	0.000223692	8.85149
1178.59	4.78	0.228	-0.989	2	0.1	0.213	0.33	2.43443	0.434428	0.000243143	0	0.000243143	8.85149
1179.58	4.84	0.229	-0.989	2	0.1	0.213	0.33	2.46499	0.464986	0.000252869	0	0.000252869	8.85149
1180.56	4.9	0.231	-0.99	2	0.1	0.213	0.325	2.49554	0.495544	0.000272321	-6.3662e-06	0.000259588	8.71737
1181.55	4.94	0.234	-0.99	2	0.1	0.213	0.325	2.51592	0.515915	0.000301498	-6.3662e-06	0.000288765	8.71737
1182.53	5	0.237	-0.99	2	0.1	0.213	0.325	2.54647	0.546473	0.000330675	-6.3662e-06	0.000317943	8.71737
1183.62	5.06	0.238	-0.99	2	0.1	0.213	0.32	2.57703	0.577031	0.000340401	-6.3662e-06	0.000327668	8.58326
1184.61	5.1	0.241	-0.99	2	0.1	0.213	0.32	2.5974	0.597403	0.000369578	-6.3662e-06	0.000356846	8.58326
1185.59	5.16	0.243	-0.99	2	0.1	0.213	0.32	2.62796	0.62796	0.000389029	-6.3662e-06	0.000376297	8.58326
1186.58	5.2	0.244	-0.99	2	0.1	0.213	0.315	2.64833	0.648332	0.000398755	-6.3662e-06	0.000386023	8.44914
1187.56	5.26	0.247	-0.99	2	0.1	0.213	0.315	2.67889	0.67889	0.000427932	-6.3662e-06	0.0004152	8.44914
1188.55	5.3	0.248	-0.99	2	0.1	0.213	0.31	2.69926	0.699262	0.000437658	-6.3662e-06	0.000424926	8.31503
1189.53	5.36	0.25	-0.99	2	0.1	0.213	0.31	2.72982	0.729819	0.00045711	-6.3662e-06	0.000444377	8.31503
1190.62	5.42	0.253	-0.99	2	0.1	0.213	0.31	2.76038	0.760377	0.000486287	-6.3662e-06	0.000473554	8.31503
1191.61	5.46	0.254	-0.99	2	0.1	0.213	0.31	2.78075	0.780749	0.000496012	-6.3662e-06	0.00048328	8.31503
1192.6	5.52	0.257	-0.99	2	0.1	0.213	0.305	2.81131	0.811306	0.00052519	-6.3662e-06	0.000512457	8.18092
1193.58	5.58	0.259	-0.99	2	0.1	0.213	0.305	2.84186	0.841864	0.000544641	-6.3662e-06	0.000531909	8.18092
1194.56	5.62	0.262	-0.99	2	0.1	0.213	0.305	2.86224	0.862236	0.000573818	-6.3662e-06	0.000561086	8.18092
1195.55	5.66	0.262	-0.99	2	0.1	0.213	0.3	2.88261	0.882608	0.000573818	-6.3662e-06	0.000561086	8.0468
1196.53	5.72	0.265	-0.99	2	0.1	0.213	0.3	2.91317	0.913165	0.000602996	-6.3662e-06	0.000590263	8.0468
1197.62	5.76	0.266	-0.99	2	0.1	0.213	0.3	2.93354	0.933537	0.000612721	-6.3662e-06	0.000599989	8.0468
1198.61	5.8	0.268	-0.991	2	0.1	0.213	0.3	2.95391	0.953909	0.000632173	-1.27324e-05	0.000606708	8.0468
1199.59	5.84	0.269	-0.991	2	0.1	0.213	0.295	2.97428	0.974281	0.000641898	-1.27324e-05	0.000616434	7.91269
1200.58	5.9	0.272	-0.991	2	0.1	0.213	0.295	3.00484	1.00484	0.000671076	-1.27324e-05	0.000645611	7.91269
1201.56	5.94	0.273	-0.991	2	0.1	0.213	0.295	3.02521	1.02521	0.000680801	-1.27324e-05	0.000655337	7.91269
1202.54	6	0.275	-0.991	2	0.1	0.213	0.29	3.05577	1.05577	0.000700253	-1.27324e-05	0.000674788	7.77858
1203.53	6.06	0.278	-0.991	2	0.1	0.213	0.29	3.08633	1.08633	0.00072943	-1.27324e-05	0.000703965	7.77858
1204.62	6.1	0.279	-0.991	2	0.1	0.213	0.29	3.1067	1.1067	0.000739156	-1.27324e-05	0.000713691	7.77858
1205.61	6.16	0.282	-0.991	2	0.1	0.213	0.285	3.13725	1.13725	0.000768333	-1.27324e-05	0.000742868	7.64446
1206.59	6.22	0.284	-0.991	2	0.1	0.213	0.285	3.16781	1.16781	0.000787784	-1.27324e-05	0.00076232	7.64446
1207.58	6.28	0.287	-0.991	2	0.1	0.213	0.285	3.19837	1.19837	0.000816962	-1.27324e-05	0.000791497	7.64446
1208.56	6.32	0.288	-0.991	2	0.1	0.213	0.28	3.21874	1.21874	0.000826687	-1.27324e-05	0.000801223	7.51035
1209.55	6.38	0.29	-0.991	2	0.1	0.213	0.28	3.2493	1.2493	0.000846139	-1.27324e-05	0.000820674	7.51035
1210.53	6.42	0.291	-0.992	2	0.1	0.213	0.28	3.26967	1.26967	0.000855865	-1.90986e-05	0.000817667	7.51035
1211.62	6.48	0.293	-0.992	2	0.1	0.213	0.275	3.30023	1.30023	0.000875316	-1.90986e-05	0.000837119	7.37624
1212.61	6.52	0.294	-0.992	2	0.1	0.213	0.275	3.3206	1.3206	0.000885042	-1.90986e-05	0.000846845	7.37624
1213.59	6.56	0.297	-0.992	2	0.1	0.213	0.275	3.34097	1.34097	0.000914219	-1.90986e-05	0.000876022	7.37624
1214.58	6.6	0.298	-0.992	2	0.1	0.213	0.27	3.36134	1.36134	0.000923945	-1.90986e-05	0.000885748	7.24212
1215.56	6.66	0.3	-0.992	2	0.1	0.213	0.27	3.3919	1.3919	0.000943396	-1.90986e-05	0.000905199	7.24212
1216.55	6.7	0.301	-0.992	2	0.1	0.213	0.27	3.41227	1.41227	0.000953122	-1.90986e-05	0.000914925	7.24212
1217.53	6.74	0.304	-0.992	2	0.1	0.213	0.27	3.43265	1.43265	0.000982299	-1.90986e-05	0.000944102	7.24212
1218.62	6.8	0.306	-0.992	2	0.1	0.213	0.265	3.4632	1.4632	0.00100175	-1.90986e-05	0.000963553	7.10801
1219.61	6.86	0.307	-0.992	2	0.1	0.213	0.265	3.49376	1.49376	0.00101148	-1.90986e-05	0.000973279	7.10801
1220.59	6.9	0.309	-0.993	2	0.1	0.213	0.265	3.51413	1.51413	0.00103093	-2.54648e-05	0.000979998	7.10801
1221.58	6.94	0.31	-0.993	2	0.1	0.213	0.265	3.5345	1.5345	0.00104065	-2.54648e-05	0.000989724	7.10801
1222.56	7	0.312	-0.993	2	0.1	0.213	0.26	3.56506	1.56506	0.00106011	-2.54648e-05	0.00100918	6.9739
1223.55	7.04	0.315	-0.993	2	0.1	0.213	0.26	3.58543	1.58543	0.00108928	-2.54648e-05	0.00103835	6.9739
1224.53	7.08	0.316	-0.993	2	0.1	0.213	0.26	3.60581	1.60581	0.00109901	-2.54648e-05	0.00104808	6.9739
1225.62	7.14	0.317	-0.993	2	0.1	0.213	0.26	3.63636	1.63636	0.00110873	-2.54648e-05	0.0010578	6.9739
1226.61	7.2	0.319	-0.993	2	0.1	0.213	0.255	3.66692	1.66692	0.00112819	-2.54648e-05	0.00107726	6.83978
1227.59	7.26	0.322	-0.993	2	0.1	0.213	0.255	3.69748	1.69748	0.00115736	-2.54648e-05	0.00110643	6.83978
1228.58	7.3	0.323	-0.993	2	0.1	0.213	0.255	3.71785	1.71785	0.00116709	-2.54648e-05	0.00111616	6.83978
1229.56	7.36	0.325	-0.994	2	0.1	0.213	0.255	3.74841	1.74841	0.00118654	-3.1831e-05	0.00112288	6.83978
1230.55	7.4	0.326	-0.994	2	0.1	0.213	0.25	3.76878	1.76878	0.00119627	-3.1831e-05	0.0011326	6.70567
1231.53	7.46	0.329	-0.994	2	0.1	0.213	0.25	3.79934	1.79934	0.00122544	-3.1831e-05	0.00116178	6.70567
1232.62	7.52	0.331	-0.994	2	0.1	0.213	0.25	3.8299	1.8299	0.00124489	-3.1831e-05	0.00118123	6.70567
1233.61	7.56	0.332	-0.994	2	0.1	0.213	0.25	3.85027	1.85027	0.00125462	-3.1831e-05	0.00119096	6.70567
1234.59	7.6	0.334	-0.994	2	0.1	0.213	0.245	3.87064	1.87064	0.00127407	-3.1831e-05	0.00121041	6.57156
1235.58	7.66	0.335	-0.994	2	0.1	0.213	0.245	3.9012	1.9012	0.0012838	-3.1831e-05	0.00122013	6.57156
1236.56	7.68	0.337	-0.994	2	0.1	0.213	0.245	3.91138	1.91138	0.00130325	-3.1831e-05	0.00123959	6.57156
1237.55	7.7	0.338	-0.995	2	0.1	0.213	0.245	3.92157	1.92157	0.00131297	-3.81972e-05	0.00123658	6.57156
1238.53	7.7	0.338	-0.995	2	0.1	0.213	0.245	3.92157	1.92157	0.00131297	-3.81972e-05	0.00123658	6.57156
1239.62	7.72	0.339	-0.995	2	0.1	0.213	0.245	3.93175	1.93175	0.0013227	-3.81972e-05	0.00124631	6.57156
1240.61	7.72	0.339	-0.995	2	0.1	0.213	0.24	3.93175	1.93175	0.0013227	-3.81972e-05	0.00124631	6.43744
1241.59	7.72	0.339	-0.995	2	0.1	0.213	0.24	3.93175	1.93175	0.0013227	-3.81972e-05	0.00124631	6.43744
1242.58	7.74	0.341	-0.995	2	0.1	0.213	0.24	3.94194	1.94194	0.00134215	-3.81972e-05	0.00126576	6.43744
1243.56	7.74	0.341	-0.995	2	0.1	0.213	0.24	3.94194	1.94194	0.00134215	-3.81972e-05	0.00126576	6.43744
1244.55	7.74	0.341	-0.995	2	0.1	0.213	0.24	3.94194	1.94194	0.00134215	-3.81972e-05	0.00126576	6.43744
1245.53	7.76	0.341	-0.995	2	0.1	0.213	0.24	3.95213	1.95213	0.00134215	-3.81972e-05	0.00126576	6.43744
1246.62	7.76	0.341	-0.995	2	0.1	0.213	0.24	3.95213	1.95213	0.00134215	-3.81972e-05	0.00126576	6.43744
1247.61	7.76	0.341	-0.995	2	0.1	0.213	0.24	3.95213	1.95213	0.00134215	-3.81972e-05	0.00126576	6.43744
1248.59	7.76	0.341	-0.995	2	0.1	0.213	0.24	3.95213	1.95213	0.00134215	-3.81972e-05	0.00126576	6.43744
1249.58	7.76	0.342	-0.995	2	0.1	0.213	0.24	3.95213	1.95213	0.00135188	-3.81972e-05	0.00127548	6.43744
1250.56	7.76	0.342	-0.995	2	0.1	0.213	0.24	3.95213	1.95213	0.00135188	-3.81972e-05	0.00127548	6.43744
1251.55	7.76	0.342	-0.995	2	0.1	0.213	0.24	3.95213	1.95213	0.00135188	-3.81972e-05	0.00127548	6.43744
1252.53	7.76	0.342	-0.995	2	0.1	0.213	0.24	3.95213	1.95213	0.00135188	-3.81972e-05	0.00127548	6.43744
1253.62	7.78	0.342	-0.995	2	0.1	0.213	0.24	3.96231	1.96231	0.00135188	-3.81972e-05	0.00127548	6.43744
1254.61	7.78	0.344	-0.995	2	0.1	0.213	0.24	3.96231	1.96231	0.00137133	-3.81972e-05	0.00129493	6.43744
1255.59	7.78	0.344	-0.994	2.005	0.1	0.213	0.235	3.96231	1.95731	0.00137133	-3.1831e-05	0.00130767	6.30333
1256.58	7.78	0.344	-0.994	2.005	0.1	0.213	0.235	3.96231	1.95731	0.00137133	-3.1831e-05	0.00130767	6.30333
1257.56	7.78	0.344	-0.994	2.005	0.1	0.213	0.235	3.96231	1.95731	0.00137133	-3.1831e-05	0.00130767	6.30333
1258.54	7.78	0.344	-0.994	2	0.1	0.213	0.235	3.96231	1.96231	0.00137133	-3.1831e-05	0.00130767	6.30333
1259.53	7.8	0.344	-0.994	2	0.1	0.213	0.235	3.9725	1.9725	0.00137133	-3.1831e-05	0.00130767	6.30333
1260.62	7.8	0.344	-0.994	2	0.1	0.213	0.235	3.9725	1.9725	0.00137133	-3.1831e-05	0.00130767	6.30333
1261.61	7.8	0.344	-0.994	2	0.1	0.213	0.235	3.9725	1.9725	0.00137133	-3.1831e-05	0.00130767	6.30333
1262.6	7.8	0.345	-0.994	2	0.1	0.213	0.235	3.9725	1.9725	0.00138105	-3.1831e-05	0.00131739	6.30333
1263.58	7.8	0.344	-0.994	2	0.1	0.213	0.235	3.9725	1.9725	0.00137133	-3.1831e-05	0.00130767	6.30333
1264.56	7.8	0.345	-0.994	2	0.1	0.213	0.235	3.9725	1.9725	0.00138105	-3.1831e-05	0.00131739	6.30333
1265.55	7.8	0.345	-0.994	2	0.1	0.213	0.235	3.9725	1.9725	0.00138105	-3.1831e-05	0.00131739	6.30333
1266.53	7.82	0.345	-0.994	2	0.1	0.213	0.235	3.98268	1.98268	0.00138105	-3.1831e-05	0.00131739	6.30333
1267.62	7.82	0.345	-0.994	2	0.1	0.213	0.235	3.98268	1.98268	0.00138105	-3.1831e-05	0.00131739	6.30333
1268.61	7.82	0.345	-0.994	2	0.1	0.213	0.235	3.98268	1.98268	0.00138105	-3.1831e-05	0.00131739	6.30333
1269.59	7.82	0.345	-0.994	2	0.1	0.213	0.235	3.98268	1.98268	0.00138105	-3.1831e-05	0.00131739	6.30333
1270.58	7.82	0.345	-0.994	2	0.1	0.213	0.235	3.98268	1.98268	0.00138105	-3.1831e-05	0.00131739	6.30333
1271.56	7.84	0.347	-0.994	2	0.1	0.213	0.235	3.99287	1.99287	0.00140051	-3.1831e-05	0.00133684	6.30333
1272.55	7.84	0.345	-0.994	2	0.1	0.213	0.235	3.99287	1.99287	0.00138105	-3.1831e-05	0.00131739	6.30333
1273.53	7.84	0.347	-0.994	2	0.1	0.213	0.235	3.99287	1.99287	0.00140051	-3.1831e-05	0.00133684	6.30333
1274.62	7.84	0.347	-0.994	2	0.1	0.213	0.235	3.99287	1.99287	0.00140051	-3.1831e-05	0.00133684	6.30333
1275.61	7.84	0.347	-0.994	2	0.1	0.213	0.235	3.99287	1.99287	0.00140051	-3.1831e-05	0.00133684	6.30333
1276.59	7.84	0.347	-0.994	2	0.1	0.213	0.235	3.99287	1.99287	0.00140051	-3.1831e-05	0.00133684	6.30333
1277.58	7.84	0.347	-0.994	2	0.1	0.213	0.235	3.99287	1.99287	0.00140051	-3.1831e-05	0.00133684	6.30333
1278.56	7.84	0.347	-0.994	2	0.1	0.213	0.235	3.99287	1.99287	0.00140051	-3.1831e-05	0.00133684	6.30333
1279.55	7.84	0.347	-0.994	2	0.1	0.213	0.235	3.99287	1.99287	0.00140051	-3.1831e-05	0.00133684	6.30333
1280.53	7.84	0.347	-0.994	2	0.1	0.213	0.235	3.99287	1.99287	0.00140051	-3.1831e-05	0.00133684	6.30333
1281.62	7.84	0.347	-0.994	2	0.1	0.213	0.235	3.99287	1.99287	0.00140051	-3.1831e-05	0.00133684	6.30333
1282.61	7.84	0.347	-0.994	2	0.1	0.213	0.235	3.99287	1.99287	0.00140051	-3.1831e-05	0.00133684	6.30333
1283.59	7.84	0.347	-0.994	2	0.1	0.213	0.235	3.99287	1.99287	0.00140051	-3.1831e-05	0.00133684	6.30333
1284.58	7.84	0.347	-0.994	2	0.1	0.213	0.235	3.99287	1.99287	0.00140051	-3.1831e-05	0.00133684	6.30333
1285.56	7.84	0.347	-0.994	2	0.1	0.213	0.235	3.99287	1.99287	0.00140051	-3.1831e-05	0.00133684	6.30333
1286.54	7.84	0.347	-0.994	2	0.1	0.213	0.235	3.99287	1.99287	0.00140051	-3.1831e-05	0.00133684	6.30333
1287.53	7.84	0.348	-0.994	2	0.1	0.213	0.235	3.99287	1.99287	0.00141023	-3.1831e-05	0.00134657	6.30333
1288.62	7.84	0.347	-0.994	2	0.1	0.213	0.235	3.99287	1.99287	0.00140051	-3.1831e-05	0.00133684	6.30333
1289.61	7.84	0.348	-0.994	2	0.1	0.213	0.235	3.99287	1.99287	0.00141023	-3.1831e-05	0.00134657	6.30333
1290.59	7.84	0.348	-0.994	2	0.1	0.213	0.235	3.99287	1.99287	0.00141023	-3.1831e-05	0.00134657	6.30333
1291.58	7.84	0.348	-0.994	2	0.1	0.213	0.235	3.99287	1.99287	0.00141023	-3.1831e-05	0.00134657	6.30333
1292.56	7.86	0.348	-0.994	2	0.1	0.213	0.235	4.00306	2.00306	0.00141023	-3.1831e-05	0.00134657	6.30333
1293.54	7.86	0.347	-0.994	2	0.1	0.213	0.235	4.00306	2.00306	0.00140051	-3.1831e-05	0.00133684	6.30333
1294.53	7.84	0.348	-0.994	2	0.1	0.213	0.235	3.99287	1.99287	0.00141023	-3.1831e-05	0.00134657	6.30333
1295.62	7.84	0.348	-0.994	2	0.1	0.213	0.235	3.99287	1.99287	0.00141023	-3.1831e-05	0.00134657	6.30333
1296.61	7.84	0.348	-0.994	2	0.1	0.213	0.235	3.99287	1.99287	0.00141023	-3.1831e-05	0.00134657	6.30333
1297.6	7.84	0.348	-0.994	2	0.1	0.213	0.235	3.99287	1.99287	0.00141023	-3.1831e-05	0.00134657	6.30333
1298.58	7.84	0.348	-0.994	2	0.1	0.213	0.235	3.99287	1.99287	0.00141023	-3.1831e-05	0.00134657	6.30333
1299.56	7.84	0.348	-0.994	2	0.1	0.213	0.235	3.99287	1.99287	0.00141023	-3.1831e-05	0.00134657	6.30333
1300.55	7.84	0.348	-0.993	2	0.1	0.213	0.235	3.99287	1.99287	0.00141023	-2.54648e-05	0.0013593	6.30333
1301.53	7.84	0.348	-0.993	2	0.1	0.213	0.235	3.99287	1.99287	0.00141023	-2.54648e-05	0.0013593	6.30333
1302.62	7.84	0.348	-0.993	2	0.1	0.213	0.235	3.99287	1.99287	0.00141023	-2.54648e-05	0.0013593	6.30333
1303.61	7.84	0.348	-0.993	2	0.1	0.213	0.235	3.99287	1.99287	0.00141023	-2.54648e-05	0.0013593	6.30333
1304.59	7.84	0.348	-0.993	2	0.1	0.213	0.235	3.99287	1.99287	0.00141023	-2.54648e-05	0.0013593	6.30333
1305.58	7.84	0.348	-0.993	2	0.1	0.213	0.235	3.99287	1.99287	0.00141023	-2.54648e-05	0.0013593	6.30333
1306.56	7.84	0.348	-0.993	2	0.1	0.213	0.235	3.99287	1.99287	0.00141023	-2.54648e-05	0.0013593	6.30333
1307.55	7.86	0.348	-0.993	2	0.1	0.213	0.235	4.00306	2.00306	0.00141023	-2.54648e-05	0.0013593	6.30333
1308.53	7.86	0.348	-0.993	2	0.1	0.213	0.235	4.00306	2.00306	0.00141023	-2.54648e-05	0.0013593	6.30333
1309.62	7.84	0.348	-0.993	2	0.1	0.213	0.235	3.99287	1.99287	0.00141023	-2.54648e-05	0.0013593	6.30333
1310.61	7.84	0.35	-0.993	2	0.1	0.213	0.235	3.99287	1.99287	0.00142968	-2.54648e-05	0.00137875	6.30333
1311.59	7.84	0.35	-0.993	2	0.1	0.213	0.235	3.99287	1.99287	0.00142968	-2.54648e-05	0.00137875	6.30333
1312.58	7.84	0.348	-0.993	2	0.1	0.213	0.235	3.99287	1.99287	0.00141023	-2.54648e-05	0.0013593	6.30333
1313.56	7.84	0.35	-0.993	2	0.1	0.213	0.235	3.99287	1.99287	0.00142968	-2.54648e-05	0.00137875	6.30333
1314.55	7.84	0.348	-0.993	2	0.1	0.213	0.235	3.99287	1.99287	0.00141023	-2.54648e-05	0.0013593	6.30333
1315.53	7.84	0.348	-0.993	2	0.1	0.213	0.235	3.99287	1.99287	0.00141023	-2.54648e-05	0.0013593	6.30333
1316.62	7.84	0.348	-0.993	2	0.1	0.213	0.235	3.99287	1.99287	0.00141023	-2.54648e-05	0.0013593	6.30333
1317.61	7.84	0.35	-0.993	2	0.1	0.213	0.235	3.99287	1.99287	0.00142968	-2.54648e-05	0.00137875	6.30333
1318.59	7.84	0.35	-0.993	2	0.1	0.213	0.235	3.99287	1.99287	0.00142968	-2.54648e-05	0.00137875	6.30333
1319.58	7.84	0.348	-0.993	2	0.1	0.213	0.235	3.99287	1.99287	0.00141023	-2.54648e-05	0.0013593	6.30333
1320.56	7.84	0.35	-0.993	2	0.1	0.213	0.23	3.99287	1.99287	0.00142968	-2.54648e-05	0.00137875	6.16922
1321.55	7.84	0.35	-0.993	2	0.1	0.213	0.235	3.99287	1.99287	0.00142968	-2.54648e-05	0.00137875	6.30333
1322.53	7.84	0.35	-0.993	2	0.1	0.213	0.235	3.99287	1.99287	0.00142968	-2.54648e-05	0.00137875	6.30333
1323.62	7.84	0.35	-0.993	2	0.1	0.213	0.235	3.99287	1.99287	0.00142968	-2.54648e-05	0.00137875	6.30333
1324.61	7.84	0.35	-0.993	2	0.1	0.213	0.235	3.99287	1.99287	0.00142968	-2.54648e-05	0.00137875	6.30333
1325.59	7.84	0.35	-0.993	2	0.1	0.213	0.235	3.99287	1.99287	0.00142968	-2.54648e-05	0.00137875	6.30333
1326.58	7.84	0.348	-0.993	2	0.1	0.213	0.235	3.99287	1.99287	0.00141023	-2.54648e-05	0.0013593	6.30333
1327.56	7.86	0.35	-0.993	2	0.1	0.213	0.235	4.00306	2.00306	0.00142968	-2.54648e-05	0.00137875	6.30333
1328.55	7.84	0.35	-0.993	2	0.1	0.213	0.235	3.99287	1.99287	0.00142968	-2.54648e-05	0.00137875	6.30333
1329.53	7.84	0.35	-0.993	2	0.1	0.213	0.235	3.99287	1.99287	0.00142968	-2.54648e-05	0.00137875	6.30333
1330.62	7.84	0.35	-0.992	2	0.1	0.213	0.235	3.99287	1.99287	0.00142968	-1.90986e-05	0.00139149	6.30333
1331.61	7.84	0.35	-0.992	2	0.1	0.213	0.235	3.99287	1.99287	0.00142968	-1.90986e-05	0.00139149	6.30333
1332.59	7.84	0.35	-0.992	2	0.1	0.213	0.235	3.99287	1.99287	0.00142968	-1.90986e-05	0.00139149	6.30333
1333.58	7.84	0.35	-0.992	2	0.1	0.213	0.235	3.99287	1.99287	0.00142968	-1.90986e-05	0.00139149	6.30333
1334.56	7.84	0.35	-0.992	2	0.1	0.213	0.235	3.99287	1.99287	0.00142968	-1.90986e-05	0.00139149	6.30333
1335.55	7.84	0.35	-0.992	2	0.1	0.213	0.235	3.99287	1.99287	0.00142968	-1.90986e-05	0.00139149	6.30333
1336.53	7.84	0.35	-0.992	2	0.1	0.213	0.235	3.99287	1.99287	0.00142968	-1.90986e-05	0.00139149	6.30333
1337.62	7.86	0.35	-0.992	2	0.1	0.213	0.235	4.00306	2.00306	0.00142968	-1.90986e-05	0.00139149	6.30333
1338.61	7.86	0.35	-0.992	2	0.1	0.213	0.23	4.00306	2.00306	0.00142968	-1.90986e-05	0.00139149	6.16922
1339.59	7.86	0.35	-0.992	2	0.1	0.213	0.235	4.00306	2.00306	0.00142968	-1.90986e-05	0.00139149	6.30333
1340.58	7.86	0.35	-0.992	2	0.1	0.213	0.235	4.00306	2.00306	0.00142968	-1.90986e-05	0.00139149	6.30333
1341.56	7.86	0.35	-0.992	2	0.1	0.213	0.235	4.00306	2.00306	0.00142968	-1.90986e-05	0.00139149	6.30333
1342.55	7.86	0.35	-0.992	2	0.1	0.213	0.23	4.00306	2.00306	0.00142968	-1.90986e-05	0.00139149	6.16922
1343.53	7.86	0.351	-0.992	2	0.1	0.213	0.235	4.00306	2.00306	0.00143941	-1.90986e-05	0.00140121	6.30333
1344.62	7.88	0.351	-0.992	2	0.1	0.213	0.235	4.01324	2.01324	0.00143941	-1.90986e-05	0.00140121	6.30333
1345.61	7.88	0.35	-0.992	2	0.1	0.213	0.235	4.01324	2.01324	0.00142968	-1.90986e-05	0.00139149	6.30333
1346.59	7.86	0.351	-0.992	2	0.1	0.213	0.235	4.00306	2.00306	0.00143941	-1.90986e-05	0.00140121	6.30333
1347.58	7.86	0.351	-0.992	2	0.1	0.213	0.23	4.00306	2.00306	0.00143941	-1.90986e-05	0.00140121	6.16922
1348.56	7.86	0.35	-0.992	2	0.1	0.213	0.235	4.00306	2.00306	0.00142968	-1.90986e-05	0.00139149	6.30333
1349.55	7.86	0.351	-0.992	2	0.1	0.213	0.235	4.00306	2.00306	0.00143941	-1.90986e-05	0.00140121	6.30333
1350.53	7.86	0.351	-0.992	2	0.1	0.213	0.23	4.00306	2.00306	0.00143941	-1.90986e-05	0.00140121	6.16922
1351.62	7.86	0.351	-0.992	2	0.1	0.213	0.23	4.00306	2.00306	0.00143941	-1.90986e-05	0.00140121	6.16922
1352.61	7.86	0.35	-0.992	2	0.1	0.213	0.235	4.00306	2.00306	0.00142968	-1.90986e-05	0.00139149	6.30333
1353.59	7.86	0.351	-0.992	2	0.1	0.213	0.23	4.00306	2.00306	0.00143941	-1.90986e-05	0.00140121	6.16922
1354.58	7.84	0.351	-0.992	2	0.1	0.213	0.235	3.99287	1.99287	0.00143941	-1.90986e-05	0.00140121	6.30333
1355.56	7.84	0.351	-0.992	2	0.1	0.213	0.23	3.99287	1.99287	0.00143941	-1.90986e-05	0.00140121	6.16922
1356.55	7.84	0.351	-0.992	2	0.1	0.213	0.23	3.99287	1.99287	0.00143941	-1.90986e-05	0.00140121	6.16922
1357.53	7.84	0.351	-0.992	2	0.1	0.213	0.23	3.99287	1.99287	0.00143941	-1.90986e-05	0.00140121	6.16922
1358.62	7.84	0.351	-0.992	2	0.1	0.213	0.23	3.99287	1.99287	0.00143941	-1.90986e-05	0.00140121	6.16922
1359.61	7.84	0.351	-0.992	2	0.1	0.213	0.23	3.99287	1.99287	0.00143941	-1.90986e-05	0.00140121	6.16922
1360.59	7.84	0.351	-0.992	2	0.1	0.213	0.23	3.99287	1.99287	0.00143941	-1.90986e-05	0.00140121	6.16922
1361.58	7.86	0.351	-0.992	2	0.1	0.213	0.23	4.00306	2.00306	0.00143941	-1.90986e-05	0.00140121	6.16922
1362.56	7.86	0.351	-0.992	2	0.1	0.213	0.23	4.00306	2.00306	0.00143941	-1.90986e-05	0.00140121	6.16922
1363.55	7.86	0.351	-0.992	2	0.1	0.213	0.23	4.00306	2.00306	0.00143941	-1.90986e-05	0.00140121	6.16922
1364.53	7.84	0.351	-0.992	2	0.1	0.213	0.23	3.99287	1.99287	0.00143941	-1.90986e-05	0.00140121	6.16922
1365.62	7.84	0.351	-0.992	2	0.1	0.213	0.23	3.99287	1.99287	0.00143941	-1.90986e-05	0.00140121	6.16922
1366.61	7.84	0.351	-0.992	2	0.1	0.213	0.23	3.99287	1.99287	0.00143941	-1.90986e-05	0.00140121	6.16922
1367.6	7.86	0.351	-0.992	2	0.1	0.213	0.23	4.00306	2.00306	0.00143941	-1.90986e-05	0.00140121	6.16922
1368.58	7.84	0.351	-0.991	2	0.1	0.213	0.23	3.99287	1.99287	0.00143941	-1.27324e-05	0.00141394	6.16922
1369.56	7.84	0.351	-0.991	2	0.1	0.213	0.23	3.99287	1.99287	0.00143941	-1.27324e-05	0.00141394	6.16922
1370.55	7.84	0.351	-0.991	2	0.1	0.213	0.23	3.99287	1.99287	0.00143941	-1.27324e-05	0.00141394	6.16922
1371.53	7.84	0.351	-0.991	2	0.1	0.213	0.23	3.99287	1.99287	0.00143941	-1.27324e-05	0.00141394	6.16922
1372.62	7.84	0.351	-0.991	2	0.1	0.213	0.235	3.99287	1.99287	0.00143941	-1.27324e-05	0.00141394	6.30333
1373.61	7.84	0.351	-0.991	2	0.1	0.213	0.23	3.99287	1.99287	0.00143941	-1.27324e-05	0.00141394	6.16922
1374.59	7.84	0.351	-0.991	2	0.1	0.213	0.23	3.99287	1.99287	0.00143941	-1.27324e-05	0.00141394	6.16922
1375.58	7.84	0.351	-0.991	2	0.1	0.213	0.23	3.99287	1.99287	0.00143941	-1.27324e-05	0.00141394	6.16922
1376.56	7.84	0.351	-0.991	2	0.1	0.213	0.23	3.99287	1.99287	0.00143941	-1.27324e-05	0.00141394	6.16922
1377.55	7.84	0.351	-0.991	2	0.1	0.213	0.23	3.99287	1.99287	0.00143941	-1.27324e-05	0.00141394	6.16922
1378.53	7.84	0.351	-0.991	2	0.1	0.213	0.23	3.99287	1.99287	0.00143941	-1.27324e-05	0.00141394	6.16922
1379.62	7.84	0.351	-0.991	2	0.1	0.213	0.235	3.99287	1.99287	0.00143941	-1.27324e-05	0.00141394	6.30333
1380.61	7.84	0.351	-0.991	2	0.1	0.213	0.23	3.99287	1.99287	0.00143941	-1.27324e-05	0.00141394	6.16922
1381.59	7.84	0.351	-0.991	2	0.1	0.213	0.23	3.99287	1.99287	0.00143941	-1.27324e-05	0.00141394	6.16922
1382.58	7.84	0.351	-0.991	2	0.1	0.213	0.23	3.99287	1.99287	0.00143941	-1.27324e-05	0.00141394	6.16922
1383.56	7.84	0.351	-0.991	2	0.1	0.213	0.23	3.99287	1.99287	0.00143941	-1.27324e-05	0.00141394	6.16922
1384.55	7.84	0.351	-0.991	2	0.1	0.213	0.23	3.99287	1.99287	0.00143941	-1.27324e-05	0.00141394	6.16922
1385.53	7.84	0.351	-0.991	2	0.1	0.213	0.23	3.99287	1.99287	0.00143941	-1.27324e-05	0.00141394	6.16922
1386.62	7.84	0.351	-0.991	2	0.1	0.213	0.23	3.99287	1.99287	0.00143941	-1.27324e-05	0.00141394	6.16922
1387.61	7.84	0.351	-0.991	2	0.1	0.213	0.23	3.99287	1.99287	0.00143941	-1.27324e-05	0.00141394	6.16922
1388.59	7.84	0.351	-0.991	2	0.1	0.213	0.23	3.99287	1.99287	0.00143941	-1.27324e-05	0.00141394	6.16922
1389.58	7.84	0.351	-0.991	2	0.1	0.213	0.23	3.99287	1.99287	0.00143941	-1.27324e-05	0.00141394	6.16922
1390.56	7.84	0.351	-0.991	2	0.1	0.213	0.23	3.99287	1.99287	0.00143941	-1.27324e-05	0.00141394	6.16922
1391.55	7.84	0.351	-0.991	2	0.1	0.213	0.23	3.99287	1.99287	0.00143941	-1.27324e-05	0.00141394	6.16922
1392.53	7.84	0.351	-0.991	2	0.1	0.213	0.23	3.99287	1.99287	0.00143941	-1.27324e-05	0.00141394	6.16922
1393.62	7.84	0.351	-0.991	2	0.1	0.213	0.23	3.99287	1.99287	0.00143941	-1.27324e-05	0.00141394	6.16922
1394.61	7.84	0.351	-0.991	2	0.1	0.213	0.23	3.99287	1.99287	0.00143941	-1.27324e-05	0.00141394	6.16922
1395.59	7.86	0.353	-0.991	2	0.1	0.213	0.23	4.00306	2.00306	0.00145886	-1.27324e-05	0.0014334	6.16922
1396.58	7.84	0.351	-0.991	2	0.1	0.213	0.23	3.99287	1.99287	0.00143941	-1.27324e-05	0.00141394	6.16922
1397.56	7.84	0.353	-0.991	2	0.1	0.213	0.23	3.99287	1.99287	0.00145886	-1.27324e-05	0.0014334	6.16922
1398.55	7.84	0.353	-0.991	2.02	0.1	0.213	0.23	3.99287	1.97287	0.00145886	-1.27324e-05	0.0014334	6.16922
1399.53	7.86	0.351	-0.99	2.06	0.1	0.213	0.23	4.00306	1.94306	0.00143941	-6.3662e-06	0.00142668	6.16922
1400.62	7.84	0.351	-0.99	2.07	0.1	0.213	0.23	3.99287	1.92287	0.00143941	-6.3662e-06	0.00142668	6.16922
1401.61	7.84	0.353	-0.989	2.11	0.1	0.213	0.23	3.99287	1.88287	0.00145886	0	0.00145886	6.16922
1402.6	7.84	0.353	-0.988	2.165	0.1	0.213	0.23	3.99287	1.82787	0.00145886	6.3662e-06	0.00147159	6.16922
1403.58	7.86	0.351	-0.987	2.235	0.1	0.213	0.23	4.00306	1.76806	0.00143941	1.27324e-05	0.00146487	6.16922
1404.56	7.86	0.351	-0.984	2.3	0.1	0.213	0.23	4.00306	1.70306	0.00143941	3.1831e-05	0.00150307	6.16922
1405.55	7.86	0.353	-0.981	2.36	0.1	0.213	0.23	4.00306	1.64306	0.00145886	5.09296e-05	0.00156072	6.16922
1406.53	7.84	0.353	-0.978	2.415	0.1	0.213	0.23	3.99287	1.57787	0.00145886	7.00282e-05	0.00159892	6.16922
1407.62	7.84	0.351	-0.974	2.47	0.1	0.213	0.23	3.99287	1.52287	0.00143941	9.5493e-05	0.00163039	6.16922
1408.61	7.84	0.351	-0.971	2.53	0.1	0.213	0.23	3.99287	1.46287	0.00143941	0.000114592	0.00166859	6.16922
1409.59	7.84	0.351	-0.968	2.59	0.1	0.213	0.225	3.99287	1.40287	0.00143941	0.00013369	0.00170679	6.0351
1410.58	7.84	0.353	-0.966	2.635	0.1	0.213	0.225	3.99287	1.35787	0.00145886	0.000146423	0.00175171	6.0351
1411.56	7.84	0.353	-0.964	2.67	0.1	0.213	0.225	3.99287	1.32287	0.00145886	0.000159155	0.00177717	6.0351
1412.55	7.84	0.353	-0.962	2.725	0.1	0.213	0.225	3.99287	1.26787	0.00145886	0.000171887	0.00180263	6.0351
1413.53	7.84	0.353	-0.96	2.77	0.1	0.213	0.225	3.99287	1.22287	0.00145886	0.00018462	0.0018281	6.0351
1414.62	7.84	0.353	-0.958	2.82	0.1	0.213	0.225	3.99287	1.17287	0.00145886	0.000197352	0.00185356	6.0351
1415.61	7.84	0.351	-0.955	2.87	0.1	0.213	0.225	3.99287	1.12287	0.00143941	0.000216451	0.00187231	6.0351
1416.59	7.84	0.351	-0.953	2.915	0.1	0.213	0.225	3.99287	1.07787	0.00143941	0.000229183	0.00189777	6.0351
1417.58	7.84	0.351	-0.951	2.965	0.1	0.213	0.225	3.99287	1.02787	0.00143941	0.000241916	0.00192324	6.0351
1418.56	7.86	0.351	-0.948	3.015	0.1	0.213	0.225	4.00306	0.988056	0.00143941	0.000261014	0.00196144	6.0351
1419.55	7.86	0.351	-0.945	3.06	0.1	0.213	0.22	4.00306	0.943056	0.00143941	0.000280113	0.00199963	5.90099
1420.53	7.86	0.351	-0.942	3.11	0.1	0.213	0.22	4.00306	0.893056	0.00143941	0.000299211	0.00203783	5.90099
1421.62	7.86	0.351	-0.939	3.165	0.1	0.213	0.22	4.00306	0.838056	0.00143941	0.00031831	0.00207603	5.90099
1422.61	7.86	0.353	-0.936	3.205	0.1	0.213	0.22	4.00306	0.798056	0.00145886	0.000337408	0.00213368	5.90099
1423.59	7.86	0.353	-0.933	3.25	0.1	0.213	0.22	4.00306	0.753056	0.00145886	0.000356507	0.00217187	5.90099
1424.58	7.88	0.351	-0.929	3.325	0.1	0.213	0.22	4.01324	0.688242	0.00143941	0.000381972	0.00220335	5.90099
1425.56	7.88	0.351	-0.926	3.375	0.1	0.213	0.22	4.01324	0.638242	0.00143941	0.00040107	0.00224155	5.90099
1426.55	7.86	0.351	-0.922	3.425	0.1	0.213	0.215	4.00306	0.578056	0.00143941	0.000426535	0.00229248	5.76688
1427.53	7.86	0.351	-0.918	3.47	0.1	0.213	0.215	4.00306	0.533056	0.00143941	0.000452	0.00234341	5.76688
1428.62	7.86	0.351	-0.915	3.525	0.1	0.213	0.215	4.00306	0.478056	0.00143941	0.000471099	0.00238161	5.76688
1429.61	7.86	0.351	-0.911	3.57	0.1	0.213	0.215	4.00306	0.433056	0.00143941	0.000496563	0.00243254	5.76688
1430.59	7.86	0.351	-0.908	3.62	0.1	0.213	0.215	4.00306	0.383056	0.00143941	0.000515662	0.00247073	5.76688
1431.58	7.86	0.35	-0.905	3.665	0.1	0.213	0.215	4.00306	0.338056	0.00142968	0.000534761	0.0024992	5.76688
1432.56	7.84	0.35	-0.902	3.715	0.1	0.213	0.21	3.99287	0.27787	0.00142968	0.000553859	0.0025374	5.63276
1433.55	7.84	0.35	-0.899	3.765	0.1	0.213	0.21	3.99287	0.22787	0.00142968	0.000572958	0.0025756	5.63276
1434.53	7.84	0.35	-0.895	3.82	0.1	0.213	0.21	3.99287	0.17287	0.00142968	0.000598423	0.00262653	5.63276
1435.62	7.84	0.35	-0.891	3.87	0.1	0.213	0.21	3.99287	0.12287	0.00142968	0.000623887	0.00267746	5.63276
1436.61	7.84	0.35	-0.888	3.915	0.1	0.213	0.21	3.99287	0.0778699	0.00142968	0.000642986	0.00271565	5.63276
1437.59	7.84	0.348	-0.885	3.965	0.1	0.213	0.21	3.99287	0.0278699	0.00141023	0.000662085	0.0027344	5.63276
1438.58	7.84	0.348	-0.881	4.02	0.1	0.213	0.205	3.99287	-0.0271301	0.00141023	0.000687549	0.00278533	5.49865
1439.56	7.86	0.348	-0.878	4.065	0.1	0.213	0.205	4.00306	-0.0619442	0.00141023	0.000706648	0.00282353	5.49865
1440.55	7.86	0.348	-0.875	4.115	0.1	0.213	0.205	4.00306	-0.111944	0.00141023	0.000725747	0.00286172	5.49865
1441.53	7.86	0.348	-0.871	4.165	0.1	0.213	0.205	4.00306	-0.161944	0.00141023	0.000751211	0.00291265	5.49865
1442.62	7.86	0.348	-0.867	4.22	0.1	0.213	0.205	4.00306	-0.216944	0.00141023	0.000776676	0.00296358	5.49865
1443.61	7.86	0.347	-0.864	4.27	0.1	0.213	0.205	4.00306	-0.266944	0.00140051	0.000795775	0.00299206	5.49865
1444.59	7.86	0.347	-0.86	4.32	0.1	0.213	0.205	4.00306	-0.316944	0.00140051	0.00082124	0.00304298	5.49865
1445.58	7.86	0.345	-0.856	4.37	0.1	0.213	0.205	4.00306	-0.366944	0.00138105	0.000846704	0.00307446	5.49865
1446.56	7.86	0.345	-0.853	4.415	0.1	0.213	0.205	4.00306	-0.411944	0.00138105	0.000865803	0.00311266	5.49865
1447.55	7.86	0.345	-0.849	4.465	0.1	0.213	0.2	4.00306	-0.461944	0.00138105	0.000891268	0.00316359	5.36454
1448.53	7.86	0.345	-0.846	4.515	0.1	0.213	0.2	4.00306	-0.511944	0.00138105	0.000910366	0.00320179	5.36454
1449.62	7.86	0.345	-0.842	4.57	0.1	0.213	0.2	4.00306	-0.566944	0.00138105	0.000935831	0.00325272	5.36454
1450.61	7.86	0.344	-0.838	4.62	0.1	0.213	0.2	4.00306	-0.616944	0.00137133	0.000961296	0.00329392	5.36454
1451.59	7.86	0.344	-0.835	4.665	0.1	0.213	0.2	4.00306	-0.661944	0.00137133	0.000980394	0.00333212	5.36454
1452.58	7.86	0.342	-0.831	4.72	0.1	0.213	0.2	4.00306	-0.716944	0.00135188	0.00100586	0.0033636	5.36454
1453.56	7.86	0.342	-0.828	4.77	0.1	0.213	0.2	4.00306	-0.766944	0.00135188	0.00102496	0.00340179	5.36454
1454.55	7.86	0.342	-0.824	4.82	0.1	0.213	0.195	4.00306	-0.816944	0.00135188	0.00105042	0.00345272	5.23042
1455.53	7.86	0.341	-0.821	4.865	0.1	0.213	0.195	4.00306	-0.861944	0.00134215	0.00106952	0.00348119	5.23042
1456.62	7.86	0.341	-0.817	4.92	0.1	0.213	0.195	4.00306	-0.916944	0.00134215	0.00109499	0.00353212	5.23042
1457.61	7.86	0.339	-0.813	4.965	0.1	0.213	0.195	4.00306	-0.961944	0.0013227	0.00112045	0.0035636	5.23042
1458.59	7.86	0.339	-0.809	5.015	0.1	0.213	0.195	4.00306	-1.01194	0.0013227	0.00114592	0.00361453	5.23042
1459.58	7.86	0.338	-0.806	5.065	0.1	0.213	0.195	4.00306	-1.06194	0.00131297	0.00116501	0.003643	5.23042
1460.56	7.86	0.338	-0.802	5.115	0.1	0.213	0.195	4.00306	-1.11194	0.00131297	0.00119048	0.00369393	5.23042
1461.54	7.86	0.337	-0.798	5.165	0.1	0.213	0.19	4.00306	-1.16194	0.00130325	0.00121594	0.00373514	5.09631
1462.53	7.86	0.337	-0.794	5.215	0.1	0.213	0.19	4.00306	-1.21194	0.00130325	0.00124141	0.00378607	5.09631
1463.62	7.86	0.335	-0.79	5.27	0.1	0.213	0.19	4.00306	-1.26694	0.0012838	0.00126687	0.00381754	5.09631
1464.61	7.86	0.335	-0.786	5.32	0.1	0.213	0.19	4.00306	-1.31694	0.0012838	0.00129234	0.00386847	5.09631
1465.59	7.86	0.335	-0.78	5.335	0.1	0.213	0.19	4.00306	-1.33194	0.0012838	0.00133054	0.00394487	5.09631
1466.58	7.86	0.334	-0.776	5.43	0.1	0.213	0.19	4.00306	-1.42694	0.00127407	0.001356	0.00398607	5.09631
1467.56	7.88	0.334	-0.772	5.48	0.1	0.213	0.185	4.01324	-1.46676	0.00127407	0.00138146	0.004037	4.9622
1468.55	7.88	0.332	-0.768	5.525	0.1	0.213	0.185	4.01324	-1.51176	0.00125462	0.00140693	0.00406848	4.9622
1469.53	7.86	0.332	-0.765	5.57	0.1	0.213	0.185	4.00306	-1.56694	0.00125462	0.00142603	0.00410668	4.9622
1470.62	7.86	0.331	-0.761	5.62	0.1	0.213	0.185	4.00306	-1.61694	0.00124489	0.00145149	0.00414788	4.9622
1471.61	7.86	0.329	-0.757	5.67	0.1	0.213	0.185	4.00306	-1.66694	0.00122544	0.00147696	0.00417936	4.9622
1472.6	7.86	0.329	-0.754	5.72	0.1	0.213	0.185	4.00306	-1.71694	0.00122544	0.00149606	0.00421756	4.9622
1473.58	7.86	0.328	-0.75	5.77	0.1	0.213	0.185	4.00306	-1.76694	0.00121572	0.00152152	0.00425876	4.9622
1474.56	7.86	0.328	-0.746	5.82	0.1	0.213	0.185	4.00306	-1.81694	0.00121572	0.00154699	0.00430969	4.9622
1475.55	7.86	0.326	-0.743	5.865	0.1	0.213	0.185	4.00306	-1.86194	0.00119627	0.00156608	0.00432843	4.9622
1476.53	7.86	0.326	-0.739	5.915	0.1	0.213	0.18	4.00306	-1.91194	0.00119627	0.00159155	0.00437936	4.82808
1477.62	7.86	0.325	-0.735	5.965	0.1	0.213	0.18	4.00306	-1.96194	0.00118654	0.00161701	0.00442057	4.82808
1478.61	7.86	0.323	-0.731	6.015	0.1	0.213	0.18	4.00306	-2.01194	0.00116709	0.00164248	0.00445205	4.82808
1479.59	7.86	0.322	-0.728	6.065	0.1	0.213	0.18	4.00306	-2.06194	0.00115736	0.00166158	0.00448052	4.82808
1480.58	7.86	0.322	-0.724	6.12	0.1	0.213	0.18	4.00306	-2.11694	0.00115736	0.00168704	0.00453145	4.82808
1481.56	7.84	0.32	-0.72	6.165	0.1	0.213	0.18	3.99287	-2.17213	0.00113791	0.00171251	0.00456293	4.82808
1482.55	7.84	0.32	-0.717	6.215	0.1	0.213	0.18	3.99287	-2.22213	0.00113791	0.00173161	0.00460112	4.82808
1483.53	7.84	0.319	-0.713	6.265	0.1	0.213	0.175	3.99287	-2.27213	0.00112819	0.00175707	0.00464233	4.69397
1484.62	7.84	0.319	-0.709	6.32	0.1	0.213	0.175	3.99287	-2.32713	0.00112819	0.00178254	0.00469326	4.69397
1485.61	7.82	0.319	-0.706	6.37	0.1	0.213	0.175	3.98268	-2.38732	0.00112819	0.00180163	0.00473145	4.69397
1486.59	7.82	0.317	-0.703	6.42	0.1	0.213	0.175	3.98268	-2.43732	0.00110873	0.00182073	0.0047502	4.69397
1487.58	7.82	0.316	-0.699	6.47	0.1	0.213	0.175	3.98268	-2.48732	0.00109901	0.0018462	0.0047914	4.69397
1488.56	7.82	0.316	-0.696	6.52	0.1	0.213	0.175	3.98268	-2.53732	0.00109901	0.0018653	0.0048296	4.69397
1489.55	7.84	0.316	-0.692	6.565	0.1	0.213	0.175	3.99287	-2.57213	0.00109901	0.00189076	0.00488053	4.69397
1490.53	7.84	0.315	-0.689	6.615	0.1	0.213	0.175	3.99287	-2.62213	0.00108928	0.00190986	0.004909	4.69397
1491.62	7.84	0.315	-0.685	6.665	0.1	0.213	0.17	3.99287	-2.67213	0.00108928	0.00193532	0.00495993	4.55986
1492.61	7.84	0.315	-0.682	6.715	0.1	0.213	0.17	3.99287	-2.72213	0.00108928	0.00195442	0.00499813	4.55986
1493.59	7.84	0.313	-0.679	6.77	0.1	0.213	0.17	3.99287	-2.77713	0.00106983	0.00197352	0.00501687	4.55986
1494.58	7.84	0.312	-0.675	6.82	0.1	0.213	0.17	3.99287	-2.82713	0.00106011	0.00199899	0.00505808	4.55986
1495.56	7.84	0.312	-0.672	6.87	0.1	0.213	0.17	3.99287	-2.87713	0.00106011	0.00201808	0.00509627	4.55986
1496.55	7.84	0.312	-0.669	6.915	0.1	0.213	0.17	3.99287	-2.92213	0.00106011	0.00203718	0.00513447	4.55986
1497.53	7.84	0.31	-0.665	6.96	0.1	0.213	0.17	3.99287	-2.96713	0.00104065	0.00206265	0.00516595	4.55986
1498.62	7.84	0.31	-0.662	7.02	0.1	0.213	0.17	3.99287	-3.02713	0.00104065	0.00208175	0.00520415	4.55986
1499.61	7.84	0.31	-0.659	7.065	0.1	0.213	0.17	3.99287	-3.07213	0.00104065	0.00210085	0.00524234	4.55986
1500.59	7.84	0.309	-0.655	7.125	0.1	0.213	0.17	3.99287	-3.13213	0.00103093	0.00212631	0.00528355	4.55986
1501.58	7.84	0.309	-0.652	7.17	0.1	0.213	0.165	3.99287	-3.17713	0.00103093	0.00214541	0.00532175	4.42574
1502.56	7.84	0.307	-0.649	7.215	0.1	0.213	0.165	3.99287	-3.22213	0.00101148	0.00216451	0.00534049	4.42574
1503.55	7.84	0.307	-0.646	7.26	0.1	0.213	0.165	3.99287	-3.26713	0.00101148	0.00218361	0.00537869	4.42574
1504.53	7.84	0.307	-0.643	7.315	0.1	0.213	0.165	3.99287	-3.32213	0.00101148	0.0022027	0.00541689	4.42574
1505.62	7.84	0.306	-0.639	7.37	0.1	0.213	0.165	3.99287	-3.37713	0.00100175	0.00222817	0.00545809	4.42574
1506.61	7.86	0.304	-0.636	7.42	0.1	0.213	0.165	4.00306	-3.41694	0.000982299	0.00224727	0.00547683	4.42574
1507.6	7.84	0.304	-0.632	7.465	0.1	0.213	0.165	3.99287	-3.47213	0.000982299	0.00227273	0.00552776	4.42574
1508.58	7.86	0.303	-0.629	7.52	0.1	0.213	0.165	4.00306	-3.51694	0.000972573	0.00229183	0.00555624	4.42574
1509.56	7.86	0.303	-0.626	7.565	0.1	0.213	0.165	4.00306	-3.56194	0.000972573	0.00231093	0.00559443	4.42574
1510.54	7.84	0.301	-0.623	7.62	0.1	0.213	0.165	3.99287	-3.62713	0.000953122	0.00233003	0.00561318	4.42574
1511.53	7.84	0.301	-0.62	7.665	0.1	0.213	0.16	3.99287	-3.67213	0.000953122	0.00234913	0.00565138	4.29163
1512.62	7.84	0.3	-0.616	7.72	0.1	0.213	0.16	3.99287	-3.72713	0.000943396	0.00237459	0.00569258	4.29163
1513.61	7.84	0.3	-0.613	7.77	0.1	0.213	0.16	3.99287	-3.77713	0.000943396	0.00239369	0.00573078	4.29163
1514.59	7.86	0.298	-0.61	7.82	0.1	0.213	0.16	4.00306	-3.81694	0.000923945	0.00241279	0.00574952	4.29163
1515.58	7.86	0.298	-0.607	7.865	0.1	0.213	0.16	4.00306	-3.86194	0.000923945	0.00243189	0.00578772	4.29163
1516.56	7.86	0.297	-0.604	7.91	0.1	0.213	0.16	4.00306	-3.90694	0.000914219	0.00245099	0.00581619	4.29163
1517.55	7.88	0.295	-0.601	7.96	0.1	0.213	0.16	4.01324	-3.94676	0.000894768	0.00247008	0.00583494	4.29163
1518.53	7.9	0.295	-0.598	8.015	0.1	0.213	0.16	4.02343	-3.99157	0.000894768	0.00248918	0.00587313	4.29163
1519.62	7.94	0.293	-0.595	8.07	0.1	0.213	0.16	4.0438	-4.0262	0.000875316	0.00250828	0.00589188	4.29163
1520.61	7.96	0.291	-0.592	8.12	0.1	0.213	0.155	4.05399	-4.06601	0.000855865	0.00252738	0.00591063	4.15752
1521.59	7.96	0.288	-0.589	8.17	0.1	0.213	0.155	4.05399	-4.11601	0.000826687	0.00254648	0.00591965	4.15752
1522.58	7.96	0.284	-0.586	8.22	0.1	0.213	0.155	4.05399	-4.16601	0.000787784	0.00256558	0.00591894	4.15752
1523.56	7.92	0.281	-0.584	8.265	0.1	0.213	0.155	4.03361	-4.23139	0.000758607	0.00257831	0.00591523	4.15752
1524.55	7.9	0.279	-0.581	8.32	0.1	0.213	0.155	4.02343	-4.29657	0.000739156	0.00259741	0.00593397	4.15752
1525.53	7.86	0.276	-0.578	8.365	0.1	0.213	0.155	4.00306	-4.36194	0.000709979	0.00261651	0.00594299	4.15752
1526.62	7.84	0.273	-0.574	8.42	0.1	0.213	0.155	3.99287	-4.42713	0.000680801	0.00264197	0.00596475	4.15752
1527.61	7.84	0.272	-0.571	8.415	0.1	0.213	0.155	3.99287	-4.42213	0.000671076	0.00266107	0.00599322	4.15752
1528.59	7.78	0.272	-0.57	8.37	0.1	0.213	0.155	3.96231	-4.40769	0.000671076	0.00266744	0.00600595	4.15752
1529.58	7.76	0.27	-0.57	8.29	0.1	0.213	0.155	3.95213	-4.33787	0.000651624	0.00266744	0.0059865	4.15752
1530.56	7.74	0.27	-0.569	8.315	0.1	0.213	0.155	3.94194	-4.37306	0.000651624	0.0026738	0.00599923	4.15752
1531.55	7.74	0.27	-0.569	8.36	0.1	0.213	0.155	3.94194	-4.41806	0.000651624	0.0026738	0.00599923	4.15752
1532.53	7.74	0.269	-0.568	8.39	0.1	0.213	0.155	3.94194	-4.44806	0.000641898	0.00268017	0.00600224	4.15752
1533.62	7.76	0.269	-0.566	8.415	0.1	0.213	0.155	3.95213	-4.46287	0.000641898	0.0026929	0.0060277	4.15752
1534.61	7.76	0.269	-0.565	8.435	0.1	0.213	0.155	3.95213	-4.48287	0.000641898	0.00269927	0.00604043	4.15752
1535.59	7.76	0.269	-0.564	8.445	0.1	0.213	0.155	3.95213	-4.49287	0.000641898	0.00270563	0.00605317	4.15752
1536.58	7.78	0.268	-0.563	8.46	0.1	0.213	0.155	3.96231	-4.49769	0.000632173	0.002712	0.00605617	4.15752
1537.56	7.78	0.268	-0.562	8.47	0.1	0.213	0.155	3.96231	-4.50769	0.000632173	0.00271837	0.00606891	4.15752
1538.55	7.8	0.268	-0.562	8.48	0.1	0.213	0.155	3.9725	-4.5075	0.000632173	0.00271837	0.00606891	4.15752
1539.53	7.8	0.268	-0.561	8.485	0.1	0.213	0.155	3.9725	-4.5125	0.000632173	0.00272473	0.00608164	4.15752
1540.62	7.82	0.269	-0.56	8.495	0.1	0.213	0.155	3.98268	-4.51232	0.000641898	0.0027311	0.0061041	4.15752
1541.61	7.82	0.269	-0.56	8.505	0.1	0.213	0.15	3.98268	-4.52232	0.000641898	0.0027311	0.0061041	4.0234
1542.59	7.82	0.269	-0.559	8.51	0.1	0.213	0.15	3.98268	-4.52732	0.000641898	0.00273747	0.00611683	4.0234
1543.58	7.82	0.268	-0.559	8.515	0.1	0.213	0.15	3.98268	-4.53232	0.000632173	0.00273747	0.0061071	4.0234
1544.56	7.84	0.268	-0.558	8.525	0.1	0.213	0.15	3.99287	-4.53213	0.000632173	0.00274383	0.00611984	4.0234
1545.55	7.84	0.268	-0.557	8.53	0.1	0.213	0.15	3.99287	-4.53713	0.000632173	0.0027502	0.00613257	4.0234
1546.53	7.84	0.268	-0.557	8.54	0.1	0.213	0.15	3.99287	-4.54713	0.000632173	0.0027502	0.00613257	4.0234
1547.62	7.84	0.268	-0.556	8.545	0.1	0.213	0.15	3.99287	-4.55213	0.000632173	0.00275656	0.0061453	4.0234
1548.61	7.84	0.268	-0.556	8.555	0.1	0.213	0.15	3.99287	-4.56213	0.000632173	0.00275656	0.0061453	4.0234
1549.59	7.86	0.268	-0.555	8.555	0.1	0.213	0.15	4.00306	-4.55194	0.000632173	0.00276293	0.00615803	4.0234
1550.58	7.86	0.268	-0.555	8.565	0.1	0.213	0.15	4.00306	-4.56194	0.000632173	0.00276293	0.00615803	4.0234
1551.56	7.86	0.268	-0.555	8.57	0.1	0.213	0.15	4.00306	-4.56694	0.000632173	0.00276293	0.00615803	4.0234
1552.54	7.86	0.268	-0.554	8.575	0.1	0.213	0.15	4.00306	-4.57194	0.000632173	0.0027693	0.00617076	4.0234
1553.53	7.86	0.268	-0.554	8.575	0.1	0.213	0.15	4.00306	-4.57194	0.000632173	0.0027693	0.00617076	4.0234
1554.62	7.86	0.268	-0.553	8.585	0.1	0.213	0.15	4.00306	-4.58194	0.000632173	0.00277566	0.0061835	4.0234
1555.61	7.86	0.268	-0.553	8.585	0.1	0.213	0.15	4.00306	-4.58194	0.000632173	0.00277566	0.0061835	4.0234
1556.59	7.86	0.268	-0.553	8.59	0.1	0.213	0.15	4.00306	-4.58694	0.000632173	0.00277566	0.0061835	4.0234
1557.58	7.86	0.268	-0.552	8.59	0.1	0.213	0.15	4.00306	-4.58694	0.000632173	0.00278203	0.00619623	4.0234
1558.56	7.86	0.266	-0.552	8.59	0.1	0.213	0.15	4.00306	-4.58694	0.000612721	0.00278203	0.00617678	4.0234
1559.55	7.86	0.268	-0.552	8.595	0.1	0.213	0.15	4.00306	-4.59194	0.000632173	0.00278203	0.00619623	4.0234
1560.53	7.86	0.266	-0.551	8.595	0.1	0.213	0.15	4.00306	-4.59194	0.000612721	0.00278839	0.00618951	4.0234
1561.62	7.84	0.266	-0.551	8.595	0.1	0.213	0.15	3.99287	-4.60213	0.000612721	0.00278839	0.00618951	4.0234
1562.61	7.84	0.266	-0.551	8.6	0.1	0.213	0.15	3.99287	-4.60713	0.000612721	0.00278839	0.00618951	4.0234
1563.59	7.84	0.268	-0.55	8.6	0.1	0.213	0.15	3.99287	-4.60713	0.000632173	0.00279476	0.00622169	4.0234
1564.58	7.84	0.266	-0.55	8.6	0.1	0.213	0.15	3.99287	-4.60713	0.000612721	0.00279476	0.00620224	4.0234
1565.56	7.84	0.266	-0.55	8.6	0.1	0.213	0.15	3.99287	-4.60713	0.000612721	0.00279476	0.00620224	4.0234
1566.54	7.84	0.266	-0.55	8.6	0.1	0.213	0.15	3.99287	-4.60713	0.000612721	0.00279476	0.00620224	4.0234
1567.53	7.84	0.266	-0.549	8.6	0.1	0.213	0.15	3.99287	-4.60713	0.000612721	0.00280113	0.00621498	4.0234
1568.62	7.84	0.266	-0.549	8.6	0.1	0.213	0.15	3.99287	-4.60713	0.000612721	0.00280113	0.00621498	4.0234
1569.61	7.84	0.266	-0.549	8.6	0.1	0.213	0.15	3.99287	-4.60713	0.000612721	0.00280113	0.00621498	4.0234
1570.59	7.84	0.266	-0.549	8.6	0.1	0.213	0.15	3.99287	-4.60713	0.000612721	0.00280113	0.00621498	4.0234
1571.58	7.84	0.266	-0.549	8.6	0.1	0.213	0.15	3.99287	-4.60713	0.000612721	0.00280113	0.00621498	4.0234
1572.56	7.86	0.266	-0.548	8.6	0.1	0.213	0.15	4.00306	-4.59694	0.000612721	0.00280749	0.00622771	4.0234
1573.55	7.84	0.266	-0.548	8.595	0.1	0.213	0.15	3.99287	-4.60213	0.000612721	0.00280749	0.00622771	4.0234
1574.53	7.84	0.266	-0.548	8.6	0.1	0.213	0.15	3.99287	-4.60713	0.000612721	0.00280749	0.00622771	4.0234
1575.62	7.84	0.266	-0.548	8.6	0.1	0.213	0.15	3.99287	-4.60713	0.000612721	0.00280749	0.00622771	4.0234
1576.61	7.84	0.266	-0.548	8.6	0.1	0.213	0.15	3.99287	-4.60713	0.000612721	0.00280749	0.00622771	4.0234
1577.6	7.84	0.266	-0.548	8.6	0.1	0.213	0.15	3.99287	-4.60713	0.000612721	0.00280749	0.00622771	4.0234
1578.58	7.84	0.266	-0.547	8.6	0.1	0.213	0.15	3.99287	-4.60713	0.000612721	0.00281386	0.00624044	4.0234
1579.56	7.84	0.266	-0.547	8.595	0.1	0.213	0.15	3.99287	-4.60213	0.000612721	0.00281386	0.00624044	4.0234
1580.55	7.84	0.266	-0.547	8.6	0.1	0.213	0.15	3.99287	-4.60713	0.000612721	0.00281386	0.00624044	4.0234
1581.53	7.84	0.266	-0.547	8.6	0.1	0.213	0.15	3.99287	-4.60713	0.000612721	0.00281386	0.00624044	4.0234
1582.62	7.84	0.266	-0.547	8.6	0.1	0.213	0.15	3.99287	-4.60713	0.000612721	0.00281386	0.00624044	4.0234
1583.61	7.84	0.266	-0.547	8.6	0.1	0.213	0.15	3.99287	-4.60713	0.000612721	0.00281386	0.00624044	4.0234
1584.59	7.84	0.266	-0.546	8.6	0.1	0.213	0.15	3.99287	-4.60713	0.000612721	0.00282023	0.00625317	4.0234
1585.58	7.84	0.266	-0.546	8.6	0.1	0.213	0.15	3.99287	-4.60713	0.000612721	0.00282023	0.00625317	4.0234
1586.56	7.84	0.266	-0.546	8.6	0.1	0.213	0.15	3.99287	-4.60713	0.000612721	0.00282023	0.00625317	4.0234
1587.55	7.84	0.266	-0.546	8.6	0.1	0.213	0.15	3.99287	-4.60713	0.000612721	0.00282023	0.00625317	4.0234
1588.53	7.84	0.266	-0.546	8.6	0.1	0.213	0.15	3.99287	-4.60713	0.000612721	0.00282023	0.00625317	4.0234
1589.62	7.84	0.266	-0.546	8.6	0.1	0.213	0.15	3.99287	-4.60713	0.000612721	0.00282023	0.00625317	4.0234
1590.61	7.84	0.266	-0.546	8.6	0.1	0.213	0.15	3.99287	-4.60713	0.000612721	0.00282023	0.00625317	4.0234
1591.59	7.84	0.266	-0.546	8.6	0.1	0.213	0.15	3.99287	-4.60713	0.000612721	0.00282023	0.00625317	4.0234
1592.58	7.84	0.266	-0.545	8.6	0.1	0.213	0.15	3.99287	-4.60713	0.000612721	0.00282659	0.0062659	4.0234
1593.56	7.84	0.266	-0.545	8.595	0.1	0.213	0.15	3.99287	-4.60213	0.000612721	0.00282659	0.0062659	4.0234
1594.55	7.84	0.266	-0.545	8.6	0.1	0.213	0.15	3.99287	-4.60713	0.000612721	0.00282659	0.0062659	4.0234
1595.53	7.84	0.266	-0.545	8.6	0.1	0.213	0.15	3.99287	-4.60713	0.000612721	0.00282659	0.0062659	4.0234
1596.62	7.84	0.266	-0.545	8.6	0.1	0.213	0.15	3.99287	-4.60713	0.000612721	0.00282659	0.0062659	4.0234
1597.61	7.84	0.266	-0.545	8.6	0.1	0.213	0.15	3.99287	-4.60713	0.000612721	0.00282659	0.0062659	4.0234
1598.59	7.84	0.266	-0.545	8.6	0.1	0.213	0.15	3.99287	-4.60713	0.000612721	0.00282659	0.0062659	4.0234
1599.58	7.84	0.266	-0.545	8.6	0.1	0.213	0.15	3.99287	-4.60713	0.000612721	0.00282659	0.0062659	4.0234
1600.56	7.84	0.266	-0.545	8.6	0.1	0.213	0.15	3.99287	-4.60713	0.000612721	0.00282659	0.0062659	4.0234
1601.55	7.84	0.266	-0.545	8.6	0.1	0.213	0.15	3.99287	-4.60713	0.000612721	0.00282659	0.0062659	4.0234
1602.53	7.84	0.266	-0.544	8.6	0.1	0.213	0.15	3.99287	-4.60713	0.000612721	0.00283296	0.00627864	4.0234
1603.62	7.84	0.266	-0.544	8.6	0.1	0.213	0.15	3.99287	-4.60713	0.000612721	0.00283296	0.00627864	4.0234
1604.61	7.84	0.266	-0.544	8.6	0.1	0.213	0.15	3.99287	-4.60713	0.000612721	0.00283296	0.00627864	4.0234
1605.59	7.84	0.266	-0.544	8.6	0.1	0.213	0.15	3.99287	-4.60713	0.000612721	0.00283296	0.00627864	4.0234
1606.58	7.84	0.266	-0.544	8.6	0.1	0.213	0.15	3.99287	-4.60713	0.000612721	0.00283296	0.00627864	4.0234
1607.56	7.84	0.266	-0.544	8.6	0.1	0.213	0.15	3.99287	-4.60713	0.000612721	0.00283296	0.00627864	4.0234
1608.55	7.84	0.266	-0.544	8.6	0.1	0.213	0.15	3.99287	-4.60713	0.000612721	0.00283296	0.00627864	4.0234
1609.53	7.84	0.266	-0.544	8.6	0.1	0.213	0.15	3.99287	-4.60713	0.000612721	0.00283296	0.00627864	4.0234
1610.62	7.84	0.266	-0.544	8.6	0.1	0.213	0.15	3.99287	-4.60713	0.000612721	0.00283296	0.00627864	4.0234
1611.61	7.84	0.266	-0.544	8.6	0.1	0.213	0.15	3.99287	-4.60713	0.000612721	0.00283296	0.00627864	4.0234
1612.6	7.84	0.266	-0.544	8.6	0.1	0.213	0.15	3.99287	-4.60713	0.000612721	0.00283296	0.00627864	4.0234
1613.58	7.84	0.266	-0.543	8.6	0.1	0.213	0.15	3.99287	-4.60713	0.000612721	0.00283932	0.00629137	4.0234
1614.56	7.84	0.266	-0.543	8.6	0.1	0.213	0.15	3.99287	-4.60713	0.000612721	0.00283932	0.00629137	4.0234
1615.55	7.84	0.266	-0.543	8.6	0.1	0.213	0.15	3.99287	-4.60713	0.000612721	0.00283932	0.00629137	4.0234
1616.53	7.84	0.266	-0.543	8.605	0.1	0.213	0.15	3.99287	-4.61213	0.000612721	0.00283932	0.00629137	4.0234
1617.62	7.84	0.266	-0.543	8.6	0.1	0.213	0.15	3.99287	-4.60713	0.000612721	0.00283932	0.00629137	4.0234
1618.61	7.84	0.266	-0.543	8.595	0.1	0.213	0.15	3.99287	-4.60213	0.000612721	0.00283932	0.00629137	4.0234
1619.59	7.84	0.266	-0.543	8.595	0.1	0.213	0.15	3.99287	-4.60213	0.000612721	0.00283932	0.00629137	4.0234
1620.58	7.84	0.266	-0.543	8.6	0.1	0.213	0.15	3.99287	-4.60713	0.000612721	0.00283932	0.00629137	4.0234
1621.56	7.84	0.266	-0.543	8.6	0.1	0.213	0.15	3.99287	-4.60713	0.000612721	0.00283932	0.00629137	4.0234
1622.55	7.84	0.266	-0.543	8.6	0.1	0.213	0.15	3.99287	-4.60713	0.000612721	0.00283932	0.00629137	4.0234
1623.53	7.84	0.266	-0.543	8.6	0.1	0.213	0.15	3.99287	-4.60713	0.000612721	0.00283932	0.00629137	4.0234
1624.62	7.84	0.266	-0.543	8.6	0.1	0.213	0.15	3.99287	-4.60713	0.000612721	0.00283932	0.00629137	4.0234
1625.61	7.84	0.266	-0.542	8.6	0.1	0.213	0.15	3.99287	-4.60713	0.000612721	0.00284569	0.0063041	4.0234
1626.59	7.84	0.266	-0.542	8.6	0.1	0.213	0.15	3.99287	-4.60713	0.000612721	0.00284569	0.0063041	4.0234
1627.58	7.84	0.266	-0.542	8.6	0.1	0.213	0.15	3.99287	-4.60713	0.000612721	0.00284569	0.0063041	4.0234
1628.56	7.84	0.266	-0.542	8.6	0.1	0.213	0.15	3.99287	-4.60713	0.000612721	0.00284569	0.0063041	4.0234
1629.55	7.84	0.266	-0.542	8.6	0.1	0.213	0.15	3.99287	-4.60713	0.000612721	0.00284569	0.0063041	4.0234
1630.53	7.84	0.266	-0.542	8.6	0.1	0.213	0.15	3.99287	-4.60713	0.000612721	0.00284569	0.0063041	4.0234
1631.62	7.84	0.266	-0.542	8.6	0.1	0.213	0.15	3.99287	-4.60713	0.000612721	0.00284569	0.0063041	4.0234
1632.61	7.84	0.266	-0.542	8.6	0.1	0.213	0.15	3.99287	-4.60713	0.000612721	0.00284569	0.0063041	4.0234
1633.59	7.84	0.266	-0.542	8.6	0.1	0.213	0.145	3.99287	-4.60713	0.000612721	0.00284569	0.0063041	3.88929
1634.58	7.84	0.266	-0.542	8.6	0.1	0.213	0.15	3.99287	-4.60713	0.000612721	0.00284569	0.0063041	4.0234
1635.56	7.84	0.266	-0.542	8.6	0.1	0.213	0.15	3.99287	-4.60713	0.000612721	0.00284569	0.0063041	4.0234
1636.55	7.84	0.266	-0.542	8.6	0.1	0.213	0.15	3.99287	-4.60713	0.000612721	0.00284569	0.0063041	4.0234
1637.53	7.84	0.266	-0.542	8.6	0.1	0.213	0.15	3.99287	-4.60713	0.000612721	0.00284569	0.0063041	4.0234
1638.62	7.84	0.266	-0.542	8.6	0.1	0.213	0.15	3.99287	-4.60713	0.000612721	0.00284569	0.0063041	4.0234
1639.61	7.84	0.266	-0.541	8.6	0.1	0.213	0.15	3.99287	-4.60713	0.000612721	0.00285206	0.00631683	4.0234
1640.59	7.84	0.266	-0.541	8.6	0.1	0.213	0.15	3.99287	-4.60713	0.000612721	0.00285206	0.00631683	4.0234
1641.58	7.84	0.266	-0.541	8.6	0.1	0.213	0.15	3.99287	-4.60713	0.000612721	0.00285206	0.00631683	4.0234
1642.56	7.84	0.266	-0.541	8.6	0.1	0.213	0.15	3.99287	-4.60713	0.000612721	0.00285206	0.00631683	4.0234
1643.55	7.84	0.266	-0.541	8.6	0.1	0.213	0.15	3.99287	-4.60713	0.000612721	0.00285206	0.00631683	4.0234
1644.53	7.84	0.266	-0.541	8.6	0.1	0.213	0.15	3.99287	-4.60713	0.000612721	0.00285206	0.00631683	4.0234
1645.62	7.84	0.266	-0.541	8.6	0.1	0.213	0.15	3.99287	-4.60713	0.000612721	0.00285206	0.00631683	4.0234
1646.61	7.84	0.266	-0.541	8.6	0.1	0.213	0.15	3.99287	-4.60713	0.000612721	0.00285206	0.00631683	4.0234
1647.59	7.84	0.266	-0.541	8.6	0.1	0.213	0.15	3.99287	-4.60713	0.000612721	0.00285206	0.00631683	4.0234
1648.58	7.84	0.266	-0.541	8.6	0.1	0.213	0.15	3.99287	-4.60713	0.000612721	0.00285206	0.00631683	4.0234
1649.56	7.84	0.266	-0.541	8.6	0.1	0.213	0.15	3.99287	-4.60713	0.000612721	0.00285206	0.00631683	4.0234
1650.55	7.84	0.266	-0.541	8.6	0.1	0.213	0.15	3.99287	-4.60713	0.000612721	0.00285206	0.00631683	4.0234
1651.53	7.84	0.266	-0.541	8.6	0.1	0.213	0.145	3.99287	-4.60713	0.000612721	0.00285206	0.00631683	3.88929
1652.62	7.84	0.266	-0.541	8.6	0.1	0.213	0.145	3.99287	-4.60713	0.000612721	0.00285206	0.00631683	3.88929
1653.61	7.84	0.266	-0.541	8.6	0.1	0.213	0.145	3.99287	-4.60713	0.000612721	0.00285206	0.00631683	3.88929
1654.59	7.84	0.266	-0.541	8.6	0.1	0.213	0.145	3.99287	-4.60713	0.000612721	0.00285206	0.00631683	3.88929
1655.58	7.84	0.266	-0.541	8.6	0.1	0.213	0.145	3.99287	-4.60713	0.000612721	0.00285206	0.00631683	3.88929
1656.56	7.84	0.266	-0.54	8.6	0.1	0.213	0.145	3.99287	-4.60713	0.000612721	0.00285842	0.00632957	3.88929
1657.54	7.84	0.266	-0.54	8.6	0.1	0.213	0.145	3.99287	-4.60713	0.000612721	0.00285842	0.00632957	3.88929
1658.53	7.84	0.266	-0.54	8.6	0.1	0.213	0.145	3.99287	-4.60713	0.000612721	0.00285842	0.00632957	3.88929
1659.62	7.84	0.266	-0.54	8.6	0.1	0.213	0.145	3.99287	-4.60713	0.000612721	0.00285842	0.00632957	3.88929
1660.61	7.84	0.266	-0.54	8.6	0.1	0.213	0.145	3.99287	-4.60713	0.000612721	0.00285842	0.00632957	3.88929
1661.59	7.84	0.266	-0.54	8.6	0.1	0.213	0.145	3.99287	-4.60713	0.000612721	0.00285842	0.00632957	3.88929
1662.58	7.84	0.266	-0.54	8.6	0.1	0.213	0.145	3.99287	-4.60713	0.000612721	0.00285842	0.00632957	3.88929
1663.56	7.84	0.266	-0.54	8.6	0.1	0.213	0.145	3.99287	-4.60713	0.000612721	0.00285842	0.00632957	3.88929
1664.55	7.84	0.266	-0.54	8.6	0.1	0.213	0.145	3.99287	-4.60713	0.000612721	0.00285842	0.00632957	3.88929
1665.53	7.84	0.266	-0.54	8.6	0.1	0.213	0.145	3.99287	-4.60713	0.000612721	0.00285842	0.00632957	3.88929
1666.62	7.84	0.266	-0.54	8.6	0.1	0.213	0.145	3.99287	-4.60713	0.000612721	0.00285842	0.00632957	3.88929
1667.61	7.84	0.266	-0.54	8.6	0.1	0.213	0.145	3.99287	-4.60713	0.000612721	0.00285842	0.00632957	3.88929
1668.59	7.84	0.266	-0.54	8.6	0.1	0.213	0.145	3.99287	-4.60713	0.000612721	0.00285842	0.00632957	3.88929
1669.58	7.84	0.266	-0.54	8.6	0.1	0.213	0.145	3.99287	-4.60713	0.000612721	0.00285842	0.00632957	3.88929
1670.56	7.84	0.266	-0.54	8.6	0.1	0.213	0.145	3.99287	-4.60713	0.000612721	0.00285842	0.00632957	3.88929
1671.55	7.84	0.268	-0.54	8.6	0.1	0.213	0.15	3.99287	-4.60713	0.000632173	0.00285842	0.00634902	4.0234
1672.53	7.84	0.266	-0.54	8.6	0.1	0.213	0.145	3.99287	-4.60713	0.000612721	0.00285842	0.00632957	3.88929
1673.62	7.84	0.266	-0.539	8.6	0.1	0.213	0.145	3.99287	-4.60713	0.000612721	0.00286479	0.0063423	3.88929
1674.61	7.84	0.266	-0.539	8.6	0.1	0.213	0.145	3.99287	-4.60713	0.000612721	0.00286479	0.0063423	3.88929
1675.59	7.84	0.266	-0.539	8.6	0.1	0.213	0.145	3.99287	-4.60713	0.000612721	0.00286479	0.0063423	3.88929
1676.58	7.84	0.266	-0.539	8.6	0.1	0.213	0.145	3.99287	-4.60713	0.000612721	0.00286479	0.0063423	3.88929
1677.56	7.84	0.268	-0.539	8.6	0.1	0.213	0.145	3.99287	-4.60713	0.000632173	0.00286479	0.00636175	3.88929
1678.55	7.84	0.266	-0.539	8.6	0.1	0.213	0.145	3.99287	-4.60713	0.000612721	0.00286479	0.0063423	3.88929
1679.53	7.84	0.266	-0.539	8.6	0.1	0.213	0.145	3.99287	-4.60713	0.000612721	0.00286479	0.0063423	3.88929
1680.62	7.84	0.266	-0.539	8.6	0.1	0.213	0.145	3.99287	-4.60713	0.000612721	0.00286479	0.0063423	3.88929
1681.61	7.84	0.266	-0.539	8.6	0.1	0.213	0.145	3.99287	-4.60713	0.000612721	0.00286479	0.0063423	3.88929
1682.6	7.84	0.266	-0.539	8.6	0.1	0.213	0.145	3.99287	-4.60713	0.000612721	0.00286479	0.0063423	3.88929
1683.58	7.84	0.266	-0.539	8.6	0.1	0.213	0.145	3.99287	-4.60713	0.000612721	0.00286479	0.0063423	3.88929
1684.56	7.84	0.268	-0.539	8.6	0.1	0.213	0.145	3.99287	-4.60713	0.000632173	0.00286479	0.00636175	3.88929
1685.55	7.84	0.266	-0.539	8.6	0.1	0.213	0.145	3.99287	-4.60713	0.000612721	0.00286479	0.0063423	3.88929
1686.53	7.86	0.268	-0.539	8.6	0.1	0.213	0.145	4.00306	-4.59694	0.000632173	0.00286479	0.00636175	3.88929
1687.62	7.84	0.268	-0.539	8.59	0.1	0.213	0.145	3.99287	-4.59713	0.000632173	0.00286479	0.00636175	3.88929
1688.61	7.86	0.266	-0.539	8.56	0.1	0.213	0.145	4.00306	-4.55694	0.000612721	0.00286479	0.0063423	3.88929
1689.59	7.84	0.268	-0.539	8.515	0.1	0.213	0.145	3.99287	-4.52213	0.000632173	0.00286479	0.00636175	3.88929
1690.58	7.86	0.268	-0.539	8.46	0.1	0.213	0.145	4.00306	-4.45694	0.000632173	0.00286479	0.00636175	3.88929
1691.56	7.84	0.266	-0.539	8.4	0.1	0.213	0.145	3.99287	-4.40713	0.000612721	0.00286479	0.0063423	3.88929
1692.55	7.84	0.266	-0.54	8.35	0.1	0.213	0.145	3.99287	-4.35713	0.000612721	0.00285842	0.00632957	3.88929
1693.53	7.84	0.266	-0.54	8.3	0.1	0.213	0.145	3.99287	-4.30713	0.000612721	0.00285842	0.00632957	3.88929
1694.62	7.84	0.266	-0.54	8.245	0.1	0.213	0.145	3.99287	-4.25213	0.000612721	0.00285842	0.00632957	3.88929
1695.61	7.84	0.266	-0.541	8.195	0.1	0.213	0.145	3.99287	-4.20213	0.000612721	0.00285206	0.00631683	3.88929
1696.59	7.84	0.266	-0.541	8.145	0.1	0.213	0.145	3.99287	-4.15213	0.000612721	0.00285206	0.00631683	3.88929
1697.58	7.84	0.266	-0.541	8.095	0.1	0.213	0.145	3.99287	-4.10213	0.000612721	0.00285206	0.00631683	3.88929
1698.56	7.84	0.266	-0.541	8.045	0.1	0.213	0.145	3.99287	-4.05213	0.000612721	0.00285206	0.00631683	3.88929
1699.55	7.84	0.266	-0.542	7.995	0.1	0.213	0.145	3.99287	-4.00213	0.000612721	0.00284569	0.0063041	3.88929
1700.53	7.84	0.266	-0.542	7.95	0.1	0.213	0.145	3.99287	-3.95713	0.000612721	0.00284569	0.0063041	3.88929
1701.62	7.84	0.266	-0.542	7.895	0.1	0.213	0.145	3.99287	-3.90213	0.000612721	0.00284569	0.0063041	3.88929
1702.61	7.84	0.268	-0.543	7.845	0.1	0.213	0.145	3.99287	-3.85213	0.000632173	0.00283932	0.00631082	3.88929
1703.59	7.84	0.266	-0.543	7.795	0.1	0.213	0.145	3.99287	-3.80213	0.000612721	0.00283932	0.00629137	3.88929
1704.58	7.84	0.266	-0.543	7.74	0.1	0.213	0.145	3.99287	-3.74713	0.000612721	0.00283932	0.00629137	3.88929
1705.56	7.84	0.266	-0.544	7.695	0.1	0.213	0.145	3.99287	-3.70213	0.000612721	0.00283296	0.00627864	3.88929
1706.55	7.84	0.268	-0.544	7.645	0.1	0.213	0.145	3.99287	-3.65213	0.000632173	0.00283296	0.00629809	3.88929
1707.53	7.84	0.268	-0.544	7.595	0.1	0.213	0.145	3.99287	-3.60213	0.000632173	0.00283296	0.00629809	3.88929
1708.62	7.82	0.268	-0.545	7.54	0.1	0.213	0.145	3.98268	-3.55732	0.000632173	0.00282659	0.00628536	3.88929
1709.61	7.82	0.266	-0.545	7.49	0.1	0.213	0.15	3.98268	-3.50732	0.000612721	0.00282659	0.0062659	4.0234
1710.59	7.82	0.268	-0.545	7.445	0.1	0.213	0.15	3.98268	-3.46232	0.000632173	0.00282659	0.00628536	4.0234
1711.58	7.8	0.268	-0.546	7.39	0.1	0.213	0.15	3.9725	-3.4175	0.000632173	0.00282023	0.00627262	4.0234
1712.56	7.82	0.269	-0.546	7.345	0.1	0.213	0.145	3.98268	-3.36232	0.000641898	0.00282023	0.00628235	3.88929
1713.55	7.82	0.269	-0.547	7.295	0.1	0.213	0.15	3.98268	-3.31232	0.000641898	0.00281386	0.00626962	4.0234
1714.53	7.84	0.269	-0.547	7.245	0.1	0.213	0.145	3.99287	-3.25213	0.000641898	0.00281386	0.00626962	3.88929
1715.62	7.84	0.27	-0.547	7.195	0.1	0.213	0.145	3.99287	-3.20213	0.000651624	0.00281386	0.00627934	3.88929
1716.61	7.86	0.27	-0.548	7.145	0.1	0.213	0.15	4.00306	-3.14194	0.000651624	0.00280749	0.00626661	4.0234
1717.6	7.86	0.272	-0.548	7.095	0.1	0.213	0.145	4.00306	-3.09194	0.000671076	0.00280749	0.00628606	3.88929
1718.58	7.86	0.273	-0.549	7.045	0.1	0.213	0.15	4.00306	-3.04194	0.000680801	0.00280113	0.00628306	4.0234
1719.56	7.84	0.275	-0.549	6.995	0.1	0.213	0.15	3.99287	-3.00213	0.000700253	0.00280113	0.00630251	4.0234
1720.55	7.84	0.275	-0.55	6.945	0.1	0.213	0.15	3.99287	-2.95213	0.000700253	0.00279476	0.00628977	4.0234
1721.53	7.82	0.276	-0.55	6.895	0.1	0.213	0.15	3.98268	-2.91232	0.000709979	0.00279476	0.0062995	4.0234
1722.62	7.8	0.278	-0.55	6.84	0.1	0.213	0.15	3.9725	-2.8675	0.00072943	0.00279476	0.00631895	4.0234
1723.61	7.8	0.281	-0.551	6.79	0.1	0.213	0.15	3.9725	-2.8175	0.000758607	0.00278839	0.0063354	4.0234
1724.59	7.78	0.284	-0.551	6.74	0.1	0.213	0.15	3.96231	-2.77769	0.000787784	0.00278839	0.00636457	4.0234
1725.58	7.82	0.287	-0.552	6.69	0.1	0.213	0.15	3.98268	-2.70732	0.000816962	0.00278203	0.00638102	4.0234
1726.56	7.86	0.288	-0.552	6.64	0.1	0.213	0.15	4.00306	-2.63694	0.000826687	0.00278203	0.00639074	4.0234
1727.55	7.86	0.288	-0.553	6.595	0.1	0.213	0.15	4.00306	-2.59194	0.000826687	0.00277566	0.00637801	4.0234
1728.53	7.88	0.29	-0.553	6.545	0.1	0.213	0.15	4.01324	-2.53176	0.000846139	0.00277566	0.00639746	4.0234
1729.62	7.88	0.29	-0.554	6.49	0.1	0.213	0.15	4.01324	-2.47676	0.000846139	0.0027693	0.00638473	4.0234
1730.61	7.88	0.29	-0.554	6.445	0.1	0.213	0.15	4.01324	-2.43176	0.000846139	0.0027693	0.00638473	4.0234
1731.59	7.88	0.29	-0.555	6.39	0.1	0.213	0.15	4.01324	-2.37676	0.000846139	0.00276293	0.006372	4.0234
1732.58	7.86	0.29	-0.555	6.345	0.1	0.213	0.15	4.00306	-2.34194	0.000846139	0.00276293	0.006372	4.0234
1733.56	7.86	0.29	-0.556	6.3	0.1	0.213	0.15	4.00306	-2.29694	0.000846139	0.00275656	0.00635927	4.0234
1734.55	7.86	0.29	-0.556	6.245	0.1	0.213	0.15	4.00306	-2.24194	0.000846139	0.00275656	0.00635927	4.0234
1735.53	7.86	0.291	-0.557	6.19	0.1	0.213	0.15	4.00306	-2.18694	0.000855865	0.0027502	0.00635626	4.0234
1736.62	7.86	0.291	-0.558	6.145	0.1	0.213	0.15	4.00306	-2.14194	0.000855865	0.00274383	0.00634353	4.0234
1737.61	7.86	0.291	-0.558	6.095	0.1	0.213	0.15	4.00306	-2.09194	0.000855865	0.00274383	0.00634353	4.0234
1738.59	7.86	0.291	-0.559	6.04	0.1	0.213	0.15	4.00306	-2.03694	0.000855865	0.00273747	0.00633079	4.0234
1739.58	7.86	0.291	-0.559	5.99	0.1	0.213	0.15	4.00306	-1.98694	0.000855865	0.00273747	0.00633079	4.0234
1740.56	7.86	0.291	-0.56	5.945	0.1	0.213	0.15	4.00306	-1.94194	0.000855865	0.0027311	0.00631806	4.0234
1741.55	7.86	0.291	-0.56	5.895	0.1	0.213	0.15	4.00306	-1.89194	0.000855865	0.0027311	0.00631806	4.0234
1742.53	7.86	0.293	-0.561	5.85	0.1	0.213	0.15	4.00306	-1.84694	0.000875316	0.00272473	0.00632478	4.0234
1743.62	7.84	0.293	-0.562	5.795	0.1	0.213	0.15	3.99287	-1.80213	0.000875316	0.00271837	0.00631205	4.0234
1744.61	7.84	0.293	-0.562	5.745	0.1	0.213	0.15	3.99287	-1.75213	0.000875316	0.00271837	0.00631205	4.0234
1745.59	7.86	0.293	-0.563	5.695	0.1	0.213	0.15	4.00306	-1.69194	0.000875316	0.002712	0.00629932	4.0234
1746.58	7.84	0.293	-0.564	5.64	0.1	0.213	0.15	3.99287	-1.64713	0.000875316	0.00270563	0.00628658	4.0234
1747.56	7.86	0.294	-0.564	5.595	0.1	0.213	0.15	4.00306	-1.59194	0.000885042	0.00270563	0.00629631	4.0234
1748.54	7.86	0.293	-0.565	5.545	0.1	0.213	0.15	4.00306	-1.54194	0.000875316	0.00269927	0.00627385	4.0234
1749.53	7.84	0.294	-0.566	5.495	0.1	0.213	0.15	3.99287	-1.50213	0.000885042	0.0026929	0.00627085	4.0234
1750.62	7.84	0.294	-0.567	5.44	0.1	0.213	0.15	3.99287	-1.44713	0.000885042	0.00268654	0.00625811	4.0234
1751.61	7.84	0.294	-0.567	5.39	0.1	0.213	0.15	3.99287	-1.39713	0.000885042	0.00268654	0.00625811	4.0234
1752.59	7.86	0.294	-0.568	5.34	0.1	0.213	0.15	4.00306	-1.33694	0.000885042	0.00268017	0.00624538	4.0234
1753.58	7.84	0.294	-0.569	5.29	0.1	0.213	0.15	3.99287	-1.29713	0.000885042	0.0026738	0.00623265	4.0234
1754.56	7.86	0.295	-0.569	5.25	0.1	0.213	0.15	4.00306	-1.24694	0.000894768	0.0026738	0.00624237	4.0234
1755.55	7.86	0.295	-0.57	5.2	0.1	0.213	0.15	4.00306	-1.19694	0.000894768	0.00266744	0.00622964	4.0234
1756.53	7.86	0.295	-0.571	5.15	0.1	0.213	0.15	4.00306	-1.14694	0.000894768	0.00266107	0.00621691	4.0234
1757.62	7.86	0.295	-0.572	5.095	0.1	0.213	0.15	4.00306	-1.09194	0.000894768	0.0026547	0.00620418	4.0234
1758.61	7.86	0.295	-0.572	5.045	0.1	0.213	0.15	4.00306	-1.04194	0.000894768	0.0026547	0.00620418	4.0234
1759.59	7.86	0.295	-0.573	4.99	0.1	0.213	0.15	4.00306	-0.986944	0.000894768	0.00264834	0.00619144	4.0234
1760.58	7.86	0.295	-0.574	4.94	0.1	0.213	0.15	4.00306	-0.936944	0.000894768	0.00264197	0.00617871	4.0234
1761.56	7.86	0.297	-0.575	4.895	0.1	0.213	0.15	4.00306	-0.891944	0.000914219	0.00263561	0.00618543	4.0234
1762.55	7.86	0.297	-0.576	4.85	0.1	0.213	0.15	4.00306	-0.846944	0.000914219	0.00262924	0.0061727	4.0234
1763.53	7.86	0.297	-0.576	4.795	0.1	0.213	0.15	4.00306	-0.791944	0.000914219	0.00262924	0.0061727	4.0234
1764.62	7.86	0.297	-0.577	4.74	0.1	0.213	0.15	4.00306	-0.736944	0.000914219	0.00262287	0.00615997	4.0234
1765.61	7.84	0.297	-0.578	4.695	0.1	0.213	0.15	3.99287	-0.70213	0.000914219	0.00261651	0.00614723	4.0234
1766.59	7.84	0.297	-0.579	4.64	0.1	0.213	0.15	3.99287	-0.64713	0.000914219	0.00261014	0.0061345	4.0234
1767.58	7.84	0.297	-0.58	4.59	0.1	0.213	0.15	3.99287	-0.59713	0.000914219	0.00260377	0.00612177	4.0234
1768.56	7.84	0.297	-0.581	4.545	0.1	0.213	0.15	3.99287	-0.55213	0.000914219	0.00259741	0.00610904	4.0234
1769.55	7.84	0.298	-0.582	4.495	0.1	0.213	0.15	3.99287	-0.50213	0.000923945	0.00259104	0.00610603	4.0234
1770.53	7.84	0.298	-0.583	4.445	0.1	0.213	0.15	3.99287	-0.45213	0.000923945	0.00258468	0.0060933	4.0234
1771.62	7.84	0.298	-0.584	4.39	0.1	0.213	0.15	3.99287	-0.39713	0.000923945	0.00257831	0.00608056	4.0234
1772.61	7.84	0.298	-0.584	4.34	0.1	0.213	0.15	3.99287	-0.34713	0.000923945	0.00257831	0.00608056	4.0234
1773.59	7.84	0.298	-0.585	4.29	0.1	0.213	0.15	3.99287	-0.29713	0.000923945	0.00257194	0.00606783	4.0234
1774.58	7.84	0.3	-0.586	4.24	0.1	0.213	0.15	3.99287	-0.24713	0.000943396	0.00256558	0.00607455	4.0234
1775.56	7.84	0.3	-0.587	4.195	0.1	0.213	0.15	3.99287	-0.20213	0.000943396	0.00255921	0.00606182	4.0234
1776.55	7.86	0.3	-0.588	4.15	0.1	0.213	0.15	4.00306	-0.146944	0.000943396	0.00255285	0.00604909	4.0234
1777.53	7.84	0.301	-0.589	4.1	0.1	0.213	0.15	3.99287	-0.10713	0.000953122	0.00254648	0.00604608	4.0234
1778.62	7.84	0.301	-0.59	4.045	0.1	0.213	0.15	3.99287	-0.0521301	0.000953122	0.00254011	0.00603335	4.0234
1779.61	7.84	0.301	-0.591	3.99	0.1	0.213	0.15	3.99287	0.00286988	0.000953122	0.00253375	0.00602062	4.0234
1780.59	7.84	0.301	-0.592	3.94	0.1	0.213	0.15	3.99287	0.0528699	0.000953122	0.00252738	0.00600788	4.0234
1781.58	7.84	0.301	-0.594	3.89	0.1	0.213	0.15	3.99287	0.10287	0.000953122	0.00251465	0.00598242	4.0234
1782.56	7.86	0.303	-0.595	3.85	0.1	0.213	0.15	4.00306	0.153056	0.000972573	0.00250828	0.00598914	4.0234
1783.55	7.84	0.303	-0.596	3.8	0.1	0.213	0.15	3.99287	0.19287	0.000972573	0.00250192	0.0059764	4.0234
1784.53	7.84	0.303	-0.597	3.745	0.1	0.213	0.15	3.99287	0.24787	0.000972573	0.00249555	0.00596367	4.0234
1785.62	7.84	0.304	-0.598	3.695	0.1	0.213	0.15	3.99287	0.29787	0.000982299	0.00248918	0.00596067	4.0234
1786.61	7.84	0.304	-0.599	3.64	0.1	0.213	0.15	3.99287	0.35287	0.000982299	0.00248282	0.00594793	4.0234
1787.6	7.84	0.304	-0.601	3.595	0.1	0.213	0.15	3.99287	0.39787	0.000982299	0.00247008	0.00592247	4.0234
1788.58	7.84	0.304	-0.602	3.54	0.1	0.213	0.15	3.99287	0.45287	0.000982299	0.00246372	0.00590974	4.0234
1789.56	7.84	0.306	-0.603	3.495	0.1	0.213	0.15	3.99287	0.49787	0.00100175	0.00245735	0.00591646	4.0234
1790.55	7.84	0.306	-0.604	3.445	0.1	0.213	0.15	3.99287	0.54787	0.00100175	0.00245099	0.00590372	4.0234
1791.53	7.84	0.306	-0.606	3.4	0.1	0.213	0.15	3.99287	0.59287	0.00100175	0.00243825	0.00587826	4.0234
1792.62	7.84	0.307	-0.607	3.34	0.1	0.213	0.15	3.99287	0.65287	0.00101148	0.00243189	0.00587525	4.0234
1793.61	7.84	0.307	-0.608	3.295	0.1	0.213	0.15	3.99287	0.69787	0.00101148	0.00242552	0.00586252	4.0234
1794.59	7.84	0.307	-0.61	3.24	0.1	0.213	0.15	3.99287	0.75287	0.00101148	0.00241279	0.00583705	4.0234
1795.58	7.84	0.309	-0.611	3.19	0.1	0.213	0.15	3.99287	0.80287	0.00103093	0.00240642	0.00584377	4.0234
1796.56	7.84	0.309	-0.613	3.145	0.1	0.213	0.155	3.99287	0.84787	0.00103093	0.00239369	0.00581831	4.15752
1797.55	7.84	0.309	-0.614	3.095	0.1	0.213	0.15	3.99287	0.89787	0.00103093	0.00238732	0.00580558	4.0234
1798.53	7.84	0.31	-0.616	3.05	0.1	0.213	0.15	3.99287	0.94287	0.00104065	0.00237459	0.00578984	4.0234
1799.62	7.84	0.31	-0.617	2.995	0.1	0.213	0.15	3.99287	0.99787	0.00104065	0.00236823	0.0057771	4.0234
1800.61	7.84	0.31	-0.619	2.94	0.1	0.213	0.15	3.99287	1.05287	0.00104065	0.00235549	0.00575164	4.0234
1801.59	7.84	0.31	-0.62	2.89	0.1	0.213	0.15	3.99287	1.10287	0.00104065	0.00234913	0.00573891	4.0234
1802.58	7.84	0.312	-0.622	2.84	0.1	0.213	0.15	3.99287	1.15287	0.00106011	0.00233639	0.00573289	4.0234
1803.56	7.84	0.312	-0.623	2.795	0.1	0.213	0.15	3.99287	1.19787	0.00106011	0.00233003	0.00572016	4.0234
1804.55	7.84	0.313	-0.625	2.745	0.1	0.213	0.15	3.99287	1.24787	0.00106983	0.0023173	0.00570442	4.0234
1805.53	7.84	0.313	-0.626	2.695	0.1	0.213	0.15	3.99287	1.29787	0.00106983	0.00231093	0.00569169	4.0234
1806.62	7.84	0.315	-0.628	2.64	0.1	0.213	0.15	3.99287	1.35287	0.00108928	0.0022982	0.00568568	4.0234
1807.61	7.84	0.315	-0.629	2.59	0.1	0.213	0.15	3.99287	1.40287	0.00108928	0.00229183	0.00567294	4.0234
1808.59	7.84	0.315	-0.631	2.54	0.1	0.213	0.15	3.99287	1.45287	0.00108928	0.0022791	0.00564748	4.0234
1809.58	7.84	0.316	-0.632	2.495	0.1	0.213	0.155	3.99287	1.49787	0.00109901	0.00227273	0.00564447	4.15752
1810.56	7.84	0.316	-0.634	2.46	0.1	0.213	0.15	3.99287	1.53287	0.00109901	0.00226	0.00561901	4.0234
1811.55	7.84	0.317	-0.636	2.415	0.1	0.213	0.15	3.99287	1.57787	0.00110873	0.00224727	0.00560327	4.0234
1812.53	7.84	0.317	-0.638	2.36	0.1	0.213	0.155	3.99287	1.63287	0.00110873	0.00223454	0.0055778	4.15752
1813.62	7.84	0.319	-0.642	2.3	0.1	0.213	0.155	3.99287	1.69287	0.00112819	0.00220907	0.00554633	4.15752
1814.61	7.84	0.32	-0.645	2.245	0.1	0.213	0.155	3.99287	1.74787	0.00113791	0.00218997	0.00551785	4.15752
1815.59	7.84	0.32	-0.648	2.195	0.1	0.213	0.155	3.99287	1.79787	0.00113791	0.00217087	0.00547966	4.15752
1816.58	7.84	0.322	-0.651	2.145	0.1	0.213	0.155	3.99287	1.84787	0.00115736	0.00215177	0.00546091	4.15752
1817.56	7.88	0.323	-0.652	2.19	0.1	0.213	0.155	4.01324	1.82324	0.00116709	0.00214541	0.00545791	4.15752
1818.55	7.88	0.323	-0.652	2.195	0.1	0.213	0.155	4.01324	1.81824	0.00116709	0.00214541	0.00545791	4.15752
1819.53	7.88	0.323	-0.652	2.235	0.1	0.213	0.155	4.01324	1.77824	0.00116709	0.00214541	0.00545791	4.15752
1820.62	7.88	0.323	-0.652	2.24	0.1	0.213	0.155	4.01324	1.77324	0.00116709	0.00214541	0.00545791	4.15752
1821.61	7.88	0.322	-0.652	2.22	0.1	0.213	0.155	4.01324	1.79324	0.00115736	0.00214541	0.00544818	4.15752
1822.6	7.86	0.322	-0.652	2.19	0.1	0.213	0.155	4.00306	1.81306	0.00115736	0.00214541	0.00544818	4.15752
1823.58	7.86	0.323	-0.653	2.16	0.1	0.213	0.155	4.00306	1.84306	0.00116709	0.00213904	0.00544517	4.15752
1824.56	7.86	0.323	-0.654	2.14	0.1	0.213	0.155	4.00306	1.86306	0.00116709	0.00213268	0.00543244	4.15752
1825.55	7.84	0.323	-0.655	2.12	0.1	0.213	0.155	3.99287	1.87287	0.00116709	0.00212631	0.00541971	4.15752
1826.53	7.84	0.323	-0.655	2.105	0.1	0.213	0.155	3.99287	1.88787	0.00116709	0.00212631	0.00541971	4.15752
1827.62	7.84	0.323	-0.656	2.095	0.1	0.213	0.155	3.99287	1.89787	0.00116709	0.00211994	0.00540698	4.15752
1828.61	7.84	0.325	-0.657	2.085	0.1	0.213	0.155	3.99287	1.90787	0.00118654	0.00211358	0.00541369	4.15752
1829.59	7.84	0.325	-0.658	2.075	0.1	0.213	0.155	3.99287	1.91787	0.00118654	0.00210721	0.00540096	4.15752
1830.58	7.84	0.323	-0.658	2.07	0.1	0.213	0.155	3.99287	1.92287	0.00116709	0.00210721	0.00538151	4.15752
1831.56	7.84	0.325	-0.659	2.06	0.1	0.213	0.155	3.99287	1.93287	0.00118654	0.00210085	0.00538823	4.15752
1832.55	7.84	0.325	-0.659	2.055	0.1	0.213	0.155	3.99287	1.93787	0.00118654	0.00210085	0.00538823	4.15752
1833.53	7.84	0.325	-0.659	2.05	0.1	0.213	0.155	3.99287	1.94287	0.00118654	0.00210085	0.00538823	4.15752
1834.62	7.84	0.325	-0.66	2.045	0.1	0.213	0.155	3.99287	1.94787	0.00118654	0.00209448	0.0053755	4.15752
1835.61	7.84	0.325	-0.66	2.04	0.1	0.213	0.155	3.99287	1.95287	0.00118654	0.00209448	0.0053755	4.15752
1836.59	7.84	0.325	-0.661	2.035	0.1	0.213	0.155	3.99287	1.95787	0.00118654	0.00208811	0.00536277	4.15752
1837.58	7.84	0.325	-0.661	2.03	0.1	0.213	0.15	3.99287	1.96287	0.00118654	0.00208811	0.00536277	4.0234
1838.56	7.84	0.326	-0.661	2.025	0.1	0.213	0.15	3.99287	1.96787	0.00119627	0.00208811	0.00537249	4.0234
1839.55	7.84	0.326	-0.662	2.02	0.1	0.213	0.155	3.99287	1.97287	0.00119627	0.00208175	0.00535976	4.15752
1840.53	7.84	0.326	-0.662	2.015	0.1	0.213	0.15	3.99287	1.97787	0.00119627	0.00208175	0.00535976	4.0234
1841.62	7.84	0.326	-0.662	2.015	0.1	0.213	0.15	3.99287	1.97787	0.00119627	0.00208175	0.00535976	4.0234
1842.61	7.84	0.326	-0.662	2.01	0.1	0.213	0.15	3.99287	1.98287	0.00119627	0.00208175	0.00535976	4.0234
1843.59	7.84	0.326	-0.663	2.01	0.1	0.213	0.15	3.99287	1.98287	0.00119627	0.00207538	0.00534703	4.0234
1844.58	7.84	0.326	-0.663	2.005	0.1	0.213	0.15	3.99287	1.98787	0.00119627	0.00207538	0.00534703	4.0234
1845.56	7.86	0.326	-0.663	2.005	0.1	0.213	0.15	4.00306	1.99806	0.00119627	0.00207538	0.00534703	4.0234
1846.55	7.84	0.326	-0.663	2	0.1	0.213	0.15	3.99287	1.99287	0.00119627	0.00207538	0.00534703	4.0234
1847.53	7.84	0.326	-0.663	2	0.1	0.213	0.15	3.99287	1.99287	0.00119627	0.00207538	0.00534703	4.0234
1848.62	7.84	0.328	-0.664	2	0.1	0.213	0.15	3.99287	1.99287	0.00121572	0.00206901	0.00535375	4.0234
1849.61	7.84	0.326	-0.664	2	0.1	0.213	0.15	3.99287	1.99287	0.00119627	0.00206901	0.00533429	4.0234
1850.59	7.84	0.328	-0.664	2	0.1	0.213	0.15	3.99287	1.99287	0.00121572	0.00206901	0.00535375	4.0234
1851.58	7.84	0.326	-0.664	2	0.1	0.213	0.155	3.99287	1.99287	0.00119627	0.00206901	0.00533429	4.15752
1852.56	7.84	0.328	-0.664	2	0.1	0.213	0.155	3.99287	1.99287	0.00121572	0.00206901	0.00535375	4.15752
1853.55	7.84	0.328	-0.664	2	0.1	0.213	0.155	3.99287	1.99287	0.00121572	0.00206901	0.00535375	4.15752
1854.53	7.84	0.326	-0.664	2	0.1	0.213	0.15	3.99287	1.99287	0.00119627	0.00206901	0.00533429	4.0234
1855.62	7.84	0.326	-0.664	2	0.1	0.213	0.155	3.99287	1.99287	0.00119627	0.00206901	0.00533429	4.15752
1856.61	7.84	0.328	-0.664	2	0.1	0.213	0.155	3.99287	1.99287	0.00121572	0.00206901	0.00535375	4.15752
1857.59	7.84	0.328	-0.664	2	0.1	0.213	0.155	3.99287	1.99287	0.00121572	0.00206901	0.00535375	4.15752
1858.58	7.84	0.328	-0.664	2	0.1	0.213	0.155	3.99287	1.99287	0.00121572	0.00206901	0.00535375	4.15752
1859.56	7.84	0.328	-0.664	2	0.1	0.213	0.155	3.99287	1.99287	0.00121572	0.00206901	0.00535375	4.15752
1860.55	7.84	0.328	-0.665	2	0.1	0.213	0.155	3.99287	1.99287	0.00121572	0.00206265	0.00534101	4.15752
1861.53	7.84	0.328	-0.665	2	0.1	0.213	0.155	3.99287	1.99287	0.00121572	0.00206265	0.00534101	4.15752
1862.62	7.84	0.328	-0.665	2	0.1	0.213	0.155	3.99287	1.99287	0.00121572	0.00206265	0.00534101	4.15752
1863.61	7.84	0.328	-0.665	2	0.1	0.213	0.155	3.99287	1.99287	0.00121572	0.00206265	0.00534101	4.15752
1864.59	7.84	0.328	-0.665	2	0.1	0.213	0.155	3.99287	1.99287	0.00121572	0.00206265	0.00534101	4.15752
1865.58	7.84	0.328	-0.665	2	0.1	0.213	0.155	3.99287	1.99287	0.00121572	0.00206265	0.00534101	4.15752
1866.56	7.84	0.328	-0.665	2	0.1	0.213	0.15	3.99287	1.99287	0.00121572	0.00206265	0.00534101	4.0234
1867.55	7.84	0.328	-0.665	2	0.1	0.213	0.155	3.99287	1.99287	0.00121572	0.00206265	0.00534101	4.15752
1868.53	7.84	0.328	-0.665	2	0.1	0.213	0.155	3.99287	1.99287	0.00121572	0.00206265	0.00534101	4.15752
1869.62	7.84	0.328	-0.665	2	0.1	0.213	0.15	3.99287	1.99287	0.00121572	0.00206265	0.00534101	4.0234
1870.61	7.84	0.328	-0.665	2	0.1	0.213	0.155	3.99287	1.99287	0.00121572	0.00206265	0.00534101	4.15752
1871.59	7.84	0.328	-0.665	2	0.1	0.213	0.155	3.99287	1.99287	0.00121572	0.00206265	0.00534101	4.15752
1872.58	7.84	0.328	-0.665	2	0.1	0.213	0.15	3.99287	1.99287	0.00121572	0.00206265	0.00534101	4.0234
1873.56	7.84	0.328	-0.665	2	0.1	0.213	0.155	3.99287	1.99287	0.00121572	0.00206265	0.00534101	4.15752
1874.55	7.84	0.328	-0.665	2	0.1	0.213	0.155	3.99287	1.99287	0.00121572	0.00206265	0.00534101	4.15752
1875.53	7.84	0.328	-0.665	2	0.1	0.213	0.155	3.99287	1.99287	0.00121572	0.00206265	0.00534101	4.15752
1876.62	7.84	0.328	-0.665	2	0.1	0.213	0.15	3.99287	1.99287	0.00121572	0.00206265	0.00534101	4.0234
1877.61	7.84	0.328	-0.665	2	0.1	0.213	0.15	3.99287	1.99287	0.00121572	0.00206265	0.00534101	4.0234
1878.59	7.84	0.328	-0.665	2	0.1	0.213	0.15	3.99287	1.99287	0.00121572	0.00206265	0.00534101	4.0234
1879.58	7.84	0.328	-0.665	2	0.1	0.213	0.15	3.99287	1.99287	0.00121572	0.00206265	0.00534101	4.0234
1880.56	7.84	0.328	-0.665	2	0.1	0.213	0.155	3.99287	1.99287	0.00121572	0.00206265	0.00534101	4.15752
1881.55	7.84	0.328	-0.665	2	0.1	0.213	0.15	3.99287	1.99287	0.00121572	0.00206265	0.00534101	4.0234
1882.53	7.84	0.328	-0.665	2	0.1	0.213	0.15	3.99287	1.99287	0.00121572	0.00206265	0.00534101	4.0234
1883.62	7.84	0.328	-0.665	2	0.1	0.213	0.155	3.99287	1.99287	0.00121572	0.00206265	0.00534101	4.15752
1884.61	7.84	0.328	-0.665	2	0.1	0.213	0.15	3.99287	1.99287	0.00121572	0.00206265	0.00534101	4.0234
1885.59	7.84	0.328	-0.665	2	0.1	0.213	0.15	3.99287	1.99287	0.00121572	0.00206265	0.00534101	4.0234
1886.58	7.84	0.328	-0.665	2	0.1	0.213	0.15	3.99287	1.99287	0.00121572	0.00206265	0.00534101	4.0234
1887.56	7.84	0.328	-0.665	2	0.1	0.213	0.15	3.99287	1.99287	0.00121572	0.00206265	0.00534101	4.0234
1888.55	7.84	0.328	-0.665	2	0.1	0.213	0.155	3.99287	1.99287	0.00121572	0.00206265	0.00534101	4.15752
1889.53	7.84	0.328	-0.665	2	0.1	0.213	0.15	3.99287	1.99287	0.00121572	0.00206265	0.00534101	4.0234
1890.62	7.84	0.328	-0.665	2	0.1	0.213	0.15	3.99287	1.99287	0.00121572	0.00206265	0.00534101	4.0234
1891.61	7.84	0.329	-0.665	2	0.1	0.213	0.15	3.99287	1.99287	0.00122544	0.00206265	0.00535074	4.0234
1892.6	7.84	0.328	-0.665	2	0.1	0.213	0.15	3.99287	1.99287	0.00121572	0.00206265	0.00534101	4.0234
1893.58	7.84	0.328	-0.665	2	0.1	0.213	0.15	3.99287	1.99287	0.00121572	0.00206265	0.00534101	4.0234
1894.56	7.84	0.329	-0.665	2	0.1	0.213	0.15	3.99287	1.99287	0.00122544	0.00206265	0.00535074	4.0234
1895.55	7.84	0.328	-0.665	2	0.1	0.213	0.15	3.99287	1.99287	0.00121572	0.00206265	0.00534101	4.0234
1896.53	7.84	0.328	-0.665	2	0.1	0.213	0.15	3.99287	1.99287	0.00121572	0.00206265	0.00534101	4.0234
1897.62	7.84	0.328	-0.665	2	0.1	0.213	0.15	3.99287	1.99287	0.00121572	0.00206265	0.00534101	4.0234
1898.61	7.84	0.328	-0.665	2	0.1	0.213	0.15	3.99287	1.99287	0.00121572	0.00206265	0.00534101	4.0234
1899.59	7.84	0.328	-0.665	2	0.1	0.213	0.15	3.99287	1.99287	0.00121572	0.00206265	0.00534101	4.0234
1900.58	7.84	0.328	-0.665	2	0.1	0.213	0.15	3.99287	1.99287	0.00121572	0.00206265	0.00534101	4.0234
1901.56	7.84	0.328	-0.665	2	0.1	0.213	0.15	3.99287	1.99287	0.00121572	0.00206265	0.00534101	4.0234
1902.55	7.84	0.328	-0.665	2	0.1	0.213	0.15	3.99287	1.99287	0.00121572	0.00206265	0.00534101	4.0234
1903.53	7.84	0.328	-0.665	2	0.1	0.213	0.15	3.99287	1.99287	0.00121572	0.00206265	0.00534101	4.0234
1904.62	7.84	0.328	-0.665	2	0.1	0.213	0.15	3.99287	1.99287	0.00121572	0.00206265	0.00534101	4.0234
1905.61	7.84	0.328	-0.665	2	0.1	0.213	0.15	3.99287	1.99287	0.00121572	0.00206265	0.00534101	4.0234
1906.59	7.84	0.328	-0.665	2	0.1	0.213	0.15	3.99287	1.99287	0.00121572	0.00206265	0.00534101	4.0234
1907.58	7.84	0.328	-0.665	2	0.1	0.213	0.15	3.99287	1.99287	0.00121572	0.00206265	0.00534101	4.0234
1908.56	7.84	0.328	-0.665	2	0.1	0.213	0.15	3.99287	1.99287	0.00121572	0.00206265	0.00534101	4.0234
1909.55	7.84	0.328	-0.665	2	0.1	0.213	0.15	3.99287	1.99287	0.00121572	0.00206265	0.00534101	4.0234
1910.53	7.84	0.328	-0.665	2	0.1	0.213	0.15	3.99287	1.99287	0.00121572	0.00206265	0.00534101	4.0234
1911.62	7.84	0.328	-0.665	2	0.1	0.213	0.15	3.99287	1.99287	0.00121572	0.00206265	0.00534101	4.0234
1912.61	7.84	0.328	-0.665	2	0.1	0.213	0.15	3.99287	1.99287	0.00121572	0.00206265	0.00534101	4.0234
1913.59	7.84	0.328	-0.665	2	0.1	0.213	0.155	3.99287	1.99287	0.00121572	0.00206265	0.00534101	4.15752
1914.58	7.84	0.328	-0.665	2	0.1	0.213	0.15	3.99287	1.99287	0.00121572	0.00206265	0.00534101	4.0234
1915.56	7.84	0.328	-0.665	2	0.1	0.213	0.155	3.99287	1.99287	0.00121572	0.00206265	0.00534101	4.15752
1916.54	7.84	0.328	-0.665	2	0.1	0.213	0.155	3.99287	1.99287	0.00121572	0.00206265	0.00534101	4.15752
1917.53	7.84	0.328	-0.665	2	0.1	0.213	0.15	3.99287	1.99287	0.00121572	0.00206265	0.00534101	4.0234
1918.62	7.84	0.328	-0.665	2	0.1	0.213	0.155	3.99287	1.99287	0.00121572	0.00206265	0.00534101	4.15752
1919.61	7.84	0.328	-0.665	2	0.1	0.213	0.155	3.99287	1.99287	0.00121572	0.00206265	0.00534101	4.15752
1920.59	7.84	0.328	-0.665	2	0.1	0.213	0.155	3.99287	1.99287	0.00121572	0.00206265	0.00534101	4.15752
1921.58	7.84	0.328	-0.665	2	0.1	0.213	0.155	3.99287	1.99287	0.00121572	0.00206265	0.00534101	4.15752
1922.56	7.84	0.328	-0.665	2	0.1	0.213	0.155	3.99287	1.99287	0.00121572	0.00206265	0.00534101	4.15752
1923.55	7.84	0.328	-0.665	2	0.1	0.213	0.155	3.99287	1.99287	0.00121572	0.00206265	0.00534101	4.15752
1924.53	7.84	0.328	-0.665	2	0.1	0.213	0.155	3.99287	1.99287	0.00121572	0.00206265	0.00534101	4.15752
1925.62	7.84	0.328	-0.665	2.005	0.1	0.213	0.155	3.99287	1.98787	0.00121572	0.00206265	0.00534101	4.15752
1926.61	7.84	0.328	-0.665	2	0.1	0.213	0.155	3.99287	1.99287	0.00121572	0.00206265	0.00534101	4.15752
1927.6	7.84	0.328	-0.665	2	0.1	0.213	0.155	3.99287	1.99287	0.00121572	0.00206265	0.00534101	4.15752
1928.58	7.84	0.328	-0.665	2	0.1	0.213	0.155	3.99287	1.99287	0.00121572	0.00206265	0.00534101	4.15752
1929.56	7.86	0.328	-0.665	2	0.1	0.213	0.155	4.00306	2.00306	0.00121572	0.00206265	0.00534101	4.15752
1930.55	7.84	0.328	-0.665	2	0.1	0.213	0.15	3.99287	1.99287	0.00121572	0.00206265	0.00534101	4.0234
1931.53	7.84	0.328	-0.665	2	0.1	0.213	0.15	3.99287	1.99287	0.00121572	0.00206265	0.00534101	4.0234
1932.62	7.84	0.328	-0.665	1.995	0.1	0.213	0.15	3.99287	1.99787	0.00121572	0.00206265	0.00534101	4.0234
1933.61	7.84	0.328	-0.665	2	0.1	0.213	0.15	3.99287	1.99287	0.00121572	0.00206265	0.00534101	4.0234
1934.59	7.84	0.328	-0.665	2	0.1	0.213	0.15	3.99287	1.99287	0.00121572	0.00206265	0.00534101	4.0234
1935.58	7.84	0.329	-0.665	2	0.1	0.213	0.15	3.99287	1.99287	0.00122544	0.00206265	0.00535074	4.0234
1936.56	7.84	0.328	-0.665	2	0.1	0.213	0.15	3.99287	1.99287	0.00121572	0.00206265	0.00534101	4.0234
1937.55	7.84	0.328	-0.665	2	0.1	0.213	0.15	3.99287	1.99287	0.00121572	0.00206265	0.00534101	4.0234
1938.53	7.84	0.328	-0.665	2	0.1	0.213	0.15	3.99287	1.99287	0.00121572	0.00206265	0.00534101	4.0234
1939.62	7.84	0.328	-0.665	2	0.1	0.213	0.15	3.99287	1.99287	0.00121572	0.00206265	0.00534101	4.0234
1940.61	7.84	0.328	-0.665	2	0.1	0.213	0.15	3.99287	1.99287	0.00121572	0.00206265	0.00534101	4.0234
1941.59	7.84	0.328	-0.665	2	0.1	0.213	0.15	3.99287	1.99287	0.00121572	0.00206265	0.00534101	4.0234
1942.58	7.84	0.328	-0.665	2	0.1	0.213	0.15	3.99287	1.99287	0.00121572	0.00206265	0.00534101	4.0234
1943.56	7.84	0.328	-0.665	2	0.1	0.213	0.15	3.99287	1.99287	0.00121572	0.00206265	0.00534101	4.0234
1944.55	7.86	0.328	-0.665	2	0.1	0.213	0.15	4.00306	2.00306	0.00121572	0.00206265	0.00534101	4.0234
1945.53	7.86	0.328	-0.664	2	0.1	0.213	0.15	4.00306	2.00306	0.00121572	0.00206901	0.00535375	4.0234
1946.62	7.86	0.328	-0.664	2	0.1	0.213	0.15	4.00306	2.00306	0.00121572	0.00206901	0.00535375	4.0234
1947.61	7.86	0.329	-0.664	2	0.1	0.213	0.15	4.00306	2.00306	0.00122544	0.00206901	0.00536347	4.0234
1948.59	7.86	0.329	-0.664	2	0.1	0.213	0.15	4.00306	2.00306	0.00122544	0.00206901	0.00536347	4.0234
1949.58	7.86	0.329	-0.664	2	0.1	0.213	0.15	4.00306	2.00306	0.00122544	0.00206901	0.00536347	4.0234
1950.56	7.86	0.328	-0.664	2	0.1	0.213	0.15	4.00306	2.00306	0.00121572	0.00206901	0.00535375	4.0234
1951.55	7.86	0.328	-0.664	2	0.1	0.213	0.15	4.00306	2.00306	0.00121572	0.00206901	0.00535375	4.0234
1952.53	7.84	0.328	-0.665	2	0.1	0.213	0.15	3.99287	1.99287	0.00121572	0.00206265	0.00534101	4.0234
1953.62	7.86	0.329	-0.664	2	0.1	0.213	0.15	4.00306	2.00306	0.00122544	0.00206901	0.00536347	4.0234
1954.61	7.86	0.329	-0.664	2	0.1	0.213	0.15	4.00306	2.00306	0.00122544	0.00206901	0.00536347	4.0234
1955.59	7.86	0.329	-0.664	2	0.1	0.213	0.15	4.00306	2.00306	0.00122544	0.00206901	0.00536347	4.0234
1956.58	7.84	0.328	-0.664	2	0.1	0.213	0.15	3.99287	1.99287	0.00121572	0.00206901	0.00535375	4.0234
1957.56	7.84	0.329	-0.664	2	0.1	0.213	0.15	3.99287	1.99287	0.00122544	0.00206901	0.00536347	4.0234
1958.55	7.84	0.328	-0.664	2	0.1	0.213	0.15	3.99287	1.99287	0.00121572	0.00206901	0.00535375	4.0234
1959.53	7.84	0.328	-0.664	2	0.1	0.213	0.15	3.99287	1.99287	0.00121572	0.00206901	0.00535375	4.0234
1960.62	7.84	0.329	-0.664	2	0.1	0.213	0.15	3.99287	1.99287	0.00122544	0.00206901	0.00536347	4.0234
1961.61	7.84	0.329	-0.664	2	0.1	0.213	0.15	3.99287	1.99287	0.00122544	0.00206901	0.00536347	4.0234
1962.59	7.84	0.328	-0.664	2	0.1	0.213	0.15	3.99287	1.99287	0.00121572	0.00206901	0.00535375	4.0234
1963.58	7.84	0.329	-0.664	2	0.1	0.213	0.15	3.99287	1.99287	0.00122544	0.00206901	0.00536347	4.0234
1964.56	7.84	0.329	-0.664	2	0.1	0.213	0.15	3.99287	1.99287	0.00122544	0.00206901	0.00536347	4.0234
1965.55	7.84	0.328	-0.664	2	0.1	0.213	0.15	3.99287	1.99287	0.00121572	0.00206901	0.00535375	4.0234
1966.53	7.84	0.329	-0.664	2	0.1	0.213	0.15	3.99287	1.99287	0.00122544	0.00206901	0.00536347	4.0234
1967.62	7.84	0.329	-0.664	2	0.1	0.213	0.15	3.99287	1.99287	0.00122544	0.00206901	0.00536347	4.0234
1968.61	7.84	0.329	-0.664	2	0.1	0.213	0.15	3.99287	1.99287	0.00122544	0.00206901	0.00536347	4.0234
1969.59	7.84	0.329	-0.664	2	0.1	0.213	0.15	3.99287	1.99287	0.00122544	0.00206901	0.00536347	4.0234
1970.58	7.84	0.329	-0.664	2	0.1	0.213	0.15	3.99287	1.99287	0.00122544	0.00206901	0.00536347	4.0234
1971.56	7.84	0.329	-0.664	2	0.1	0.213	0.15	3.99287	1.99287	0.00122544	0.00206901	0.00536347	4.0234
1972.55	7.84	0.329	-0.664	2	0.1	0.213	0.15	3.99287	1.99287	0.00122544	0.00206901	0.00536347	4.0234
1973.53	7.84	0.328	-0.664	2	0.1	0.213	0.15	3.99287	1.99287	0.00121572	0.00206901	0.00535375	4.0234
1974.62	7.86	0.328	-0.664	2	0.1	0.213	0.15	4.00306	2.00306	0.00121572	0.00206901	0.00535375	4.0234
1975.61	7.9	0.329	-0.664	2	0.1	0.213	0.15	4.02343	2.02343	0.00122544	0.00206901	0.00536347	4.0234
1976.59	7.94	0.331	-0.664	2	0.1	0.213	0.15	4.0438	2.0438	0.00124489	0.00206901	0.00538292	4.0234
1977.58	8	0.331	-0.664	2	0.1	0.213	0.15	4.07436	2.07436	0.00124489	0.00206901	0.00538292	4.0234
1978.56	8.04	0.332	-0.665	2	0.1	0.213	0.15	4.09473	2.09473	0.00125462	0.00206265	0.00537992	4.0234
1979.55	8.1	0.332	-0.665	2	0.1	0.213	0.15	4.12529	2.12529	0.00125462	0.00206265	0.00537992	4.0234
1980.53	8.14	0.332	-0.665	2	0.1	0.213	0.15	4.14566	2.14566	0.00125462	0.00206265	0.00537992	4.0234
1981.62	8.2	0.334	-0.665	2	0.1	0.213	0.15	4.17622	2.17622	0.00127407	0.00206265	0.00539937	4.0234
1982.61	8.26	0.335	-0.665	2	0.1	0.213	0.15	4.20677	2.20677	0.0012838	0.00206265	0.00540909	4.0234
1983.59	8.32	0.335	-0.665	2	0.1	0.213	0.15	4.23733	2.23733	0.0012838	0.00206265	0.00540909	4.0234
1984.58	8.38	0.337	-0.665	2	0.1	0.213	0.15	4.26789	2.26789	0.00130325	0.00206265	0.00542854	4.0234
1985.56	8.42	0.338	-0.665	2	0.1	0.213	0.15	4.28826	2.28826	0.00131297	0.00206265	0.00543827	4.0234
1986.55	8.46	0.338	-0.666	2	0.1	0.213	0.15	4.30863	2.30863	0.00131297	0.00205628	0.00542554	4.0234
1987.53	8.52	0.339	-0.666	2	0.1	0.213	0.15	4.33919	2.33919	0.0013227	0.00205628	0.00543526	4.0234
1988.62	8.58	0.341	-0.666	2	0.1	0.213	0.15	4.36975	2.36975	0.00134215	0.00205628	0.00545472	4.0234
1989.61	8.62	0.341	-0.666	2	0.1	0.213	0.15	4.39012	2.39012	0.00134215	0.00205628	0.00545472	4.0234
1990.59	8.66	0.342	-0.666	2	0.1	0.213	0.15	4.41049	2.41049	0.00135188	0.00205628	0.00546444	4.0234
1991.58	8.72	0.344	-0.667	2	0.1	0.213	0.15	4.44105	2.44105	0.00137133	0.00204992	0.00547116	4.0234
1992.56	8.78	0.344	-0.667	2	0.1	0.213	0.15	4.47161	2.47161	0.00137133	0.00204992	0.00547116	4.0234
1993.55	8.82	0.345	-0.667	2	0.1	0.213	0.145	4.49198	2.49198	0.00138105	0.00204992	0.00548089	3.88929
1994.53	8.86	0.347	-0.667	2	0.1	0.213	0.145	4.51235	2.51235	0.00140051	0.00204992	0.00550034	3.88929
1995.62	8.92	0.347	-0.668	2	0.1	0.213	0.145	4.54291	2.54291	0.00140051	0.00204355	0.0054876	3.88929
1996.61	8.98	0.348	-0.668	2	0.1	0.213	0.145	4.57347	2.57347	0.00141023	0.00204355	0.00549733	3.88929
1997.6	9.02	0.35	-0.668	2	0.1	0.213	0.145	4.59384	2.59384	0.00142968	0.00204355	0.00551678	3.88929
1998.58	9.06	0.351	-0.669	2	0.1	0.213	0.145	4.61421	2.61421	0.00143941	0.00203718	0.00551378	3.88929
1999.56	9.12	0.351	-0.669	2	0.1	0.213	0.145	4.64477	2.64477	0.00143941	0.00203718	0.00551378	3.88929
2000.55	9.16	0.353	-0.669	2	0.1	0.213	0.145	4.66514	2.66514	0.00145886	0.00203718	0.00553323	3.88929
2001.53	9.22	0.354	-0.67	2	0.1	0.213	0.145	4.6957	2.6957	0.00146859	0.00203082	0.00553022	3.88929
2002.62	9.26	0.356	-0.67	2	0.1	0.213	0.145	4.71607	2.71607	0.00148804	0.00203082	0.00554967	3.88929
2003.61	9.32	0.356	-0.67	2	0.1	0.213	0.145	4.74663	2.74663	0.00148804	0.00203082	0.00554967	3.88929
2004.59	9.38	0.357	-0.671	2	0.1	0.213	0.145	4.77718	2.77718	0.00149776	0.00202445	0.00554666	3.88929
2005.58	9.42	0.359	-0.671	2	0.1	0.213	0.145	4.79756	2.79756	0.00151721	0.00202445	0.00556612	3.88929
2006.56	9.46	0.359	-0.671	2	0.1	0.213	0.145	4.81793	2.81793	0.00151721	0.00202445	0.00556612	3.88929
2007.54	9.52	0.36	-0.672	2	0.1	0.213	0.145	4.84848	2.84848	0.00152694	0.00201808	0.00556311	3.88929
2008.53	9.56	0.36	-0.672	2	0.1	0.213	0.145	4.86886	2.86886	0.00152694	0.00201808	0.00556311	3.88929
2009.62	9.62	0.363	-0.672	2	0.1	0.213	0.145	4.89941	2.89941	0.00155612	0.00201808	0.00559229	3.88929
2010.61	9.66	0.363	-0.673	2	0.1	0.213	0.145	4.91979	2.91979	0.00155612	0.00201172	0.00557955	3.88929
2011.59	9.72	0.364	-0.673	2	0.1	0.213	0.145	4.95034	2.95034	0.00156584	0.00201172	0.00558928	3.88929
2012.58	9.76	0.366	-0.673	2	0.1	0.213	0.14	4.97072	2.97072	0.00158529	0.00201172	0.00560873	3.75518
2013.56	9.8	0.366	-0.674	2	0.1	0.213	0.14	4.99109	2.99109	0.00158529	0.00200535	0.005596	3.75518
2014.55	9.86	0.367	-0.674	2	0.1	0.213	0.14	5.02165	3.02165	0.00159502	0.00200535	0.00560572	3.75518
2015.53	9.92	0.369	-0.674	2	0.1	0.213	0.14	5.0522	3.0522	0.00161447	0.00200535	0.00562518	3.75518
2016.62	9.96	0.37	-0.675	2	0.1	0.213	0.14	5.07257	3.07257	0.0016242	0.00199899	0.00562217	3.75518
2017.61	10.02	0.37	-0.675	2	0.1	0.213	0.14	5.10313	3.10313	0.0016242	0.00199899	0.00562217	3.75518
2018.59	10.06	0.373	-0.676	2	0.1	0.213	0.14	5.1235	3.1235	0.00165337	0.00199262	0.00563861	3.75518
2019.58	10.12	0.375	-0.676	2	0.1	0.213	0.14	5.15406	3.15406	0.00167283	0.00199262	0.00565807	3.75518
2020.56	10.16	0.375	-0.677	2	0.1	0.213	0.14	5.17443	3.17443	0.00167283	0.00198625	0.00564533	3.75518
2021.54	10.22	0.376	-0.677	2	0.1	0.213	0.14	5.20499	3.20499	0.00168255	0.00198625	0.00565506	3.75518
2022.53	10.26	0.376	-0.677	2	0.1	0.213	0.14	5.22536	3.22536	0.00168255	0.00198625	0.00565506	3.75518
2023.62	10.32	0.379	-0.678	2	0.1	0.213	0.14	5.25592	3.25592	0.00171173	0.00197989	0.0056715	3.75518
2024.61	10.36	0.379	-0.678	2	0.1	0.213	0.14	5.27629	3.27629	0.00171173	0.00197989	0.0056715	3.75518
2025.59	10.42	0.381	-0.679	2	0.1	0.213	0.14	5.30685	3.30685	0.00173118	0.00197352	0.00567822	3.75518
2026.58	10.48	0.382	-0.679	2	0.1	0.213	0.14	5.33741	3.33741	0.00174091	0.00197352	0.00568795	3.75518
2027.56	10.52	0.382	-0.68	2	0.1	0.213	0.14	5.35778	3.35778	0.00174091	0.00196716	0.00567522	3.75518
2028.55	10.58	0.384	-0.68	2	0.1	0.213	0.14	5.38834	3.38834	0.00176036	0.00196716	0.00569467	3.75518
2029.53	10.62	0.385	-0.68	2	0.1	0.213	0.14	5.40871	3.40871	0.00177008	0.00196716	0.00570439	3.75518
2030.62	10.68	0.386	-0.681	2	0.1	0.213	0.14	5.43927	3.43927	0.00177981	0.00196079	0.00570139	3.75518
2031.61	10.72	0.388	-0.681	2	0.1	0.213	0.135	5.45964	3.45964	0.00179926	0.00196079	0.00572084	3.62106
2032.6	10.78	0.388	-0.682	2	0.1	0.213	0.135	5.4902	3.4902	0.00179926	0.00195442	0.00570811	3.62106
2033.58	10.82	0.389	-0.682	2	0.1	0.213	0.135	5.51057	3.51057	0.00180899	0.00195442	0.00571783	3.62106
2034.56	10.86	0.391	-0.683	2	0.1	0.213	0.135	5.53094	3.53094	0.00182844	0.00194806	0.00572455	3.62106
2035.55	10.92	0.392	-0.683	2	0.1	0.213	0.135	5.5615	3.5615	0.00183816	0.00194806	0.00573428	3.62106
2036.53	10.96	0.394	-0.684	2	0.1	0.213	0.135	5.58187	3.58187	0.00185762	0.00194169	0.005741	3.62106
2037.62	11.02	0.395	-0.684	2	0.1	0.213	0.135	5.61243	3.61243	0.00186734	0.00194169	0.00575072	3.62106
2038.61	11.08	0.395	-0.685	2	0.1	0.213	0.135	5.64298	3.64298	0.00186734	0.00193532	0.00573799	3.62106
2039.59	11.12	0.397	-0.685	2	0.1	0.213	0.135	5.66336	3.66336	0.00188679	0.00193532	0.00575744	3.62106
2040.58	11.18	0.398	-0.685	2	0.1	0.213	0.135	5.69391	3.69391	0.00189652	0.00193532	0.00576717	3.62106
2041.56	11.22	0.4	-0.686	2	0.1	0.213	0.135	5.71429	3.71429	0.00191597	0.00192896	0.00577389	3.62106
2042.55	11.26	0.4	-0.686	2	0.1	0.213	0.135	5.73466	3.73466	0.00191597	0.00192896	0.00577389	3.62106
2043.53	11.3	0.401	-0.687	2	0.1	0.213	0.135	5.75503	3.75503	0.0019257	0.00192259	0.00577088	3.62106
2044.62	11.36	0.403	-0.687	2	0.1	0.213	0.135	5.78559	3.78559	0.00194515	0.00192259	0.00579033	3.62106
2045.61	11.42	0.404	-0.688	2	0.1	0.213	0.135	5.81614	3.81614	0.00195487	0.00191623	0.00578732	3.62106
2046.59	11.46	0.404	-0.688	2	0.1	0.213	0.135	5.83652	3.83652	0.00195487	0.00191623	0.00578732	3.62106
2047.58	11.52	0.407	-0.689	2	0.1	0.213	0.135	5.86707	3.86707	0.00198405	0.00190986	0.00580377	3.62106
2048.56	11.56	0.407	-0.689	2	0.1	0.213	0.13	5.88745	3.88745	0.00198405	0.00190986	0.00580377	3.48695
2049.55	11.6	0.408	-0.69	2	0.1	0.213	0.13	5.90782	3.90782	0.00199378	0.00190349	0.00580076	3.48695
2050.53	11.62	0.408	-0.69	2	0.1	0.213	0.13	5.918	3.918	0.00199378	0.00190349	0.00580076	3.48695
2051.62	11.62	0.41	-0.691	2	0.1	0.213	0.13	5.918	3.918	0.00201323	0.00189713	0.00580748	3.48695
2052.61	11.62	0.41	-0.691	2	0.1	0.213	0.13	5.918	3.918	0.00201323	0.00189713	0.00580748	3.48695
2053.59	11.64	0.41	-0.691	2	0.1	0.213	0.13	5.92819	3.92819	0.00201323	0.00189713	0.00580748	3.48695
2054.58	11.66	0.411	-0.692	2	0.1	0.213	0.13	5.93838	3.93838	0.00202295	0.00189076	0.00580447	3.48695
2055.56	11.66	0.411	-0.692	2	0.1	0.213	0.13	5.93838	3.93838	0.00202295	0.00189076	0.00580447	3.48695
2056.55	11.66	0.411	-0.692	2	0.1	0.213	0.13	5.93838	3.93838	0.00202295	0.00189076	0.00580447	3.48695
2057.53	11.66	0.411	-0.692	2	0.1	0.213	0.13	5.93838	3.93838	0.00202295	0.00189076	0.00580447	3.48695
2058.62	11.68	0.413	-0.692	2	0.1	0.213	0.13	5.94856	3.94856	0.0020424	0.00189076	0.00582393	3.48695
2059.61	11.68	0.413	-0.693	2	0.1	0.213	0.13	5.94856	3.94856	0.0020424	0.00188439	0.00581119	3.48695
2060.59	11.68	0.413	-0.693	2	0.1	0.213	0.13	5.94856	3.94856	0.0020424	0.00188439	0.00581119	3.48695
2061.58	11.68	0.413	-0.693	2	0.1	0.213	0.13	5.94856	3.94856	0.0020424	0.00188439	0.00581119	3.48695
2062.56	11.68	0.413	-0.693	2	0.1	0.213	0.13	5.94856	3.94856	0.0020424	0.00188439	0.00581119	3.48695
2063.55	11.68	0.413	-0.693	2	0.1	0.213	0.13	5.94856	3.94856	0.0020424	0.00188439	0.00581119	3.48695
2064.53	11.68	0.413	-0.693	2	0.1	0.213	0.13	5.94856	3.94856	0.0020424	0.00188439	0.00581119	3.48695
2065.62	11.7	0.413	-0.693	2	0.1	0.213	0.13	5.95875	3.95875	0.0020424	0.00188439	0.00581119	3.48695
2066.61	11.7	0.414	-0.693	2	0.1	0.213	0.13	5.95875	3.95875	0.00205213	0.00188439	0.00582092	3.48695
2067.59	11.7	0.414	-0.693	2	0.1	0.213	0.13	5.95875	3.95875	0.00205213	0.00188439	0.00582092	3.48695
2068.57	11.7	0.413	-0.693	2	0.1	0.213	0.13	5.95875	3.95875	0.0020424	0.00188439	0.00581119	3.48695
2069.56	11.72	0.414	-0.693	2	0.1	0.213	0.13	5.96893	3.96893	0.00205213	0.00188439	0.00582092	3.48695
2070.55	11.72	0.414	-0.694	2	0.1	0.213	0.13	5.96893	3.96893	0.00205213	0.00187803	0.00580819	3.48695
2071.53	11.72	0.414	-0.694	2	0.1	0.213	0.13	5.96893	3.96893	0.00205213	0.00187803	0.00580819	3.48695
2072.62	11.72	0.414	-0.694	2	0.1	0.213	0.13	5.96893	3.96893	0.00205213	0.00187803	0.00580819	3.48695
2073.61	11.72	0.416	-0.694	2	0.1	0.213	0.13	5.96893	3.96893	0.00207158	0.00187803	0.00582764	3.48695
2074.59	11.72	0.414	-0.694	2	0.1	0.213	0.13	5.96893	3.96893	0.00205213	0.00187803	0.00580819	3.48695
2075.58	11.74	0.414	-0.694	2	0.1	0.213	0.13	5.97912	3.97912	0.00205213	0.00187803	0.00580819	3.48695
2076.56	11.74	0.414	-0.694	2	0.1	0.213	0.13	5.97912	3.97912	0.00205213	0.00187803	0.00580819	3.48695
2077.55	11.74	0.414	-0.694	2	0.1	0.213	0.13	5.97912	3.97912	0.00205213	0.00187803	0.00580819	3.48695
2078.53	11.74	0.414	-0.694	2	0.1	0.213	0.13	5.97912	3.97912	0.00205213	0.00187803	0.00580819	3.48695
2079.62	11.74	0.416	-0.694	2	0.1	0.213	0.13	5.97912	3.97912	0.00207158	0.00187803	0.00582764	3.48695
2080.61	11.74	0.416	-0.694	2	0.1	0.213	0.13	5.97912	3.97912	0.00207158	0.00187803	0.00582764	3.48695
2081.59	11.74	0.416	-0.694	2	0.1	0.213	0.13	5.97912	3.97912	0.00207158	0.00187803	0.00582764	3.48695
2082.57	11.76	0.416	-0.694	2	0.1	0.213	0.13	5.9893	3.9893	0.00207158	0.00187803	0.00582764	3.48695
2083.56	11.74	0.416	-0.694	2	0.1	0.213	0.13	5.97912	3.97912	0.00207158	0.00187803	0.00582764	3.48695
2084.55	11.76	0.416	-0.694	2	0.1	0.213	0.13	5.9893	3.9893	0.00207158	0.00187803	0.00582764	3.48695
2085.53	11.76	0.416	-0.694	2	0.1	0.213	0.13	5.9893	3.9893	0.00207158	0.00187803	0.00582764	3.48695
2086.62	11.76	0.416	-0.694	2	0.1	0.213	0.13	5.9893	3.9893	0.00207158	0.00187803	0.00582764	3.48695
2087.61	11.76	0.416	-0.694	2	0.1	0.213	0.13	5.9893	3.9893	0.00207158	0.00187803	0.00582764	3.48695
2088.59	11.76	0.416	-0.694	2	0.1	0.213	0.13	5.9893	3.9893	0.00207158	0.00187803	0.00582764	3.48695
2089.58	11.76	0.416	-0.694	2	0.1	0.213	0.13	5.9893	3.9893	0.00207158	0.00187803	0.00582764	3.48695
2090.56	11.76	0.416	-0.694	2	0.1	0.213	0.13	5.9893	3.9893	0.00207158	0.00187803	0.00582764	3.48695
2091.55	11.78	0.416	-0.694	2	0.1	0.213	0.13	5.99949	3.99949	0.00207158	0.00187803	0.00582764	3.48695
2092.53	11.78	0.416	-0.694	2	0.1	0.213	0.13	5.99949	3.99949	0.00207158	0.00187803	0.00582764	3.48695
2093.62	11.78	0.416	-0.694	2	0.1	0.213	0.13	5.99949	3.99949	0.00207158	0.00187803	0.00582764	3.48695
2094.61	11.76	0.416	-0.694	2	0.1	0.213	0.13	5.9893	3.9893	0.00207158	0.00187803	0.00582764	3.48695
2095.59	11.78	0.416	-0.694	2	0.1	0.213	0.13	5.99949	3.99949	0.00207158	0.00187803	0.00582764	3.48695
2096.58	11.78	0.417	-0.694	2	0.1	0.213	0.13	5.99949	3.99949	0.00208131	0.00187803	0.00583736	3.48695
2097.56	11.78	0.417	-0.694	2	0.1	0.213	0.13	5.99949	3.99949	0.00208131	0.00187803	0.00583736	3.48695
2098.55	11.78	0.417	-0.694	2	0.1	0.213	0.13	5.99949	3.99949	0.00208131	0.00187803	0.00583736	3.48695
2099.53	11.78	0.417	-0.694	2	0.1	0.213	0.13	5.99949	3.99949	0.00208131	0.00187803	0.00583736	3.48695
2100.62	11.78	0.417	-0.694	2	0.1	0.213	0.13	5.99949	3.99949	0.00208131	0.00187803	0.00583736	3.48695
2101.61	11.78	0.417	-0.694	2	0.1	0.213	0.13	5.99949	3.99949	0.00208131	0.00187803	0.00583736	3.48695
2102.59	11.78	0.417	-0.694	2	0.1	0.213	0.13	5.99949	3.99949	0.00208131	0.00187803	0.00583736	3.48695
2103.58	11.78	0.417	-0.694	2	0.1	0.213	0.13	5.99949	3.99949	0.00208131	0.00187803	0.00583736	3.48695
2104.56	11.78	0.417	-0.694	2	0.1	0.213	0.13	5.99949	3.99949	0.00208131	0.00187803	0.00583736	3.48695
2105.55	11.78	0.417	-0.694	2	0.1	0.213	0.13	5.99949	3.99949	0.00208131	0.00187803	0.00583736	3.48695
2106.53	11.78	0.417	-0.694	2	0.1	0.213	0.13	5.99949	3.99949	0.00208131	0.00187803	0.00583736	3.48695
2107.62	11.78	0.417	-0.694	2	0.1	0.213	0.13	5.99949	3.99949	0.00208131	0.00187803	0.00583736	3.48695
2108.61	11.78	0.417	-0.694	2	0.1	0.213	0.13	5.99949	3.99949	0.00208131	0.00187803	0.00583736	3.48695
2109.59	11.78	0.417	-0.694	2	0.1	0.213	0.13	5.99949	3.99949	0.00208131	0.00187803	0.00583736	3.48695
2110.58	11.78	0.417	-0.694	2	0.1	0.213	0.13	5.99949	3.99949	0.00208131	0.00187803	0.00583736	3.48695
2111.56	11.78	0.417	-0.694	2	0.1	0.213	0.13	5.99949	3.99949	0.00208131	0.00187803	0.00583736	3.48695
2112.54	11.78	0.417	-0.694	2	0.1	0.213	0.13	5.99949	3.99949	0.00208131	0.00187803	0.00583736	3.48695
2113.53	11.78	0.417	-0.694	2	0.1	0.213	0.13	5.99949	3.99949	0.00208131	0.00187803	0.00583736	3.48695
2114.62	11.78	0.417	-0.694	2	0.1	0.213	0.13	5.99949	3.99949	0.00208131	0.00187803	0.00583736	3.48695
2115.61	11.78	0.417	-0.694	2	0.1	0.213	0.13	5.99949	3.99949	0.00208131	0.00187803	0.00583736	3.48695
2116.59	11.78	0.417	-0.694	2	0.1	0.213	0.13	5.99949	3.99949	0.00208131	0.00187803	0.00583736	3.48695
2117.58	11.78	0.417	-0.694	2	0.1	0.213	0.13	5.99949	3.99949	0.00208131	0.00187803	0.00583736	3.48695
2118.56	11.78	0.417	-0.694	2	0.1	0.213	0.13	5.99949	3.99949	0.00208131	0.00187803	0.00583736	3.48695
2119.55	11.78	0.417	-0.694	2	0.1	0.213	0.13	5.99949	3.99949	0.00208131	0.00187803	0.00583736	3.48695
2120.53	11.78	0.417	-0.694	2	0.1	0.213	0.13	5.99949	3.99949	0.00208131	0.00187803	0.00583736	3.48695
2121.62	11.78	0.419	-0.694	2	0.1	0.213	0.13	5.99949	3.99949	0.00210076	0.00187803	0.00585682	3.48695
2122.61	11.78	0.417	-0.694	2	0.1	0.213	0.13	5.99949	3.99949	0.00208131	0.00187803	0.00583736	3.48695
2123.59	11.78	0.417	-0.694	2	0.1	0.213	0.13	5.99949	3.99949	0.00208131	0.00187803	0.00583736	3.48695
2124.58	11.78	0.417	-0.694	2	0.1	0.213	0.13	5.99949	3.99949	0.00208131	0.00187803	0.00583736	3.48695
2125.56	11.78	0.419	-0.694	2	0.1	0.213	0.13	5.99949	3.99949	0.00210076	0.00187803	0.00585682	3.48695
2126.55	11.78	0.419	-0.694	2	0.1	0.213	0.13	5.99949	3.99949	0.00210076	0.00187803	0.00585682	3.48695
2127.53	11.78	0.417	-0.694	2	0.1	0.213	0.13	5.99949	3.99949	0.00208131	0.00187803	0.00583736	3.48695
2128.62	11.78	0.419	-0.694	2	0.1	0.213	0.13	5.99949	3.99949	0.00210076	0.00187803	0.00585682	3.48695
2129.61	11.78	0.419	-0.694	2	0.1	0.213	0.13	5.99949	3.99949	0.00210076	0.00187803	0.00585682	3.48695
2130.59	11.78	0.419	-0.694	2	0.1	0.213	0.13	5.99949	3.99949	0.00210076	0.00187803	0.00585682	3.48695
2131.58	11.78	0.417	-0.694	2	0.1	0.213	0.13	5.99949	3.99949	0.00208131	0.00187803	0.00583736	3.48695
2132.56	11.78	0.419	-0.694	2	0.1	0.213	0.13	5.99949	3.99949	0.00210076	0.00187803	0.00585682	3.48695
2133.55	11.78	0.419	-0.694	2	0.1	0.213	0.13	5.99949	3.99949	0.00210076	0.00187803	0.00585682	3.48695
2134.53	11.78	0.419	-0.694	2	0.1	0.213	0.13	5.99949	3.99949	0.00210076	0.00187803	0.00585682	3.48695
2135.62	11.78	0.419	-0.694	2	0.1	0.213	0.13	5.99949	3.99949	0.00210076	0.00187803	0.00585682	3.48695
2136.61	11.78	0.419	-0.694	2	0.1	0.213	0.13	5.99949	3.99949	0.00210076	0.00187803	0.00585682	3.48695
2137.59	11.78	0.419	-0.694	2	0.1	0.213	0.13	5.99949	3.99949	0.00210076	0.00187803	0.00585682	3.48695
2138.58	11.78	0.419	-0.694	2	0.1	0.213	0.13	5.99949	3.99949	0.00210076	0.00187803	0.00585682	3.48695
2139.56	11.78	0.419	-0.694	2	0.1	0.213	0.13	5.99949	3.99949	0.00210076	0.00187803	0.00585682	3.48695
2140.55	11.78	0.419	-0.694	2	0.1	0.213	0.13	5.99949	3.99949	0.00210076	0.00187803	0.00585682	3.48695
2141.53	11.78	0.419	-0.694	2	0.1	0.213	0.13	5.99949	3.99949	0.00210076	0.00187803	0.00585682	3.48695
2142.62	11.78	0.419	-0.694	2	0.1	0.213	0.13	5.99949	3.99949	0.00210076	0.00187803	0.00585682	3.48695
2143.61	11.78	0.419	-0.694	2	0.1	0.213	0.13	5.99949	3.99949	0.00210076	0.00187803	0.00585682	3.48695
2144.59	11.78	0.419	-0.694	2	0.1	0.213	0.13	5.99949	3.99949	0.00210076	0.00187803	0.00585682	3.48695
2145.58	11.78	0.419	-0.694	2	0.1	0.213	0.13	5.99949	3.99949	0.00210076	0.00187803	0.00585682	3.48695
2146.56	11.78	0.419	-0.694	2	0.1	0.213	0.13	5.99949	3.99949	0.00210076	0.00187803	0.00585682	3.48695
2147.55	11.78	0.419	-0.694	2	0.1	0.213	0.13	5.99949	3.99949	0.00210076	0.00187803	0.00585682	3.48695
2148.53	11.78	0.419	-0.694	2	0.1	0.213	0.13	5.99949	3.99949	0.00210076	0.00187803	0.00585682	3.48695
2149.62	11.78	0.419	-0.694	2	0.1	0.213	0.13	5.99949	3.99949	0.00210076	0.00187803	0.00585682	3.48695
2150.61	11.78	0.419	-0.694	2	0.1	0.213	0.13	5.99949	3.99949	0.00210076	0.00187803	0.00585682	3.48695
2151.59	11.78	0.419	-0.694	2	0.1	0.213	0.13	5.99949	3.99949	0.00210076	0.00187803	0.00585682	3.48695
2152.57	11.78	0.419	-0.694	2	0.1	0.213	0.13	5.99949	3.99949	0.00210076	0.00187803	0.00585682	3.48695
2153.56	11.78	0.419	-0.694	2	0.1	0.213	0.125	5.99949	3.99949	0.00210076	0.00187803	0.00585682	3.35284
2154.55	11.78	0.419	-0.694	2	0.1	0.213	0.125	5.99949	3.99949	0.00210076	0.00187803	0.00585682	3.35284
2155.53	11.78	0.419	-0.694	2	0.1	0.213	0.125	5.99949	3.99949	0.00210076	0.00187803	0.00585682	3.35284
2156.62	11.78	0.419	-0.694	2	0.1	0.213	0.125	5.99949	3.99949	0.00210076	0.00187803	0.00585682	3.35284
2157.61	11.78	0.419	-0.694	2	0.1	0.213	0.125	5.99949	3.99949	0.00210076	0.00187803	0.00585682	3.35284
2158.59	11.78	0.419	-0.694	2	0.1	0.213	0.125	5.99949	3.99949	0.00210076	0.00187803	0.00585682	3.35284
2159.58	11.78	0.419	-0.694	2	0.1	0.213	0.125	5.99949	3.99949	0.00210076	0.00187803	0.00585682	3.35284
2160.56	11.78	0.419	-0.694	2	0.1	0.213	0.125	5.99949	3.99949	0.00210076	0.00187803	0.00585682	3.35284
2161.55	11.76	0.419	-0.694	2	0.1	0.213	0.125	5.9893	3.9893	0.00210076	0.00187803	0.00585682	3.35284
2162.53	11.76	0.419	-0.694	2	0.1	0.213	0.125	5.9893	3.9893	0.00210076	0.00187803	0.00585682	3.35284
2163.62	11.78	0.419	-0.694	2	0.1	0.213	0.125	5.99949	3.99949	0.00210076	0.00187803	0.00585682	3.35284
2164.61	11.76	0.419	-0.694	2	0.1	0.213	0.125	5.9893	3.9893	0.00210076	0.00187803	0.00585682	3.35284
2165.59	11.76	0.419	-0.694	2	0.1	0.213	0.125	5.9893	3.9893	0.00210076	0.00187803	0.00585682	3.35284
2166.58	11.76	0.419	-0.694	2	0.1	0.213	0.125	5.9893	3.9893	0.00210076	0.00187803	0.00585682	3.35284
2167.56	11.76	0.419	-0.694	2	0.1	0.213	0.125	5.9893	3.9893	0.00210076	0.00187803	0.00585682	3.35284
2168.55	11.76	0.419	-0.694	2	0.1	0.213	0.125	5.9893	3.9893	0.00210076	0.00187803	0.00585682	3.35284
2169.53	11.76	0.419	-0.694	2	0.1	0.213	0.125	5.9893	3.9893	0.00210076	0.00187803	0.00585682	3.35284
2170.62	11.78	0.419	-0.694	2	0.1	0.213	0.125	5.99949	3.99949	0.00210076	0.00187803	0.00585682	3.35284
2171.61	11.78	0.419	-0.694	2	0.1	0.213	0.125	5.99949	3.99949	0.00210076	0.00187803	0.00585682	3.35284
2172.59	11.78	0.419	-0.694	2	0.1	0.213	0.125	5.99949	3.99949	0.00210076	0.00187803	0.00585682	3.35284
2173.58	11.78	0.419	-0.694	2	0.1	0.213	0.125	5.99949	3.99949	0.00210076	0.00187803	0.00585682	3.35284
2174.56	11.78	0.419	-0.694	2	0.1	0.213	0.125	5.99949	3.99949	0.00210076	0.00187803	0.00585682	3.35284
2175.55	11.78	0.419	-0.694	2	0.1	0.213	0.125	5.99949	3.99949	0.00210076	0.00187803	0.00585682	3.35284
2176.53	11.78	0.419	-0.694	2	0.1	0.213	0.125	5.99949	3.99949	0.00210076	0.00187803	0.00585682	3.35284
2177.62	11.78	0.42	-0.694	2	0.1	0.213	0.125	5.99949	3.99949	0.00211048	0.00187803	0.00586654	3.35284
2178.61	11.78	0.42	-0.694	2	0.1	0.213	0.125	5.99949	3.99949	0.00211048	0.00187803	0.00586654	3.35284
2179.59	11.78	0.419	-0.694	2	0.1	0.213	0.125	5.99949	3.99949	0.00210076	0.00187803	0.00585682	3.35284
2180.58	11.78	0.42	-0.694	2	0.1	0.213	0.125	5.99949	3.99949	0.00211048	0.00187803	0.00586654	3.35284
2181.56	11.78	0.42	-0.694	2	0.1	0.213	0.125	5.99949	3.99949	0.00211048	0.00187803	0.00586654	3.35284
2182.55	11.78	0.42	-0.694	2	0.1	0.213	0.125	5.99949	3.99949	0.00211048	0.00187803	0.00586654	3.35284
2183.53	11.78	0.42	-0.694	2	0.1	0.213	0.125	5.99949	3.99949	0.00211048	0.00187803	0.00586654	3.35284
2184.62	11.78	0.42	-0.694	2	0.1	0.213	0.125	5.99949	3.99949	0.00211048	0.00187803	0.00586654	3.35284
2185.61	11.78	0.419	-0.694	2	0.1	0.213	0.125	5.99949	3.99949	0.00210076	0.00187803	0.00585682	3.35284
2186.59	11.78	0.42	-0.694	2	0.1	0.213	0.125	5.99949	3.99949	0.00211048	0.00187803	0.00586654	3.35284
2187.57	11.78	0.42	-0.694	2	0.1	0.213	0.125	5.99949	3.99949	0.00211048	0.00187803	0.00586654	3.35284
2188.56	11.78	0.42	-0.694	2	0.1	0.213	0.125	5.99949	3.99949	0.00211048	0.00187803	0.00586654	3.35284
2189.55	11.78	0.42	-0.694	2	0.1	0.213	0.125	5.99949	3.99949	0.00211048	0.00187803	0.00586654	3.35284
2190.53	11.78	0.42	-0.694	2	0.1	0.213	0.125	5.99949	3.99949	0.00211048	0.00187803	0.00586654	3.35284
2191.62	11.78	0.42	-0.694	2	0.1	0.213	0.125	5.99949	3.99949	0.00211048	0.00187803	0.00586654	3.35284
2192.61	11.78	0.419	-0.694	2	0.1	0.213	0.125	5.99949	3.99949	0.00210076	0.00187803	0.00585682	3.35284
2193.59	11.8	0.42	-0.694	2	0.1	0.213	0.125	6.00968	4.00968	0.00211048	0.00187803	0.00586654	3.35284
2194.58	11.8	0.42	-0.694	2	0.1	0.213	0.125	6.00968	4.00968	0.00211048	0.00187803	0.00586654	3.35284
2195.56	11.8	0.42	-0.694	2	0.1	0.213	0.125	6.00968	4.00968	0.00211048	0.00187803	0.00586654	3.35284
2196.55	11.8	0.42	-0.694	2	0.1	0.213	0.125	6.00968	4.00968	0.00211048	0.00187803	0.00586654	3.35284
2197.53	11.8	0.42	-0.694	2	0.1	0.213	0.125	6.00968	4.00968	0.00211048	0.00187803	0.00586654	3.35284
2198.62	11.8	0.42	-0.694	2.005	0.1	0.213	0.125	6.00968	4.00468	0.00211048	0.00187803	0.00586654	3.35284
2199.61	11.78	0.42	-0.694	2	0.1	0.213	0.125	5.99949	3.99949	0.00211048	0.00187803	0.00586654	3.35284
2200.59	11.78	0.42	-0.694	2	0.1	0.213	0.125	5.99949	3.99949	0.00211048	0.00187803	0.00586654	3.35284
2201.58	11.78	0.42	-0.694	2	0.1	0.213	0.125	5.99949	3.99949	0.00211048	0.00187803	0.00586654	3.35284
2202.56	11.78	0.42	-0.694	2.015	0.1	0.213	0.125	5.99949	3.98449	0.00211048	0.00187803	0.00586654	3.35284
2203.54	11.78	0.42	-0.694	2.055	0.1	0.213	0.125	5.99949	3.94449	0.00211048	0.00187803	0.00586654	3.35284
2204.53	11.78	0.42	-0.693	2.07	0.1	0.213	0.125	5.99949	3.92949	0.00211048	0.00188439	0.00587927	3.35284
2205.62	11.78	0.42	-0.693	2.105	0.1	0.213	0.125	5.99949	3.89449	0.00211048	0.00188439	0.00587927	3.35284
2206.61	11.78	0.42	-0.692	2.16	0.1	0.213	0.125	5.99949	3.83949	0.00211048	0.00189076	0.00589201	3.35284
2207.59	11.78	0.42	-0.691	2.225	0.1	0.213	0.125	5.99949	3.77449	0.00211048	0.00189713	0.00590474	3.35284
2208.58	11.78	0.42	-0.69	2.295	0.1	0.213	0.125	5.99949	3.70449	0.00211048	0.00190349	0.00591747	3.35284
2209.56	11.78	0.42	-0.689	2.35	0.1	0.213	0.125	5.99949	3.64949	0.00211048	0.00190986	0.0059302	3.35284
2210.55	11.78	0.42	-0.687	2.405	0.1	0.213	0.125	5.99949	3.59449	0.00211048	0.00192259	0.00595567	3.35284
2211.53	11.78	0.42	-0.686	2.46	0.1	0.213	0.125	5.99949	3.53949	0.00211048	0.00192896	0.0059684	3.35284
2212.62	11.78	0.42	-0.685	2.52	0.1	0.213	0.125	5.99949	3.47949	0.00211048	0.00193532	0.00598113	3.35284
2213.61	11.78	0.42	-0.684	2.575	0.1	0.213	0.125	5.99949	3.42449	0.00211048	0.00194169	0.00599386	3.35284
2214.59	11.78	0.42	-0.682	2.625	0.1	0.213	0.125	5.99949	3.37449	0.00211048	0.00195442	0.00601933	3.35284
2215.58	11.78	0.42	-0.682	2.665	0.1	0.213	0.125	5.99949	3.33449	0.00211048	0.00195442	0.00601933	3.35284
2216.56	11.78	0.42	-0.681	2.705	0.1	0.213	0.125	5.99949	3.29449	0.00211048	0.00196079	0.00603206	3.35284
2217.55	11.78	0.42	-0.68	2.755	0.1	0.213	0.125	5.99949	3.24449	0.00211048	0.00196716	0.00604479	3.35284
2218.53	11.78	0.42	-0.679	2.805	0.1	0.213	0.125	5.99949	3.19449	0.00211048	0.00197352	0.00605753	3.35284
2219.62	11.78	0.42	-0.678	2.855	0.1	0.213	0.125	5.99949	3.14449	0.00211048	0.00197989	0.00607026	3.35284
2220.61	11.78	0.42	-0.677	2.905	0.1	0.213	0.125	5.99949	3.09449	0.00211048	0.00198625	0.00608299	3.35284
2221.59	11.78	0.42	-0.676	2.955	0.1	0.213	0.125	5.99949	3.04449	0.00211048	0.00199262	0.00609572	3.35284
2222.57	11.78	0.42	-0.675	3.005	0.1	0.213	0.125	5.99949	2.99449	0.00211048	0.00199899	0.00610846	3.35284
2223.56	11.78	0.42	-0.674	3.045	0.1	0.213	0.125	5.99949	2.95449	0.00211048	0.00200535	0.00612119	3.35284
2224.55	11.78	0.42	-0.673	3.1	0.1	0.213	0.125	5.99949	2.89949	0.00211048	0.00201172	0.00613392	3.35284
2225.53	11.78	0.42	-0.672	3.15	0.1	0.213	0.12	5.99949	2.84949	0.00211048	0.00201808	0.00614665	3.21872
2226.62	11.78	0.42	-0.671	3.205	0.1	0.213	0.12	5.99949	2.79449	0.00211048	0.00202445	0.00615939	3.21872
2227.61	11.78	0.42	-0.67	3.255	0.1	0.213	0.12	5.99949	2.74449	0.00211048	0.00203082	0.00617212	3.21872
2228.59	11.78	0.419	-0.668	3.31	0.1	0.213	0.12	5.99949	2.68949	0.00210076	0.00204355	0.00618786	3.21872
2229.58	11.78	0.42	-0.667	3.36	0.1	0.213	0.12	5.99949	2.63949	0.00211048	0.00204992	0.00621032	3.21872
2230.56	11.78	0.419	-0.666	3.405	0.1	0.213	0.12	5.99949	2.59449	0.00210076	0.00205628	0.00621332	3.21872
2231.55	11.78	0.419	-0.664	3.455	0.1	0.213	0.12	5.99949	2.54449	0.00210076	0.00206901	0.00623879	3.21872
2232.53	11.78	0.419	-0.663	3.505	0.1	0.213	0.12	5.99949	2.49449	0.00210076	0.00207538	0.00625152	3.21872
2233.62	11.78	0.419	-0.662	3.555	0.1	0.213	0.12	5.99949	2.44449	0.00210076	0.00208175	0.00626425	3.21872
2234.61	11.78	0.419	-0.661	3.61	0.1	0.213	0.12	5.99949	2.38949	0.00210076	0.00208811	0.00627698	3.21872
2235.59	11.78	0.419	-0.659	3.655	0.1	0.213	0.12	5.99949	2.34449	0.00210076	0.00210085	0.00630245	3.21872
2236.58	11.78	0.419	-0.658	3.705	0.1	0.213	0.12	5.99949	2.29449	0.00210076	0.00210721	0.00631518	3.21872
2237.56	11.78	0.419	-0.657	3.755	0.1	0.213	0.12	5.99949	2.24449	0.00210076	0.00211358	0.00632791	3.21872
2238.55	11.78	0.419	-0.655	3.805	0.1	0.213	0.12	5.99949	2.19449	0.00210076	0.00212631	0.00635338	3.21872
2239.53	11.78	0.419	-0.654	3.855	0.1	0.213	0.12	5.99949	2.14449	0.00210076	0.00213268	0.00636611	3.21872
2240.62	11.78	0.419	-0.653	3.91	0.1	0.213	0.12	5.99949	2.08949	0.00210076	0.00213904	0.00637884	3.21872
2241.61	11.78	0.419	-0.651	3.96	0.1	0.213	0.12	5.99949	2.03949	0.00210076	0.00215177	0.00640431	3.21872
2242.59	11.78	0.419	-0.65	4.01	0.1	0.213	0.12	5.99949	1.98949	0.00210076	0.00215814	0.00641704	3.21872
2243.58	11.78	0.419	-0.649	4.06	0.1	0.213	0.12	5.99949	1.93949	0.00210076	0.00216451	0.00642977	3.21872
2244.56	11.78	0.419	-0.647	4.105	0.1	0.213	0.12	5.99949	1.89449	0.00210076	0.00217724	0.00645524	3.21872
2245.55	11.78	0.419	-0.646	4.15	0.1	0.213	0.12	5.99949	1.84949	0.00210076	0.00218361	0.00646797	3.21872
2246.53	11.78	0.417	-0.645	4.21	0.1	0.213	0.12	5.99949	1.78949	0.00208131	0.00218997	0.00646125	3.21872
2247.62	11.78	0.417	-0.643	4.26	0.1	0.213	0.12	5.99949	1.73949	0.00208131	0.0022027	0.00648672	3.21872
2248.61	11.78	0.417	-0.642	4.31	0.1	0.213	0.12	5.99949	1.68949	0.00208131	0.00220907	0.00649945	3.21872
2249.59	11.78	0.417	-0.641	4.355	0.1	0.213	0.115	5.99949	1.64449	0.00208131	0.00221544	0.00651218	3.08461
2250.58	11.78	0.417	-0.639	4.405	0.1	0.213	0.115	5.99949	1.59449	0.00208131	0.00222817	0.00653765	3.08461
2251.56	11.78	0.417	-0.638	4.45	0.1	0.213	0.115	5.99949	1.54949	0.00208131	0.00223454	0.00655038	3.08461
2252.55	11.78	0.417	-0.637	4.505	0.1	0.213	0.115	5.99949	1.49449	0.00208131	0.0022409	0.00656311	3.08461
2253.53	11.78	0.417	-0.636	4.555	0.1	0.213	0.115	5.99949	1.44449	0.00208131	0.00224727	0.00657584	3.08461
2254.62	11.78	0.417	-0.634	4.61	0.1	0.213	0.115	5.99949	1.38949	0.00208131	0.00226	0.00660131	3.08461
2255.61	11.78	0.417	-0.633	4.655	0.1	0.213	0.115	5.99949	1.34449	0.00208131	0.00226637	0.00661404	3.08461
2256.59	11.78	0.417	-0.631	4.71	0.1	0.213	0.115	5.99949	1.28949	0.00208131	0.0022791	0.0066395	3.08461
2257.57	11.78	0.416	-0.63	4.76	0.1	0.213	0.115	5.99949	1.23949	0.00207158	0.00228546	0.00664251	3.08461
2258.56	11.78	0.417	-0.629	4.805	0.1	0.213	0.115	5.99949	1.19449	0.00208131	0.00229183	0.00666497	3.08461
2259.55	11.78	0.416	-0.627	4.85	0.1	0.213	0.115	5.99949	1.14949	0.00207158	0.00230456	0.00668071	3.08461
2260.53	11.78	0.416	-0.626	4.905	0.1	0.213	0.115	5.99949	1.09449	0.00207158	0.00231093	0.00669344	3.08461
2261.62	11.78	0.416	-0.625	4.955	0.1	0.213	0.115	5.99949	1.04449	0.00207158	0.0023173	0.00670617	3.08461
2262.61	11.78	0.416	-0.623	5.005	0.1	0.213	0.115	5.99949	0.994491	0.00207158	0.00233003	0.00673164	3.08461
2263.59	11.78	0.416	-0.622	5.055	0.1	0.213	0.115	5.99949	0.944491	0.00207158	0.00233639	0.00674437	3.08461
2264.58	11.78	0.416	-0.621	5.11	0.1	0.213	0.115	5.99949	0.889491	0.00207158	0.00234276	0.0067571	3.08461
2265.56	11.78	0.416	-0.619	5.155	0.1	0.213	0.115	5.99949	0.844491	0.00207158	0.00235549	0.00678257	3.08461
2266.55	11.78	0.416	-0.618	5.205	0.1	0.213	0.115	5.99949	0.794491	0.00207158	0.00236186	0.0067953	3.08461
2267.53	11.78	0.416	-0.616	5.255	0.1	0.213	0.115	5.99949	0.744491	0.00207158	0.00237459	0.00682076	3.08461
2268.62	11.78	0.414	-0.615	5.31	0.1	0.213	0.115	5.99949	0.689491	0.00205213	0.00238096	0.00681405	3.08461
2269.61	11.78	0.414	-0.614	5.355	0.1	0.213	0.115	5.99949	0.644491	0.00205213	0.00238732	0.00682678	3.08461
2270.59	11.78	0.414	-0.612	5.41	0.1	0.213	0.115	5.99949	0.589491	0.00205213	0.00240006	0.00685224	3.08461
2271.58	11.78	0.414	-0.611	5.46	0.1	0.213	0.115	5.99949	0.539491	0.00205213	0.00240642	0.00686498	3.08461
2272.56	11.78	0.414	-0.61	5.505	0.1	0.213	0.115	5.99949	0.494491	0.00205213	0.00241279	0.00687771	3.08461
2273.55	11.78	0.414	-0.608	5.555	0.1	0.213	0.115	5.99949	0.444491	0.00205213	0.00242552	0.00690317	3.08461
2274.53	11.78	0.414	-0.607	5.605	0.1	0.213	0.115	5.99949	0.394491	0.00205213	0.00243189	0.0069159	3.08461
2275.62	11.78	0.414	-0.606	5.655	0.1	0.213	0.115	5.99949	0.344491	0.00205213	0.00243825	0.00692864	3.08461
2276.61	11.78	0.414	-0.604	5.71	0.1	0.213	0.115	5.99949	0.289491	0.00205213	0.00245099	0.0069541	3.08461
2277.59	11.78	0.413	-0.603	5.76	0.1	0.213	0.11	5.99949	0.239491	0.0020424	0.00245735	0.00695711	2.9505
2278.58	11.78	0.413	-0.602	5.81	0.1	0.213	0.11	5.99949	0.189491	0.0020424	0.00246372	0.00696984	2.9505
2279.56	11.78	0.413	-0.601	5.85	0.1	0.213	0.11	5.99949	0.149491	0.0020424	0.00247008	0.00698257	2.9505
2280.55	11.78	0.413	-0.599	5.905	0.1	0.213	0.11	5.99949	0.0944907	0.0020424	0.00248282	0.00700804	2.9505
2281.53	11.78	0.413	-0.598	5.955	0.1	0.213	0.11	5.99949	0.0444907	0.0020424	0.00248918	0.00702077	2.9505
2282.62	11.78	0.413	-0.597	6.01	0.1	0.213	0.11	5.99949	-0.0105093	0.0020424	0.00249555	0.0070335	2.9505
2283.61	11.78	0.413	-0.595	6.06	0.1	0.213	0.11	5.99949	-0.0605093	0.0020424	0.00250828	0.00705897	2.9505
2284.59	11.78	0.413	-0.594	6.11	0.1	0.213	0.11	5.99949	-0.110509	0.0020424	0.00251465	0.0070717	2.9505
2285.58	11.78	0.413	-0.593	6.16	0.1	0.213	0.11	5.99949	-0.160509	0.0020424	0.00252101	0.00708443	2.9505
2286.56	11.78	0.411	-0.591	6.205	0.1	0.213	0.11	5.99949	-0.205509	0.00202295	0.00253375	0.00709045	2.9505
2287.55	11.78	0.411	-0.59	6.255	0.1	0.213	0.11	5.99949	-0.255509	0.00202295	0.00254011	0.00710318	2.9505
2288.53	11.78	0.411	-0.589	6.305	0.1	0.213	0.11	5.99949	-0.305509	0.00202295	0.00254648	0.00711591	2.9505
2289.62	11.78	0.411	-0.588	6.355	0.1	0.213	0.11	5.99949	-0.355509	0.00202295	0.00255285	0.00712864	2.9505
2290.61	11.78	0.411	-0.586	6.41	0.1	0.213	0.11	5.99949	-0.410509	0.00202295	0.00256558	0.00715411	2.9505
2291.59	11.76	0.411	-0.585	6.455	0.1	0.213	0.11	5.9893	-0.465695	0.00202295	0.00257194	0.00716684	2.9505
2292.57	11.78	0.411	-0.584	6.515	0.1	0.213	0.11	5.99949	-0.515509	0.00202295	0.00257831	0.00717957	2.9505
2293.56	11.78	0.411	-0.583	6.555	0.1	0.213	0.11	5.99949	-0.555509	0.00202295	0.00258468	0.00719231	2.9505
2294.55	11.78	0.41	-0.582	6.61	0.1	0.213	0.11	5.99949	-0.610509	0.00201323	0.00259104	0.00719531	2.9505
2295.53	11.78	0.41	-0.58	6.655	0.1	0.213	0.11	5.99949	-0.655509	0.00201323	0.00260377	0.00722078	2.9505
2296.62	11.78	0.41	-0.579	6.71	0.1	0.213	0.11	5.99949	-0.710509	0.00201323	0.00261014	0.00723351	2.9505
2297.61	11.78	0.41	-0.578	6.76	0.1	0.213	0.11	5.99949	-0.760509	0.00201323	0.00261651	0.00724624	2.9505
2298.59	11.78	0.41	-0.577	6.81	0.1	0.213	0.11	5.99949	-0.810509	0.00201323	0.00262287	0.00725897	2.9505
2299.58	11.78	0.41	-0.575	6.86	0.1	0.213	0.11	5.99949	-0.860509	0.00201323	0.00263561	0.00728444	2.9505
2300.56	11.78	0.408	-0.574	6.905	0.1	0.213	0.11	5.99949	-0.905509	0.00199378	0.00264197	0.00727772	2.9505
2301.55	11.78	0.408	-0.573	6.95	0.1	0.213	0.11	5.99949	-0.950509	0.00199378	0.00264834	0.00729045	2.9505
2302.53	11.78	0.408	-0.572	7.005	0.1	0.213	0.11	5.99949	-1.00551	0.00199378	0.0026547	0.00730318	2.9505
2303.62	11.78	0.408	-0.571	7.06	0.1	0.213	0.11	5.99949	-1.06051	0.00199378	0.00266107	0.00731592	2.9505
2304.61	11.78	0.408	-0.569	7.11	0.1	0.213	0.11	5.99949	-1.11051	0.00199378	0.0026738	0.00734138	2.9505
2305.59	11.78	0.408	-0.568	7.16	0.1	0.213	0.11	5.99949	-1.16051	0.00199378	0.00268017	0.00735411	2.9505
2306.58	11.78	0.407	-0.567	7.21	0.1	0.213	0.11	5.99949	-1.21051	0.00198405	0.00268654	0.00735712	2.9505
2307.56	11.78	0.407	-0.566	7.255	0.1	0.213	0.11	5.99949	-1.25551	0.00198405	0.0026929	0.00736985	2.9505
2308.55	11.78	0.408	-0.565	7.305	0.1	0.213	0.11	5.99949	-1.30551	0.00199378	0.00269927	0.00739231	2.9505
2309.53	11.76	0.407	-0.563	7.355	0.1	0.213	0.11	5.9893	-1.3657	0.00198405	0.002712	0.00740805	2.9505
2310.62	11.78	0.407	-0.562	7.41	0.1	0.213	0.11	5.99949	-1.41051	0.00198405	0.00271837	0.00742078	2.9505
2311.61	11.74	0.407	-0.561	7.45	0.1	0.213	0.11	5.97912	-1.47088	0.00198405	0.00272473	0.00743352	2.9505
2312.59	11.76	0.407	-0.56	7.505	0.1	0.213	0.11	5.9893	-1.5157	0.00198405	0.0027311	0.00744625	2.9505
2313.58	11.76	0.407	-0.559	7.555	0.1	0.213	0.105	5.9893	-1.5657	0.00198405	0.00273747	0.00745898	2.81638
2314.56	11.78	0.406	-0.558	7.605	0.1	0.213	0.105	5.99949	-1.60551	0.00197432	0.00274383	0.00746199	2.81638
2315.55	11.78	0.407	-0.556	7.655	0.1	0.213	0.105	5.99949	-1.65551	0.00198405	0.00275656	0.00749718	2.81638
2316.53	11.78	0.407	-0.555	7.705	0.1	0.213	0.105	5.99949	-1.70551	0.00198405	0.00276293	0.00750991	2.81638
2317.62	11.78	0.406	-0.554	7.76	0.1	0.213	0.105	5.99949	-1.76051	0.00197432	0.0027693	0.00751292	2.81638
2318.61	11.78	0.406	-0.553	7.81	0.1	0.213	0.105	5.99949	-1.81051	0.00197432	0.00277566	0.00752565	2.81638
2319.59	11.78	0.406	-0.552	7.86	0.1	0.213	0.105	5.99949	-1.86051	0.00197432	0.00278203	0.00753838	2.81638
2320.58	11.78	0.406	-0.55	7.91	0.1	0.213	0.105	5.99949	-1.91051	0.00197432	0.00279476	0.00756385	2.81638
2321.56	11.76	0.406	-0.549	7.95	0.1	0.213	0.105	5.9893	-1.9607	0.00197432	0.00280113	0.00757658	2.81638
2322.55	11.76	0.404	-0.548	8	0.1	0.213	0.105	5.9893	-2.0107	0.00195487	0.00280749	0.00756986	2.81638
2323.53	11.76	0.404	-0.547	8.055	0.1	0.213	0.105	5.9893	-2.0657	0.00195487	0.00281386	0.00758259	2.81638
2324.62	11.78	0.404	-0.546	8.11	0.1	0.213	0.105	5.99949	-2.11051	0.00195487	0.00282023	0.00759532	2.81638
2325.61	11.78	0.404	-0.544	8.16	0.1	0.213	0.105	5.99949	-2.16051	0.00195487	0.00283296	0.00762079	2.81638
2326.59	11.76	0.404	-0.543	8.205	0.1	0.213	0.105	5.9893	-2.2157	0.00195487	0.00283932	0.00763352	2.81638
2327.57	11.76	0.404	-0.542	8.26	0.1	0.213	0.105	5.9893	-2.2707	0.00195487	0.00284569	0.00764625	2.81638
2328.56	11.78	0.404	-0.541	8.305	0.1	0.213	0.105	5.99949	-2.30551	0.00195487	0.00285206	0.00765899	2.81638
2329.55	11.76	0.404	-0.54	8.355	0.1	0.213	0.105	5.9893	-2.3657	0.00195487	0.00285842	0.00767172	2.81638
2330.53	11.78	0.403	-0.538	8.405	0.1	0.213	0.105	5.99949	-2.40551	0.00194515	0.00287116	0.00768746	2.81638
2331.62	11.76	0.403	-0.537	8.445	0.1	0.213	0.105	5.9893	-2.4557	0.00194515	0.00287752	0.00770019	2.81638
2332.61	11.78	0.403	-0.536	8.365	0.1	0.213	0.105	5.99949	-2.36551	0.00194515	0.00288389	0.00771292	2.81638
2333.59	11.78	0.403	-0.536	8.285	0.1	0.213	0.105	5.99949	-2.28551	0.00194515	0.00288389	0.00771292	2.81638
2334.58	11.78	0.403	-0.536	8.31	0.1	0.213	0.105	5.99949	-2.31051	0.00194515	0.00288389	0.00771292	2.81638
2335.56	11.78	0.403	-0.536	8.355	0.1	0.213	0.105	5.99949	-2.35551	0.00194515	0.00288389	0.00771292	2.81638
2336.55	11.8	0.403	-0.536	8.39	0.1	0.213	0.105	6.00968	-2.38032	0.00194515	0.00288389	0.00771292	2.81638
2337.53	11.8	0.404	-0.536	8.41	0.1	0.213	0.105	6.00968	-2.40032	0.00195487	0.00288389	0.00772265	2.81638
2338.62	11.8	0.403	-0.535	8.43	0.1	0.213	0.105	6.00968	-2.42032	0.00194515	0.00289025	0.00772565	2.81638
2339.61	11.8	0.404	-0.535	8.44	0.1	0.213	0.105	6.00968	-2.43032	0.00195487	0.00289025	0.00773538	2.81638
2340.59	11.8	0.403	-0.534	8.455	0.1	0.213	0.105	6.00968	-2.44532	0.00194515	0.00289662	0.00773839	2.81638
2341.58	11.78	0.403	-0.534	8.46	0.1	0.213	0.105	5.99949	-2.46051	0.00194515	0.00289662	0.00773839	2.81638
2342.56	11.78	0.403	-0.534	8.475	0.1	0.213	0.105	5.99949	-2.47551	0.00194515	0.00289662	0.00773839	2.81638
2343.55	11.78	0.403	-0.533	8.48	0.1	0.213	0.105	5.99949	-2.48051	0.00194515	0.00290299	0.00775112	2.81638
2344.53	11.78	0.403	-0.533	8.495	0.1	0.213	0.105	5.99949	-2.49551	0.00194515	0.00290299	0.00775112	2.81638
2345.62	11.78	0.403	-0.533	8.5	0.1	0.213	0.105	5.99949	-2.50051	0.00194515	0.00290299	0.00775112	2.81638
2346.61	11.78	0.403	-0.533	8.51	0.1	0.213	0.105	5.99949	-2.51051	0.00194515	0.00290299	0.00775112	2.81638
2347.59	11.78	0.403	-0.532	8.515	0.1	0.213	0.105	5.99949	-2.51551	0.00194515	0.00290935	0.00776385	2.81638
2348.58	11.78	0.403	-0.532	8.52	0.1	0.213	0.105	5.99949	-2.52051	0.00194515	0.00290935	0.00776385	2.81638
2349.56	11.78	0.403	-0.532	8.53	0.1	0.213	0.105	5.99949	-2.53051	0.00194515	0.00290935	0.00776385	2.81638
2350.55	11.78	0.403	-0.532	8.54	0.1	0.213	0.105	5.99949	-2.54051	0.00194515	0.00290935	0.00776385	2.81638
2351.53	11.78	0.403	-0.531	8.54	0.1	0.213	0.105	5.99949	-2.54051	0.00194515	0.00291572	0.00777658	2.81638
2352.62	11.78	0.403	-0.531	8.55	0.1	0.213	0.105	5.99949	-2.55051	0.00194515	0.00291572	0.00777658	2.81638
2353.61	11.78	0.403	-0.531	8.555	0.1	0.213	0.105	5.99949	-2.55551	0.00194515	0.00291572	0.00777658	2.81638
2354.59	11.78	0.403	-0.531	8.56	0.1	0.213	0.105	5.99949	-2.56051	0.00194515	0.00291572	0.00777658	2.81638
2355.58	11.78	0.403	-0.531	8.565	0.1	0.213	0.105	5.99949	-2.56551	0.00194515	0.00291572	0.00777658	2.81638
2356.56	11.78	0.403	-0.53	8.57	0.1	0.213	0.105	5.99949	-2.57051	0.00194515	0.00292208	0.00778932	2.81638
2357.55	11.78	0.403	-0.53	8.575	0.1	0.213	0.105	5.99949	-2.57551	0.00194515	0.00292208	0.00778932	2.81638
2358.53	11.78	0.403	-0.53	8.58	0.1	0.213	0.105	5.99949	-2.58051	0.00194515	0.00292208	0.00778932	2.81638
2359.62	11.78	0.403	-0.53	8.58	0.1	0.213	0.105	5.99949	-2.58051	0.00194515	0.00292208	0.00778932	2.81638
2360.61	11.78	0.403	-0.53	8.585	0.1	0.213	0.105	5.99949	-2.58551	0.00194515	0.00292208	0.00778932	2.81638
2361.59	11.78	0.403	-0.53	8.585	0.1	0.213	0.105	5.99949	-2.58551	0.00194515	0.00292208	0.00778932	2.81638
2362.57	11.78	0.403	-0.53	8.59	0.1	0.213	0.105	5.99949	-2.59051	0.00194515	0.00292208	0.00778932	2.81638
2363.56	11.76	0.403	-0.529	8.59	0.1	0.213	0.105	5.9893	-2.6007	0.00194515	0.00292845	0.00780205	2.81638
2364.55	11.76	0.403	-0.529	8.6	0.1	0.213	0.105	5.9893	-2.6107	0.00194515	0.00292845	0.00780205	2.81638
2365.53	11.76	0.403	-0.529	8.6	0.1	0.213	0.105	5.9893	-2.6107	0.00194515	0.00292845	0.00780205	2.81638
2366.62	11.78	0.403	-0.529	8.595	0.1	0.213	0.105	5.99949	-2.59551	0.00194515	0.00292845	0.00780205	2.81638
2367.61	11.76	0.403	-0.529	8.6	0.1	0.213	0.105	5.9893	-2.6107	0.00194515	0.00292845	0.00780205	2.81638
2368.59	11.76	0.401	-0.529	8.6	0.1	0.213	0.105	5.9893	-2.6107	0.0019257	0.00292845	0.0077826	2.81638
2369.58	11.76	0.403	-0.529	8.6	0.1	0.213	0.105	5.9893	-2.6107	0.00194515	0.00292845	0.00780205	2.81638
2370.56	11.76	0.403	-0.529	8.6	0.1	0.213	0.105	5.9893	-2.6107	0.00194515	0.00292845	0.00780205	2.81638
2371.54	11.78	0.403	-0.529	8.6	0.1	0.213	0.105	5.99949	-2.60051	0.00194515	0.00292845	0.00780205	2.81638
2372.53	11.78	0.403	-0.528	8.6	0.1	0.213	0.105	5.99949	-2.60051	0.00194515	0.00293482	0.00781478	2.81638
2373.62	11.78	0.403	-0.528	8.6	0.1	0.213	0.105	5.99949	-2.60051	0.00194515	0.00293482	0.00781478	2.81638
2374.61	11.78	0.403	-0.528	8.6	0.1	0.213	0.105	5.99949	-2.60051	0.00194515	0.00293482	0.00781478	2.81638
2375.59	11.78	0.403	-0.528	8.6	0.1	0.213	0.105	5.99949	-2.60051	0.00194515	0.00293482	0.00781478	2.81638
2376.58	11.78	0.403	-0.528	8.605	0.1	0.213	0.105	5.99949	-2.60551	0.00194515	0.00293482	0.00781478	2.81638
2377.56	11.78	0.403	-0.528	8.6	0.1	0.213	0.105	5.99949	-2.60051	0.00194515	0.00293482	0.00781478	2.81638
2378.55	11.78	0.403	-0.528	8.6	0.1	0.213	0.105	5.99949	-2.60051	0.00194515	0.00293482	0.00781478	2.81638
2379.53	11.78	0.403	-0.528	8.6	0.1	0.213	0.105	5.99949	-2.60051	0.00194515	0.00293482	0.00781478	2.81638
2380.62	11.78	0.403	-0.528	8.605	0.1	0.213	0.105	5.99949	-2.60551	0.00194515	0.00293482	0.00781478	2.81638
2381.61	11.78	0.403	-0.528	8.6	0.1	0.213	0.105	5.99949	-2.60051	0.00194515	0.00293482	0.00781478	2.81638
2382.59	11.78	0.403	-0.528	8.6	0.1	0.213	0.105	5.99949	-2.60051	0.00194515	0.00293482	0.00781478	2.81638
2383.58	11.78	0.403	-0.528	8.6	0.1	0.213	0.105	5.99949	-2.60051	0.00194515	0.00293482	0.00781478	2.81638
2384.56	11.78	0.403	-0.528	8.6	0.1	0.213	0.105	5.99949	-2.60051	0.00194515	0.00293482	0.00781478	2.81638
2385.55	11.78	0.403	-0.528	8.6	0.1	0.213	0.105	5.99949	-2.60051	0.00194515	0.00293482	0.00781478	2.81638
2386.53	11.78	0.403	-0.528	8.6	0.1	0.213	0.105	5.99949	-2.60051	0.00194515	0.00293482	0.00781478	2.81638
2387.62	11.78	0.403	-0.528	8.6	0.1	0.213	0.105	5.99949	-2.60051	0.00194515	0.00293482	0.00781478	2.81638
2388.61	11.78	0.403	-0.527	8.605	0.1	0.213	0.105	5.99949	-2.60551	0.00194515	0.00294118	0.00782751	2.81638
2389.59	11.78	0.403	-0.527	8.605	0.1	0.213	0.105	5.99949	-2.60551	0.00194515	0.00294118	0.00782751	2.81638
2390.58	11.78	0.403	-0.527	8.605	0.1	0.213	0.105	5.99949	-2.60551	0.00194515	0.00294118	0.00782751	2.81638
2391.56	11.8	0.403	-0.527	8.605	0.1	0.213	0.105	6.00968	-2.59532	0.00194515	0.00294118	0.00782751	2.81638
2392.55	11.8	0.403	-0.527	8.6	0.1	0.213	0.105	6.00968	-2.59032	0.00194515	0.00294118	0.00782751	2.81638
2393.53	11.8	0.403	-0.527	8.6	0.1	0.213	0.105	6.00968	-2.59032	0.00194515	0.00294118	0.00782751	2.81638
2394.62	11.8	0.403	-0.527	8.6	0.1	0.213	0.105	6.00968	-2.59032	0.00194515	0.00294118	0.00782751	2.81638
2395.61	11.8	0.403	-0.527	8.6	0.1	0.213	0.105	6.00968	-2.59032	0.00194515	0.00294118	0.00782751	2.81638
2396.59	11.8	0.403	-0.527	8.6	0.1	0.213	0.105	6.00968	-2.59032	0.00194515	0.00294118	0.00782751	2.81638
2397.57	11.78	0.403	-0.527	8.595	0.1	0.213	0.105	5.99949	-2.59551	0.00194515	0.00294118	0.00782751	2.81638
2398.56	11.78	0.403	-0.527	8.6	0.1	0.213	0.105	5.99949	-2.60051	0.00194515	0.00294118	0.00782751	2.81638
2399.55	11.78	0.403	-0.527	8.6	0.1	0.213	0.105	5.99949	-2.60051	0.00194515	0.00294118	0.00782751	2.81638
2400.53	11.78	0.403	-0.527	8.6	0.1	0.213	0.105	5.99949	-2.60051	0.00194515	0.00294118	0.00782751	2.81638
2401.62	11.78	0.403	-0.527	8.6	0.1	0.213	0.105	5.99949	-2.60051	0.00194515	0.00294118	0.00782751	2.81638
2402.61	11.78	0.403	-0.527	8.605	0.1	0.213	0.105	5.99949	-2.60551	0.00194515	0.00294118	0.00782751	2.81638
2403.59	11.78	0.403	-0.527	8.6	0.1	0.213	0.105	5.99949	-2.60051	0.00194515	0.00294118	0.00782751	2.81638
2404.58	11.78	0.403	-0.527	8.605	0.1	0.213	0.105	5.99949	-2.60551	0.00194515	0.00294118	0.00782751	2.81638
2405.56	11.78	0.403	-0.527	8.6	0.1	0.213	0.105	5.99949	-2.60051	0.00194515	0.00294118	0.00782751	2.81638
2406.55	11.78	0.403	-0.527	8.6	0.1	0.213	0.105	5.99949	-2.60051	0.00194515	0.00294118	0.00782751	2.81638
2407.53	11.78	0.403	-0.527	8.595	0.1	0.213	0.105	5.99949	-2.59551	0.00194515	0.00294118	0.00782751	2.81638
2408.62	11.78	0.403	-0.527	8.6	0.1	0.213	0.105	5.99949	-2.60051	0.00194515	0.00294118	0.00782751	2.81638
2409.61	11.78	0.403	-0.527	8.6	0.1	0.213	0.105	5.99949	-2.60051	0.00194515	0.00294118	0.00782751	2.81638
2410.59	11.78	0.403	-0.527	8.605	0.1	0.213	0.105	5.99949	-2.60551	0.00194515	0.00294118	0.00782751	2.81638
2411.58	11.78	0.403	-0.527	8.6	0.1	0.213	0.105	5.99949	-2.60051	0.00194515	0.00294118	0.00782751	2.81638
2412.56	11.78	0.403	-0.527	8.6	0.1	0.213	0.105	5.99949	-2.60051	0.00194515	0.00294118	0.00782751	2.81638
2413.55	11.78	0.403	-0.527	8.6	0.1	0.213	0.105	5.99949	-2.60051	0.00194515	0.00294118	0.00782751	2.81638
2414.53	11.78	0.403	-0.527	8.6	0.1	0.213	0.105	5.99949	-2.60051	0.00194515	0.00294118	0.00782751	2.81638
2415.62	11.78	0.403	-0.526	8.595	0.1	0.213	0.105	5.99949	-2.59551	0.00194515	0.00294755	0.00784025	2.81638
2416.61	11.78	0.403	-0.526	8.595	0.1	0.213	0.105	5.99949	-2.59551	0.00194515	0.00294755	0.00784025	2.81638
2417.59	11.78	0.403	-0.526	8.595	0.1	0.213	0.105	5.99949	-2.59551	0.00194515	0.00294755	0.00784025	2.81638
2418.58	11.78	0.403	-0.526	8.6	0.1	0.213	0.105	5.99949	-2.60051	0.00194515	0.00294755	0.00784025	2.81638
2419.56	11.78	0.403	-0.526	8.6	0.1	0.213	0.105	5.99949	-2.60051	0.00194515	0.00294755	0.00784025	2.81638
2420.55	11.78	0.403	-0.526	8.6	0.1	0.213	0.105	5.99949	-2.60051	0.00194515	0.00294755	0.00784025	2.81638
2421.53	11.78	0.403	-0.526	8.605	0.1	0.213	0.105	5.99949	-2.60551	0.00194515	0.00294755	0.00784025	2.81638
2422.62	11.78	0.403	-0.526	8.605	0.1	0.213	0.105	5.99949	-2.60551	0.00194515	0.00294755	0.00784025	2.81638
2423.61	11.78	0.403	-0.526	8.6	0.1	0.213	0.105	5.99949	-2.60051	0.00194515	0.00294755	0.00784025	2.81638
2424.59	11.78	0.403	-0.526	8.605	0.1	0.213	0.105	5.99949	-2.60551	0.00194515	0.00294755	0.00784025	2.81638
2425.58	11.78	0.403	-0.526	8.6	0.1	0.213	0.105	5.99949	-2.60051	0.00194515	0.00294755	0.00784025	2.81638
2426.56	11.78	0.403	-0.526	8.6	0.1	0.213	0.105	5.99949	-2.60051	0.00194515	0.00294755	0.00784025	2.81638
2427.55	11.78	0.403	-0.526	8.595	0.1	0.213	0.105	5.99949	-2.59551	0.00194515	0.00294755	0.00784025	2.81638
2428.53	11.78	0.403	-0.526	8.6	0.1	0.213	0.105	5.99949	-2.60051	0.00194515	0.00294755	0.00784025	2.81638
2429.62	11.78	0.403	-0.526	8.6	0.1	0.213	0.105	5.99949	-2.60051	0.00194515	0.00294755	0.00784025	2.81638
2430.61	11.78	0.403	-0.526	8.6	0.1	0.213	0.105	5.99949	-2.60051	0.00194515	0.00294755	0.00784025	2.81638
2431.59	11.78	0.403	-0.526	8.6	0.1	0.213	0.105	5.99949	-2.60051	0.00194515	0.00294755	0.00784025	2.81638
2432.58	11.78	0.403	-0.526	8.6	0.1	0.213	0.105	5.99949	-2.60051	0.00194515	0.00294755	0.00784025	2.81638
2433.56	11.78	0.403	-0.526	8.6	0.1	0.213	0.105	5.99949	-2.60051	0.00194515	0.00294755	0.00784025	2.81638
2434.55	11.78	0.403	-0.526	8.6	0.1	0.213	0.105	5.99949	-2.60051	0.00194515	0.00294755	0.00784025	2.81638
2435.53	11.78	0.403	-0.526	8.6	0.1	0.213	0.105	5.99949	-2.60051	0.00194515	0.00294755	0.00784025	2.81638
2436.62	11.78	0.403	-0.526	8.6	0.1	0.213	0.105	5.99949	-2.60051	0.00194515	0.00294755	0.00784025	2.81638
2437.61	11.78	0.403	-0.526	8.6	0.1	0.213	0.105	5.99949	-2.60051	0.00194515	0.00294755	0.00784025	2.81638
2438.59	11.82	0.404	-0.526	8.63	0.1	0.213	0.105	6.01986	-2.61014	0.00195487	0.00294755	0.00784997	2.81638
2439.58	11.88	0.404	-0.526	8.63	0.1	0.213	0.105	6.05042	-2.57958	0.00195487	0.00294755	0.00784997	2.81638
2440.56	11.9	0.403	-0.526	8.62	0.1	0.213	0.105	6.06061	-2.55939	0.00194515	0.00294755	0.00784025	2.81638
2441.55	11.88	0.404	-0.526	8.61	0.1	0.213	0.105	6.05042	-2.55958	0.00195487	0.00294755	0.00784997	2.81638
2442.53	11.86	0.404	-0.526	8.605	0.1	0.213	0.105	6.04023	-2.56477	0.00195487	0.00294755	0.00784997	2.81638
2443.62	11.84	0.404	-0.526	8.6	0.1	0.213	0.105	6.03005	-2.56995	0.00195487	0.00294755	0.00784997	2.81638
2444.61	11.82	0.403	-0.526	8.6	0.1	0.213	0.105	6.01986	-2.58014	0.00194515	0.00294755	0.00784025	2.81638
2445.59	11.82	0.404	-0.526	8.6	0.1	0.213	0.105	6.01986	-2.58014	0.00195487	0.00294755	0.00784997	2.81638
2446.58	11.8	0.403	-0.526	8.6	0.1	0.213	0.105	6.00968	-2.59032	0.00194515	0.00294755	0.00784025	2.81638
2447.56	11.8	0.404	-0.526	8.6	0.1	0.213	0.105	6.00968	-2.59032	0.00195487	0.00294755	0.00784997	2.81638
2448.55	11.8	0.404	-0.526	8.6	0.1	0.213	0.105	6.00968	-2.59032	0.00195487	0.00294755	0.00784997	2.81638
2449.53	11.8	0.404	-0.526	8.6	0.1	0.213	0.105	6.00968	-2.59032	0.00195487	0.00294755	0.00784997	2.81638
2450.62	11.8	0.404	-0.526	8.6	0.1	0.213	0.105	6.00968	-2.59032	0.00195487	0.00294755	0.00784997	2.81638
2451.61	11.8	0.404	-0.526	8.6	0.1	0.213	0.105	6.00968	-2.59032	0.00195487	0.00294755	0.00784997	2.81638
2452.59	11.78	0.404	-0.526	8.6	0.1	0.213	0.105	5.99949	-2.60051	0.00195487	0.00294755	0.00784997	2.81638
2453.58	11.78	0.403	-0.526	8.6	0.1	0.213	0.105	5.99949	-2.60051	0.00194515	0.00294755	0.00784025	2.81638
2454.56	11.78	0.403	-0.526	8.6	0.1	0.213	0.105	5.99949	-2.60051	0.00194515	0.00294755	0.00784025	2.81638
2455.55	11.78	0.403	-0.526	8.6	0.1	0.213	0.105	5.99949	-2.60051	0.00194515	0.00294755	0.00784025	2.81638
2456.53	11.78	0.404	-0.525	8.6	0.1	0.213	0.105	5.99949	-2.60051	0.00195487	0.00295392	0.0078627	2.81638
2457.62	11.78	0.403	-0.525	8.6	0.1	0.213	0.105	5.99949	-2.60051	0.00194515	0.00295392	0.00785298	2.81638
2458.61	11.76	0.404	-0.525	8.6	0.1	0.213	0.105	5.9893	-2.6107	0.00195487	0.00295392	0.0078627	2.81638
2459.59	11.76	0.404	-0.525	8.595	0.1	0.213	0.105	5.9893	-2.6057	0.00195487	0.00295392	0.0078627	2.81638
2460.58	11.76	0.403	-0.525	8.595	0.1	0.213	0.105	5.9893	-2.6057	0.00194515	0.00295392	0.00785298	2.81638
2461.56	11.78	0.404	-0.525	8.6	0.1	0.213	0.105	5.99949	-2.60051	0.00195487	0.00295392	0.0078627	2.81638
2462.54	11.78	0.403	-0.525	8.6	0.1	0.213	0.105	5.99949	-2.60051	0.00194515	0.00295392	0.00785298	2.81638
2463.53	11.78	0.403	-0.525	8.6	0.1	0.213	0.105	5.99949	-2.60051	0.00194515	0.00295392	0.00785298	2.81638
2464.62	11.78	0.403	-0.525	8.605	0.1	0.213	0.105	5.99949	-2.60551	0.00194515	0.00295392	0.00785298	2.81638
2465.61	11.8	0.403	-0.525	8.605	0.1	0.213	0.105	6.00968	-2.59532	0.00194515	0.00295392	0.00785298	2.81638
2466.59	11.8	0.403	-0.525	8.6	0.1	0.213	0.105	6.00968	-2.59032	0.00194515	0.00295392	0.00785298	2.81638
2467.58	11.8	0.403	-0.525	8.6	0.1	0.213	0.105	6.00968	-2.59032	0.00194515	0.00295392	0.00785298	2.81638
2468.56	11.8	0.403	-0.525	8.6	0.1	0.213	0.105	6.00968	-2.59032	0.00194515	0.00295392	0.00785298	2.81638
2469.55	11.8	0.403	-0.525	8.6	0.1	0.213	0.105	6.00968	-2.59032	0.00194515	0.00295392	0.00785298	2.81638
2470.53	11.8	0.404	-0.525	8.6	0.1	0.213	0.105	6.00968	-2.59032	0.00195487	0.00295392	0.0078627	2.81638
2471.62	11.78	0.404	-0.525	8.6	0.1	0.213	0.105	5.99949	-2.60051	0.00195487	0.00295392	0.0078627	2.81638
2472.61	11.78	0.404	-0.525	8.6	0.1	0.213	0.105	5.99949	-2.60051	0.00195487	0.00295392	0.0078627	2.81638
2473.59	11.78	0.404	-0.525	8.595	0.1	0.213	0.105	5.99949	-2.59551	0.00195487	0.00295392	0.0078627	2.81638
2474.58	11.78	0.403	-0.525	8.6	0.1	0.213	0.105	5.99949	-2.60051	0.00194515	0.00295392	0.00785298	2.81638
2475.56	11.78	0.403	-0.525	8.6	0.1	0.213	0.105	5.99949	-2.60051	0.00194515	0.00295392	0.00785298	2.81638
2476.54	11.78	0.404	-0.525	8.6	0.1	0.213	0.105	5.99949	-2.60051	0.00195487	0.00295392	0.0078627	2.81638
2477.53	11.78	0.404	-0.525	8.6	0.1	0.213	0.105	5.99949	-2.60051	0.00195487	0.00295392	0.0078627	2.81638
2478.62	11.78	0.404	-0.525	8.6	0.1	0.213	0.105	5.99949	-2.60051	0.00195487	0.00295392	0.0078627	2.81638
2479.61	11.78	0.404	-0.525	8.6	0.1	0.213	0.105	5.99949	-2.60051	0.00195487	0.00295392	0.0078627	2.81638
2480.59	11.78	0.404	-0.525	8.6	0.1	0.213	0.105	5.99949	-2.60051	0.00195487	0.00295392	0.0078627	2.81638
2481.58	11.78	0.404	-0.525	8.6	0.1	0.213	0.105	5.99949	-2.60051	0.00195487	0.00295392	0.0078627	2.81638
2482.56	11.78	0.404	-0.525	8.6	0.1	0.213	0.105	5.99949	-2.60051	0.00195487	0.00295392	0.0078627	2.81638
2483.55	11.78	0.404	-0.525	8.6	0.1	0.213	0.105	5.99949	-2.60051	0.00195487	0.00295392	0.0078627	2.81638
2484.53	11.78	0.403	-0.525	8.6	0.1	0.213	0.105	5.99949	-2.60051	0.00194515	0.00295392	0.00785298	2.81638
2485.62	11.78	0.403	-0.525	8.6	0.1	0.213	0.105	5.99949	-2.60051	0.00194515	0.00295392	0.00785298	2.81638
2486.61	11.78	0.404	-0.525	8.6	0.1	0.213	0.105	5.99949	-2.60051	0.00195487	0.00295392	0.0078627	2.81638
2487.59	11.78	0.403	-0.525	8.6	0.1	0.213	0.105	5.99949	-2.60051	0.00194515	0.00295392	0.00785298	2.81638
2488.58	11.78	0.404	-0.525	8.6	0.1	0.213	0.105	5.99949	-2.60051	0.00195487	0.00295392	0.0078627	2.81638
2489.56	11.78	0.404	-0.525	8.6	0.1	0.213	0.105	5.99949	-2.60051	0.00195487	0.00295392	0.0078627	2.81638
2490.55	11.78	0.404	-0.525	8.6	0.1	0.213	0.105	5.99949	-2.60051	0.00195487	0.00295392	0.0078627	2.81638
2491.53	11.78	0.404	-0.525	8.6	0.1	0.213	0.1	5.99949	-2.60051	0.00195487	0.00295392	0.0078627	2.68227
2492.62	11.78	0.404	-0.525	8.6	0.1	0.213	0.1	5.99949	-2.60051	0.00195487	0.00295392	0.0078627	2.68227
2493.61	11.78	0.404	-0.525	8.6	0.1	0.213	0.1	5.99949	-2.60051	0.00195487	0.00295392	0.0078627	2.68227
2494.59	11.78	0.404	-0.525	8.6	0.1	0.213	0.1	5.99949	-2.60051	0.00195487	0.00295392	0.0078627	2.68227
2495.58	11.78	0.404	-0.525	8.6	0.1	0.213	0.1	5.99949	-2.60051	0.00195487	0.00295392	0.0078627	2.68227
2496.56	11.78	0.404	-0.525	8.6	0.1	0.213	0.1	5.99949	-2.60051	0.00195487	0.00295392	0.0078627	2.68227
2497.55	11.78	0.404	-0.525	8.6	0.1	0.213	0.1	5.99949	-2.60051	0.00195487	0.00295392	0.0078627	2.68227
2498.53	11.78	0.404	-0.525	8.6	0.1	0.213	0.1	5.99949	-2.60051	0.00195487	0.00295392	0.0078627	2.68227
2499.62	11.78	0.404	-0.525	8.6	0.1	0.213	0.1	5.99949	-2.60051	0.00195487	0.00295392	0.0078627	2.68227
2500.61	11.78	0.404	-0.524	8.6	0.1	0.213	0.1	5.99949	-2.60051	0.00195487	0.00296028	0.00787544	2.68227
2501.59	11.78	0.404	-0.524	8.6	0.1	0.213	0.1	5.99949	-2.60051	0.00195487	0.00296028	0.00787544	2.68227
2502.57	11.78	0.403	-0.524	8.6	0.1	0.213	0.1	5.99949	-2.60051	0.00194515	0.00296028	0.00786571	2.68227
2503.56	11.78	0.404	-0.524	8.6	0.1	0.213	0.1	5.99949	-2.60051	0.00195487	0.00296028	0.00787544	2.68227
2504.55	11.78	0.404	-0.524	8.6	0.1	0.213	0.1	5.99949	-2.60051	0.00195487	0.00296028	0.00787544	2.68227
2505.53	11.78	0.404	-0.524	8.6	0.1	0.213	0.1	5.99949	-2.60051	0.00195487	0.00296028	0.00787544	2.68227
2506.62	11.78	0.404	-0.524	8.6	0.1	0.213	0.1	5.99949	-2.60051	0.00195487	0.00296028	0.00787544	2.68227
2507.61	11.78	0.404	-0.524	8.6	0.1	0.213	0.1	5.99949	-2.60051	0.00195487	0.00296028	0.00787544	2.68227
2508.59	11.78	0.404	-0.524	8.6	0.1	0.213	0.1	5.99949	-2.60051	0.00195487	0.00296028	0.00787544	2.68227
2509.58	11.78	0.404	-0.524	8.6	0.1	0.213	0.1	5.99949	-2.60051	0.00195487	0.00296028	0.00787544	2.68227
2510.56	11.78	0.404	-0.524	8.6	0.1	0.213	0.1	5.99949	-2.60051	0.00195487	0.00296028	0.00787544	2.68227
2511.55	11.78	0.404	-0.524	8.57	0.1	0.213	0.1	5.99949	-2.57051	0.00195487	0.00296028	0.00787544	2.68227
2512.53	11.78	0.404	-0.524	8.54	0.1	0.213	0.1	5.99949	-2.54051	0.00195487	0.00296028	0.00787544	2.68227
2513.62	11.78	0.404	-0.525	8.485	0.1	0.213	0.1	5.99949	-2.48551	0.00195487	0.00295392	0.0078627	2.68227
2514.61	11.78	0.404	-0.525	8.425	0.1	0.213	0.1	5.99949	-2.42551	0.00195487	0.00295392	0.0078627	2.68227
2515.59	11.78	0.404	-0.525	8.375	0.1	0.213	0.1	5.99949	-2.37551	0.00195487	0.00295392	0.0078627	2.68227
2516.58	11.78	0.404	-0.525	8.315	0.1	0.213	0.1	5.99949	-2.31551	0.00195487	0.00295392	0.0078627	2.68227
2517.56	11.78	0.404	-0.526	8.27	0.1	0.213	0.1	5.99949	-2.27051	0.00195487	0.00294755	0.00784997	2.68227
2518.55	11.78	0.404	-0.526	8.215	0.1	0.213	0.1	5.99949	-2.21551	0.00195487	0.00294755	0.00784997	2.68227
2519.53	11.78	0.404	-0.526	8.17	0.1	0.213	0.1	5.99949	-2.17051	0.00195487	0.00294755	0.00784997	2.68227
2520.62	11.78	0.403	-0.527	8.115	0.1	0.213	0.1	5.99949	-2.11551	0.00194515	0.00294118	0.00782751	2.68227
2521.61	11.78	0.404	-0.527	8.065	0.1	0.213	0.1	5.99949	-2.06551	0.00195487	0.00294118	0.00783724	2.68227
2522.59	11.78	0.404	-0.527	8.01	0.1	0.213	0.1	5.99949	-2.01051	0.00195487	0.00294118	0.00783724	2.68227
2523.57	11.78	0.404	-0.528	7.965	0.1	0.213	0.1	5.99949	-1.96551	0.00195487	0.00293482	0.00782451	2.68227
2524.56	11.78	0.404	-0.528	7.915	0.1	0.213	0.1	5.99949	-1.91551	0.00195487	0.00293482	0.00782451	2.68227
2525.55	11.78	0.404	-0.528	7.865	0.1	0.213	0.1	5.99949	-1.86551	0.00195487	0.00293482	0.00782451	2.68227
2526.53	11.78	0.404	-0.528	7.815	0.1	0.213	0.1	5.99949	-1.81551	0.00195487	0.00293482	0.00782451	2.68227
2527.62	11.78	0.404	-0.529	7.765	0.1	0.213	0.1	5.99949	-1.76551	0.00195487	0.00292845	0.00781177	2.68227
2528.61	11.78	0.404	-0.529	7.71	0.1	0.213	0.1	5.99949	-1.71051	0.00195487	0.00292845	0.00781177	2.68227
2529.59	11.76	0.404	-0.53	7.665	0.1	0.213	0.1	5.9893	-1.6757	0.00195487	0.00292208	0.00779904	2.68227
2530.58	11.76	0.404	-0.53	7.61	0.1	0.213	0.1	5.9893	-1.6207	0.00195487	0.00292208	0.00779904	2.68227
2531.56	11.76	0.404	-0.53	7.565	0.1	0.213	0.1	5.9893	-1.5757	0.00195487	0.00292208	0.00779904	2.68227
2532.55	11.76	0.404	-0.531	7.515	0.1	0.213	0.1	5.9893	-1.5257	0.00195487	0.00291572	0.00778631	2.68227
2533.53	11.76	0.403	-0.531	7.465	0.1	0.213	0.1	5.9893	-1.4757	0.00194515	0.00291572	0.00777658	2.68227
2534.62	11.76	0.404	-0.531	7.41	0.1	0.213	0.1	5.9893	-1.4207	0.00195487	0.00291572	0.00778631	2.68227
2535.61	11.76	0.404	-0.532	7.365	0.1	0.213	0.1	5.9893	-1.3757	0.00195487	0.00290935	0.00777358	2.68227
2536.59	11.76	0.404	-0.532	7.31	0.1	0.213	0.1	5.9893	-1.3207	0.00195487	0.00290935	0.00777358	2.68227
2537.58	11.78	0.404	-0.533	7.265	0.1	0.213	0.1	5.99949	-1.26551	0.00195487	0.00290299	0.00776084	2.68227
2538.56	11.78	0.404	-0.533	7.21	0.1	0.213	0.1	5.99949	-1.21051	0.00195487	0.00290299	0.00776084	2.68227
2539.55	11.76	0.404	-0.533	7.17	0.1	0.213	0.1	5.9893	-1.1807	0.00195487	0.00290299	0.00776084	2.68227
2540.53	11.78	0.404	-0.534	7.115	0.1	0.213	0.1	5.99949	-1.11551	0.00195487	0.00289662	0.00774811	2.68227
2541.62	11.78	0.404	-0.534	7.065	0.1	0.213	0.1	5.99949	-1.06551	0.00195487	0.00289662	0.00774811	2.68227
2542.61	11.78	0.406	-0.535	7.01	0.1	0.213	0.1	5.99949	-1.01051	0.00197432	0.00289025	0.00775483	2.68227
2543.59	11.78	0.406	-0.535	6.97	0.1	0.213	0.1	5.99949	-0.970509	0.00197432	0.00289025	0.00775483	2.68227
2544.58	11.78	0.404	-0.536	6.915	0.1	0.213	0.1	5.99949	-0.915509	0.00195487	0.00288389	0.00772265	2.68227
2545.56	11.78	0.406	-0.536	6.87	0.1	0.213	0.1	5.99949	-0.870509	0.00197432	0.00288389	0.0077421	2.68227
2546.55	11.78	0.406	-0.537	6.82	0.1	0.213	0.1	5.99949	-0.820509	0.00197432	0.00287752	0.00772937	2.68227
2547.53	11.78	0.406	-0.537	6.765	0.1	0.213	0.1	5.99949	-0.765509	0.00197432	0.00287752	0.00772937	2.68227
2548.62	11.78	0.406	-0.538	6.715	0.1	0.213	0.105	5.99949	-0.715509	0.00197432	0.00287116	0.00771663	2.81638
2549.61	11.78	0.406	-0.538	6.665	0.1	0.213	0.105	5.99949	-0.665509	0.00197432	0.00287116	0.00771663	2.81638
2550.59	11.78	0.406	-0.539	6.615	0.1	0.213	0.105	5.99949	-0.615509	0.00197432	0.00286479	0.0077039	2.81638
2551.58	11.78	0.406	-0.539	6.565	0.1	0.213	0.105	5.99949	-0.565509	0.00197432	0.00286479	0.0077039	2.81638
2552.56	11.78	0.406	-0.54	6.52	0.1	0.213	0.105	5.99949	-0.520509	0.00197432	0.00285842	0.00769117	2.81638
2553.55	11.78	0.406	-0.541	6.475	0.1	0.213	0.105	5.99949	-0.475509	0.00197432	0.00285206	0.00767844	2.81638
2554.53	11.76	0.406	-0.541	6.415	0.1	0.213	0.105	5.9893	-0.425695	0.00197432	0.00285206	0.00767844	2.81638
2555.62	11.8	0.406	-0.542	6.37	0.1	0.213	0.105	6.00968	-0.360323	0.00197432	0.00284569	0.0076657	2.81638
2556.61	11.78	0.407	-0.542	6.315	0.1	0.213	0.105	5.99949	-0.315509	0.00198405	0.00284569	0.00767543	2.81638
2557.59	11.78	0.407	-0.543	6.265	0.1	0.213	0.105	5.99949	-0.265509	0.00198405	0.00283932	0.0076627	2.81638
2558.58	11.76	0.406	-0.544	6.21	0.1	0.213	0.105	5.9893	-0.220695	0.00197432	0.00283296	0.00764024	2.81638
2559.56	11.78	0.406	-0.544	6.17	0.1	0.213	0.105	5.99949	-0.170509	0.00197432	0.00283296	0.00764024	2.81638
2560.55	11.78	0.407	-0.545	6.115	0.1	0.213	0.105	5.99949	-0.115509	0.00198405	0.00282659	0.00763723	2.81638
2561.53	11.78	0.407	-0.545	6.065	0.1	0.213	0.105	5.99949	-0.0655093	0.00198405	0.00282659	0.00763723	2.81638
2562.62	11.78	0.407	-0.546	6.015	0.1	0.213	0.105	5.99949	-0.0155093	0.00198405	0.00282023	0.0076245	2.81638
2563.61	11.76	0.407	-0.547	5.965	0.1	0.213	0.105	5.9893	0.0243048	0.00198405	0.00281386	0.00761177	2.81638
2564.59	11.76	0.407	-0.547	5.915	0.1	0.213	0.105	5.9893	0.0743048	0.00198405	0.00281386	0.00761177	2.81638
2565.58	11.76	0.407	-0.548	5.865	0.1	0.213	0.105	5.9893	0.124305	0.00198405	0.00280749	0.00759904	2.81638
2566.56	11.76	0.407	-0.549	5.815	0.1	0.213	0.105	5.9893	0.174305	0.00198405	0.00280113	0.0075863	2.81638
2567.54	11.76	0.407	-0.549	5.765	0.1	0.213	0.105	5.9893	0.224305	0.00198405	0.00280113	0.0075863	2.81638
2568.53	11.78	0.408	-0.55	5.715	0.1	0.213	0.105	5.99949	0.284491	0.00199378	0.00279476	0.0075833	2.81638
2569.62	11.76	0.408	-0.551	5.665	0.1	0.213	0.105	5.9893	0.324305	0.00199378	0.00278839	0.00757056	2.81638
2570.61	11.76	0.407	-0.552	5.615	0.1	0.213	0.105	5.9893	0.374305	0.00198405	0.00278203	0.00754811	2.81638
2571.59	11.78	0.408	-0.552	5.565	0.1	0.213	0.105	5.99949	0.434491	0.00199378	0.00278203	0.00755783	2.81638
2572.57	11.78	0.407	-0.553	5.515	0.1	0.213	0.105	5.99949	0.484491	0.00198405	0.00277566	0.00753537	2.81638
2573.56	11.78	0.408	-0.554	5.47	0.1	0.213	0.105	5.99949	0.529491	0.00199378	0.0027693	0.00753237	2.81638
2574.55	11.78	0.408	-0.555	5.415	0.1	0.213	0.105	5.99949	0.584491	0.00199378	0.00276293	0.00751964	2.81638
2575.53	11.8	0.408	-0.556	5.37	0.1	0.213	0.105	6.00968	0.639677	0.00199378	0.00275656	0.0075069	2.81638
2576.62	11.8	0.408	-0.556	5.32	0.1	0.213	0.105	6.00968	0.689677	0.00199378	0.00275656	0.0075069	2.81638
2577.61	11.8	0.41	-0.557	5.27	0.1	0.213	0.105	6.00968	0.739677	0.00201323	0.0027502	0.00751362	2.81638
2578.59	11.78	0.408	-0.558	5.215	0.1	0.213	0.105	5.99949	0.784491	0.00199378	0.00274383	0.00748144	2.81638
2579.58	11.78	0.41	-0.559	5.165	0.1	0.213	0.105	5.99949	0.834491	0.00201323	0.00273747	0.00748816	2.81638
2580.56	11.76	0.41	-0.56	5.115	0.1	0.213	0.105	5.9893	0.874305	0.00201323	0.0027311	0.00747542	2.81638
2581.55	11.78	0.41	-0.561	5.065	0.1	0.213	0.105	5.99949	0.934491	0.00201323	0.00272473	0.00746269	2.81638
2582.53	11.76	0.408	-0.562	5.015	0.1	0.213	0.105	5.9893	0.974305	0.00199378	0.00271837	0.00743051	2.81638
2583.62	11.78	0.41	-0.562	4.965	0.1	0.213	0.105	5.99949	1.03449	0.00201323	0.00271837	0.00744996	2.81638
2584.61	11.78	0.41	-0.563	4.91	0.1	0.213	0.105	5.99949	1.08949	0.00201323	0.002712	0.00743723	2.81638
2585.59	11.78	0.41	-0.564	4.865	0.1	0.213	0.105	5.99949	1.13449	0.00201323	0.00270563	0.0074245	2.81638
2586.58	11.76	0.41	-0.565	4.815	0.1	0.213	0.105	5.9893	1.1743	0.00201323	0.00269927	0.00741176	2.81638
2587.56	11.78	0.411	-0.566	4.765	0.1	0.213	0.105	5.99949	1.23449	0.00202295	0.0026929	0.00740876	2.81638
2588.55	11.78	0.411	-0.567	4.715	0.1	0.213	0.105	5.99949	1.28449	0.00202295	0.00268654	0.00739602	2.81638
2589.53	11.78	0.411	-0.568	4.67	0.1	0.213	0.105	5.99949	1.32949	0.00202295	0.00268017	0.00738329	2.81638
2590.62	11.78	0.411	-0.569	4.615	0.1	0.213	0.105	5.99949	1.38449	0.00202295	0.0026738	0.00737056	2.81638
2591.61	11.76	0.411	-0.57	4.565	0.1	0.213	0.105	5.9893	1.4243	0.00202295	0.00266744	0.00735783	2.81638
2592.59	11.76	0.411	-0.571	4.515	0.1	0.213	0.105	5.9893	1.4743	0.00202295	0.00266107	0.00734509	2.81638
2593.57	11.78	0.411	-0.572	4.465	0.1	0.213	0.105	5.99949	1.53449	0.00202295	0.0026547	0.00733236	2.81638
2594.56	11.78	0.413	-0.573	4.42	0.1	0.213	0.105	5.99949	1.57949	0.0020424	0.00264834	0.00733908	2.81638
2595.55	11.78	0.413	-0.574	4.365	0.1	0.213	0.105	5.99949	1.63449	0.0020424	0.00264197	0.00732635	2.81638
2596.53	11.78	0.413	-0.575	4.315	0.1	0.213	0.105	5.99949	1.68449	0.0020424	0.00263561	0.00731362	2.81638
2597.62	11.78	0.413	-0.576	4.265	0.1	0.213	0.105	5.99949	1.73449	0.0020424	0.00262924	0.00730088	2.81638
2598.61	11.78	0.413	-0.578	4.215	0.1	0.213	0.105	5.99949	1.78449	0.0020424	0.00261651	0.00727542	2.81638
2599.59	11.78	0.413	-0.579	4.17	0.1	0.213	0.105	5.99949	1.82949	0.0020424	0.00261014	0.00726269	2.81638
2600.58	11.78	0.413	-0.58	4.12	0.1	0.213	0.105	5.99949	1.87949	0.0020424	0.00260377	0.00724995	2.81638
2601.56	11.8	0.414	-0.581	4.075	0.1	0.213	0.105	6.00968	1.93468	0.00205213	0.00259741	0.00724695	2.81638
2602.55	11.78	0.414	-0.582	4.02	0.1	0.213	0.105	5.99949	1.97949	0.00205213	0.00259104	0.00723421	2.81638
2603.53	11.78	0.414	-0.583	3.975	0.1	0.213	0.105	5.99949	2.02449	0.00205213	0.00258468	0.00722148	2.81638
2604.62	11.78	0.414	-0.585	3.915	0.1	0.213	0.105	5.99949	2.08449	0.00205213	0.00257194	0.00719602	2.81638
2605.61	11.78	0.414	-0.586	3.865	0.1	0.213	0.105	5.99949	2.13449	0.00205213	0.00256558	0.00718329	2.81638
2606.59	11.78	0.416	-0.587	3.815	0.1	0.213	0.105	5.99949	2.18449	0.00207158	0.00255921	0.00719	2.81638
2607.57	11.78	0.416	-0.589	3.765	0.1	0.213	0.105	5.99949	2.23449	0.00207158	0.00254648	0.00716454	2.81638
2608.56	11.76	0.414	-0.59	3.715	0.1	0.213	0.105	5.9893	2.2743	0.00205213	0.00254011	0.00713236	2.81638
2609.55	11.78	0.416	-0.591	3.67	0.1	0.213	0.105	5.99949	2.32949	0.00207158	0.00253375	0.00713907	2.81638
2610.53	11.78	0.416	-0.593	3.615	0.1	0.213	0.105	5.99949	2.38449	0.00207158	0.00252101	0.00711361	2.81638
2611.62	11.78	0.416	-0.594	3.565	0.1	0.213	0.105	5.99949	2.43449	0.00207158	0.00251465	0.00710088	2.81638
2612.61	11.78	0.416	-0.596	3.515	0.1	0.213	0.105	5.99949	2.48449	0.00207158	0.00250192	0.00707541	2.81638
2613.59	11.78	0.417	-0.597	3.47	0.1	0.213	0.105	5.99949	2.52949	0.00208131	0.00249555	0.00707241	2.81638
2614.58	11.76	0.417	-0.598	3.415	0.1	0.213	0.105	5.9893	2.5743	0.00208131	0.00248918	0.00705967	2.81638
2615.56	11.78	0.417	-0.6	3.37	0.1	0.213	0.105	5.99949	2.62949	0.00208131	0.00247645	0.00703421	2.81638
2616.55	11.78	0.417	-0.602	3.32	0.1	0.213	0.105	5.99949	2.67949	0.00208131	0.00246372	0.00700874	2.81638
2617.53	11.78	0.417	-0.603	3.265	0.1	0.213	0.105	5.99949	2.73449	0.00208131	0.00245735	0.00699601	2.81638
2618.62	11.78	0.419	-0.605	3.215	0.1	0.213	0.105	5.99949	2.78449	0.00210076	0.00244462	0.00699	2.81638
2619.61	11.78	0.419	-0.607	3.165	0.1	0.213	0.105	5.99949	2.83449	0.00210076	0.00243189	0.00696453	2.81638
2620.59	11.76	0.419	-0.608	3.115	0.1	0.213	0.105	5.9893	2.8743	0.00210076	0.00242552	0.0069518	2.81638
2621.58	11.78	0.419	-0.61	3.07	0.1	0.213	0.105	5.99949	2.92949	0.00210076	0.00241279	0.00692634	2.81638
2622.56	11.78	0.42	-0.611	3.02	0.1	0.213	0.105	5.99949	2.97949	0.00211048	0.00240642	0.00692333	2.81638
2623.55	11.78	0.42	-0.613	2.97	0.1	0.213	0.105	5.99949	3.02949	0.00211048	0.00239369	0.00689787	2.81638
2624.53	11.76	0.42	-0.615	2.915	0.1	0.213	0.105	5.9893	3.0743	0.00211048	0.00238096	0.0068724	2.81638
2625.62	11.78	0.422	-0.617	2.865	0.1	0.213	0.105	5.99949	3.13449	0.00212994	0.00236823	0.00686639	2.81638
2626.61	11.78	0.422	-0.618	2.815	0.1	0.213	0.105	5.99949	3.18449	0.00212994	0.00236186	0.00685365	2.81638
2627.59	11.8	0.422	-0.62	2.765	0.1	0.213	0.105	6.00968	3.24468	0.00212994	0.00234913	0.00682819	2.81638
2628.58	11.78	0.422	-0.621	2.715	0.1	0.213	0.105	5.99949	3.28449	0.00212994	0.00234276	0.00681546	2.81638
2629.56	11.78	0.423	-0.623	2.665	0.1	0.213	0.105	5.99949	3.33449	0.00213966	0.00233003	0.00679972	2.81638
2630.55	11.78	0.423	-0.625	2.615	0.1	0.213	0.105	5.99949	3.38449	0.00213966	0.0023173	0.00677425	2.81638
2631.53	11.8	0.423	-0.627	2.57	0.1	0.213	0.11	6.00968	3.43968	0.00213966	0.00230456	0.00674879	2.9505
2632.62	11.78	0.425	-0.628	2.52	0.1	0.213	0.11	5.99949	3.47949	0.00215911	0.0022982	0.00675551	2.9505
2633.61	11.78	0.425	-0.63	2.475	0.1	0.213	0.11	5.99949	3.52449	0.00215911	0.00228546	0.00673004	2.9505
2634.59	11.76	0.425	-0.632	2.43	0.1	0.213	0.11	5.9893	3.5593	0.00215911	0.00227273	0.00670458	2.9505
2635.58	11.78	0.425	-0.635	2.375	0.1	0.213	0.11	5.99949	3.62449	0.00215911	0.00225363	0.00666638	2.9505
2636.56	11.78	0.425	-0.638	2.325	0.1	0.213	0.11	5.99949	3.67449	0.00215911	0.00223454	0.00662818	2.9505
2637.55	11.78	0.426	-0.641	2.275	0.1	0.213	0.11	5.99949	3.72449	0.00216884	0.00221544	0.00659971	2.9505
2638.53	11.76	0.428	-0.645	2.22	0.1	0.213	0.11	5.9893	3.7693	0.00218829	0.00218997	0.00656823	2.9505
2639.62	11.76	0.428	-0.649	2.165	0.1	0.213	0.11	5.9893	3.8243	0.00218829	0.00216451	0.0065173	2.9505
2640.61	11.78	0.429	-0.652	2.18	0.1	0.213	0.11	5.99949	3.81949	0.00219802	0.00214541	0.00648883	2.9505
2641.59	11.78	0.429	-0.652	2.2	0.1	0.213	0.11	5.99949	3.79949	0.00219802	0.00214541	0.00648883	2.9505
2642.57	11.78	0.429	-0.652	2.215	0.1	0.213	0.11	5.99949	3.78449	0.00219802	0.00214541	0.00648883	2.9505
2643.56	11.78	0.429	-0.651	2.24	0.1	0.213	0.11	5.99949	3.75949	0.00219802	0.00215177	0.00650157	2.9505
2644.55	11.78	0.429	-0.651	2.23	0.1	0.213	0.11	5.99949	3.76949	0.00219802	0.00215177	0.00650157	2.9505
2645.53	11.78	0.429	-0.652	2.205	0.1	0.213	0.11	5.99949	3.79449	0.00219802	0.00214541	0.00648883	2.9505
2646.62	11.78	0.429	-0.652	2.17	0.1	0.213	0.11	5.99949	3.82949	0.00219802	0.00214541	0.00648883	2.9505
2647.61	11.8	0.429	-0.653	2.145	0.1	0.213	0.11	6.00968	3.86468	0.00219802	0.00213904	0.0064761	2.9505
2648.59	11.78	0.429	-0.654	2.125	0.1	0.213	0.11	5.99949	3.87449	0.00219802	0.00213268	0.00646337	2.9505
2649.58	11.78	0.429	-0.655	2.11	0.1	0.213	0.11	5.99949	3.88949	0.00219802	0.00212631	0.00645064	2.9505
2650.56	11.78	0.43	-0.656	2.095	0.1	0.213	0.11	5.99949	3.90449	0.00220774	0.00211994	0.00644763	2.9505
2651.55	11.78	0.429	-0.657	2.09	0.1	0.213	0.11	5.99949	3.90949	0.00219802	0.00211358	0.00642517	2.9505
2652.53	11.78	0.43	-0.657	2.08	0.1	0.213	0.11	5.99949	3.91949	0.00220774	0.00211358	0.0064349	2.9505
2653.62	11.78	0.43	-0.658	2.075	0.1	0.213	0.11	5.99949	3.92449	0.00220774	0.00210721	0.00642216	2.9505
2654.61	11.78	0.43	-0.659	2.065	0.1	0.213	0.11	5.99949	3.93449	0.00220774	0.00210085	0.00640943	2.9505
2655.59	11.78	0.43	-0.659	2.06	0.1	0.213	0.11	5.99949	3.93949	0.00220774	0.00210085	0.00640943	2.9505
2656.58	11.78	0.43	-0.66	2.055	0.1	0.213	0.11	5.99949	3.94449	0.00220774	0.00209448	0.0063967	2.9505
2657.56	11.78	0.43	-0.66	2.05	0.1	0.213	0.11	5.99949	3.94949	0.00220774	0.00209448	0.0063967	2.9505
2658.55	11.78	0.43	-0.661	2.04	0.1	0.213	0.11	5.99949	3.95949	0.00220774	0.00208811	0.00638397	2.9505
2659.53	11.78	0.43	-0.661	2.035	0.1	0.213	0.11	5.99949	3.96449	0.00220774	0.00208811	0.00638397	2.9505
2660.62	11.78	0.432	-0.662	2.03	0.1	0.213	0.11	5.99949	3.96949	0.00222719	0.00208175	0.00639069	2.9505
2661.61	11.8	0.432	-0.662	2.025	0.1	0.213	0.11	6.00968	3.98468	0.00222719	0.00208175	0.00639069	2.9505
2662.59	11.8	0.432	-0.663	2.02	0.1	0.213	0.11	6.00968	3.98968	0.00222719	0.00207538	0.00637795	2.9505
2663.58	11.8	0.432	-0.663	2.02	0.1	0.213	0.11	6.00968	3.98968	0.00222719	0.00207538	0.00637795	2.9505
2664.56	11.78	0.432	-0.664	2.015	0.1	0.213	0.11	5.99949	3.98449	0.00222719	0.00206901	0.00636522	2.9505
2665.55	11.78	0.432	-0.664	2.01	0.1	0.213	0.11	5.99949	3.98949	0.00222719	0.00206901	0.00636522	2.9505
2666.53	11.76	0.432	-0.664	2.01	0.1	0.213	0.11	5.9893	3.9793	0.00222719	0.00206901	0.00636522	2.9505
2667.62	11.78	0.432	-0.665	2.005	0.1	0.213	0.11	5.99949	3.99449	0.00222719	0.00206265	0.00635249	2.9505
2668.61	11.78	0.432	-0.665	2	0.1	0.213	0.11	5.99949	3.99949	0.00222719	0.00206265	0.00635249	2.9505
2669.59	11.78	0.432	-0.665	2	0.1	0.213	0.11	5.99949	3.99949	0.00222719	0.00206265	0.00635249	2.9505
2670.58	11.76	0.432	-0.665	1.995	0.1	0.213	0.11	5.9893	3.9943	0.00222719	0.00206265	0.00635249	2.9505
2671.56	11.78	0.432	-0.666	1.995	0.1	0.213	0.11	5.99949	4.00449	0.00222719	0.00205628	0.00633976	2.9505
2672.55	11.78	0.432	-0.666	1.995	0.1	0.213	0.11	5.99949	4.00449	0.00222719	0.00205628	0.00633976	2.9505
2673.53	11.78	0.432	-0.666	2	0.1	0.213	0.11	5.99949	3.99949	0.00222719	0.00205628	0.00633976	2.9505
2674.62	11.78	0.433	-0.666	2	0.1	0.213	0.11	5.99949	3.99949	0.00223692	0.00205628	0.00634948	2.9505
2675.61	11.78	0.432	-0.666	2	0.1	0.213	0.11	5.99949	3.99949	0.00222719	0.00205628	0.00633976	2.9505
2676.59	11.8	0.432	-0.666	2	0.1	0.213	0.11	6.00968	4.00968	0.00222719	0.00205628	0.00633976	2.9505
2677.57	11.8	0.433	-0.666	2	0.1	0.213	0.11	6.00968	4.00968	0.00223692	0.00205628	0.00634948	2.9505
2678.56	11.8	0.433	-0.666	2	0.1	0.213	0.11	6.00968	4.00968	0.00223692	0.00205628	0.00634948	2.9505
2679.55	11.8	0.433	-0.666	2	0.1	0.213	0.11	6.00968	4.00968	0.00223692	0.00205628	0.00634948	2.9505
2680.53	11.78	0.432	-0.667	2	0.1	0.213	0.11	5.99949	3.99949	0.00222719	0.00204992	0.00632702	2.9505
2681.62	11.78	0.432	-0.667	2	0.1	0.213	0.11	5.99949	3.99949	0.00222719	0.00204992	0.00632702	2.9505
2682.61	11.78	0.432	-0.667	2	0.1	0.213	0.11	5.99949	3.99949	0.00222719	0.00204992	0.00632702	2.9505
2683.59	11.76	0.433	-0.667	2	0.1	0.213	0.11	5.9893	3.9893	0.00223692	0.00204992	0.00633675	2.9505
2684.58	11.76	0.433	-0.667	2	0.1	0.213	0.11	5.9893	3.9893	0.00223692	0.00204992	0.00633675	2.9505
2685.56	11.76	0.433	-0.667	2	0.1	0.213	0.11	5.9893	3.9893	0.00223692	0.00204992	0.00633675	2.9505
2686.55	11.78	0.433	-0.667	2	0.1	0.213	0.11	5.99949	3.99949	0.00223692	0.00204992	0.00633675	2.9505
2687.53	11.78	0.432	-0.667	2	0.1	0.213	0.11	5.99949	3.99949	0.00222719	0.00204992	0.00632702	2.9505
2688.62	11.78	0.433	-0.667	2	0.1	0.213	0.11	5.99949	3.99949	0.00223692	0.00204992	0.00633675	2.9505
2689.61	11.78	0.432	-0.667	2	0.1	0.213	0.11	5.99949	3.99949	0.00222719	0.00204992	0.00632702	2.9505
2690.59	11.78	0.432	-0.667	2	0.1	0.213	0.11	5.99949	3.99949	0.00222719	0.00204992	0.00632702	2.9505
2691.58	11.78	0.432	-0.667	2	0.1	0.213	0.11	5.99949	3.99949	0.00222719	0.00204992	0.00632702	2.9505
2692.56	11.78	0.432	-0.667	2	0.1	0.213	0.11	5.99949	3.99949	0.00222719	0.00204992	0.00632702	2.9505
2693.54	11.78	0.433	-0.667	2	0.1	0.213	0.11	5.99949	3.99949	0.00223692	0.00204992	0.00633675	2.9505
2694.53	11.78	0.432	-0.667	2	0.1	0.213	0.11	5.99949	3.99949	0.00222719	0.00204992	0.00632702	2.9505
2695.62	11.78	0.432	-0.667	2	0.1	0.213	0.11	5.99949	3.99949	0.00222719	0.00204992	0.00632702	2.9505
2696.61	11.78	0.433	-0.667	2	0.1	0.213	0.11	5.99949	3.99949	0.00223692	0.00204992	0.00633675	2.9505
2697.59	11.78	0.433	-0.667	2	0.1	0.213	0.11	5.99949	3.99949	0.00223692	0.00204992	0.00633675	2.9505
2698.58	11.78	0.433	-0.667	2	0.1	0.213	0.11	5.99949	3.99949	0.00223692	0.00204992	0.00633675	2.9505
2699.56	11.78	0.433	-0.667	2	0.1	0.213	0.11	5.99949	3.99949	0.00223692	0.00204992	0.00633675	2.9505
2700.55	11.78	0.433	-0.667	1.995	0.1	0.213	0.11	5.99949	4.00449	0.00223692	0.00204992	0.00633675	2.9505
2701.53	11.78	0.433	-0.667	1.995	0.1	0.213	0.11	5.99949	4.00449	0.00223692	0.00204992	0.00633675	2.9505
2702.62	11.78	0.432	-0.667	2	0.1	0.213	0.11	5.99949	3.99949	0.00222719	0.00204992	0.00632702	2.9505
2703.61	11.78	0.433	-0.667	2	0.1	0.213	0.11	5.99949	3.99949	0.00223692	0.00204992	0.00633675	2.9505
2704.59	11.78	0.433	-0.667	2	0.1	0.213	0.11	5.99949	3.99949	0.00223692	0.00204992	0.00633675	2.9505
2705.58	11.78	0.433	-0.667	2	0.1	0.213	0.11	5.99949	3.99949	0.00223692	0.00204992	0.00633675	2.9505
2706.56	11.78	0.432	-0.667	2	0.1	0.213	0.11	5.99949	3.99949	0.00222719	0.00204992	0.00632702	2.9505
2707.55	11.78	0.433	-0.667	2	0.1	0.213	0.11	5.99949	3.99949	0.00223692	0.00204992	0.00633675	2.9505
2708.53	11.78	0.433	-0.667	2	0.1	0.213	0.11	5.99949	3.99949	0.00223692	0.00204992	0.00633675	2.9505
2709.62	11.78	0.433	-0.667	2	0.1	0.213	0.11	5.99949	3.99949	0.00223692	0.00204992	0.00633675	2.9505
2710.61	11.78	0.432	-0.667	2	0.1	0.213	0.11	5.99949	3.99949	0.00222719	0.00204992	0.00632702	2.9505
2711.59	11.78	0.433	-0.667	2	0.1	0.213	0.11	5.99949	3.99949	0.00223692	0.00204992	0.00633675	2.9505
2712.57	11.78	0.433	-0.667	2	0.1	0.213	0.11	5.99949	3.99949	0.00223692	0.00204992	0.00633675	2.9505
2713.56	11.78	0.433	-0.667	2	0.1	0.213	0.11	5.99949	3.99949	0.00223692	0.00204992	0.00633675	2.9505
2714.55	11.78	0.433	-0.667	2	0.1	0.213	0.11	5.99949	3.99949	0.00223692	0.00204992	0.00633675	2.9505
2715.53	11.78	0.433	-0.667	2	0.1	0.213	0.11	5.99949	3.99949	0.00223692	0.00204992	0.00633675	2.9505
2716.62	11.78	0.433	-0.667	2	0.1	0.213	0.11	5.99949	3.99949	0.00223692	0.00204992	0.00633675	2.9505
2717.61	11.78	0.433	-0.667	2	0.1	0.213	0.11	5.99949	3.99949	0.00223692	0.00204992	0.00633675	2.9505
2718.59	11.78	0.433	-0.667	2	0.1	0.213	0.11	5.99949	3.99949	0.00223692	0.00204992	0.00633675	2.9505
2719.58	11.78	0.433	-0.667	2	0.1	0.213	0.11	5.99949	3.99949	0.00223692	0.00204992	0.00633675	2.9505
2720.56	11.78	0.433	-0.667	2	0.1	0.213	0.11	5.99949	3.99949	0.00223692	0.00204992	0.00633675	2.9505
2721.55	11.78	0.433	-0.667	2	0.1	0.213	0.11	5.99949	3.99949	0.00223692	0.00204992	0.00633675	2.9505
2722.53	11.78	0.433	-0.667	2	0.1	0.213	0.11	5.99949	3.99949	0.00223692	0.00204992	0.00633675	2.9505
2723.62	11.78	0.433	-0.667	2	0.1	0.213	0.11	5.99949	3.99949	0.00223692	0.00204992	0.00633675	2.9505
2724.61	11.78	0.433	-0.667	2	0.1	0.213	0.11	5.99949	3.99949	0.00223692	0.00204992	0.00633675	2.9505
2725.59	11.78	0.433	-0.667	2	0.1	0.213	0.11	5.99949	3.99949	0.00223692	0.00204992	0.00633675	2.9505
2726.58	11.78	0.433	-0.667	2	0.1	0.213	0.11	5.99949	3.99949	0.00223692	0.00204992	0.00633675	2.9505
2727.56	11.78	0.433	-0.667	2	0.1	0.213	0.11	5.99949	3.99949	0.00223692	0.00204992	0.00633675	2.9505
2728.55	11.78	0.433	-0.667	2	0.1	0.213	0.11	5.99949	3.99949	0.00223692	0.00204992	0.00633675	2.9505
2729.53	11.78	0.433	-0.667	2	0.1	0.213	0.11	5.99949	3.99949	0.00223692	0.00204992	0.00633675	2.9505
2730.62	11.78	0.433	-0.667	2	0.1	0.213	0.11	5.99949	3.99949	0.00223692	0.00204992	0.00633675	2.9505
2731.61	11.78	0.433	-0.667	2	0.1	0.213	0.11	5.99949	3.99949	0.00223692	0.00204992	0.00633675	2.9505
2732.59	11.78	0.433	-0.667	2	0.1	0.213	0.11	5.99949	3.99949	0.00223692	0.00204992	0.00633675	2.9505
2733.58	11.78	0.433	-0.667	2	0.1	0.213	0.11	5.99949	3.99949	0.00223692	0.00204992	0.00633675	2.9505
2734.56	11.78	0.433	-0.667	2	0.1	0.213	0.11	5.99949	3.99949	0.00223692	0.00204992	0.00633675	2.9505
2735.55	11.78	0.433	-0.667	2	0.1	0.213	0.11	5.99949	3.99949	0.00223692	0.00204992	0.00633675	2.9505
2736.53	11.78	0.433	-0.667	2	0.1	0.213	0.11	5.99949	3.99949	0.00223692	0.00204992	0.00633675	2.9505
2737.62	11.8	0.433	-0.667	2	0.1	0.213	0.11	6.00968	4.00968	0.00223692	0.00204992	0.00633675	2.9505
2738.61	11.78	0.433	-0.667	2	0.1	0.213	0.11	5.99949	3.99949	0.00223692	0.00204992	0.00633675	2.9505
2739.59	11.78	0.433	-0.667	2	0.1	0.213	0.11	5.99949	3.99949	0.00223692	0.00204992	0.00633675	2.9505
2740.58	11.78	0.433	-0.667	2	0.1	0.213	0.11	5.99949	3.99949	0.00223692	0.00204992	0.00633675	2.9505
2741.56	11.78	0.433	-0.667	2	0.1	0.213	0.11	5.99949	3.99949	0.00223692	0.00204992	0.00633675	2.9505
2742.55	11.78	0.433	-0.667	2	0.1	0.213	0.11	5.99949	3.99949	0.00223692	0.00204992	0.00633675	2.9505
2743.53	11.78	0.433	-0.667	2	0.1	0.213	0.11	5.99949	3.99949	0.00223692	0.00204992	0.00633675	2.9505
2744.62	11.78	0.433	-0.667	2	0.1	0.213	0.11	5.99949	3.99949	0.00223692	0.00204992	0.00633675	2.9505
2745.61	11.78	0.433	-0.667	2	0.1	0.213	0.11	5.99949	3.99949	0.00223692	0.00204992	0.00633675	2.9505
2746.59	11.78	0.433	-0.667	2	0.1	0.213	0.11	5.99949	3.99949	0.00223692	0.00204992	0.00633675	2.9505
2747.57	11.78	0.433	-0.667	2	0.1	0.213	0.11	5.99949	3.99949	0.00223692	0.00204992	0.00633675	2.9505
2748.56	11.78	0.433	-0.667	2	0.1	0.213	0.11	5.99949	3.99949	0.00223692	0.00204992	0.00633675	2.9505
2749.55	11.78	0.433	-0.667	2	0.1	0.213	0.11	5.99949	3.99949	0.00223692	0.00204992	0.00633675	2.9505
2750.53	11.78	0.433	-0.667	2	0.1	0.213	0.11	5.99949	3.99949	0.00223692	0.00204992	0.00633675	2.9505
2751.62	11.78	0.433	-0.667	2	0.1	0.213	0.11	5.99949	3.99949	0.00223692	0.00204992	0.00633675	2.9505
2752.61	11.78	0.433	-0.667	2	0.1	0.213	0.11	5.99949	3.99949	0.00223692	0.00204992	0.00633675	2.9505
2753.59	11.78	0.433	-0.667	2	0.1	0.213	0.11	5.99949	3.99949	0.00223692	0.00204992	0.00633675	2.9505
2754.58	11.78	0.433	-0.667	2	0.1	0.213	0.11	5.99949	3.99949	0.00223692	0.00204992	0.00633675	2.9505
2755.56	11.78	0.433	-0.667	2	0.1	0.213	0.11	5.99949	3.99949	0.00223692	0.00204992	0.00633675	2.9505
2756.55	11.78	0.433	-0.667	2	0.1	0.213	0.11	5.99949	3.99949	0.00223692	0.00204992	0.00633675	2.9505
2757.53	11.78	0.433	-0.667	2	0.1	0.213	0.11	5.99949	3.99949	0.00223692	0.00204992	0.00633675	2.9505
2758.62	11.78	0.433	-0.667	2	0.1	0.213	0.11	5.99949	3.99949	0.00223692	0.00204992	0.00633675	2.9505
2759.61	11.78	0.433	-0.667	2	0.1	0.213	0.11	5.99949	3.99949	0.00223692	0.00204992	0.00633675	2.9505
2760.59	11.78	0.433	-0.667	2	0.1	0.213	0.11	5.99949	3.99949	0.00223692	0.00204992	0.00633675	2.9505
2761.58	11.78	0.433	-0.667	2	0.1	0.213	0.11	5.99949	3.99949	0.00223692	0.00204992	0.00633675	2.9505
2762.56	11.78	0.433	-0.667	2	0.1	0.213	0.11	5.99949	3.99949	0.00223692	0.00204992	0.00633675	2.9505
2763.55	11.78	0.433	-0.667	2	0.1	0.213	0.11	5.99949	3.99949	0.00223692	0.00204992	0.00633675	2.9505
2764.53	11.78	0.433	-0.667	2	0.1	0.213	0.11	5.99949	3.99949	0.00223692	0.00204992	0.00633675	2.9505
2765.62	11.78	0.433	-0.667	2	0.1	0.213	0.11	5.99949	3.99949	0.00223692	0.00204992	0.00633675	2.9505
2766.61	11.78	0.433	-0.667	2	0.1	0.213	0.11	5.99949	3.99949	0.00223692	0.00204992	0.00633675	2.9505
2767.59	11.78	0.433	-0.667	2	0.1	0.213	0.11	5.99949	3.99949	0.00223692	0.00204992	0.00633675	2.9505
2768.58	11.78	0.433	-0.667	2	0.1	0.213	0.11	5.99949	3.99949	0.00223692	0.00204992	0.00633675	2.9505
2769.56	11.78	0.433	-0.667	2	0.1	0.213	0.11	5.99949	3.99949	0.00223692	0.00204992	0.00633675	2.9505
2770.55	11.78	0.433	-0.667	2	0.1	0.213	0.11	5.99949	3.99949	0.00223692	0.00204992	0.00633675	2.9505
2771.53	11.78	0.433	-0.667	2	0.1	0.213	0.11	5.99949	3.99949	0.00223692	0.00204992	0.00633675	2.9505
2772.62	11.78	0.433	-0.667	2	0.1	0.213	0.11	5.99949	3.99949	0.00223692	0.00204992	0.00633675	2.9505
2773.61	11.78	0.433	-0.667	2	0.1	0.213	0.11	5.99949	3.99949	0.00223692	0.00204992	0.00633675	2.9505
2774.59	11.78	0.433	-0.667	2	0.1	0.213	0.11	5.99949	3.99949	0.00223692	0.00204992	0.00633675	2.9505
2775.58	11.78	0.433	-0.667	2	0.1	0.213	0.11	5.99949	3.99949	0.00223692	0.00204992	0.00633675	2.9505
2776.56	11.78	0.433	-0.667	2	0.1	0.213	0.11	5.99949	3.99949	0.00223692	0.00204992	0.00633675	2.9505
2777.55	11.78	0.433	-0.667	2	0.1	0.213	0.11	5.99949	3.99949	0.00223692	0.00204992	0.00633675	2.9505
2778.53	11.78	0.433	-0.667	2	0.1	0.213	0.11	5.99949	3.99949	0.00223692	0.00204992	0.00633675	2.9505
2779.62	11.78	0.433	-0.667	2	0.1	0.213	0.11	5.99949	3.99949	0.00223692	0.00204992	0.00633675	2.9505
2780.61	11.78	0.433	-0.667	2	0.1	0.213	0.11	5.99949	3.99949	0.00223692	0.00204992	0.00633675	2.9505
2781.59	11.78	0.433	-0.667	2	0.1	0.213	0.11	5.99949	3.99949	0.00223692	0.00204992	0.00633675	2.9505
2782.57	11.78	0.433	-0.667	2	0.1	0.213	0.11	5.99949	3.99949	0.00223692	0.00204992	0.00633675	2.9505
2783.56	11.78	0.433	-0.667	2	0.1	0.213	0.11	5.99949	3.99949	0.00223692	0.00204992	0.00633675	2.9505
2784.55	11.78	0.433	-0.667	2	0.1	0.213	0.11	5.99949	3.99949	0.00223692	0.00204992	0.00633675	2.9505
2785.53	11.78	0.433	-0.667	2	0.1	0.213	0.11	5.99949	3.99949	0.00223692	0.00204992	0.00633675	2.9505
2786.62	11.78	0.433	-0.667	2	0.1	0.213	0.11	5.99949	3.99949	0.00223692	0.00204992	0.00633675	2.9505
2787.61	11.78	0.433	-0.667	2	0.1	0.213	0.11	5.99949	3.99949	0.00223692	0.00204992	0.00633675	2.9505
2788.59	11.78	0.433	-0.667	2	0.1	0.213	0.11	5.99949	3.99949	0.00223692	0.00204992	0.00633675	2.9505
2789.58	11.78	0.433	-0.667	2	0.1	0.213	0.11	5.99949	3.99949	0.00223692	0.00204992	0.00633675	2.9505
2790.56	11.78	0.435	-0.667	2	0.1	0.213	0.11	5.99949	3.99949	0.00225637	0.00204992	0.0063562	2.9505
2791.55	11.78	0.435	-0.667	2	0.1	0.213	0.11	5.99949	3.99949	0.00225637	0.00204992	0.0063562	2.9505
2792.53	11.82	0.433	-0.667	2	0.1	0.213	0.11	6.01986	4.01986	0.00223692	0.00204992	0.00633675	2.9505
2793.62	11.88	0.435	-0.667	2	0.1	0.213	0.11	6.05042	4.05042	0.00225637	0.00204992	0.0063562	2.9505
2794.61	11.92	0.436	-0.667	2	0.1	0.213	0.11	6.07079	4.07079	0.0022661	0.00204992	0.00636593	2.9505
2795.59	11.96	0.435	-0.667	2	0.1	0.213	0.11	6.09116	4.09116	0.00225637	0.00204992	0.0063562	2.9505
2796.58	12.02	0.436	-0.667	2	0.1	0.213	0.11	6.12172	4.12172	0.0022661	0.00204992	0.00636593	2.9505
2797.56	12.06	0.436	-0.667	2	0.1	0.213	0.11	6.14209	4.14209	0.0022661	0.00204992	0.00636593	2.9505
2798.55	12.12	0.438	-0.667	2	0.1	0.213	0.11	6.17265	4.17265	0.00228555	0.00204992	0.00638538	2.9505
2799.53	12.16	0.438	-0.668	2	0.1	0.213	0.11	6.19302	4.19302	0.00228555	0.00204355	0.00637265	2.9505
2800.62	12.22	0.439	-0.668	2	0.1	0.213	0.11	6.22358	4.22358	0.00229527	0.00204355	0.00638237	2.9505
2801.61	12.26	0.439	-0.668	2	0.1	0.213	0.11	6.24395	4.24395	0.00229527	0.00204355	0.00638237	2.9505
2802.59	12.3	0.441	-0.668	2	0.1	0.213	0.11	6.26432	4.26432	0.00231472	0.00204355	0.00640182	2.9505
2803.58	12.34	0.441	-0.668	2	0.1	0.213	0.11	6.2847	4.2847	0.00231472	0.00204355	0.00640182	2.9505
2804.56	12.4	0.442	-0.668	2	0.1	0.213	0.11	6.31525	4.31525	0.00232445	0.00204355	0.00641155	2.9505
2805.55	12.44	0.442	-0.669	2	0.1	0.213	0.11	6.33563	4.33563	0.00232445	0.00203718	0.00639882	2.9505
2806.53	12.5	0.442	-0.669	2	0.1	0.213	0.11	6.36618	4.36618	0.00232445	0.00203718	0.00639882	2.9505
2807.62	12.56	0.444	-0.669	2	0.1	0.213	0.11	6.39674	4.39674	0.0023439	0.00203718	0.00641827	2.9505
2808.61	12.6	0.445	-0.67	2	0.1	0.213	0.11	6.41711	4.41711	0.00235363	0.00203082	0.00641526	2.9505
2809.59	12.66	0.445	-0.67	2	0.1	0.213	0.11	6.44767	4.44767	0.00235363	0.00203082	0.00641526	2.9505
2810.58	12.7	0.447	-0.67	2	0.1	0.213	0.11	6.46804	4.46804	0.00237308	0.00203082	0.00643471	2.9505
2811.56	12.76	0.448	-0.671	2	0.1	0.213	0.11	6.4986	4.4986	0.0023828	0.00202445	0.00643171	2.9505
2812.55	12.78	0.448	-0.671	2	0.1	0.213	0.11	6.50879	4.50879	0.0023828	0.00202445	0.00643171	2.9505
2813.53	12.86	0.45	-0.672	2	0.1	0.213	0.11	6.54953	4.54953	0.00240226	0.00201808	0.00643843	2.9505
2814.62	12.88	0.45	-0.672	2	0.1	0.213	0.11	6.55971	4.55971	0.00240226	0.00201808	0.00643843	2.9505
2815.61	12.94	0.451	-0.673	2	0.1	0.213	0.11	6.59027	4.59027	0.00241198	0.00201172	0.00643542	2.9505
2816.59	13	0.453	-0.673	2	0.1	0.213	0.11	6.62083	4.62083	0.00243143	0.00201172	0.00645487	2.9505
2817.57	13.06	0.453	-0.673	2	0.1	0.213	0.11	6.65139	4.65139	0.00243143	0.00201172	0.00645487	2.9505
2818.56	13.1	0.454	-0.674	2	0.1	0.213	0.105	6.67176	4.67176	0.00244116	0.00200535	0.00645186	2.81638
2819.55	13.16	0.455	-0.674	2	0.1	0.213	0.105	6.70232	4.70232	0.00245089	0.00200535	0.00646159	2.81638
2820.53	13.2	0.457	-0.675	2	0.1	0.213	0.11	6.72269	4.72269	0.00247034	0.00199899	0.00646831	2.9505
2821.62	13.26	0.457	-0.675	2	0.1	0.213	0.11	6.75325	4.75325	0.00247034	0.00199899	0.00646831	2.9505
2822.61	13.32	0.458	-0.676	2	0.1	0.213	0.105	6.7838	4.7838	0.00248006	0.00199262	0.0064653	2.81638
2823.59	13.38	0.46	-0.677	2	0.1	0.213	0.105	6.81436	4.81436	0.00249951	0.00198625	0.00647202	2.81638
2824.58	13.42	0.461	-0.677	2	0.1	0.213	0.105	6.83473	4.83473	0.00250924	0.00198625	0.00648175	2.81638
2825.56	13.46	0.461	-0.678	2	0.1	0.213	0.105	6.85511	4.85511	0.00250924	0.00197989	0.00646901	2.81638
2826.54	13.5	0.463	-0.678	2	0.1	0.213	0.105	6.87548	4.87548	0.00252869	0.00197989	0.00648847	2.81638
2827.53	13.56	0.464	-0.679	2	0.1	0.213	0.105	6.90604	4.90604	0.00253842	0.00197352	0.00648546	2.81638
2828.62	13.62	0.464	-0.679	2	0.1	0.213	0.105	6.93659	4.93659	0.00253842	0.00197352	0.00648546	2.81638
2829.61	13.66	0.466	-0.68	2	0.1	0.213	0.105	6.95696	4.95696	0.00255787	0.00196716	0.00649218	2.81638
2830.59	13.7	0.467	-0.681	2	0.1	0.213	0.105	6.97734	4.97734	0.00256759	0.00196079	0.00648917	2.81638
2831.58	13.76	0.469	-0.681	2	0.1	0.213	0.105	7.00789	5.00789	0.00258705	0.00196079	0.00650862	2.81638
2832.56	13.8	0.469	-0.682	2	0.1	0.213	0.105	7.02827	5.02827	0.00258705	0.00195442	0.00649589	2.81638
2833.55	13.84	0.47	-0.683	2	0.1	0.213	0.105	7.04864	5.04864	0.00259677	0.00194806	0.00649288	2.81638
2834.53	13.9	0.472	-0.683	2	0.1	0.213	0.105	7.0792	5.0792	0.00261622	0.00194806	0.00651234	2.81638
2835.62	13.96	0.472	-0.684	2	0.1	0.213	0.105	7.10975	5.10975	0.00261622	0.00194169	0.0064996	2.81638
2836.61	14	0.473	-0.684	2	0.1	0.213	0.105	7.13012	5.13012	0.00262595	0.00194169	0.00650933	2.81638
2837.59	14.06	0.475	-0.685	2	0.1	0.213	0.105	7.16068	5.16068	0.0026454	0.00193532	0.00651605	2.81638
2838.58	14.12	0.476	-0.686	2	0.1	0.213	0.105	7.19124	5.19124	0.00265513	0.00192896	0.00651304	2.81638
2839.56	14.2	0.477	-0.686	2	0.1	0.213	0.105	7.23198	5.23198	0.00266485	0.00192896	0.00652277	2.81638
2840.55	14.24	0.479	-0.687	2	0.1	0.213	0.105	7.25236	5.25236	0.0026843	0.00192259	0.00652949	2.81638
2841.53	14.28	0.48	-0.687	2	0.1	0.213	0.105	7.27273	5.27273	0.00269403	0.00192259	0.00653921	2.81638
2842.62	14.34	0.48	-0.688	2	0.1	0.213	0.105	7.30328	5.30328	0.00269403	0.00191623	0.00652648	2.81638
2843.61	14.38	0.482	-0.689	2	0.1	0.213	0.105	7.32366	5.32366	0.00271348	0.00190986	0.0065332	2.81638
2844.59	14.44	0.483	-0.69	2	0.1	0.213	0.105	7.35421	5.35421	0.00272321	0.00190349	0.00653019	2.81638
2845.58	14.48	0.485	-0.69	2	0.1	0.213	0.105	7.37459	5.37459	0.00274266	0.00190349	0.00654964	2.81638
2846.56	14.52	0.485	-0.691	2	0.1	0.213	0.105	7.39496	5.39496	0.00274266	0.00189713	0.00653691	2.81638
2847.55	14.56	0.486	-0.692	2	0.1	0.213	0.105	7.41533	5.41533	0.00275238	0.00189076	0.0065339	2.81638
2848.53	14.62	0.488	-0.693	2	0.1	0.213	0.105	7.44589	5.44589	0.00277183	0.00188439	0.00654062	2.81638
2849.62	14.66	0.489	-0.693	2	0.1	0.213	0.105	7.46626	5.46626	0.00278156	0.00188439	0.00655035	2.81638
2850.61	14.74	0.491	-0.694	2	0.1	0.213	0.105	7.507	5.507	0.00280101	0.00187803	0.00655707	2.81638
2851.59	14.78	0.492	-0.695	2	0.1	0.213	0.105	7.52737	5.52737	0.00281074	0.00187166	0.00655406	2.81638
2852.57	14.82	0.492	-0.696	2	0.1	0.213	0.105	7.54775	5.54775	0.00281074	0.0018653	0.00654133	2.81638
2853.56	14.88	0.495	-0.696	2	0.1	0.213	0.105	7.5783	5.5783	0.00283991	0.0018653	0.00657051	2.81638
2854.55	14.9	0.495	-0.697	2	0.1	0.213	0.105	7.58849	5.58849	0.00283991	0.00185893	0.00655777	2.81638
2855.53	14.96	0.497	-0.698	2	0.1	0.213	0.105	7.61905	5.61905	0.00285937	0.00185256	0.00656449	2.81638
2856.62	15.02	0.498	-0.699	2	0.1	0.213	0.105	7.64961	5.64961	0.00286909	0.0018462	0.00656149	2.81638
2857.61	15.08	0.501	-0.699	2	0.1	0.213	0.105	7.68016	5.68016	0.00289827	0.0018462	0.00659066	2.81638
2858.59	15.12	0.502	-0.7	2	0.1	0.213	0.105	7.70053	5.70053	0.00290799	0.00183983	0.00658766	2.81638
2859.58	15.16	0.504	-0.701	2	0.1	0.213	0.105	7.72091	5.72091	0.00292745	0.00183346	0.00659438	2.81638
2860.56	15.2	0.505	-0.702	2	0.1	0.213	0.1	7.74128	5.74128	0.00293717	0.0018271	0.00659137	2.68227
2861.54	15.24	0.507	-0.702	2	0.1	0.213	0.1	7.76165	5.76165	0.00295662	0.0018271	0.00661082	2.68227
2862.53	15.3	0.508	-0.703	2	0.1	0.213	0.1	7.79221	5.79221	0.00296635	0.00182073	0.00660781	2.68227
2863.62	15.36	0.51	-0.704	2	0.1	0.213	0.1	7.82277	5.82277	0.0029858	0.00181437	0.00661453	2.68227
2864.61	15.4	0.513	-0.705	2	0.1	0.213	0.1	7.84314	5.84314	0.00301498	0.001808	0.00663098	2.68227
2865.59	15.46	0.514	-0.705	2	0.1	0.213	0.1	7.87369	5.87369	0.0030247	0.001808	0.0066407	2.68227
2866.58	15.52	0.516	-0.706	2	0.1	0.213	0.1	7.90425	5.90425	0.00304415	0.00180163	0.00664742	2.68227
2867.56	15.52	0.517	-0.707	2	0.1	0.213	0.1	7.90425	5.90425	0.00305388	0.00179527	0.00664442	2.68227
2868.55	15.54	0.517	-0.708	2	0.1	0.213	0.1	7.91444	5.91444	0.00305388	0.0017889	0.00663168	2.68227
2869.53	15.54	0.519	-0.708	2	0.1	0.213	0.1	7.91444	5.91444	0.00307333	0.0017889	0.00665114	2.68227
2870.62	15.56	0.519	-0.709	2	0.1	0.213	0.1	7.92462	5.92462	0.00307333	0.00178254	0.0066384	2.68227
2871.61	15.56	0.519	-0.709	2	0.1	0.213	0.1	7.92462	5.92462	0.00307333	0.00178254	0.0066384	2.68227
2872.59	15.56	0.519	-0.71	2	0.1	0.213	0.1	7.92462	5.92462	0.00307333	0.00177617	0.00662567	2.68227
2873.58	15.56	0.519	-0.71	2	0.1	0.213	0.1	7.92462	5.92462	0.00307333	0.00177617	0.00662567	2.68227
2874.56	15.58	0.52	-0.71	2	0.1	0.213	0.1	7.93481	5.93481	0.00308306	0.00177617	0.0066354	2.68227
2875.55	15.6	0.52	-0.71	2	0.1	0.213	0.1	7.945	5.945	0.00308306	0.00177617	0.0066354	2.68227
2876.53	15.58	0.52	-0.711	2	0.1	0.213	0.1	7.93481	5.93481	0.00308306	0.0017698	0.00662266	2.68227
2877.62	15.6	0.522	-0.711	2	0.1	0.213	0.1	7.945	5.945	0.00310251	0.0017698	0.00664212	2.68227
2878.61	15.6	0.522	-0.711	2	0.1	0.213	0.1	7.945	5.945	0.00310251	0.0017698	0.00664212	2.68227
2879.59	15.62	0.522	-0.711	2	0.1	0.213	0.1	7.95518	5.95518	0.00310251	0.0017698	0.00664212	2.68227
2880.58	15.62	0.523	-0.711	2	0.1	0.213	0.1	7.95518	5.95518	0.00311223	0.0017698	0.00665184	2.68227
2881.56	15.62	0.523	-0.712	2	0.1	0.213	0.1	7.95518	5.95518	0.00311223	0.00176344	0.00663911	2.68227
2882.55	15.62	0.523	-0.712	2	0.1	0.213	0.1	7.95518	5.95518	0.00311223	0.00176344	0.00663911	2.68227
2883.53	15.62	0.523	-0.712	2	0.1	0.213	0.1	7.95518	5.95518	0.00311223	0.00176344	0.00663911	2.68227
2884.62	15.62	0.523	-0.712	2	0.1	0.213	0.1	7.95518	5.95518	0.00311223	0.00176344	0.00663911	2.68227
2885.61	15.64	0.523	-0.712	2	0.1	0.213	0.1	7.96537	5.96537	0.00311223	0.00176344	0.00663911	2.68227
2886.59	15.64	0.523	-0.712	2	0.1	0.213	0.1	7.96537	5.96537	0.00311223	0.00176344	0.00663911	2.68227
2887.57	15.64	0.523	-0.712	2	0.1	0.213	0.1	7.96537	5.96537	0.00311223	0.00176344	0.00663911	2.68227
2888.56	15.64	0.523	-0.712	2	0.1	0.213	0.1	7.96537	5.96537	0.00311223	0.00176344	0.00663911	2.68227
2889.55	15.66	0.523	-0.712	2	0.1	0.213	0.1	7.97555	5.97555	0.00311223	0.00176344	0.00663911	2.68227
2890.53	15.66	0.523	-0.713	2	0.1	0.213	0.1	7.97555	5.97555	0.00311223	0.00175707	0.00662638	2.68227
2891.62	15.66	0.524	-0.713	2	0.1	0.213	0.1	7.97555	5.97555	0.00312196	0.00175707	0.0066361	2.68227
2892.61	15.64	0.524	-0.713	2	0.1	0.213	0.1	7.96537	5.96537	0.00312196	0.00175707	0.0066361	2.68227
2893.59	15.64	0.524	-0.713	2	0.1	0.213	0.1	7.96537	5.96537	0.00312196	0.00175707	0.0066361	2.68227
2894.58	15.66	0.524	-0.713	2	0.1	0.213	0.1	7.97555	5.97555	0.00312196	0.00175707	0.0066361	2.68227
2895.56	15.66	0.524	-0.713	2	0.1	0.213	0.1	7.97555	5.97555	0.00312196	0.00175707	0.0066361	2.68227
2896.55	15.66	0.524	-0.713	2	0.1	0.213	0.1	7.97555	5.97555	0.00312196	0.00175707	0.0066361	2.68227
2897.53	15.66	0.524	-0.713	2	0.1	0.213	0.1	7.97555	5.97555	0.00312196	0.00175707	0.0066361	2.68227
2898.62	15.68	0.526	-0.713	2	0.1	0.213	0.1	7.98574	5.98574	0.00314141	0.00175707	0.00665555	2.68227
2899.61	15.68	0.526	-0.713	2	0.1	0.213	0.1	7.98574	5.98574	0.00314141	0.00175707	0.00665555	2.68227
2900.59	15.68	0.526	-0.713	2	0.1	0.213	0.1	7.98574	5.98574	0.00314141	0.00175707	0.00665555	2.68227
2901.58	15.68	0.524	-0.713	2	0.1	0.213	0.1	7.98574	5.98574	0.00312196	0.00175707	0.0066361	2.68227
2902.56	15.66	0.526	-0.713	2	0.1	0.213	0.1	7.97555	5.97555	0.00314141	0.00175707	0.00665555	2.68227
2903.55	15.68	0.526	-0.713	2	0.1	0.213	0.1	7.98574	5.98574	0.00314141	0.00175707	0.00665555	2.68227
2904.53	15.68	0.526	-0.713	2	0.1	0.213	0.1	7.98574	5.98574	0.00314141	0.00175707	0.00665555	2.68227
2905.62	15.68	0.526	-0.714	2	0.1	0.213	0.1	7.98574	5.98574	0.00314141	0.0017507	0.00664282	2.68227
2906.61	15.7	0.526	-0.714	2	0.1	0.213	0.1	7.99593	5.99593	0.00314141	0.0017507	0.00664282	2.68227
2907.59	15.68	0.526	-0.714	2	0.1	0.213	0.1	7.98574	5.98574	0.00314141	0.0017507	0.00664282	2.68227
2908.58	15.68	0.526	-0.714	2	0.1	0.213	0.1	7.98574	5.98574	0.00314141	0.0017507	0.00664282	2.68227
2909.56	15.7	0.526	-0.714	2	0.1	0.213	0.1	7.99593	5.99593	0.00314141	0.0017507	0.00664282	2.68227
2910.55	15.7	0.526	-0.714	2	0.1	0.213	0.1	7.99593	5.99593	0.00314141	0.0017507	0.00664282	2.68227
2911.53	15.7	0.526	-0.714	2	0.1	0.213	0.1	7.99593	5.99593	0.00314141	0.0017507	0.00664282	2.68227
2912.62	15.7	0.527	-0.714	2	0.1	0.213	0.1	7.99593	5.99593	0.00315114	0.0017507	0.00665255	2.68227
2913.61	15.7	0.527	-0.714	2	0.1	0.213	0.1	7.99593	5.99593	0.00315114	0.0017507	0.00665255	2.68227
2914.59	15.7	0.527	-0.714	2	0.1	0.213	0.1	7.99593	5.99593	0.00315114	0.0017507	0.00665255	2.68227
2915.58	15.7	0.527	-0.714	2	0.1	0.213	0.1	7.99593	5.99593	0.00315114	0.0017507	0.00665255	2.68227
2916.56	15.72	0.527	-0.714	2	0.1	0.213	0.1	8.00611	6.00611	0.00315114	0.0017507	0.00665255	2.68227
2917.54	15.72	0.527	-0.714	2	0.1	0.213	0.1	8.00611	6.00611	0.00315114	0.0017507	0.00665255	2.68227
2918.53	15.7	0.527	-0.714	2	0.1	0.213	0.1	7.99593	5.99593	0.00315114	0.0017507	0.00665255	2.68227
2919.62	15.7	0.527	-0.714	2	0.1	0.213	0.1	7.99593	5.99593	0.00315114	0.0017507	0.00665255	2.68227
2920.61	15.7	0.527	-0.714	2	0.1	0.213	0.1	7.99593	5.99593	0.00315114	0.0017507	0.00665255	2.68227
2921.59	15.7	0.527	-0.714	2	0.1	0.213	0.1	7.99593	5.99593	0.00315114	0.0017507	0.00665255	2.68227
2922.58	15.7	0.527	-0.714	2	0.1	0.213	0.1	7.99593	5.99593	0.00315114	0.0017507	0.00665255	2.68227
2923.56	15.7	0.527	-0.714	2	0.1	0.213	0.1	7.99593	5.99593	0.00315114	0.0017507	0.00665255	2.68227
2924.55	15.7	0.527	-0.714	2	0.1	0.213	0.1	7.99593	5.99593	0.00315114	0.0017507	0.00665255	2.68227
2925.53	15.72	0.527	-0.714	2	0.1	0.213	0.1	8.00611	6.00611	0.00315114	0.0017507	0.00665255	2.68227
2926.62	15.7	0.527	-0.714	2	0.1	0.213	0.1	7.99593	5.99593	0.00315114	0.0017507	0.00665255	2.68227
2927.61	15.7	0.527	-0.714	2	0.1	0.213	0.1	7.99593	5.99593	0.00315114	0.0017507	0.00665255	2.68227
2928.59	15.7	0.527	-0.714	2	0.1	0.213	0.1	7.99593	5.99593	0.00315114	0.0017507	0.00665255	2.68227
2929.58	15.7	0.527	-0.714	2	0.1	0.213	0.1	7.99593	5.99593	0.00315114	0.0017507	0.00665255	2.68227
2930.56	15.7	0.527	-0.714	2	0.1	0.213	0.1	7.99593	5.99593	0.00315114	0.0017507	0.00665255	2.68227
2931.54	15.7	0.527	-0.714	2	0.1	0.213	0.1	7.99593	5.99593	0.00315114	0.0017507	0.00665255	2.68227
2932.53	15.7	0.527	-0.714	2	0.1	0.213	0.1	7.99593	5.99593	0.00315114	0.0017507	0.00665255	2.68227
2933.62	15.7	0.529	-0.714	2	0.1	0.213	0.1	7.99593	5.99593	0.00317059	0.0017507	0.006672	2.68227
2934.61	15.7	0.527	-0.714	2	0.1	0.213	0.1	7.99593	5.99593	0.00315114	0.0017507	0.00665255	2.68227
2935.59	15.7	0.527	-0.714	2	0.1	0.213	0.1	7.99593	5.99593	0.00315114	0.0017507	0.00665255	2.68227
2936.58	15.7	0.527	-0.715	2	0.1	0.213	0.1	7.99593	5.99593	0.00315114	0.00174434	0.00663981	2.68227
2937.56	15.7	0.527	-0.715	2	0.1	0.213	0.1	7.99593	5.99593	0.00315114	0.00174434	0.00663981	2.68227
2938.55	15.7	0.529	-0.715	2	0.1	0.213	0.1	7.99593	5.99593	0.00317059	0.00174434	0.00665927	2.68227
2939.53	15.7	0.529	-0.715	2	0.1	0.213	0.1	7.99593	5.99593	0.00317059	0.00174434	0.00665927	2.68227
2940.62	15.7	0.527	-0.715	2	0.1	0.213	0.1	7.99593	5.99593	0.00315114	0.00174434	0.00663981	2.68227
2941.61	15.7	0.529	-0.715	1.995	0.1	0.213	0.1	7.99593	6.00093	0.00317059	0.00174434	0.00665927	2.68227
2942.59	15.72	0.529	-0.715	2	0.1	0.213	0.1	8.00611	6.00611	0.00317059	0.00174434	0.00665927	2.68227
2943.58	15.7	0.529	-0.715	1.995	0.1	0.213	0.1	7.99593	6.00093	0.00317059	0.00174434	0.00665927	2.68227
2944.56	15.7	0.529	-0.715	1.995	0.1	0.213	0.1	7.99593	6.00093	0.00317059	0.00174434	0.00665927	2.68227
2945.55	15.7	0.529	-0.715	2	0.1	0.213	0.1	7.99593	5.99593	0.00317059	0.00174434	0.00665927	2.68227
2946.53	15.7	0.529	-0.715	2	0.1	0.213	0.1	7.99593	5.99593	0.00317059	0.00174434	0.00665927	2.68227
2947.62	15.7	0.529	-0.715	2	0.1	0.213	0.1	7.99593	5.99593	0.00317059	0.00174434	0.00665927	2.68227
2948.61	15.7	0.529	-0.715	2	0.1	0.213	0.1	7.99593	5.99593	0.00317059	0.00174434	0.00665927	2.68227
2949.59	15.7	0.529	-0.715	2	0.1	0.213	0.1	7.99593	5.99593	0.00317059	0.00174434	0.00665927	2.68227
2950.58	15.7	0.529	-0.715	2	0.1	0.213	0.1	7.99593	5.99593	0.00317059	0.00174434	0.00665927	2.68227
2951.56	15.7	0.529	-0.715	2	0.1	0.213	0.1	7.99593	5.99593	0.00317059	0.00174434	0.00665927	2.68227
2952.55	15.7	0.529	-0.715	2	0.1	0.213	0.1	7.99593	5.99593	0.00317059	0.00174434	0.00665927	2.68227
2953.53	15.7	0.529	-0.715	2	0.1	0.213	0.1	7.99593	5.99593	0.00317059	0.00174434	0.00665927	2.68227
2954.62	15.7	0.529	-0.715	2	0.1	0.213	0.1	7.99593	5.99593	0.00317059	0.00174434	0.00665927	2.68227
2955.61	15.7	0.529	-0.715	2	0.1	0.213	0.1	7.99593	5.99593	0.00317059	0.00174434	0.00665927	2.68227
2956.59	15.7	0.529	-0.715	2	0.1	0.213	0.1	7.99593	5.99593	0.00317059	0.00174434	0.00665927	2.68227
2957.58	15.7	0.529	-0.715	2	0.1	0.213	0.1	7.99593	5.99593	0.00317059	0.00174434	0.00665927	2.68227
2958.56	15.7	0.529	-0.715	2	0.1	0.213	0.1	7.99593	5.99593	0.00317059	0.00174434	0.00665927	2.68227
2959.55	15.7	0.529	-0.715	2	0.1	0.213	0.1	7.99593	5.99593	0.00317059	0.00174434	0.00665927	2.68227
2960.53	15.7	0.529	-0.715	2	0.1	0.213	0.1	7.99593	5.99593	0.00317059	0.00174434	0.00665927	2.68227
2961.62	15.7	0.529	-0.715	2	0.1	0.213	0.1	7.99593	5.99593	0.00317059	0.00174434	0.00665927	2.68227
2962.61	15.7	0.529	-0.715	2	0.1	0.213	0.1	7.99593	5.99593	0.00317059	0.00174434	0.00665927	2.68227
2963.59	15.7	0.529	-0.715	1.995	0.1	0.213	0.1	7.99593	6.00093	0.00317059	0.00174434	0.00665927	2.68227
2964.58	15.7	0.529	-0.715	2	0.1	0.213	0.1	7.99593	5.99593	0.00317059	0.00174434	0.00665927	2.68227
2965.56	15.68	0.529	-0.715	2	0.1	0.213	0.1	7.98574	5.98574	0.00317059	0.00174434	0.00665927	2.68227
2966.55	15.68	0.529	-0.715	2	0.1	0.213	0.1	7.98574	5.98574	0.00317059	0.00174434	0.00665927	2.68227
2967.53	15.68	0.529	-0.715	2	0.1	0.213	0.1	7.98574	5.98574	0.00317059	0.00174434	0.00665927	2.68227
2968.62	15.7	0.529	-0.715	2	0.1	0.213	0.1	7.99593	5.99593	0.00317059	0.00174434	0.00665927	2.68227
2969.61	15.7	0.529	-0.715	2	0.1	0.213	0.1	7.99593	5.99593	0.00317059	0.00174434	0.00665927	2.68227
2970.59	15.7	0.529	-0.715	2	0.1	0.213	0.1	7.99593	5.99593	0.00317059	0.00174434	0.00665927	2.68227
2971.58	15.7	0.529	-0.715	2	0.1	0.213	0.1	7.99593	5.99593	0.00317059	0.00174434	0.00665927	2.68227
2972.56	15.7	0.529	-0.715	2	0.1	0.213	0.1	7.99593	5.99593	0.00317059	0.00174434	0.00665927	2.68227
2973.55	15.7	0.529	-0.715	2	0.1	0.213	0.1	7.99593	5.99593	0.00317059	0.00174434	0.00665927	2.68227
2974.53	15.7	0.529	-0.715	2	0.1	0.213	0.1	7.99593	5.99593	0.00317059	0.00174434	0.00665927	2.68227
2975.62	15.7	0.529	-0.715	2	0.1	0.213	0.1	7.99593	5.99593	0.00317059	0.00174434	0.00665927	2.68227
2976.61	15.7	0.529	-0.715	2	0.1	0.213	0.1	7.99593	5.99593	0.00317059	0.00174434	0.00665927	2.68227
2977.59	15.7	0.529	-0.715	2	0.1	0.213	0.1	7.99593	5.99593	0.00317059	0.00174434	0.00665927	2.68227
2978.58	15.7	0.529	-0.715	2	0.1	0.213	0.1	7.99593	5.99593	0.00317059	0.00174434	0.00665927	2.68227
2979.56	15.7	0.529	-0.715	2	0.1	0.213	0.1	7.99593	5.99593	0.00317059	0.00174434	0.00665927	2.68227
2980.55	15.72	0.529	-0.715	2	0.1	0.213	0.1	8.00611	6.00611	0.00317059	0.00174434	0.00665927	2.68227
2981.53	15.72	0.529	-0.715	2	0.1	0.213	0.1	8.00611	6.00611	0.00317059	0.00174434	0.00665927	2.68227
2982.62	15.74	0.529	-0.715	2	0.1	0.213	0.1	8.0163	6.0163	0.00317059	0.00174434	0.00665927	2.68227
2983.61	15.72	0.529	-0.715	2	0.1	0.213	0.1	8.00611	6.00611	0.00317059	0.00174434	0.00665927	2.68227
2984.59	15.72	0.529	-0.715	2	0.1	0.213	0.1	8.00611	6.00611	0.00317059	0.00174434	0.00665927	2.68227
2985.58	15.72	0.529	-0.715	2	0.1	0.213	0.1	8.00611	6.00611	0.00317059	0.00174434	0.00665927	2.68227
2986.56	15.72	0.529	-0.715	2	0.1	0.213	0.1	8.00611	6.00611	0.00317059	0.00174434	0.00665927	2.68227
2987.55	15.72	0.529	-0.715	2	0.1	0.213	0.1	8.00611	6.00611	0.00317059	0.00174434	0.00665927	2.68227
2988.53	15.72	0.529	-0.715	2	0.1	0.213	0.1	8.00611	6.00611	0.00317059	0.00174434	0.00665927	2.68227
2989.62	15.7	0.529	-0.715	2	0.1	0.213	0.1	7.99593	5.99593	0.00317059	0.00174434	0.00665927	2.68227
2990.61	15.7	0.529	-0.715	2	0.1	0.213	0.1	7.99593	5.99593	0.00317059	0.00174434	0.00665927	2.68227
2991.59	15.7	0.529	-0.715	2	0.1	0.213	0.1	7.99593	5.99593	0.00317059	0.00174434	0.00665927	2.68227
2992.57	15.7	0.529	-0.715	2	0.1	0.213	0.1	7.99593	5.99593	0.00317059	0.00174434	0.00665927	2.68227
2993.56	15.7	0.529	-0.715	2	0.1	0.213	0.1	7.99593	5.99593	0.00317059	0.00174434	0.00665927	2.68227
2994.55	15.7	0.529	-0.715	2	0.1	0.213	0.1	7.99593	5.99593	0.00317059	0.00174434	0.00665927	2.68227
2995.53	15.7	0.529	-0.715	2	0.1	0.213	0.1	7.99593	5.99593	0.00317059	0.00174434	0.00665927	2.68227
2996.62	15.7	0.529	-0.715	2	0.1	0.213	0.1	7.99593	5.99593	0.00317059	0.00174434	0.00665927	2.68227
2997.61	15.7	0.53	-0.715	2	0.1	0.213	0.1	7.99593	5.99593	0.00318032	0.00174434	0.00666899	2.68227
2998.59	15.7	0.53	-0.715	2	0.1	0.213	0.1	7.99593	5.99593	0.00318032	0.00174434	0.00666899	2.68227
2999.58	15.7	0.529	-0.715	2	0.1	0.213	0.1	7.99593	5.99593	0.00317059	0.00174434	0.00665927	2.68227
3000.56	15.7	0.53	-0.715	2	0.1	0.213	0.1	7.99593	5.99593	0.00318032	0.00174434	0.00666899	2.68227
3001.55	15.7	0.529	-0.715	2	0.1	0.213	0.1	7.99593	5.99593	0.00317059	0.00174434	0.00665927	2.68227
3002.53	15.72	0.53	-0.715	2	0.1	0.213	0.1	8.00611	6.00611	0.00318032	0.00174434	0.00666899	2.68227
3003.62	15.72	0.529	-0.715	2	0.1	0.213	0.1	8.00611	6.00611	0.00317059	0.00174434	0.00665927	2.68227
3004.61	15.72	0.53	-0.715	2	0.1	0.213	0.1	8.00611	6.00611	0.00318032	0.00174434	0.00666899	2.68227
3005.59	15.72	0.53	-0.715	2	0.1	0.213	0.1	8.00611	6.00611	0.00318032	0.00174434	0.00666899	2.68227
3006.58	15.72	0.53	-0.715	2	0.1	0.213	0.1	8.00611	6.00611	0.00318032	0.00174434	0.00666899	2.68227
3007.56	15.7	0.53	-0.715	2	0.1	0.213	0.1	7.99593	5.99593	0.00318032	0.00174434	0.00666899	2.68227
3008.55	15.7	0.53	-0.715	2	0.1	0.213	0.1	7.99593	5.99593	0.00318032	0.00174434	0.00666899	2.68227
3009.53	15.7	0.53	-0.715	2	0.1	0.213	0.1	7.99593	5.99593	0.00318032	0.00174434	0.00666899	2.68227
3010.62	15.7	0.53	-0.715	2	0.1	0.213	0.1	7.99593	5.99593	0.00318032	0.00174434	0.00666899	2.68227
3011.61	15.7	0.529	-0.715	2	0.1	0.213	0.1	7.99593	5.99593	0.00317059	0.00174434	0.00665927	2.68227
3012.59	15.7	0.53	-0.715	2	0.1	0.213	0.1	7.99593	5.99593	0.00318032	0.00174434	0.00666899	2.68227
3013.58	15.7	0.53	-0.715	2	0.1	0.213	0.1	7.99593	5.99593	0.00318032	0.00174434	0.00666899	2.68227
3014.56	15.7	0.53	-0.715	2	0.1	0.213	0.1	7.99593	5.99593	0.00318032	0.00174434	0.00666899	2.68227
3015.55	15.7	0.53	-0.715	2	0.1	0.213	0.1	7.99593	5.99593	0.00318032	0.00174434	0.00666899	2.68227
3016.53	15.7	0.53	-0.715	2	0.1	0.213	0.1	7.99593	5.99593	0.00318032	0.00174434	0.00666899	2.68227
3017.62	15.7	0.53	-0.715	2	0.1	0.213	0.1	7.99593	5.99593	0.00318032	0.00174434	0.00666899	2.68227
3018.61	15.7	0.53	-0.715	2	0.1	0.213	0.1	7.99593	5.99593	0.00318032	0.00174434	0.00666899	2.68227
3019.59	15.7	0.53	-0.715	2	0.1	0.213	0.1	7.99593	5.99593	0.00318032	0.00174434	0.00666899	2.68227
3020.58	15.72	0.53	-0.715	2	0.1	0.213	0.1	8.00611	6.00611	0.00318032	0.00174434	0.00666899	2.68227
3021.56	15.7	0.53	-0.715	2	0.1	0.213	0.1	7.99593	5.99593	0.00318032	0.00174434	0.00666899	2.68227
3022.54	15.7	0.53	-0.715	2	0.1	0.213	0.1	7.99593	5.99593	0.00318032	0.00174434	0.00666899	2.68227
3023.53	15.7	0.53	-0.715	2	0.1	0.213	0.1	7.99593	5.99593	0.00318032	0.00174434	0.00666899	2.68227
3024.62	15.7	0.53	-0.715	2	0.1	0.213	0.1	7.99593	5.99593	0.00318032	0.00174434	0.00666899	2.68227
3025.61	15.7	0.53	-0.715	2	0.1	0.213	0.1	7.99593	5.99593	0.00318032	0.00174434	0.00666899	2.68227
3026.59	15.7	0.53	-0.715	2	0.1	0.213	0.1	7.99593	5.99593	0.00318032	0.00174434	0.00666899	2.68227
3027.57	15.7	0.53	-0.715	2	0.1	0.213	0.1	7.99593	5.99593	0.00318032	0.00174434	0.00666899	2.68227
3028.56	15.7	0.53	-0.715	2	0.1	0.213	0.1	7.99593	5.99593	0.00318032	0.00174434	0.00666899	2.68227
3029.55	15.7	0.53	-0.715	2	0.1	0.213	0.1	7.99593	5.99593	0.00318032	0.00174434	0.00666899	2.68227
3030.53	15.72	0.53	-0.715	2	0.1	0.213	0.1	8.00611	6.00611	0.00318032	0.00174434	0.00666899	2.68227
3031.62	15.7	0.53	-0.715	2	0.1	0.213	0.1	7.99593	5.99593	0.00318032	0.00174434	0.00666899	2.68227
3032.61	15.7	0.53	-0.715	2	0.1	0.213	0.1	7.99593	5.99593	0.00318032	0.00174434	0.00666899	2.68227
3033.59	15.7	0.53	-0.715	2	0.1	0.213	0.1	7.99593	5.99593	0.00318032	0.00174434	0.00666899	2.68227
3034.58	15.7	0.53	-0.715	2	0.1	0.213	0.1	7.99593	5.99593	0.00318032	0.00174434	0.00666899	2.68227
3035.56	15.7	0.53	-0.715	2	0.1	0.213	0.1	7.99593	5.99593	0.00318032	0.00174434	0.00666899	2.68227
3036.55	15.7	0.53	-0.715	2	0.1	0.213	0.1	7.99593	5.99593	0.00318032	0.00174434	0.00666899	2.68227
3037.53	15.7	0.53	-0.715	2	0.1	0.213	0.1	7.99593	5.99593	0.00318032	0.00174434	0.00666899	2.68227
3038.62	15.7	0.53	-0.715	2	0.1	0.213	0.1	7.99593	5.99593	0.00318032	0.00174434	0.00666899	2.68227
3039.61	15.7	0.53	-0.715	2	0.1	0.213	0.1	7.99593	5.99593	0.00318032	0.00174434	0.00666899	2.68227
3040.59	15.7	0.53	-0.715	2	0.1	0.213	0.1	7.99593	5.99593	0.00318032	0.00174434	0.00666899	2.68227
3041.58	15.7	0.53	-0.715	2.005	0.1	0.213	0.1	7.99593	5.99093	0.00318032	0.00174434	0.00666899	2.68227
3042.56	15.7	0.53	-0.715	2.035	0.1	0.213	0.1	7.99593	5.96093	0.00318032	0.00174434	0.00666899	2.68227
3043.55	15.7	0.53	-0.714	2.075	0.1	0.213	0.1	7.99593	5.92093	0.00318032	0.0017507	0.00668172	2.68227
3044.53	15.7	0.53	-0.714	2.09	0.1	0.213	0.1	7.99593	5.90593	0.00318032	0.0017507	0.00668172	2.68227
3045.62	15.7	0.53	-0.713	2.14	0.1	0.213	0.1	7.99593	5.85593	0.00318032	0.00175707	0.00669446	2.68227
3046.61	15.7	0.53	-0.712	2.2	0.1	0.213	0.1	7.99593	5.79593	0.00318032	0.00176344	0.00670719	2.68227
3047.59	15.7	0.53	-0.711	2.265	0.1	0.213	0.1	7.99593	5.73093	0.00318032	0.0017698	0.00671992	2.68227
3048.57	15.7	0.53	-0.71	2.33	0.1	0.213	0.1	7.99593	5.66593	0.00318032	0.00177617	0.00673265	2.68227
3049.56	15.7	0.53	-0.708	2.385	0.1	0.213	0.1	7.99593	5.61093	0.00318032	0.0017889	0.00675812	2.68227
3050.55	15.72	0.53	-0.707	2.44	0.1	0.213	0.1	8.00611	5.56611	0.00318032	0.00179527	0.00677085	2.68227
3051.53	15.7	0.53	-0.705	2.49	0.1	0.213	0.1	7.99593	5.50593	0.00318032	0.001808	0.00679632	2.68227
3052.62	15.7	0.53	-0.704	2.56	0.1	0.213	0.1	7.99593	5.43593	0.00318032	0.00181437	0.00680905	2.68227
3053.61	15.7	0.53	-0.703	2.6	0.1	0.213	0.1	7.99593	5.39593	0.00318032	0.00182073	0.00682178	2.68227
3054.59	15.7	0.53	-0.702	2.645	0.1	0.213	0.1	7.99593	5.35093	0.00318032	0.0018271	0.00683451	2.68227
3055.58	15.7	0.53	-0.701	2.69	0.1	0.213	0.1	7.99593	5.30593	0.00318032	0.00183346	0.00684725	2.68227
3056.56	15.7	0.53	-0.7	2.735	0.1	0.213	0.1	7.99593	5.26093	0.00318032	0.00183983	0.00685998	2.68227
3057.55	15.7	0.53	-0.699	2.785	0.1	0.213	0.1	7.99593	5.21093	0.00318032	0.0018462	0.00687271	2.68227
3058.53	15.7	0.53	-0.698	2.835	0.1	0.213	0.1	7.99593	5.16093	0.00318032	0.00185256	0.00688544	2.68227
3059.62	15.7	0.53	-0.697	2.885	0.1	0.213	0.1	7.99593	5.11093	0.00318032	0.00185893	0.00689817	2.68227
3060.61	15.72	0.53	-0.696	2.94	0.1	0.213	0.1	8.00611	5.06611	0.00318032	0.0018653	0.00691091	2.68227
3061.59	15.7	0.53	-0.695	2.99	0.1	0.213	0.1	7.99593	5.00593	0.00318032	0.00187166	0.00692364	2.68227
3062.57	15.72	0.53	-0.694	3.035	0.1	0.213	0.1	8.00611	4.97111	0.00318032	0.00187803	0.00693637	2.68227
3063.56	15.7	0.53	-0.692	3.08	0.1	0.213	0.1	7.99593	4.91593	0.00318032	0.00189076	0.00696184	2.68227
3064.55	15.7	0.53	-0.691	3.135	0.1	0.213	0.1	7.99593	4.86093	0.00318032	0.00189713	0.00697457	2.68227
3065.53	15.7	0.53	-0.69	3.185	0.1	0.213	0.1	7.99593	4.81093	0.00318032	0.00190349	0.0069873	2.68227
3066.62	15.7	0.53	-0.688	3.24	0.1	0.213	0.1	7.99593	4.75593	0.00318032	0.00191623	0.00701277	2.68227
3067.61	15.7	0.53	-0.687	3.285	0.1	0.213	0.1	7.99593	4.71093	0.00318032	0.00192259	0.0070255	2.68227
3068.59	15.7	0.529	-0.685	3.335	0.1	0.213	0.1	7.99593	4.66093	0.00317059	0.00193532	0.00704124	2.68227
3069.58	15.7	0.53	-0.684	3.385	0.1	0.213	0.1	7.99593	4.61093	0.00318032	0.00194169	0.0070637	2.68227
3070.56	15.7	0.53	-0.683	3.43	0.1	0.213	0.095	7.99593	4.56593	0.00318032	0.00194806	0.00707643	2.54815
3071.55	15.7	0.53	-0.681	3.485	0.1	0.213	0.095	7.99593	4.51093	0.00318032	0.00196079	0.00710189	2.54815
3072.53	15.7	0.53	-0.68	3.535	0.1	0.213	0.095	7.99593	4.46093	0.00318032	0.00196716	0.00711463	2.54815
3073.62	15.7	0.53	-0.678	3.59	0.1	0.213	0.095	7.99593	4.40593	0.00318032	0.00197989	0.00714009	2.54815
3074.61	15.7	0.53	-0.677	3.635	0.1	0.213	0.095	7.99593	4.36093	0.00318032	0.00198625	0.00715282	2.54815
3075.59	15.7	0.53	-0.675	3.685	0.1	0.213	0.095	7.99593	4.31093	0.00318032	0.00199899	0.00717829	2.54815
3076.58	15.7	0.53	-0.674	3.74	0.1	0.213	0.095	7.99593	4.25593	0.00318032	0.00200535	0.00719102	2.54815
3077.56	15.7	0.53	-0.673	3.785	0.1	0.213	0.095	7.99593	4.21093	0.00318032	0.00201172	0.00720375	2.54815
3078.55	15.7	0.53	-0.671	3.835	0.1	0.213	0.095	7.99593	4.16093	0.00318032	0.00202445	0.00722922	2.54815
3079.53	15.7	0.53	-0.67	3.88	0.1	0.213	0.095	7.99593	4.11593	0.00318032	0.00203082	0.00724195	2.54815
3080.62	15.7	0.53	-0.668	3.935	0.1	0.213	0.095	7.99593	4.06093	0.00318032	0.00204355	0.00726741	2.54815
3081.61	15.7	0.53	-0.667	3.985	0.1	0.213	0.095	7.99593	4.01093	0.00318032	0.00204992	0.00728015	2.54815
3082.59	15.72	0.53	-0.665	4.04	0.1	0.213	0.095	8.00611	3.96611	0.00318032	0.00206265	0.00730561	2.54815
3083.58	15.72	0.53	-0.664	4.09	0.1	0.213	0.095	8.00611	3.91611	0.00318032	0.00206901	0.00731834	2.54815
3084.56	15.7	0.53	-0.662	4.135	0.1	0.213	0.095	7.99593	3.86093	0.00318032	0.00208175	0.00734381	2.54815
3085.55	15.7	0.53	-0.661	4.185	0.1	0.213	0.095	7.99593	3.81093	0.00318032	0.00208811	0.00735654	2.54815
3086.53	15.72	0.53	-0.659	4.235	0.1	0.213	0.095	8.00611	3.77111	0.00318032	0.00210085	0.00738201	2.54815
3087.62	15.72	0.53	-0.658	4.29	0.1	0.213	0.095	8.00611	3.71611	0.00318032	0.00210721	0.00739474	2.54815
3088.61	15.7	0.53	-0.656	4.34	0.1	0.213	0.095	7.99593	3.65593	0.00318032	0.00211994	0.0074202	2.54815
3089.59	15.7	0.53	-0.655	4.39	0.1	0.213	0.095	7.99593	3.60593	0.00318032	0.00212631	0.00743294	2.54815
3090.58	15.7	0.53	-0.654	4.44	0.1	0.213	0.095	7.99593	3.55593	0.00318032	0.00213268	0.00744567	2.54815
3091.56	15.72	0.53	-0.652	4.485	0.1	0.213	0.095	8.00611	3.52111	0.00318032	0.00214541	0.00747113	2.54815
3092.55	15.7	0.53	-0.651	4.535	0.1	0.213	0.095	7.99593	3.46093	0.00318032	0.00215177	0.00748386	2.54815
3093.53	15.72	0.53	-0.649	4.585	0.1	0.213	0.095	8.00611	3.42111	0.00318032	0.00216451	0.00750933	2.54815
3094.62	15.7	0.53	-0.647	4.64	0.1	0.213	0.095	7.99593	3.35593	0.00318032	0.00217724	0.00753479	2.54815
3095.61	15.7	0.529	-0.646	4.685	0.1	0.213	0.095	7.99593	3.31093	0.00317059	0.00218361	0.0075378	2.54815
3096.59	15.7	0.53	-0.645	4.74	0.1	0.213	0.095	7.99593	3.25593	0.00318032	0.00218997	0.00756026	2.54815
3097.57	15.72	0.53	-0.643	4.785	0.1	0.213	0.095	8.00611	3.22111	0.00318032	0.0022027	0.00758572	2.54815
3098.56	15.7	0.529	-0.642	4.835	0.1	0.213	0.095	7.99593	3.16093	0.00317059	0.00220907	0.00758873	2.54815
3099.55	15.7	0.529	-0.64	4.885	0.1	0.213	0.095	7.99593	3.11093	0.00317059	0.0022218	0.0076142	2.54815
3100.53	15.72	0.53	-0.639	4.935	0.1	0.213	0.095	8.00611	3.07111	0.00318032	0.00222817	0.00763665	2.54815
3101.62	15.7	0.529	-0.637	4.99	0.1	0.213	0.09	7.99593	3.00593	0.00317059	0.0022409	0.00765239	2.41404
3102.61	15.72	0.53	-0.636	5.04	0.1	0.213	0.09	8.00611	2.96611	0.00318032	0.00224727	0.00767485	2.41404
3103.59	15.7	0.529	-0.634	5.09	0.1	0.213	0.09	7.99593	2.90593	0.00317059	0.00226	0.00769059	2.41404
3104.57	15.7	0.529	-0.633	5.14	0.1	0.213	0.09	7.99593	2.85593	0.00317059	0.00226637	0.00770332	2.41404
3105.56	15.7	0.529	-0.631	5.185	0.1	0.213	0.09	7.99593	2.81093	0.00317059	0.0022791	0.00772879	2.41404
3106.55	15.72	0.529	-0.63	5.235	0.1	0.213	0.09	8.00611	2.77111	0.00317059	0.00228546	0.00774152	2.41404
3107.53	15.72	0.529	-0.628	5.29	0.1	0.213	0.09	8.00611	2.71611	0.00317059	0.0022982	0.00776698	2.41404
3108.62	15.72	0.529	-0.627	5.34	0.1	0.213	0.09	8.00611	2.66611	0.00317059	0.00230456	0.00777972	2.41404
3109.61	15.7	0.529	-0.625	5.39	0.1	0.213	0.09	7.99593	2.60593	0.00317059	0.0023173	0.00780518	2.41404
3110.59	15.72	0.529	-0.624	5.44	0.1	0.213	0.09	8.00611	2.56611	0.00317059	0.00232366	0.00781791	2.41404
3111.58	15.7	0.53	-0.623	5.49	0.1	0.213	0.09	7.99593	2.50593	0.00318032	0.00233003	0.00784037	2.41404
3112.56	15.72	0.529	-0.621	5.535	0.1	0.213	0.09	8.00611	2.47111	0.00317059	0.00234276	0.00785611	2.41404
3113.54	15.72	0.529	-0.62	5.585	0.1	0.213	0.09	8.00611	2.42111	0.00317059	0.00234913	0.00786884	2.41404
3114.53	15.72	0.529	-0.618	5.64	0.1	0.213	0.09	8.00611	2.36611	0.00317059	0.00236186	0.00789431	2.41404
3115.62	15.7	0.529	-0.617	5.68	0.1	0.213	0.09	7.99593	2.31593	0.00317059	0.00236823	0.00790704	2.41404
3116.61	15.7	0.529	-0.616	5.735	0.1	0.213	0.09	7.99593	2.26093	0.00317059	0.00237459	0.00791977	2.41404
3117.59	15.7	0.529	-0.614	5.79	0.1	0.213	0.09	7.99593	2.20593	0.00317059	0.00238732	0.00794524	2.41404
3118.58	15.7	0.529	-0.613	5.835	0.1	0.213	0.09	7.99593	2.16093	0.00317059	0.00239369	0.00795797	2.41404
3119.56	15.7	0.529	-0.611	5.885	0.1	0.213	0.09	7.99593	2.11093	0.00317059	0.00240642	0.00798343	2.41404
3120.55	15.7	0.529	-0.61	5.935	0.1	0.213	0.09	7.99593	2.06093	0.00317059	0.00241279	0.00799617	2.41404
3121.53	15.7	0.529	-0.609	5.985	0.1	0.213	0.09	7.99593	2.01093	0.00317059	0.00241916	0.0080089	2.41404
3122.62	15.7	0.529	-0.607	6.04	0.1	0.213	0.09	7.99593	1.95593	0.00317059	0.00243189	0.00803436	2.41404
3123.61	15.7	0.529	-0.606	6.09	0.1	0.213	0.09	7.99593	1.90593	0.00317059	0.00243825	0.0080471	2.41404
3124.59	15.72	0.529	-0.604	6.14	0.1	0.213	0.09	8.00611	1.86611	0.00317059	0.00245099	0.00807256	2.41404
3125.58	15.7	0.529	-0.603	6.185	0.1	0.213	0.09	7.99593	1.81093	0.00317059	0.00245735	0.00808529	2.41404
3126.56	15.72	0.529	-0.602	6.24	0.1	0.213	0.09	8.00611	1.76611	0.00317059	0.00246372	0.00809803	2.41404
3127.55	15.72	0.529	-0.601	6.285	0.1	0.213	0.09	8.00611	1.72111	0.00317059	0.00247008	0.00811076	2.41404
3128.53	15.72	0.529	-0.599	6.335	0.1	0.213	0.09	8.00611	1.67111	0.00317059	0.00248282	0.00813622	2.41404
3129.62	15.72	0.529	-0.598	6.39	0.1	0.213	0.09	8.00611	1.61611	0.00317059	0.00248918	0.00814896	2.41404
3130.61	15.72	0.529	-0.597	6.44	0.1	0.213	0.09	8.00611	1.56611	0.00317059	0.00249555	0.00816169	2.41404
3131.59	15.7	0.529	-0.595	6.49	0.1	0.213	0.09	7.99593	1.50593	0.00317059	0.00250828	0.00818715	2.41404
3132.57	15.7	0.527	-0.594	6.54	0.1	0.213	0.09	7.99593	1.45593	0.00315114	0.00251465	0.00818043	2.41404
3133.56	15.7	0.527	-0.593	6.59	0.1	0.213	0.09	7.99593	1.40593	0.00315114	0.00252101	0.00819317	2.41404
3134.55	15.7	0.527	-0.592	6.635	0.1	0.213	0.09	7.99593	1.36093	0.00315114	0.00252738	0.0082059	2.41404
3135.53	15.7	0.529	-0.59	6.68	0.1	0.213	0.09	7.99593	1.31593	0.00317059	0.00254011	0.00825082	2.41404
3136.62	15.7	0.527	-0.589	6.74	0.1	0.213	0.09	7.99593	1.25593	0.00315114	0.00254648	0.0082441	2.41404
3137.61	15.7	0.527	-0.588	6.785	0.1	0.213	0.09	7.99593	1.21093	0.00315114	0.00255285	0.00825683	2.41404
3138.59	15.7	0.527	-0.586	6.84	0.1	0.213	0.09	7.99593	1.15593	0.00315114	0.00256558	0.00828229	2.41404
3139.58	15.7	0.527	-0.585	6.89	0.1	0.213	0.09	7.99593	1.10593	0.00315114	0.00257194	0.00829503	2.41404
3140.56	15.7	0.527	-0.584	6.935	0.1	0.213	0.09	7.99593	1.06093	0.00315114	0.00257831	0.00830776	2.41404
3141.55	15.7	0.527	-0.583	6.985	0.1	0.213	0.09	7.99593	1.01093	0.00315114	0.00258468	0.00832049	2.41404
3142.53	15.72	0.527	-0.582	7.035	0.1	0.213	0.09	8.00611	0.971112	0.00315114	0.00259104	0.00833322	2.41404
3143.62	15.72	0.527	-0.58	7.09	0.1	0.213	0.09	8.00611	0.916112	0.00315114	0.00260377	0.00835869	2.41404
3144.61	15.72	0.527	-0.579	7.14	0.1	0.213	0.09	8.00611	0.866112	0.00315114	0.00261014	0.00837142	2.41404
3145.59	15.7	0.527	-0.578	7.19	0.1	0.213	0.09	7.99593	0.805926	0.00315114	0.00261651	0.00838415	2.41404
3146.58	15.7	0.527	-0.576	7.24	0.1	0.213	0.085	7.99593	0.755926	0.00315114	0.00262924	0.00840962	2.27993
3147.56	15.7	0.527	-0.575	7.29	0.1	0.213	0.09	7.99593	0.705926	0.00315114	0.00263561	0.00842235	2.41404
[truncated: 6,172 more rows]
